# Supplementary material for: Plasma Proteomics Identifies Insulin Resistance Signatures Predictive of Cardiometabolic Disease Risk
Source: Research Square preprint supplement (doi:10.21203/rs.3.rs-8585654/v1), 2026-01-21
Supplement: Supplementary file 1 [file 643e891721b31865a23ff986.docx]

**Supplementary information**

Table 1: Clinical parameters for the three cohorts

Table 2: M-value protein-wide correlations for all proteomics workflows

Table 3: M-value associated proteins adjusted for covariates

Table 4: The insulin-regulated plasma proteome

Table 5: Tissue of origin enrichment analysis

Table 6: Exercise training effects on the plasma proteome for all proteomics workflows

Table 7: Summary statistics of UK Biobank disease incidence risk prediction scores
