# Supplementary material for: Plasma Proteomics Identifies Insulin Resistance Signatures Predictive of Cardiometabolic Disease Risk
Source: Research Square preprint supplement (doi:10.21203/rs.3.rs-8585654/v1), 2026-01-21
Supplement: Supplementary file 2 [file Supplementary_Table_01.xlsx]

## Sheet: Ark1
Mean ± SD
Discovery cohort
	NGT	T2D
Age (years)	56,2 ± 9	59,7 ± 8
BMI (kg/m²)	26,8 ± 2,6	29,1 ± 3,6
HbA1c (mmol/mol)	35,6 ± 3,7	49,7 ± 6,8
FBG (mmol/L)	5,4 ± 0,5	7,9 ± 1,5
Fasting Insulin (mIU/L)	6,55 ± 3,9	15,1 ± 16
M-value (μmol·kg⁻¹·min⁻¹)	31,9 ± 13	14 ± 9,6
Exercise cohort
	Lean	Obese	T2D
Age (years)	56,2 ± 6	53,8 ± 7	56,1 ± 6
BMI (kg/m²)	24,0 ± 1,6	30,8 ± 2,7	31,3 ± 3,2
HbA1c (mmol/mol)	34,7 ± 2,6	34,8 ± 3,3	54,8 ± 14,7
FBG (mmol/L)	5,2 ± 0,4	5,6 ± 0,5	9,8 ± 3,1
Fasting Insulin (pmol/L)	58,7 ± 41	70,9 ± 33	114 ± 81
M-value (μmol·kg⁻¹·min⁻¹)	47,4 ± 15	39,9 ± 11	24,9 ± 14
Validation cohort
	NGT	T2D
Age (years)	60,8 ± 6	61,1 ± 5
BMI (kg/m²)	29,2 ± 4,1	28,4 ± 3,4
HbA1c (mmol/mol)	32,9 ± 3,9	50,1 ± 7,9
FBG (mmol/L)	5,4 ± 0,4	9,1 ± 2,4
Fasting Insulin (pmol/L)	85,1 ± 44	106 ± 57
M-value (μmol·kg⁻¹·min⁻¹)	53,5 ± 18	27,5 ± 14
