# Supplementary material for: Plasma Proteomics Identifies Insulin Resistance Signatures Predictive of Cardiometabolic Disease Risk
Source: Research Square preprint supplement (doi:10.21203/rs.3.rs-8585654/v1), 2026-01-21
Supplement: Supplementary file 6 [file Supplementary_Table_03.xlsx]

## Sheet: Sheet1
Protein_ID	Gene_ID	logFC	P.Value	adj.P.Val	Workflow
Q15848	ADIPOQ	0.0325146	2.53578e-11	3.82142e-08	Neat
P55290	CDH13	0.0143716	2.48306e-08	3.84129e-05	PCA
Q9Y6F8	CDY1	-0.0654607	7.9928e-08	6.02258e-05	Neat
Q99795	GPA33	0.0632443	2.55802e-07	0.00132081	Olink
Q99988	GDF15	-0.028878	4.87383e-07	0.00132081	Olink
Q86VB7	CD163	-0.0225099	5.73094e-07	0.000700321	Depleted
P33151	CDH5	0.0154142	5.98362e-07	0.000462833	PCA
P05090	APOD	0.0135021	1.23852e-06	0.000622151	Neat
P22692	IGFBP4	-0.0301553	1.24918e-06	0.00367383	MagNet
Q6UXC1	MAMDC4	-0.0358697	2.81485e-06	0.00450712	Olink
Q96ID5	IGSF21	0.0185957	3.32629e-06	0.00450712	Olink
P58166	INHBE	-0.0308239	3.79367e-06	0.0055786	MagNet
Q9P2J2	IGSF9	-0.0365854	4.59973e-06	0.00483078	Olink
Q96I82	KAZALD1	0.0288809	6.03992e-06	0.00483078	Olink
P16422	EPCAM	0.0361394	6.23902e-06	0.00483078	Olink
P58335	ANTXR2	0.0207996	6.34085e-06	0.00238891	Neat
P18510	IL1RN	-0.020233	9.1783e-06	0.00566549	Olink
P01308	INS-CPEPTIDE	-0.042888	9.40764e-06	0.00566549	Olink
P08581	MET	0.0115237	1.2454e-05	0.00880923	Depleted
Q13790	APOF	0.0133547	1.26933e-05	0.00382576	Neat
Q6ZUX3	TOGARAM2	-0.0179534	1.41708e-05	0.00768056	Olink
Q9UKU6	TRHDE	-0.0247305	1.80221e-05	0.00880923	Depleted
P08294	SOD3	0.0179887	1.9993e-05	0.00502156	Neat
P06858	LPL	0.0240555	2.23392e-05	0.0164249	MagNet
P01857	IGHG1	-0.0232551	2.55872e-05	0.0104225	Depleted
P19075	TSPAN8	0.0348993	3.14546e-05	0.0154985	Olink
Q8N3T6	TMEM132C	0.0121437	3.76867e-05	0.012047	Depleted
P55056	APOC4	-0.0285191	3.94338e-05	0.012047	Depleted
P30530	AXL	0.0138525	4.62871e-05	0.0179015	PCA
P55103	INHBC	-0.0203931	4.81222e-05	0.0283055	MagNet
P00740	F9	-0.00903756	5.06381e-05	0.013751	Depleted
P02768	ALB	-0.0201298	6.52127e-05	0.0145104	Depleted
A0A0C4DH72	IGKV1-6	-0.0300716	6.79265e-05	0.0145104	Depleted
O14960	LECT2	-0.0154389	7.12456e-05	0.0145104	Depleted
Q15166	PON3	0.0159282	7.27937e-05	0.0137125	Neat
Q14956	GPNMB	0.0122772	7.63222e-05	0.0196784	PCA
P55291	CDH15	-0.0335355	7.93086e-05	0.0326013	Olink
Q63HQ2	EGFLAM	0.01576	8.42101e-05	0.0326013	Olink
Q9BYE9	CDHR2	-0.0213956	9.24281e-05	0.0333974	Olink
P18065	IGFBP2	0.023176	9.5644e-05	0.0160151	Neat
Q93070	ART4	-0.0149298	9.75345e-05	0.0215551	PCA
Q6UXH0	ANGPTL8	-0.0252337	0.000111804	0.0210191	Depleted
P0DP07	IGHV4-31	0.111159	0.000129075	0.0233256	PCA
P07195	LDHB	0.00723798	0.000135288	0.0236175	Depleted
A8MVW5	HEPACAM2	0.0192877	0.000135701	0.0233256	PCA
Q8IZP9	ADGRG2	0.0159818	0.000166962	0.025829	PCA
P51161	FABP6	0.0308515	0.000208617	0.0315793	Depleted
P02766	TTR	-0.0102686	0.000217961	0.0315793	Depleted
P07339	CTSD	-0.0139709	0.00022435	0.0315793	Depleted
P32004	L1CAM	0.012525	0.000249137	0.0338676	PCA
P43121	MCAM	0.0103265	0.000262709	0.0338676	PCA
P01024	C3	-0.0090595	0.000288771	0.0352207	Depleted
P23141	CES1	-0.0183278	0.000295378	0.0352207	Depleted
P04004	VTN	-0.0102989	0.000308347	0.0389398	Neat
Q9H6X2	ANTXR1	0.0215588	0.000310071	0.0389398	Neat
O75882	ATRN	-0.0073001	0.000313364	0.0352207	Depleted
P04217	A1BG	-0.00829792	0.000317044	0.0352207	Depleted
Q7Z4G4	TRMT11	-0.0122189	0.000342524	0.0363968	Depleted
P98160	HSPG2	0.0109696	0.000395677	0.0425918	Neat
P16083	NQO2	0.0310135	0.000401058	0.0389232	Depleted
Q02952	AKAP12	0.0146653	0.000414076	0.0389232	Depleted
Q99983	OMD	0.0136086	0.00049084	0.0432951	Depleted
