# Supplementary material for: Plasma Proteomics Identifies Insulin Resistance Signatures Predictive of Cardiometabolic Disease Risk
Source: Research Square preprint supplement (doi:10.21203/rs.3.rs-8585654/v1), 2026-01-21
Supplement: Supplementary file 10 [file Supplementary_Table_04.xlsx]

## Sheet: Sheet1
Protein_ID	Gene_ID	logFC	P.Value	adj.P.Val	Workflow
F8WCM5	INS-IGF2	1.77606	5.17382e-23	8.00389e-20	PCA
Q99972	MYOC	-0.775827	2.11836e-14	1.14815e-10	Olink
P01308	INS-CPEPTIDE	-0.781584	2.4727e-13	6.70101e-10	Olink
P13725	OSM	0.676442	5.26689e-11	7.91865e-08	Olink
O75995	SASH3	-0.311458	5.84402e-11	7.91865e-08	Olink
P49771	FLT3LG	-0.225487	2.33836e-10	2.53478e-07	Olink
Q6UWN8	SPINK6	0.300388	9.31136e-10	8.41127e-07	Olink
P12872	MLN	-0.573471	1.63471e-09	1.26573e-06	Olink
Q9H4D0	CLSTN2	-0.21998	2.40899e-09	1.63209e-06	Olink
P14780	MMP9	0.532144	9.08486e-09	5.47111e-06	Olink
Q09666	AHNAK	-0.265172	1.61276e-08	8.74117e-06	Olink
P05981	HPN	0.441296	2.37517e-08	5.05711e-05	Depleted
P01275	GCG	-0.545429	2.43812e-08	1.15192e-05	Olink
P41218	MNDA	0.543811	2.55037e-08	1.15192e-05	Olink
P52943	CRIP2	-0.355188	4.50565e-08	1.87851e-05	Olink
P02647	APOA1	0.323025	5.3021e-08	4.10118e-05	PCA
P78380	OLR1	0.29348	7.09166e-08	2.74549e-05	Olink
P05937	CALB1	0.280722	1.17179e-07	4.23405e-05	Olink
P08254	MMP3	-0.385921	1.19002e-07	9.69474e-05	Depleted
P49023	PXN	-0.269904	1.2513e-07	4.23879e-05	Olink
Q8N699	MYCT1	-0.527017	1.97599e-07	0.000120733	Depleted
O95822	MLYCD	0.437804	2.55334e-07	0.000124807	Depleted
Q13201	MMRN1	0.415653	3.50596e-07	0.000142809	Depleted
P17213	BPI	0.455998	3.75292e-07	0.000119652	Olink
Q7Z4G4	TRMT11	0.194107	7.53555e-07	0.000204863	Depleted
P20160	AZU1	0.382035	8.21754e-07	0.000204863	Depleted
Q9BPZ7	MAPKAP1	0.345508	8.97615e-07	0.000204863	Depleted
P02788	LTF	0.221836	9.0471e-07	0.000204863	Depleted
P09105	HBQ1	0.417095	9.1873e-07	0.00027664	Olink
P40121	CAPG	-0.350022	9.22052e-07	0.000204863	Depleted
Q01469	FABP5	-0.277487	1.12128e-06	0.000319859	Olink
Q9UGI8	TES	-0.253025	1.51428e-06	0.000395605	Olink
Q9BW30	TPPP3	-0.500964	1.53279e-06	0.000395605	Olink
Q6UWL2	SUSD1	-0.307448	3.22333e-06	0.000794112	Olink
Q02818	NUCB1	-0.188078	3.26761e-06	0.000665503	Depleted
Q8IV48	ERI1	-0.25657	3.80392e-06	0.000843787	Olink
O43570	CA12	-0.164972	3.8436e-06	0.000843787	Olink
O14788	TNFSF11	-0.267901	3.96998e-06	0.000843787	Olink
P56279	TCL1A	-0.431679	4.18942e-06	0.000843787	Olink
P01024	C3	0.24916	4.20336e-06	0.000843787	Olink
Q8IVM0	CCDC50	-0.209195	4.95051e-06	0.000958277	Olink
P07996	THBS1	0.400044	5.18242e-06	0.000974294	Depleted
P31947	SFN	0.877146	5.19297e-06	0.00267784	PCA
P35612	ADD2	0.33145	5.48758e-06	0.00102561	Olink
P49747	COMP	-0.224669	5.49983e-06	0.00828824	Neat
O60711	LPXN	-0.172518	5.80318e-06	0.00104844	Olink
O43827	ANGPTL7	-0.256612	5.92235e-06	0.000985874	Depleted
O75531	BANF1	-0.3349	6.05078e-06	0.000985874	Depleted
P32455	GBP1	-0.253936	6.74593e-06	0.00117945	Olink
P49591	SARS1	-0.267231	6.85554e-06	0.00104718	Depleted
P01222	TSHB	-0.38402	7.9751e-06	0.00135078	Olink
P02730	SLC4A1	0.473453	8.93526e-06	0.0131393	MagNet
Q15389	ANGPT1	0.404702	9.14578e-06	0.00150212	Olink
P51693	APLP1	0.209172	9.2487e-06	0.00132964	Depleted
P55789	GFER	-0.276827	9.87415e-06	0.00157406	Olink
P35443	THBS4	-0.220357	1.1778e-05	0.00887476	Neat
Q96AT1	KIAA1143	-0.282607	1.3044e-05	0.00201995	Olink
P08397	HMBS	0.233541	1.62149e-05	0.00237526	Olink
Q8IY31	IFT20	-0.309184	1.78186e-05	0.00254149	Olink
P02766	TTR	0.136096	1.85925e-05	0.00252445	Depleted
O43474	KLF4	-0.376851	1.86508e-05	0.00259199	Olink
P22894	MMP8	0.313833	1.99043e-05	0.00269703	Olink
P35579	MYH9	0.192388	1.99731e-05	0.00256917	Depleted
Q96SL1	SLC49A4	0.361859	2.40467e-05	0.0029385	Depleted
P00488	F13A1	0.812744	2.72713e-05	0.0105472	PCA
Q8WV28	BLNK	-0.200329	2.82253e-05	0.00364058	Olink
Q15797	SMAD1	-0.448909	2.87178e-05	0.00364058	Olink
P63313	TMSB10	-0.31544	2.88829e-05	0.00364058	Olink
P11166	SLC2A1	0.406081	3.1761e-05	0.0188172	MagNet
O60476	MAN1A2	0.117634	3.24187e-05	0.00377292	Depleted
P16452	EPB42	0.492016	3.25916e-05	0.0188172	MagNet
P10082	PYY	-0.527188	3.27789e-05	0.00402471	Olink
P02549	SPTA1	0.423895	3.29273e-05	0.0188172	MagNet
P37108	SRP14	-0.2254	3.34155e-05	0.00402471	Olink
O14498	ISLR	-0.211804	3.35894e-05	0.0168731	Neat
Q9BY32	ITPA	-0.411762	3.56695e-05	0.0042028	Olink
P47712	PLA2G4A	-0.318716	3.86558e-05	0.00438807	Olink
P29536	LMOD1	-0.23007	3.88611e-05	0.00438807	Olink
P49795	RGS19	-0.368007	4.04138e-05	0.0188172	MagNet
P20062	TCN2	0.17043	4.04177e-05	0.00449004	Depleted
Q16619	CTF1	-0.193164	4.07479e-05	0.00444729	Olink
O60437	PPL	-0.221546	4.16301e-05	0.00444729	Olink
Q8IVF2	AHNAK2	-0.196824	4.18472e-05	0.00444729	Olink
P42765	ACAA2	-0.414374	4.47876e-05	0.0188172	MagNet
Q14766	LTBP1	0.25112	4.84499e-05	0.00505715	Depleted
P27348	YWHAQ	-0.221944	4.96611e-05	0.00505715	Depleted
P00915	CA1	0.497663	5.50033e-05	0.0190792	MagNet
P30838	ALDH3A1	-0.327422	5.747e-05	0.00594168	Olink
Q8NBR6	MINDY2	-0.176379	5.81013e-05	0.00594168	Olink
Q96DB9	FXYD5	-0.293535	6.17957e-05	0.00620246	Olink
Q7L9L4	MOB1B	-0.307236	6.25896e-05	0.00611875	Depleted
Q8N183	NDUFAF2	-0.321716	6.32083e-05	0.00622889	Olink
P05067	APP	0.207427	6.43414e-05	0.0190792	MagNet
P10124	SRGN	0.243935	6.48733e-05	0.0190792	MagNet
Q9UPW0	FOXJ3	-0.319209	6.58131e-05	0.00636977	Olink
P81605	DCD	0.425039	7.24072e-05	0.00644335	Depleted
Q53T59	HS1BP3	-0.283084	7.30797e-05	0.00694898	Olink
P02654	APOC1	0.29586	7.36226e-05	0.0227788	PCA
Q12849	GRSF1	-0.313671	7.57976e-05	0.00708316	Olink
P08865	RPSA	-0.319904	7.60228e-05	0.00644335	Depleted
P98066	TNFAIP6	0.448111	7.88554e-05	0.00644335	Depleted
O75351	VPS4B	-0.324335	7.95294e-05	0.00644335	Depleted
O14514	ADGRB1	0.157042	8.47147e-05	0.00772862	Olink
Q6NXS1	PPP1R2B	-0.320301	8.55567e-05	0.00772862	Olink
Q9UEE5	STK17A	-0.209338	8.5939e-05	0.00644335	Depleted
P02144	MB	0.229966	8.67403e-05	0.00644335	Depleted
P29122	PCSK6	0.382569	8.73758e-05	0.00644335	Depleted
O14787	TNPO2	-0.240555	8.75742e-05	0.0216889	MagNet
Q06124	PTPN11	-0.238608	8.84432e-05	0.00644335	Depleted
P14543	NID1	0.0963065	8.96374e-05	0.00644335	Depleted
P23284	PPIB	-0.282004	9.07986e-05	0.0342084	Neat
O75339	CILP	-0.142324	9.23862e-05	0.00645119	Depleted
Q9UMR2	DDX19B	-0.34159	9.62783e-05	0.00855456	Olink
Q96CG8	CTHRC1	-0.167178	9.90805e-05	0.00866155	Olink
Q99426	TBCB	-0.254366	0.000106313	0.00699186	Depleted
O43310	CTIF	-0.362402	0.000108252	0.00929289	Olink
Q01970	PLCB3	-0.239854	0.000109447	0.00699186	Depleted
P49916	LIG3	-0.27537	0.000109732	0.00929289	Olink
P55212	CASP6	-0.318351	0.000111483	0.00699186	Depleted
Q13442	PDAP1	-0.260215	0.000111572	0.00699186	Depleted
P23511	NFYA	-0.589469	0.000116494	0.00971383	Olink
Q8IXQ3	C9orf40	0.473212	0.000122181	0.0100336	Olink
P69891	HBG1	0.444554	0.000123018	0.0273549	MagNet
P16035	TIMP2	-0.232924	0.000125674	0.0348432	Neat
Q96A19	CCDC102A	-0.306313	0.000127083	0.0102804	Olink
P05109	S100A8	0.30702	0.000128515	0.0280291	PCA
Q16653	MOG	0.138192	0.000129651	0.010334	Olink
Q6B0B8	TIGD3	-0.423986	0.000130217	0.0273549	MagNet
Q9NQ76	MEPE	-0.266414	0.000132417	0.00809065	Depleted
P58546	MTPN	-0.39801	0.00014092	0.0280291	PCA
Q6ZT62	BARGIN	-0.272899	0.000148043	0.0116289	Olink
Q92932	PTPRN2	0.133795	0.000151975	0.0117672	Olink
P02452	COL1A1	-0.329062	0.000154266	0.0348432	Neat
Q9Y2Z0	SUGT1	-0.283615	0.000155484	0.0118096	Olink
Q64LD2	WDR25	-0.539262	0.00015688	0.0118096	Olink
Q96EQ0	SGTB	-0.349701	0.000160595	0.00945615	Depleted
O60934	NBN	-0.251915	0.000161084	0.01196	Olink
Q04721	NOTCH2	-0.174978	0.000161846	0.0348432	Neat
P54819	AK2	-0.190353	0.000162503	0.00945615	Depleted
Q16775	HAGH	0.376143	0.000164261	0.01197	Olink
P14210	HGF	0.141841	0.000165637	0.01197	Olink
Q86WV1	SKAP1	-0.232593	0.000170338	0.0120878	Olink
Q9NYB0	TERF2IP	-0.290651	0.000171727	0.0120878	Olink
P05408	SCG5	0.183516	0.000177074	0.0280291	PCA
O60664	PLIN3	-0.13436	0.000178232	0.0101302	Depleted
P02649	APOE	0.413763	0.000185853	0.0280291	PCA
P08727	KRT19	-0.242072	0.000188209	0.0130781	Olink
P10645	CHGA	0.154036	0.000193656	0.0280291	PCA
O00154	ACOT7	-0.215144	0.000193737	0.0107612	Depleted
Q32MZ4	LRRFIP1	-0.223036	0.000196583	0.0359328	MagNet
Q9UKM7	MAN1B1	0.33963	0.000202618	0.0359328	MagNet
Q14012	CAMK1	-0.231003	0.000218649	0.0118751	Depleted
P00918	CA2	0.310832	0.000218809	0.0359328	MagNet
Q03426	MVK	-0.256688	0.000220543	0.0151221	Olink
Q9UJC5	SH3BGRL2	-0.419399	0.000222412	0.0418968	Neat
Q9ULR5	PAIP2B	-0.253328	0.000223204	0.0151221	Olink
Q13459	MYO9B	-0.20974	0.000226196	0.0359328	MagNet
P00338	LDHA	-0.106113	0.00022686	0.0120532	Depleted
P05089	ARG1	0.278266	0.000228207	0.0152702	Olink
Q15629	TRAM1	-0.31708	0.00023214	0.0359328	MagNet
P08670	VIM	-0.261017	0.000233267	0.0280291	PCA
Q9BRP4	PAAF1	-0.873402	0.000233539	0.012144	Depleted
O15240	VGF	0.158578	0.000233986	0.0154659	Olink
Q8N1F7	NUP93	0.314924	0.000234916	0.0280291	PCA
Q07021	C1QBP	-0.346639	0.000235539	0.0280291	PCA
Q9Y5P6	GMPPB	-0.289649	0.000239037	0.012171	Depleted
P07108	DBI	-0.174722	0.00024267	0.0158466	Olink
Q9H910	JPT2	-0.289334	0.000247317	0.0159578	Olink
O00273	DFFA	-0.235601	0.000250996	0.0160047	Olink
P13611	VCAN	0.153078	0.000252332	0.0125857	Depleted
P58417	NXPH1	0.139855	0.000255096	0.016077	Olink
O75368	SH3BGRL	-0.167589	0.000261771	0.0127954	Depleted
O60883	GPR37L1	0.242735	0.000267781	0.0295898	PCA
O94900	TOX	-0.21852	0.000269601	0.0167066	Olink
Q9H8Y5	ANKZF1	-0.239099	0.00027125	0.0167066	Olink
P38606	ATP6V1A	-0.177759	0.000273188	0.0130916	Depleted
P02042	HBD	0.441265	0.000276729	0.040693	MagNet
O60869	EDF1	-0.277834	0.000277362	0.016891	Olink
Q9P1F3	ABRACL	-0.391379	0.00028052	0.0469716	Neat
O60239	SH3BP5	-0.372722	0.000281475	0.0169511	Olink
P08238	HSP90AB1	-0.15728	0.000281599	0.0132351	Depleted
Q9ULI1	NWD2	0.213176	0.000294452	0.0135781	Depleted
Q99685	MGLL	-0.196136	0.000300373	0.0135947	Depleted
P42331	ARHGAP25	-0.238712	0.000302194	0.0176177	Olink
P50548	ERF	-0.206686	0.000302297	0.0176177	Olink
P69905	HBA2	0.376963	0.000303266	0.0424717	MagNet
Q9BUT1	BDH2	-0.238717	0.000312408	0.0177714	Olink
O00425	IGF2BP3	-0.315124	0.000314178	0.0177714	Olink
A6NK89	RASSF10	-0.269577	0.000315804	0.0177714	Olink
P23515	OMG	0.258424	0.000318048	0.0177714	Olink
P04183	TK1	-0.549835	0.000327378	0.018106	Olink
Q15642	TRIP10	-0.200454	0.000328701	0.0146063	Depleted
A0A024R1R8	TMA7B	-0.244017	0.000330025	0.0340366	PCA
O95613	PCNT	-0.312922	0.000335081	0.0182763	Olink
O43521	BCL2L11	0.318549	0.000337202	0.0182763	Olink
Q9UK53	ING1	-0.234174	0.00034298	0.0184055	Olink
P68871	HBB	0.380325	0.000354266	0.0469023	MagNet
Q9NVZ3	NECAP2	-0.321133	0.000356894	0.0189111	Olink
Q9Y2Y0	ARL2BP	-0.250672	0.000359382	0.0189111	Olink
P62820	RAB1A	-0.186909	0.000359755	0.0157007	Depleted
Q9UHX3	ADGRE2	-0.172022	0.000365135	0.0190291	Olink
Q4V328	GRIPAP1	-0.184583	0.000366798	0.0469023	MagNet
A6NCF6	MAGEA13P	-0.248093	0.000370632	0.0191317	Olink
Q9UKV8	AGO2	0.393966	0.000376491	0.0161429	Depleted
Q8N283	ANKRD35	-0.241309	0.000386326	0.0197536	Olink
Q15365	PCBP1	-0.204803	0.0003932	0.0165686	Depleted
Q9UJ68	MSRA	-0.220703	0.000414386	0.0209904	Olink
P20962	PTMS	-0.222284	0.000415986	0.0395132	PCA
O00141	SGK1	0.720266	0.000421004	0.0211282	Olink
Q15843	NEDD8	-0.253512	0.000427932	0.0177265	Depleted
Q9BZ67	FRMD8	-0.371463	0.000432186	0.0213955	Olink
O43665	RGS10	-0.35871	0.000434226	0.0213955	Olink
Q8N6P7	IL22RA1	-0.228762	0.000439142	0.0214428	Olink
P61960	UFM1	-0.193515	0.000457491	0.0180903	Depleted
P62873	GNB1	-0.191381	0.000458919	0.0180903	Depleted
Q96GE6	CALML4	-0.137364	0.00046263	0.0220096	Olink
Q96CP2	FLYWCH2	-0.264676	0.000462932	0.0220096	Olink
P21964	COMT	-0.217168	0.000473154	0.0223	Olink
Q96C23	GALM	-0.221495	0.000479512	0.0185042	Depleted
P35241	RDX	-0.114342	0.000484562	0.0185042	Depleted
Q9H074	PAIP1	-0.217629	0.00050442	0.023493	Olink
Q9NZT2	OGFR	-0.140317	0.000507138	0.023493	Olink
Q8IWE2	FAM114A1	-0.15623	0.000513236	0.0235741	Olink
P62330	ARF6	-0.268852	0.000517137	0.0194051	Depleted
Q86Y97	KMT5C	0.403838	0.000520524	0.0447361	PCA
Q99102	MUC4	0.5663	0.000527578	0.0194051	Depleted
Q9NWZ3	IRAK4	-0.263543	0.000538419	0.024523	Olink
P17612	PRKACA	-0.221766	0.000539292	0.0194051	Depleted
P05771	PRKCB	-0.213279	0.000539914	0.0194051	Depleted
Q96AX2	RAB37	-0.262389	0.000566755	0.0255984	Olink
P06729	CD2	-0.502307	0.000584774	0.025956	Olink
P98179	RBM3	-0.272984	0.000588036	0.025956	Olink
Q9H777	ELAC1	-0.224723	0.000589038	0.025956	Olink
P48059	LIMS1	-0.264072	0.000603021	0.0209253	Depleted
P07900	HSP90AA1	-0.15435	0.000607897	0.0209253	Depleted
Q9BUN5	CCDC28B	-0.26253	0.000615777	0.0265886	Olink
Q6ZVX7	NCCRP1	-0.140036	0.000616293	0.0265886	Olink
Q9Y4C0	NRXN3	0.203295	0.000619463	0.0210273	Depleted
O14933	UBE2L6	-0.221104	0.000621712	0.0265886	Olink
Q12982	BNIP2	-0.22216	0.000623814	0.0265886	Olink
Q9Y450	HBS1L	-0.280579	0.000627923	0.0265886	Olink
Q9Y4G6	TLN2	0.17479	0.000638535	0.0211958	Depleted
Q99715	COL12A1	-0.121597	0.000647098	0.0211958	Depleted
Q9NVG8	TBC1D13	-0.252547	0.000667596	0.0211958	Depleted
Q9UBU3	GHRL	-0.257013	0.000670997	0.0279931	Olink
P01270	PTH	-0.27096	0.000671421	0.0279931	Olink
P26038	MSN	-0.121795	0.000673231	0.0211958	Depleted
P01137	TGFB1	0.199226	0.000678303	0.0211958	Depleted
Q8N5S9	CAMKK1	-0.20944	0.000684423	0.0283174	Olink
P49593	PPM1F	-0.194872	0.00068762	0.0211958	Depleted
Q9Y5L0	TNPO3	0.148495	0.000690424	0.0211958	Depleted
O95881	TXNDC12	-0.223903	0.000693807	0.0211958	Depleted
Q96N16	JAKMIP1	-0.256815	0.000705601	0.0289724	Olink
O95232	LUC7L3	-0.20806	0.000713417	0.0290731	Olink
P08833	IGFBP1	-0.319981	0.000719621	0.0291071	Olink
P0DMM9	SULT1A3	-0.276299	0.000732601	0.0220347	Depleted
P07237	P4HB	-0.0695551	0.000748313	0.0220347	Depleted
Q15256	PTPRR	0.119015	0.000754664	0.0298044	Olink
O60268	KIAA0513	-0.312421	0.000758638	0.0298044	Olink
Q76M96	CCDC80	-0.176115	0.000769468	0.0298044	Olink
Q15056	EIF4H	-0.196671	0.00077084	0.0298044	Olink
Q6NYC8	PPP1R18	-0.120576	0.000771176	0.0298044	Olink
Q01995	TAGLN	-0.252132	0.000773155	0.0223621	Depleted
P45984	MAPK9	-0.118026	0.000775354	0.0298044	Olink
O00299	CLIC1	-0.170787	0.000777732	0.0223621	Depleted
Q8NC67	NETO2	0.958019	0.000783978	0.0299237	Olink
Q6ZUM4	ARHGAP27	-0.119226	0.000798863	0.0301947	Olink
Q15366	PCBP2	-0.252098	0.000802221	0.0301947	Olink
P14618	PKM	-0.15366	0.000818475	0.0230725	Depleted
P48960	ADGRE5	-0.154139	0.000826382	0.0230725	Depleted
P60520	GABARAPL2	-0.201889	0.000830763	0.0230725	Depleted
Q9Y5V3	MAGED1	-0.281419	0.000837477	0.0308094	Olink
Q93015	NAA80	-0.32357	0.000837774	0.0308094	Olink
Q8TF30	WHAMM	-0.262931	0.00084036	0.0308094	Olink
Q8ND71	GIMAP8	-0.184595	0.000841289	0.0308094	Olink
P29323	EPHB2	-0.135581	0.000849506	0.023328	Depleted
Q9Y3R5	DOP1B	-0.746213	0.00085823	0.0312188	Olink
Q15746	MYLK	-0.203494	0.00086147	0.0233937	Depleted
P27695	APEX1	-0.215856	0.000881168	0.0318395	Olink
Q96MC5	BMERB1	-0.137517	0.000896199	0.0321682	Olink
A6NFN3	RBFOX3	-0.144426	0.000943373	0.0335545	Olink
Q16543	CDC37	-0.18041	0.000953382	0.0253773	Depleted
P09769	FGR	-0.203027	0.000958716	0.0337418	Olink
P62136	PPP1CA	-0.180034	0.000962783	0.0253773	Depleted
E9PAV3	NACA	-0.266807	0.000965668	0.0253773	Depleted
Q9Y6D9	MAD1L1	-0.125011	0.000977367	0.0341763	Olink
P30044	PRDX5	-0.191789	0.00100762	0.0261981	Depleted
P55210	CASP7	-0.284383	0.00102018	0.035219	Olink
P23381	WARS1	-0.115898	0.00102418	0.0263484	Depleted
P07711	CTSL	0.140306	0.00103971	0.0264693	Depleted
Q8WX93	PALLD	-0.668974	0.00104178	0.0355123	Olink
Q9NRG1	PRTFDC1	-0.288301	0.00105407	0.0355328	Olink
P09543	CNP	-0.207158	0.00106093	0.0355328	Olink
Q8WUX2	CHAC2	-0.193166	0.00106205	0.0355328	Olink
Q14141	SEPTIN6	-0.272684	0.00108549	0.02707	Depleted
Q8WUM4	PDCD6IP	-0.135165	0.00109276	0.02707	Depleted
P25116	F2R	-0.166672	0.001096	0.0362214	Olink
P04080	CSTB	-0.169651	0.00109653	0.02707	Depleted
Q6GQQ9	OTUD7B	-0.21388	0.00110419	0.0362711	Olink
P61160	ACTR2	-0.182847	0.00112236	0.0271492	Depleted
P20718	GZMH	-0.239348	0.0011272	0.0368037	Olink
Q9BX10	GTPBP2	-0.350095	0.00113233	0.0271492	Depleted
O75436	VPS26A	-0.212023	0.00113307	0.0271492	Depleted
O43155	FLRT2	-0.130813	0.00116825	0.0379158	Olink
P62942	FKBP1A	-0.140946	0.0011709	0.0277832	Depleted
O60749	SNX2	-0.258277	0.00119508	0.0385555	Olink
P15121	AKR1B1	-0.208902	0.00121141	0.0386296	Olink
P99999	CYCS	-0.125278	0.00121571	0.028156	Depleted
Q9Y3C0	WASHC3	-0.262687	0.00122594	0.0386296	Olink
P08134	RHOC	-0.22351	0.00122728	0.0386296	Olink
Q9UBM4	OPTC	0.154252	0.0012323	0.0386296	Olink
P54577	YARS1	-0.310083	0.00123301	0.0386296	Olink
P78417	GSTO1	-0.117652	0.0012333	0.0281701	Depleted
P30040	ERP29	-0.206263	0.00124793	0.0282401	Depleted
P21579	SYT1	0.146829	0.00125416	0.0387204	Olink
O96013	PAK4	-0.278645	0.00125434	0.0387204	Olink
Q9HD42	CHMP1A	-0.205709	0.00126521	0.0387204	Olink
Q6P1M0	SLC27A4	-0.252449	0.00127155	0.0387204	Olink
Q6PGN9	PSRC1	-0.224266	0.00127163	0.0387204	Olink
Q13177	PAK2	-0.141245	0.00128139	0.0283881	Depleted
Q59EK9	RUNDC3A	0.0997571	0.00128338	0.0283881	Depleted
P06744	GPI	-0.127312	0.00128952	0.0283881	Depleted
P01298	PPY	-0.253915	0.00129241	0.0387892	Olink
P21980	TGM2	0.342151	0.00129307	0.0387892	Olink
Q9H0P0	NT5C3A	-0.230864	0.00129536	0.0387892	Olink
Q99969	RARRES2	0.101361	0.00130338	0.0283881	Depleted
Q14241	ELOA	-0.200025	0.00130501	0.0388635	Olink
P12081	HARS1	-0.164189	0.00133265	0.0283881	Depleted
P17252	PRKCA	-0.190397	0.00133298	0.0283881	Depleted
O43639	NCK2	-0.213383	0.00133578	0.0283881	Depleted
Q15691	MAPRE1	-0.17995	0.00134867	0.028415	Depleted
Q8WV41	SNX33	-0.150233	0.00135473	0.0399406	Olink
O15182	CETN3	-0.212932	0.00135592	0.0399406	Olink
O95498	VNN2	0.137393	0.00136998	0.0401368	Olink
P12277	CKB	-0.360437	0.00137318	0.0286842	Depleted
Q96RU3	FNBP1	-0.137753	0.00139093	0.0403748	Olink
Q15126	PMVK	-0.194209	0.00139452	0.0403748	Olink
P12724	RNASE3	0.388128	0.00141263	0.0403748	Olink
O43715	TRIAP1	-0.154519	0.00141592	0.0403748	Olink
Q8TCT1	PHOSPHO1	-0.112172	0.00142315	0.0403748	Olink
P31751	AKT2	-0.417818	0.00142794	0.0403748	Olink
P41222	PTGDS	0.098542	0.0014302	0.0295149	Depleted
Q9BTK6	PAGR1	-0.15202	0.00143025	0.0403748	Olink
P54922	ADPRH	-0.210156	0.0014371	0.0295149	Depleted
O43768	ENSA	-0.258499	0.00144718	0.040641	Olink
Q01581	HMGCS1	-0.296481	0.00145673	0.0406884	Olink
P26639	TARS1	-0.165878	0.00145797	0.0296362	Depleted
Q9NS18	GLRX2	-0.181272	0.00146388	0.0406884	Olink
P13639	EEF2	-0.145315	0.00147557	0.0296362	Depleted
P20338	RAB4A	-0.351146	0.00147939	0.0296362	Depleted
O75054	IGSF3	-0.148658	0.00149162	0.0412478	Olink
P78371	CCT2	-0.178929	0.00150391	0.0297706	Depleted
Q9NRW1	RAB6B	-0.198448	0.00151045	0.0297706	Depleted
Q96IU4	ABHD14B	-0.170524	0.00153254	0.0299642	Depleted
Q86UU1	PHLDB1	-0.179219	0.00153993	0.042242	Olink
Q96G28	CFAP36	-0.216203	0.00154316	0.042242	Olink
Q96S90	LYSMD1	-0.312447	0.00156642	0.0426632	Olink
Q15084	PDIA6	-0.190135	0.00157471	0.0305443	Depleted
O00487	PSMD14	-0.198846	0.00158821	0.0305637	Depleted
Q8WUF8	FAM172A	-0.195947	0.00160244	0.0431436	Olink
Q9Y5W5	WIF1	-0.112689	0.0016079	0.0431436	Olink
Q8IXJ6	SIRT2	-0.251643	0.00161839	0.0431612	Olink
Q86T90	KIAA1328	0.169953	0.00162326	0.0307038	Depleted
Q7Z739	YTHDF3	-0.264293	0.00162452	0.0431612	Olink
P61981	YWHAG	-0.16319	0.00163413	0.0307038	Depleted
P69892	HBG2	0.745861	0.0016388	0.0432029	Olink
Q9UMY4	SNX12	-0.200299	0.00163974	0.0307038	Depleted
Q9NQW7	XPNPEP1	-0.16968	0.00164574	0.0307038	Depleted
P56159	GFRA1	-0.0941068	0.00164787	0.0432029	Olink
Q7Z4V5	HDGFL2	-0.170299	0.00165843	0.0432029	Olink
P31997	CEACAM8	0.137878	0.00166996	0.0432029	Olink
Q96RJ3	TNFRSF13C	-0.181628	0.00167757	0.0432029	Olink
P20827	EFNA1	0.147692	0.00168668	0.0432029	Olink
O14964	HGS	-0.277639	0.00168842	0.0432029	Olink
Q2M296	MTHFSD	-0.313575	0.00168985	0.0432029	Olink
P10301	RRAS	-0.483774	0.00171246	0.0433654	Olink
Q8TEA8	DTD1	-0.218679	0.00171981	0.0318425	Depleted
P50135	HNMT	-0.13874	0.00172021	0.0433654	Olink
P52209	PGD	-0.110033	0.00175112	0.0319383	Depleted
P07738	BPGM	0.268406	0.0017853	0.0323206	Depleted
Q9Y6A5	TACC3	-0.272117	0.0017939	0.0449208	Olink
P30740	SERPINB1	-0.142833	0.00180379	0.0324152	Depleted
Q6ZW13	C16orf86	-0.270078	0.0018045	0.0449208	Olink
P41240	CSK	-0.168535	0.00181815	0.0324348	Depleted
P36873	PPP1CC	-0.217354	0.00182157	0.0449208	Olink
Q9BUB5	MKNK1	-0.229171	0.001827	0.0449208	Olink
P16455	MGMT	-0.289177	0.00183295	0.0449208	Olink
P01135	TGFA	0.108362	0.00183666	0.0449208	Olink
Q13882	PTK6	0.103599	0.00184556	0.0326851	Depleted
Q7L8J4	SH3BP5L	-0.244122	0.00184558	0.0449208	Olink
Q9H227	GBA3	-0.31071	0.00184822	0.0449208	Olink
P61244	MAX	-0.293999	0.00185698	0.0449324	Olink
Q7LG56	RRM2B	-0.228145	0.00187952	0.0452756	Olink
Q06413	MEF2C	-0.345065	0.00188862	0.0452936	Olink
O43505	B4GAT1	0.0894916	0.00189909	0.0333912	Depleted
P06239	LCK	-0.233331	0.0019017	0.0454063	Olink
Q08499	PDE4D	0.149731	0.00191532	0.033436	Depleted
O00151	PDLIM1	-0.187004	0.00194869	0.033766	Depleted
P02787	TF	-0.488106	0.00196185	0.033766	Depleted
Q86UT8	CENATAC	-0.384761	0.00196759	0.0467734	Olink
P23229	ITGA6	-0.200401	0.00200083	0.0341959	Depleted
O95825	CRYZL1	-0.204472	0.00204286	0.0483507	Olink
Q3ZCW2	LGALSL	-0.178806	0.00205735	0.0348626	Depleted
P35813	PPM1A	-0.153693	0.00206836	0.0348626	Depleted
Q8IZD4	DCP1B	-0.166983	0.00207172	0.0488205	Olink
Q9NXV2	KCTD5	-0.134108	0.0020997	0.0490557	Olink
Q6V0I7	FAT4	-0.567748	0.00210095	0.0490557	Olink
P15941	MUC1	0.145641	0.00211595	0.0353107	Depleted
Q5SW96	LDLRAP1	-0.273765	0.00211906	0.0490557	Olink
P09486	SPARC	0.165124	0.00212442	0.0353107	Depleted
Q9BQA1	WDR77	0.538851	0.00212477	0.0490557	Olink
Q7Z5R6	APBB1IP	-0.117773	0.00212696	0.0490557	Olink
Q6UWK7	GPR15LG	0.211993	0.00213798	0.0491011	Olink
Q96KP4	CNDP2	-0.182308	0.00213829	0.0353107	Depleted
P11413	G6PD	-0.151445	0.00216026	0.035434	Depleted
Q8WZ82	OVCA2	-0.149752	0.00216835	0.0494432	Olink
Q9BU02	THTPA	-0.206618	0.00217248	0.0494432	Olink
Q8WW22	DNAJA4	0.285913	0.00218024	0.0494432	Olink
Q9Y2D5	AKAP2	-0.113154	0.00219795	0.0495432	Olink
Q9H223	EHD4	-0.192561	0.00220293	0.0495432	Olink
Q9Y696	CLIC4	-0.168493	0.0022845	0.0372222	Depleted
O75688	PPM1B	-0.321206	0.00230049	0.0372344	Depleted
P61764	STXBP1	0.217946	0.00233638	0.0375666	Depleted
P60981	DSTN	-0.207392	0.00237376	0.0379182	Depleted
P63098	PPP3R1	-0.227248	0.00242896	0.0381849	Depleted
P18669	PGAM1	-0.117071	0.00243405	0.0381849	Depleted
P98172	EFNB1	0.218757	0.00245174	0.0381849	Depleted
Q8IUK8	CBLN2	0.224547	0.00245296	0.0381849	Depleted
P60174	TPI1	-0.122316	0.00249998	0.0383437	Depleted
Q12931	TRAP1	-0.473234	0.00254484	0.0383437	Depleted
P14868	DARS1	-0.157419	0.00254772	0.0383437	Depleted
Q8N1I0	DOCK4	0.15927	0.00254824	0.0383437	Depleted
Q16610	ECM1	0.0915394	0.0025507	0.0383437	Depleted
P49368	CCT3	-0.18281	0.00255729	0.0383437	Depleted
Q8N5J2	MINDY1	-0.265043	0.0026102	0.0386677	Depleted
Q5JSH3	WDR44	-0.176107	0.00261054	0.0386677	Depleted
Q9H4M9	EHD1	-0.183112	0.00264573	0.038859	Depleted
Q9H4A4	RNPEP	-0.0974429	0.00265526	0.038859	Depleted
P21860	ERBB3	0.177756	0.00275688	0.0397607	Depleted
Q13094	LCP2	-0.180489	0.00275759	0.0397607	Depleted
P48643	CCT5	-0.161678	0.00277348	0.0397607	Depleted
Q5TDH0	DDI2	0.340924	0.0028485	0.0397607	Depleted
Q96SK3	ZNF607	0.258015	0.00285249	0.0397607	Depleted
P11216	PYGB	-0.200209	0.00285599	0.0397607	Depleted
P30273	FCER1G	-0.295423	0.00285739	0.0397607	Depleted
O95336	PGLS	-0.135912	0.00286254	0.0397607	Depleted
P14324	FDPS	-0.145627	0.00288311	0.0397607	Depleted
Q9UKY7	CDV3	-0.198526	0.00289583	0.0397607	Depleted
Q8N3T6	TMEM132C	0.0989101	0.00291728	0.0398314	Depleted
P16671	CD36	-0.173674	0.00295294	0.0400944	Depleted
Q70J99	UNC13D	-0.182564	0.00303204	0.040716	Depleted
P20851	C4BPB	0.0746555	0.00310865	0.0411288	Depleted
Q9BUL8	PDCD10	-0.133712	0.00311677	0.0411288	Depleted
P61019	RAB2A	-0.148299	0.00313186	0.0411288	Depleted
O75818	RPP40	0.388496	0.00314646	0.0411288	Depleted
Q92882	OSTF1	-0.192262	0.00314693	0.0411288	Depleted
O75131	CPNE3	-0.182212	0.0033276	0.0429086	Depleted
Q9H6X2	ANTXR1	-0.112031	0.003361	0.0429086	Depleted
P41250	GARS1	-0.174901	0.00336779	0.0429086	Depleted
P10599	TXN	-0.120059	0.00337147	0.0429086	Depleted
Q16531	DDB1	-0.139661	0.00340049	0.0429086	Depleted
P51149	RAB7A	-0.168811	0.003406	0.0429086	Depleted
Q92696	RABGGTA	-0.227221	0.00343471	0.0429535	Depleted
O43572	AKAP10	-0.260859	0.00344471	0.0429535	Depleted
P30043	BLVRB	0.30173	0.00346275	0.0429592	Depleted
Q00688	FKBP3	-0.170493	0.00349962	0.0431478	Depleted
P50552	VASP	-0.2305	0.00351326	0.0431478	Depleted
Q86UN2	RTN4RL1	-0.218223	0.0035769	0.0437098	Depleted
Q9H993	ARMT1	-0.319798	0.0036174	0.0439052	Depleted
P30085	CMPK1	-0.152412	0.00362882	0.0439052	Depleted
P25325	MPST	-0.183364	0.00368295	0.0443406	Depleted
P04632	CAPNS1	-0.129734	0.00373491	0.0447457	Depleted
Q92973	TNPO1	-0.277	0.00378191	0.0450878	Depleted
Q16539	MAPK14	-0.154198	0.00380488	0.0451414	Depleted
P19971	TYMP	-0.145154	0.00383236	0.0452478	Depleted
P01031	C5	0.0608656	0.00388088	0.0456003	Depleted
P07225	PROS1	0.0620754	0.00400699	0.0465408	Depleted
P31146	CORO1A	-0.126803	0.00401111	0.0465408	Depleted
O75083	WDR1	-0.148388	0.00402555	0.0465408	Depleted
O60234	GMFG	-0.220675	0.00403709	0.0465408	Depleted
P62937	PPIA	-0.118211	0.00406688	0.0466641	Depleted
P53618	COPB1	-0.236386	0.00410681	0.0467839	Depleted
P13929	ENO3	-0.441179	0.0041156	0.0467839	Depleted
Q9NZN3	EHD3	-0.172248	0.00423795	0.0479059	Depleted
Q9UNS2	COPS3	-0.230182	0.00425351	0.0479059	Depleted
Q96QK1	VPS35	-0.137992	0.00431018	0.048046	Depleted
Q15435	PPP1R7	-0.0979265	0.00431587	0.048046	Depleted
O60493	SNX3	-0.173868	0.00432493	0.048046	Depleted
P32119	PRDX2	0.279231	0.0043528	0.0480499	Depleted
Q7L099	RUFY3	0.409398	0.00440465	0.0482734	Depleted
Q9HB71	CACYBP	-0.173438	0.00456759	0.0498357	Depleted
