# Supplementary material for: Plasma Proteomics Identifies Insulin Resistance Signatures Predictive of Cardiometabolic Disease Risk
Source: Research Square preprint supplement (doi:10.21203/rs.3.rs-8585654/v1), 2026-01-21
Supplement: Supplementary file 14 [file Supplementary_Table_05.xlsx]

## Sheet: Sheet1
Tissue	m_positive Log2(OR)	m_negative Log2(OR)	m_all Log2(OR)	m_positive adj.P-value	m_negative adj.P-value	m_all adj.P-value
liver	1.6311	7.99167	6.05558	0.316813	8.22413e-44	2.23656e-39
kidney	2.09286	4.17282	3.71833	0.351557	2.37691e-07	1.00264e-07
pancreas	2.16987	2.77219	2.69494	0.308668	0.0065345	0.00168452
brain	2.14084	0.519487	0.930822	0.0242637	0.0253129	0.897326
intestine	1.40643	1.7619	1.68246	0.535258	0.0339051	0.0203128
adipose tissue	2.109	2.42925	2.41454	0.351557	0.0391793	0.0203128
lung	0.506544	2.45361	1.88089	1	0.0391793	0.146654
skeletal muscle	0.838061	0.429182	0.537366	1	0.0447813	0.0701603
retina	1.065	0.304022	0.509532	1	0.0889141	0.212271
tongue	1.45891	0.364371	0.660948	0.535258	0.109776	0.528794
urinary bladder	1.06915	1.78681	1.59312	0.940669	0.409686	0.33729
adrenal gland	1.45808	1.8065	1.7335	0.600922	0.411791	0.33729
gallbladder	7.48623	2.08197	3.91468	0.0277325	0.411791	0.0203128
lymphoid tissue	0.314956	1.26103	0.963974	0.0807335	0.411791	0.986386
skin	0.519812	0.514563	0.509532	0.811868	0.411791	0.212271
breast	3.13294	1.64516	2.14282	0.293202	0.559981	0.212271
heart muscle	3.00704	0.605182	1.26887	0.0368255	0.605184	0.612838
esophagus	1.23065	1.2422	1.24661	0.811868	0.721962	0.665143
thyroid gland	1.62636	1.30413	1.41362	0.549462	0.820027	0.665143
smooth muscle	2.70747	1.05311	1.55162	0.535258	0.885982	0.625544
choroid plexus	0.993086	0.786042	0.842282	1	0.934369	0.897326
parathyroid gland	2.06894	1.0795	1.37831	0.38538	0.935927	0.612838
salivary gland	NA	1.0711	0.746654	0.38346	0.935927	0.897326
stomach	0.806023	0.804208	0.800594	1	0.935927	0.897326
bone marrow	0.245417	0.930732	0.719454	0.113432	0.984137	0.375806
pituitary gland	0.696802	0.838311	0.792928	1	1	0.897326
