# Supplementary material for: Plasma Proteomics Identifies Insulin Resistance Signatures Predictive of Cardiometabolic Disease Risk
Source: Research Square preprint supplement (doi:10.21203/rs.3.rs-8585654/v1), 2026-01-21
Supplement: Supplementary file 18 [file Supplementary_Table_06.xlsx]

## Sheet: All_unique_proteins
ProteinID	GeneID	Estimate	P_value	adj.P_value	Workflow
Q9ULX7	CA14	1.07968	1.02338e-14	5.54263e-11	Olink
P02786	TFRC	0.521655	5.44555e-07	0.000492822	Neat
P02792	FTL	-0.637527	2.71518e-07	0.000541678	Depleted
Q9UKY0	PRND	0.929966	5.62229e-07	0.00133925	Olink
Q9BYE9	CDHR2	-0.323262	7.41831e-07	0.00133925	Olink
Q9NPY3	CD93	0.836656	1.0037e-06	0.001359	Olink
P33151	CDH5	0.614737	8.52545e-06	0.00566942	Depleted
P13686	ACP5	-0.440335	8.83672e-06	0.00957194	Olink
P02794	FTH1	-0.541625	2.12399e-05	0.0105934	Depleted
Q12805	EFEMP1	0.510675	3.80055e-05	0.011465	Neat
P01023	A2M	0.389874	5.63457e-05	0.0127482	Neat
P01009	SERPINA1	0.535677	7.80348e-05	0.0141243	Neat
P17600	SYN1	0.961682	0.000113184	0.0170719	Neat
P16581	SELE	-0.413587	1.92986e-05	0.0174202	Olink
P43489	TNFRSF4	0.6204	2.82299e-05	0.0218419	Olink
P02652	APOA2	-0.429868	7.4708e-05	0.0248404	Depleted
O15123	ANGPT2	0.463986	4.58997e-05	0.0310741	Olink
P02649	APOE	-0.405479	0.000109596	0.0312349	Depleted
Q8TED9	AFAP1L1	0.618934	6.80871e-05	0.0409733	Olink
O75636	FCN3	-0.245402	0.00016908	0.0421644	Depleted
P04278	SHBG	0.313465	0.000351997	0.0455081	Neat
P02787	TF	0.614515	0.000438556	0.0496116	Neat
P35542	SAA4	-0.407414	0.000240985	0.0504872	Depleted
A1L4H1	SSC5D	-0.632476	0.000253069	0.0504872	Depleted
P04179	SOD2	0.591294	0.000283705	0.0514537	Depleted
Q14118	DAG1	0.50168	0.000328746	0.0546541	Depleted
Q9P0K7	RAI14	-1.28719	0.000360468	0.0553179	Depleted
P12955	PEPD	0.48109	0.000772327	0.0770848	Neat
O14786	NRP1	0.39475	0.000882173	0.0770848	Neat
Q8WZ75	ROBO4	0.45052	0.000601914	0.0800546	Depleted
Q7Z7G0	ABI3BP	-0.33351	0.00017137	0.0919064	Olink
Q6UXG3	CD300LG	0.502328	0.000186664	0.0919064	Olink
P02743	APCS	-0.448933	0.000902847	0.112574	Depleted
Q86T13	CLEC14A	0.408356	0.000280355	0.1168	Olink
Q8WTU2	SSC4D	-0.168365	0.000330797	0.116825	Olink
Q9UJA9	ENPP5	0.21007	0.000335288	0.116825	Olink
Q8WWV6	FCAMR	-0.288626	0.000357464	0.116825	Olink
O14793	MSTN	-0.361893	0.000366695	0.116825	Olink
P02655	APOC2	-0.323211	0.0010871	0.118843	Depleted
O75874	IDH1	-0.466215	0.00112358	0.118843	Depleted
P20742	PZP	-0.11585	0.00113184	0.118843	Depleted
P16930	FAH	-0.427723	0.0012436	0.124049	Depleted
P42785	PRCP	-0.360369	0.000420611	0.126557	Olink
P07942	LAMB1	0.420635	0.00136464	0.12894	Depleted
P21695	GPD1	-0.404561	0.0014219	0.12894	Depleted
P00326	ADH1C	-0.452463	0.00163327	0.139325	Depleted
P01834	IGKC	0.392846	0.00218184	0.141041	Neat
P13645	KRT10	-0.554895	0.00298505	0.142188	Neat
P13647	KRT5	-0.580781	0.00299997	0.142188	Neat
P06396	GSN	0.52509	0.00314228	0.142188	Neat
P07359	GP1BA	0.440338	0.00355405	0.153163	Neat
P04264	KRT1	-0.530485	0.0037346	0.153628	Neat
A0A0B4J1Y8	IGLV9-49	-0.111916	0.00402606	0.158417	Neat
Q9H4G4	GLIPR2	0.529646	0.00427057	0.159633	Neat
Q13103	SPP2	0.305326	0.00443397	0.159633	Neat
Q8NBP7	PCSK9	0.493849	0.00458614	0.159633	Neat
P11464	PSG1	0.129767	0.000574555	0.163778	Olink
Q6UX15	LAYN	0.467732	0.000615766	0.166749	Olink
Q9UNM6	PSMD13	0.73805	0.0022634	0.16724	Depleted
A0A075B6P5	IGKV2-28	-0.17379	0.0050001	0.167596	Neat
Q9Y250	LZTS1	0.605821	0.000680499	0.175504	Olink
Q16549	PCSK7	-0.157072	0.000810338	0.19949	Olink
P20774	OGN	0.467739	0.00641273	0.200121	Neat
Q8IV16	GPIHBP1	0.429867	0.000947099	0.203133	Olink
Q5VWQ8	DAB2IP	-0.36617	0.00101052	0.203133	Olink
Q8IW00	VSTM4	0.343978	0.00102722	0.203133	Olink
Q16363	LAMA4	0.571273	0.00104491	0.203133	Olink
Q13093	PLA2G7	-0.345181	0.00105017	0.203133	Olink
P49913	CAMP	-0.239393	0.00300125	0.206465	Depleted
P36871	PGM1	-0.328591	0.00337818	0.217402	Depleted
Q96PD5	PGLYRP2	0.420036	0.0075974	0.224277	Neat
P23471	PTPRZ1	-0.792123	0.0076824	0.224277	Neat
P19652	ORM2	-0.386567	0.00855853	0.230787	Neat
P05090	APOD	0.411156	0.00914467	0.230787	Neat
P02538	KRT6A	-0.531101	0.00931049	0.230787	Neat
Q9Y6Z7	COLEC10	0.34425	0.00938963	0.230787	Neat
P58335	ANTXR2	0.359447	0.00969051	0.230787	Neat
Q9NYW8	RBAK	0.518005	0.0100534	0.23329	Neat
Q6UXI9	NPNT	0.495309	0.00379193	0.236403	Depleted
P35527	KRT9	-0.503405	0.011082	0.244614	Neat
Q92954	PRG4	-0.451706	0.000179283	0.249024	PCA
P35443	THBS4	0.400537	0.0123701	0.259742	Neat
Q9P2X0	DPM3	0.44741	0.0128085	0.259742	Neat
P0C0L5	C4B	-0.216326	0.0129905	0.259742	Neat
Q16288	NTRK3	-0.649026	0.0131404	0.259742	Neat
P01768	IGHV3-30	-0.251221	0.013482	0.259742	Neat
Q3LXA3	TKFC	-0.907696	0.0135716	0.259742	Neat
Q02985	CFHR3	-0.360585	0.0150015	0.271527	Neat
P80723	BASP1	0.412229	0.015884	0.274389	Neat
P00751	CFB	-0.287776	0.0160692	0.274389	Neat
P02766	TTR	-0.409405	0.0163782	0.274487	Neat
O15117	FYB1	1.42784	0.00501313	0.274797	Depleted
Q6UVK1	CSPG4	0.378423	0.00501909	0.274797	Depleted
Q9BPW8	NIPSNAP1	0.471606	0.00507011	0.274797	Depleted
P0DJI8	SAA1	-0.386016	0.0050957	0.274797	Depleted
Q8N307	MUC20	0.916778	0.00521729	0.274797	Depleted
A8K2U0	A2ML1	0.788563	0.00563063	0.281451	Depleted
P02654	APOC1	-0.270598	0.00569997	0.281451	Depleted
Q08380	LGALS3BP	-0.276712	0.00584309	0.281451	Depleted
O43157	PLXNB1	0.335706	0.00592529	0.281451	Depleted
Q04695	KRT17	0.632053	0.00614512	0.285105	Depleted
O75509	TNFRSF21	0.468675	0.00647477	0.28554	Depleted
O14791	APOL1	-0.314109	0.00647528	0.28554	Depleted
P05067	APP	0.596261	0.00658389	0.28554	Depleted
P02768	ALB	0.415524	0.0177483	0.286826	Neat
Q9P032	NDUFAF4	-0.503897	0.0182411	0.287608	Neat
Q8WUM4	PDCD6IP	-0.560943	0.0184323	0.287608	Neat
P35908	KRT2	-0.441617	0.0196763	0.291075	Neat
P06702	S100A9	-0.510132	0.0199318	0.291075	Neat
O14974	PPP1R12A	0.472847	0.0200837	0.291075	Neat
P05164	MPO	-0.446093	0.0202584	0.291075	Neat
Q8TBZ2	MYCBPAP	0.2614	0.0202627	0.291075	Neat
Q9H0X4	FAM234A	0.539175	0.00710447	0.294427	Depleted
P02533	KRT14	0.524626	0.00744788	0.294427	Depleted
P18065	IGFBP2	0.247978	0.00761276	0.294427	Depleted
Q9Y6R7	FCGBP	-0.235586	0.0076743	0.294427	Depleted
O95497	VNN1	-0.190388	0.00160627	0.296082	Olink
Q6IC83	C22orf42	-0.494782	0.00168819	0.296082	Olink
Q9P232	CNTN3	-0.352115	0.00169471	0.296082	Olink
P01040	CSTA	-0.451265	0.0214491	0.296824	Neat
Q86U17	SERPINA11	0.342565	0.0216468	0.296824	Neat
P27918	CFP	-0.452147	0.00176814	0.299258	Olink
P25774	CTSS	-0.382559	0.00797626	0.300239	Depleted
P23142	FBLN1	0.237346	0.0226372	0.305772	Neat
P55058	PLTP	-0.44177	0.00885819	0.315299	Depleted
P13639	EEF2	-0.436799	0.00894974	0.315299	Depleted
Q14767	LTBP2	0.371283	0.00900855	0.315299	Depleted
O00194	RAB27B	0.616938	0.00921936	0.317114	Depleted
P30046	DDT	-0.413056	0.00965232	0.321507	Depleted
P81172	HAMP	-0.631787	0.0249138	0.3221	Neat
P07306	ASGR1	-0.382152	0.00196843	0.323062	Olink
P24821	TNC	0.276924	0.02564	0.32682	Neat
P30039	PBLD	-0.434899	0.00213542	0.330441	Olink
Q93070	ART4	-0.480914	0.0265104	0.331687	Neat
Q9HBW9	ADGRL4	0.436173	0.0267549	0.331687	Neat
P18428	LBP	-0.444949	0.0103686	0.337104	Depleted
Q9UHL4	DPP7	0.30888	0.0106454	0.337104	Depleted
O95445	APOM	-0.305336	0.0110159	0.338104	Depleted
P01714	IGLV3-19	-0.175794	0.0280615	0.338799	Neat
Q8IV35	CFAP337	0.403595	0.0282473	0.338799	Neat
P19823	ITIH2	0.252436	0.029084	0.338799	Neat
O95389	CCN6	-0.444854	0.0291918	0.338799	Neat
P23280	CA6	0.324215	0.00230113	0.340693	Olink
Q9UJC3	HOOK1	-0.608502	0.00232749	0.340693	Olink
Q92484	SMPDL3A	0.165426	0.0113139	0.34199	Depleted
P42892	ECE1	0.543851	0.0118094	0.342578	Depleted
P55290	CDH13	0.376588	0.0119047	0.342578	Depleted
P08887	IL6R	-0.336957	0.0121515	0.342578	Depleted
P08236	GUSB	-0.184155	0.0122985	0.342578	Depleted
O00748	CES2	-0.440141	0.0124374	0.342578	Depleted
Q9NVC6	MED17	0.13571	0.0130977	0.353107	Depleted
P08217	CELA2A	0.300783	0.0312692	0.353733	Neat
P23470	PTPRG	0.365181	0.0325067	0.356857	Neat
P02647	APOA1	0.370052	0.0328883	0.356857	Neat
P20023	CR2	-0.22412	0.0331227	0.356857	Neat
Q6NY19	KANK3	-0.333596	0.0134779	0.358512	Depleted
O00231	PSMD11	0.525455	0.014058	0.36354	Depleted
Q9H792	PEAK1	0.210521	0.0140652	0.36354	Depleted
Q15262	PTPRK	-0.588955	0.00267783	0.381661	Olink
P10643	C7	0.171405	0.0365854	0.383583	Neat
P50281	MMP14	-0.416866	0.0368749	0.383583	Neat
P11766	ADH5	-0.448682	0.0152023	0.383907	Depleted
P01764	IGHV3-23	-0.209077	0.0382143	0.39167	Neat
P02747	C1QC	0.354336	0.0385178	0.39167	Neat
P33908	MAN1A1	-0.460944	0.0157077	0.391711	Depleted
P55056	APOC4	-0.400287	0.000281257	0.395136	MagNet
P08833	IGFBP1	-0.815666	0.000613328	0.395136	MagNet
P0DJI9	SAA2	-0.385384	0.0161829	0.39858	Depleted
B2RTY4	MYO9A	-0.45534	0.0401875	0.399667	Neat
Q99983	OMD	0.949884	0.0407017	0.400381	Neat
P16109	SELP	0.419586	0.0419291	0.406631	Neat
P02745	C1QA	0.375428	0.0422357	0.406631	Neat
P61769	B2M	-0.28204	0.0437592	0.412007	Neat
P00734	F2	0.285673	0.0439739	0.412007	Neat
P01767	IGHV3-53	0.273469	0.0451763	0.412007	Neat
O75594	PGLYRP1	-0.332947	0.0462176	0.412007	Neat
Q15113	PCOLCE	0.31034	0.0463973	0.412007	Neat
P24592	IGFBP6	-0.404354	0.0475141	0.412007	Neat
Q86YZ3	HRNR	-0.546911	0.0476687	0.412007	Neat
Q15582	TGFBI	0.263243	0.0477325	0.412007	Neat
P40925	MDH1	-0.473532	0.047802	0.412007	Neat
P33402	GUCY1A2	-0.434779	0.0171674	0.416252	Depleted
Q9UKU6	TRHDE	-0.205953	0.0175217	0.416252	Depleted
P15311	EZR	-0.377963	0.0176294	0.416252	Depleted
Q8NGM9	OR8D4	1.03798	0.0177351	0.416252	Depleted
Q92878	RAD50	0.32614	0.0489165	0.417636	Neat
A2CJ06	DYTN	-0.376776	0.0501422	0.420173	Neat
P51649	ALDH5A1	-0.515483	0.00310911	0.421446	Olink
P01241	GH1	0.449198	0.0031126	0.421446	Olink
Q03468	ERCC6	-0.202402	0.0510147	0.423445	Neat
A0A0A0MT89	IGKJ1	-0.10565	0.0514684	0.423445	Neat
P06454	PTMA	-0.73471	0.00104761	0.425773	PCA
Q68BL7	OLFML2A	-0.787651	0.00112195	0.425773	PCA
Q9UL68	MYT1L	-0.597559	0.00169388	0.425773	PCA
P05156	CFI	-0.515815	0.00183919	0.425773	PCA
O15033	AREL1	-0.379581	0.00323233	0.426983	Olink
P00747	PLG	0.25943	0.0533001	0.434564	Neat
Q96CX2	KCTD12	-0.527105	0.0550489	0.435755	Neat
A0A075B6S5	IGKV1-27	-0.311134	0.0551884	0.435755	Neat
Q9NZ08	ERAP1	0.346446	0.0562302	0.435755	Neat
A0A0B4J1X5	IGHV3-74	-0.208604	0.0563352	0.435755	Neat
P03951	F11	0.186826	0.0574412	0.440545	Neat
Q9Y485	DMXL1	0.472697	0.0589792	0.445064	Neat
P49802	RGS7	0.416742	0.0600939	0.445778	Neat
Q6UWW8	CES3	-0.3468	0.0192952	0.446393	Depleted
Q9UEW3	MARCO	-0.317395	0.0195181	0.446393	Depleted
Q8IUK5	PLXDC1	0.327752	0.0196905	0.446393	Depleted
P02788	LTF	0.232706	0.0611654	0.448547	Neat
A0A0B4J1V0	IGHV3-15	0.22042	0.0616281	0.448547	Neat
Q92859	NEO1	-0.334374	0.0628328	0.448547	Neat
Q9HBI1	PARVB	-0.556015	0.0642883	0.452362	Neat
P00739	HPR	-0.121994	0.0673391	0.464508	Neat
P01859	IGHG2	0.171521	0.0677514	0.464508	Neat
Q15485	FCN2	-0.37153	0.0036166	0.466369	Olink
P58499	FAM3B	0.575634	0.0212823	0.466574	Depleted
P04406	GAPDH	-0.34953	0.0687241	0.467634	Neat
Q8N0V3	RBFA	-0.603035	0.00371477	0.467888	Olink
P30622	CLIP1	-0.435534	0.0220768	0.47234	Depleted
Q9BQS7	HEPH	-0.455281	0.0222556	0.47234	Depleted
Q8IWV2	CNTN4	0.361371	0.0703772	0.475309	Neat
Q9H4B7	TUBB1	-0.450105	0.0229033	0.478258	Depleted
Q99707	MTR	-0.58192	0.0230139	0.478258	Depleted
Q6EMK4	VASN	-0.247709	0.0733831	0.478291	Neat
A0M8Q6	IGLC7	0.2506	0.0734425	0.478291	Neat
P01715	IGLV3-1	-0.155816	0.0735551	0.478291	Neat
Q9NQ79	CRTAC1	0.242398	0.0739898	0.478291	Neat
Q12882	DPYD	-0.421788	0.0232759	0.478717	Depleted
Q7Z4W1	DCXR	-0.3541	0.0237606	0.481657	Depleted
Q09327	MGAT3	-0.309361	0.0239018	0.481657	Depleted
Q9HCB6	SPON1	0.301155	0.0245482	0.489737	Depleted
Q9BWV1	BOC	0.492249	0.00302819	0.489755	PCA
Q12907	LMAN2	-0.422909	0.00317484	0.489755	PCA
P10912	GHR	-0.256092	0.00352595	0.489755	PCA
O60462	NRP2	0.340237	0.0251087	0.495958	Depleted
P0C0L4	C4A	-0.180964	0.0254201	0.497188	Depleted
P11597	CETP	-0.268423	0.0776594	0.498452	Neat
Q8WZA1	POMGNT1	0.284442	0.0266144	0.506119	Depleted
Q9NP78	ABCB9	-0.336542	0.0268859	0.506119	Depleted
P68366	TUBA4A	-0.462935	0.0272071	0.506799	Depleted
P29401	TKT	-0.264748	0.0274357	0.506799	Depleted
P25325	MPST	-0.422499	0.0291373	0.510172	Depleted
Q9NZL9	MAT2B	-0.515608	0.0291482	0.510172	Depleted
P05362	ICAM1	-0.303769	0.0293311	0.510172	Depleted
P13612	ITGA4	-0.403895	0.0298165	0.510172	Depleted
P37837	TALDO1	-0.348799	0.0301756	0.510172	Depleted
Q7Z4R8	C6orf120	0.390941	0.0804842	0.512945	Neat
Q13478	IL18R1	-0.339428	0.00418215	0.514785	Olink
P03950	ANG	-0.257291	0.0820207	0.517635	Neat
Q04756	HGFAC	0.16109	0.0827311	0.517635	Neat
A0A1B0GTC6	C3orf85	0.327349	0.0830295	0.517635	Neat
Q8IYS5	OSCAR	-0.462706	0.083697	0.517635	Neat
Q9UBQ6	EXTL2	0.33363	0.0846677	0.517635	Neat
P01743	IGHV1-46	-0.140194	0.0854679	0.517635	Neat
P03952	KLKB1	0.21667	0.0857959	0.517635	Neat
P05154	SERPINA5	-0.495525	0.00437619	0.521621	Olink
Q6ZMV9	KIF6	0.40323	0.00443031	0.521621	Olink
P01706	IGLV2-11	-0.176515	0.0873506	0.523525	Neat
O43747	AP1G1	-0.386981	0.0314633	0.527473	Depleted
P43251	BTD	-0.175195	0.0892894	0.528432	Neat
Q9UNW1	MINPP1	0.255246	0.0906014	0.528995	Neat
Q9NU53	GINM1	0.489538	0.0318487	0.529485	Depleted
P02763	ORM1	-0.48698	0.00228973	0.531218	MagNet
P01008	SERPINC1	0.206622	0.092772	0.531926	Neat
P07339	CTSD	-0.17567	0.0927859	0.531926	Neat
Q9BYJ0	FGFBP2	0.259376	0.0930844	0.531926	Neat
P01871	IGHM	0.140732	0.0934544	0.531926	Neat
P00966	ASS1	-0.40686	0.032537	0.536457	Depleted
Q9UKX5	ITGA11	0.550772	0.0335203	0.538816	Depleted
P24298	GPT	-0.336816	0.034179	0.538816	Depleted
P22003	BMP5	0.472812	0.0347639	0.538816	Depleted
P08294	SOD3	0.347305	0.0352688	0.538816	Depleted
Q92543	SNX19	-0.307161	0.0354368	0.538816	Depleted
Q99536	VAT1	-0.33801	0.0354471	0.538816	Depleted
Q8WXD2	SCG3	0.397219	0.0356959	0.538816	Depleted
Q6UXK5	LRRN1	-0.373473	0.0359507	0.538816	Depleted
P17039	ZNF30	0.412828	0.0360533	0.538816	Depleted
P17927	CR1	-0.315509	0.0361912	0.538816	Depleted
Q8TDQ0	HAVCR2	0.468989	0.0371638	0.547924	Depleted
P54108	CRISP3	0.228337	0.0373522	0.547924	Depleted
P01033	TIMP1	-0.242157	0.0974198	0.550811	Neat
Q5VU97	CACHD1	-0.633228	0.0379192	0.552181	Depleted
Q86VR7	VSIG10L	0.436416	0.00479775	0.552864	Olink
Q5D862	FLG2	-0.449734	0.0991068	0.553652	Neat
Q96NZ9	PRAP1	0.256982	0.100083	0.554271	Neat
Q04721	NOTCH2	-0.34341	0.100442	0.554271	Neat
P35226	BMI1	-0.444396	0.0385155	0.555683	Depleted
P34059	GALNS	0.228081	0.0387168	0.555683	Depleted
Q6UWV6	ENPP7	-0.18673	0.00494368	0.557812	Olink
P26022	PTX3	0.391429	0.00308281	0.559816	MagNet
O95747	OXSR1	-0.960417	0.00314235	0.559816	MagNet
P51161	FABP6	0.823409	0.0044462	0.561434	PCA
Q9HBR0	SLC38A10	0.271604	0.0396252	0.562612	Depleted
Q9Y266	NUDC	-0.500496	0.0397988	0.562612	Depleted
Q9NPR2	SEMA4B	-0.273359	0.0400455	0.562612	Depleted
P26038	MSN	-0.327304	0.104136	0.563318	Neat
Q96DM3	RMC1	-0.426212	0.104572	0.563318	Neat
P02462	COL4A1	0.303098	0.0051886	0.564295	Olink
P30838	ALDH3A1	-0.383366	0.00520952	0.564295	Olink
P07477	PRSS1	0.353213	0.110535	0.570434	Neat
Q7Z6K1	THAP5	0.216033	0.110935	0.570434	Neat
P42081	CD86	-0.452186	0.0411509	0.574098	Depleted
P49721	PSMB2	-0.266322	0.0414736	0.574301	Depleted
Q9H1U4	MEGF9	-0.397666	0.0417412	0.574301	Depleted
O60732	MAGEC1	0.830913	0.042564	0.58161	Depleted
P59998	ARPC4	0.645175	0.11563	0.586989	Neat
Q16851	UGP2	-0.221741	0.0435035	0.587697	Depleted
Q8N136	DAW1	-0.722281	0.0435986	0.587697	Depleted
P54136	RARS1	-0.971407	0.00403042	0.58789	MagNet
P0DP01	IGHV1-8	-0.552232	0.00434402	0.58789	MagNet
P10721	KIT	-0.220075	0.117388	0.589658	Neat
A0A0C4DH33	IGHV1-24	-0.100501	0.11875	0.589658	Neat
Q16627	CCL14	-0.270473	0.120632	0.589658	Neat
Q9P281	BAHCC1	0.394958	0.120959	0.589658	Neat
A0A075B6K5	IGLV3-9	-0.167621	0.121189	0.589658	Neat
P35858	IGFALS	0.162063	0.122954	0.592296	Neat
P16157	ANK1	-0.372401	0.124435	0.592296	Neat
O43505	B4GAT1	0.278996	0.127414	0.592296	Neat
P04433	IGKV3-11	0.13275	0.127845	0.592296	Neat
P05109	S100A8	-0.293207	0.129441	0.592296	Neat
O00391	QSOX1	0.188983	0.129471	0.592296	Neat
P0DOX5	NA	0.128096	0.1313	0.592296	Neat
P11150	LIPC	0.262537	0.131969	0.592296	Neat
A0A075B6J1	IGLV5-37	-0.327689	0.132048	0.592296	Neat
O60762	DPM1	0.407977	0.132816	0.592296	Neat
P26992	CNTFR	0.334234	0.133779	0.592296	Neat
Q68DL7	C18orf63	0.249968	0.134166	0.592296	Neat
Q92674	CENPI	-0.366466	0.135797	0.596585	Neat
O43150	ASAP2	0.764652	0.0446733	0.598143	Depleted
Q9BWS9	CHID1	-0.442728	0.0451554	0.600566	Depleted
Q02952	AKAP12	0.332231	0.045484	0.600931	Depleted
Q9BUN1	MENT	-0.297895	0.0465885	0.601055	Depleted
P09668	CTSH	-0.207529	0.0466106	0.601055	Depleted
P00338	LDHA	-0.327415	0.0469148	0.601055	Depleted
Q96J42	TXNDC15	-0.32306	0.0469458	0.601055	Depleted
P00352	ALDH1A1	-0.276903	0.0469998	0.601055	Depleted
Q9ULI1	NWD2	0.356451	0.0473976	0.602281	Depleted
Q04446	GBE1	-0.33396	0.0480373	0.606546	Depleted
Q9UMX5	NENF	0.251547	0.0488939	0.609645	Depleted
P00738	HP	-0.177318	0.139996	0.612062	Neat
Q6W2J9	BCOR	0.416563	0.0497305	0.616033	Depleted
Q9Y5X9	LIPG	-0.277367	0.0507911	0.616033	Depleted
P34932	HSPA4	-0.3221	0.0508573	0.616033	Depleted
Q9UHG3	PCYOX1	-0.256794	0.0509501	0.616033	Depleted
P16233	PNLIP	-0.672331	0.142696	0.617894	Neat
P31153	MAT2A	-0.417134	0.0522211	0.618035	Depleted
P11047	LAMC1	0.316309	0.0523548	0.618035	Depleted
Q14246	ADGRE1	-0.328863	0.00589342	0.618234	Olink
P00325	ADH1B	-0.376339	0.00593577	0.618234	Olink
Q7Z7M8	B3GNT8	0.319725	0.1436	0.618849	Neat
Q15811	ITSN1	-0.290527	0.0549042	0.621447	Depleted
P24043	LAMA2	0.277614	0.054958	0.621447	Depleted
P06858	LPL	0.308937	0.0553923	0.621447	Depleted
P41439	FOLR3	0.310367	0.0554777	0.621447	Depleted
P57076	CFAP298	-0.380654	0.0556049	0.621447	Depleted
Q6UX71	PLXDC2	0.332755	0.0557742	0.621447	Depleted
P48163	ME1	-0.254402	0.0566455	0.621447	Depleted
P04259	KRT6B	0.43443	0.05806	0.621447	Depleted
O43639	NCK2	0.620916	0.0583389	0.621447	Depleted
P07998	RNASE1	0.376169	0.0588823	0.621447	Depleted
Q9Y678	COPG1	-0.692951	0.0589583	0.621447	Depleted
Q9Y4D7	PLXND1	0.324895	0.0590222	0.621447	Depleted
Q8NF67	ANKRD20A12P	-0.584465	0.0593511	0.621447	Depleted
P12111	COL6A3	0.291219	0.0596004	0.621447	Depleted
Q86TH1	ADAMTSL2	0.171176	0.0597572	0.621447	Depleted
P27930	IL1R2	0.24694	0.0599459	0.621447	Depleted
O60687	SRPX2	-0.622457	0.0603941	0.621447	Depleted
P01911	HLA-DRB1	-0.306113	0.0605198	0.621447	Depleted
Q5JSH3	WDR44	-0.40714	0.0605968	0.621447	Depleted
Q9NNX6	CD209	-0.357773	0.0610804	0.621447	Depleted
P02656	APOC3	-0.169978	0.0610873	0.621447	Depleted
C9JJ37	BTBD19	0.314376	0.0613002	0.621447	Depleted
Q9H8L6	MMRN2	0.169692	0.0615294	0.621447	Depleted
Q16832	DDR2	0.348099	0.0619525	0.621447	Depleted
Q08257	CRYZ	-0.27265	0.063256	0.630979	Depleted
Q6PCE3	PGM2L1	-0.526649	0.0639139	0.634078	Depleted
Q9P1F3	ABRACL	-0.404988	0.0642024	0.634078	Depleted
P01602	IGKV1-5	-0.373976	0.064534	0.634214	Depleted
P60981	DSTN	-0.371762	0.0650367	0.63602	Depleted
Q9H2X3	CLEC4M	-0.350179	0.149058	0.636309	Neat
Q86U10	ASPG	-0.496579	0.00622758	0.636388	Olink
Q9BXN1	ASPN	-0.277785	0.150402	0.636967	Neat
P01854	IGHE	-0.192335	0.151364	0.637137	Neat
P19827	ITIH1	0.17513	0.152144	0.637176	Neat
Q9Y617	PSAT1	-0.299271	0.0659493	0.638811	Depleted
P08637	FCGR3A	-0.177154	0.0659625	0.638811	Depleted
A0A075B6K0	IGLV3-16	-0.118159	0.153898	0.638888	Neat
Q01995	TAGLN	0.266829	0.0670185	0.640371	Depleted
P02675	FGB	-0.248282	0.0672779	0.640371	Depleted
Q96KP4	CNDP2	-0.407124	0.068346	0.640371	Depleted
Q9H159	CDH19	0.32809	0.0686915	0.640371	Depleted
Q96AP7	ESAM	0.351273	0.00640958	0.642857	Olink
P22105	TNXB	0.247976	0.157583	0.64504	Neat
Q01459	CTBS	0.153227	0.157697	0.64504	Neat
Q8IWL1	SFTPA2	0.302059	0.160915	0.645964	Neat
P07686	HEXB	-0.173633	0.161012	0.645964	Neat
Q13200	PSMD2	-0.309501	0.163835	0.645964	Neat
P82980	RBP5	-0.393214	0.00656374	0.646349	Olink
P08195	SLC3A2	0.148396	0.0696683	0.646457	Depleted
Q9BY67	CADM1	-0.288	0.166024	0.647638	Neat
O95803	NDST3	-0.98311	0.0706456	0.649019	Depleted
Q13217	DNAJC3	0.292009	0.0709204	0.649019	Depleted
Q9BXX0	EMILIN2	-0.484913	0.0716762	0.651389	Depleted
P09417	QDPR	-0.326118	0.0718323	0.651389	Depleted
P55072	VCP	-0.402925	0.171401	0.654249	Neat
P0DOX6	NA	0.124332	0.17177	0.654249	Neat
Q12788	TBL3	-0.258503	0.172336	0.654249	Neat
A0A075B6S6	IGKV2D-30	-0.0970308	0.172508	0.654249	Neat
P47874	OMP	-0.460422	0.172556	0.654249	Neat
P0DOX7	NA	0.115863	0.173779	0.654249	Neat
P08697	SERPINF2	0.188747	0.176286	0.654249	Neat
P12814	ACTN1	-0.274737	0.176394	0.654249	Neat
P04439	HLA-A	-0.305415	0.177639	0.654973	Neat
Q9UBG0	MRC2	0.303905	0.178761	0.654973	Neat
Q96EE4	CCDC126	-0.264874	0.182001	0.65905	Neat
Q9NPH3	IL1RAP	0.114917	0.183038	0.65905	Neat
P05106	ITGB3	-0.287802	0.183557	0.65905	Neat
P36980	CFHR2	-0.0860052	0.184407	0.65905	Neat
Q16270	IGFBP7	0.28355	0.184482	0.65905	Neat
P40189	IL6ST	-0.261354	0.185052	0.65905	Neat
Q96M91	CFAP53	-0.41448	0.190326	0.65905	Neat
P01700	IGLV1-47	-0.112697	0.191284	0.65905	Neat
P19021	PAM	0.287334	0.191431	0.65905	Neat
Q8TER0	SNED1	0.277601	0.191666	0.65905	Neat
P62937	PPIA	-0.267881	0.192253	0.65905	Neat
Q2TAL6	VWC2	-0.320439	0.00696893	0.660502	Olink
Q86W50	METTL16	0.556129	0.00702351	0.660502	Olink
P08263	GSTA1	-0.329051	0.00707332	0.660502	Olink
Q5T749	KPRP	0.304696	0.19635	0.668034	Neat
O60645	EXOC3	-0.143616	0.197295	0.668734	Neat
Q9NTU7	CBLN4	-0.163992	0.00754505	0.669737	Olink
P50053	KHK	-0.35336	0.00782717	0.669737	Olink
O14904	WNT9A	0.348042	0.00791357	0.669737	Olink
P05783	KRT18	-0.288822	0.00795756	0.669737	Olink
Q8WV41	SNX33	-0.472891	0.00803571	0.669737	Olink
P23141	CES1	-0.274993	0.00833491	0.669737	Olink
P08758	ANXA5	-0.577913	0.00833492	0.669737	Olink
Q9HAW4	CLSPN	0.496749	0.00840881	0.669737	Olink
P43121	MCAM	0.425358	0.00858939	0.671078	Olink
Q9NRP4	SDHAF3	-0.537268	0.00867346	0.671078	Olink
Q6NUS6	TCTN3	-0.344245	0.0745695	0.67315	Depleted
Q92743	HTRA1	0.325925	0.201349	0.673809	Neat
P35247	SFTPD	-0.193958	0.202902	0.673809	Neat
Q9UBX5	FBLN5	0.243079	0.203259	0.673809	Neat
Q16836	HADH	0.43932	0.205561	0.674776	Neat
P01019	AGT	0.116037	0.206433	0.674776	Neat
P22891	PROZ	0.170568	0.207242	0.674776	Neat
Q13231	CHIT1	0.364691	0.208025	0.674776	Neat
O75116	ROCK2	0.620369	0.0755213	0.677806	Depleted
Q06418	TYRO3	0.285204	0.0757648	0.677806	Depleted
P13688	CEACAM1	-0.288048	0.0764494	0.677851	Depleted
Q0VD83	APOBR	0.358576	0.00584387	0.682074	MagNet
Q6ZNJ1	NBEAL2	-0.862246	0.00706756	0.682074	MagNet
P01130	LDLR	-0.375579	0.00719592	0.682074	MagNet
P35613	BSG	-0.684115	0.00809608	0.682074	MagNet
P04114	APOB	-0.383422	0.00840315	0.682074	MagNet
P19256	CD58	1.35673	0.0088816	0.682074	MagNet
P25787	PSMA2	-0.31641	0.0102425	0.682074	MagNet
P01833	PIGR	-0.21443	0.0113358	0.682074	MagNet
P08319	ADH4	-0.394785	0.0114495	0.682074	MagNet
Q684P5	RAP1GAP2	-1.13328	0.0115158	0.682074	MagNet
P10586	PTPRF	-0.392588	0.0117964	0.682074	MagNet
Q99832	CCT7	-0.577211	0.0125142	0.682074	MagNet
P02741	CRP	-0.469643	0.0125557	0.682074	MagNet
P46977	STT3A	0.860418	0.0131629	0.682074	MagNet
P63010	AP2B1	-0.655782	0.0131974	0.682074	MagNet
Q03591	CFHR1	-0.368114	0.0140825	0.682074	MagNet
A0A0G2JS06	IGLV5-39	-0.195764	0.014163	0.682074	MagNet
Q9NTK5	OLA1	0.583209	0.0142799	0.682074	MagNet
Q96QK1	VPS35	-0.650387	0.0151901	0.683027	MagNet
Q8TD16	BICD2	-0.515882	0.0161326	0.683027	MagNet
P10909	CLU	-0.403774	0.0162902	0.683027	MagNet
P01031	C5	-0.468313	0.0163306	0.683027	MagNet
P31930	UQCRC1	-0.794762	0.0164027	0.683027	MagNet
O75054	IGSF3	-0.367087	0.00899264	0.685974	Olink
Q9BTU6	PI4K2A	-0.286632	0.214892	0.686505	Neat
O75083	WDR1	-0.344083	0.215075	0.686505	Neat
A0A0C4DH29	IGHV1-3	0.175145	0.217404	0.686505	Neat
P28827	PTPRM	0.22339	0.217954	0.686505	Neat
O75940	SMNDC1	-0.250523	0.220161	0.686505	Neat
P18850	ATF6	0.239721	0.220875	0.686505	Neat
P81605	DCD	-0.241821	0.221293	0.686505	Neat
P23083	IGHV1-2	-0.133585	0.223859	0.68926	Neat
A0A0B4J1V7	IGHV7-81	-0.530979	0.223914	0.68926	Neat
P15085	CPA1	-0.259132	0.225617	0.692148	Neat
P06753	TPM3	-0.301099	0.231036	0.692335	Neat
Q08554	DSC1	-0.303965	0.232848	0.692335	Neat
Q12841	FSTL1	0.229764	0.234379	0.692335	Neat
Q8IZA0	KIAA0319L	0.451472	0.235417	0.692335	Neat
P23284	PPIB	-0.345426	0.235623	0.692335	Neat
O43866	CD5L	-0.158728	0.0794604	0.695278	Depleted
Q96S96	PEBP4	0.221433	0.0801436	0.697333	Depleted
O60667	FCMR	-0.256695	0.0803943	0.697333	Depleted
P56202	CTSW	0.454343	0.0807637	0.697505	Depleted
P0C862	C1QTNF9	0.248823	0.00931328	0.697914	Olink
Q86VB7	CD163	-0.249359	0.0094069	0.697914	Olink
Q96KN2	CNDP1	-0.352792	0.0172033	0.698454	MagNet
P02452	COL1A1	-0.525095	0.00608047	0.703815	PCA
P31151	S100A7	-0.267434	0.244049	0.708698	Neat
P00742	F10	-0.153711	0.244869	0.708698	Neat
P12259	F5	0.117165	0.245112	0.708698	Neat
P62805	H4C1	0.266749	0.0835423	0.712252	Depleted
Q9UQ80	PA2G4	-0.279088	0.0844454	0.71385	Depleted
Q13228	SELENBP1	-0.237233	0.249794	0.715239	Neat
O60312	ATP10A	-0.137347	0.250531	0.715239	Neat
P02812	PRB2	-0.451656	0.0854786	0.716512	Depleted
P01893	HLA-H	0.0756812	0.253151	0.719045	Neat
P15291	B4GALT1	0.189229	0.256631	0.719045	Neat
Q13418	ILK	-0.396945	0.258589	0.719483	Neat
Q8WWQ8	STAB2	-0.252054	0.0870861	0.722748	Depleted
P02549	SPTA1	0.744469	0.08766	0.722748	Depleted
P05062	ALDOB	-0.2195	0.0876717	0.722748	Depleted
P67936	TPM4	-0.245283	0.263959	0.723736	Neat
Q12931	TRAP1	-0.224359	0.266232	0.723736	Neat
P10321	HLA-C	-0.166563	0.267339	0.723736	Neat
Q13113	PDZK1IP1	0.299871	0.268199	0.723736	Neat
P02760	AMBP	0.131786	0.270301	0.723736	Neat
P09486	SPARC	-0.31853	0.271196	0.723809	Neat
P09382	LGALS1	0.314595	0.271928	0.723809	Neat
P02679	FGG	-0.226293	0.0884394	0.726076	Depleted
Q9Y2V2	CARHSP1	0.477739	0.0889225	0.726505	Depleted
Q92747	ARPC1A	0.422043	0.089545	0.726505	Depleted
O75503	CLN5	0.150029	0.0895841	0.726505	Depleted
A0A075B6I3	IGLV11-55	-0.195001	0.276141	0.728111	Neat
P07148	FABP1	-0.27639	0.276897	0.728111	Neat
A0A0C4DH43	IGHV2-70D	0.0857675	0.277238	0.728111	Neat
P22792	CPN2	0.103807	0.277567	0.728111	Neat
P55285	CDH6	0.249292	0.0908062	0.729672	Depleted
Q9UPZ6	THSD7A	-0.387911	0.091109	0.729672	Depleted
Q6BDS2	BLTP3A	-0.276378	0.0920154	0.729672	Depleted
Q8NDA2	HMCN2	0.117322	0.0921691	0.729672	Depleted
O95954	FTCD	-0.344898	0.010383	0.73206	Olink
Q13410	BTN1A1	-0.241184	0.0103877	0.73206	Olink
Q9NSK7	C19orf12	-0.314188	0.0104078	0.73206	Olink
Q08345	DDR1	0.334596	0.0944513	0.734678	Depleted
P16112	ACAN	-0.248656	0.0948245	0.734678	Depleted
O75147	OBSL1	0.260555	0.0952267	0.734678	Depleted
Q9Y240	CLEC11A	-0.444389	0.0952778	0.734678	Depleted
O75356	ENTPD5	-0.230346	0.0958786	0.734678	Depleted
P30613	PKLR	-0.454057	0.096661	0.734678	Depleted
Q96HD1	CRELD1	-0.304233	0.0972468	0.734678	Depleted
P18627	LAG3	-0.316046	0.0972652	0.734678	Depleted
P35998	PSMC2	0.669309	0.0984127	0.738095	Depleted
Q15911	ZFHX3	-0.228228	0.100468	0.739707	Depleted
P20231	TPSB2	-0.239455	0.100468	0.739707	Depleted
Q16881	TXNRD1	-0.319198	0.101388	0.739707	Depleted
P06733	ENO1	-0.281272	0.101576	0.739707	Depleted
Q9Y3B8	REXO2	0.535123	0.101994	0.739707	Depleted
Q86UN3	RTN4RL2	-0.210164	0.102083	0.739707	Depleted
Q6ZS92	NA	0.376695	0.102298	0.739707	Depleted
P08575	PTPRC	-0.23573	0.102335	0.739707	Depleted
P12724	RNASE3	-0.423338	0.103166	0.740142	Depleted
Q9H299	SH3BGRL3	-0.227619	0.284027	0.740308	Neat
P13716	ALAD	-0.280692	0.286333	0.740308	Neat
O14618	CCS	-0.43789	0.286418	0.740308	Neat
P01601	IGKV1D-16	0.173854	0.294869	0.741918	Neat
Q99684	GFI1	-0.127222	0.29697	0.741918	Neat
A0A0A0MRZ9	IGLV5-52	0.145747	0.296982	0.741918	Neat
Q9UBR2	CTSZ	-0.182985	0.298657	0.741918	Neat
A0A0G2JMI3	IGHV1-69-2	-0.119789	0.299227	0.741918	Neat
P36404	ARL2	-0.200606	0.30025	0.74242	Neat
P04430	IGKV1-16	0.0820302	0.302468	0.745867	Neat
Q9H3U7	SMOC2	0.391465	0.0107667	0.747598	Olink
P01814	IGHV2-70	-0.39285	0.0189258	0.749646	MagNet
P09211	GSTP1	-0.808087	0.00732047	0.751471	PCA
P12109	COL6A1	0.637296	0.00918531	0.751471	PCA
B2RPK0	HMGB1P1	0.761321	0.0103946	0.751471	PCA
Q96BD5	PHF21A	0.597218	0.0105329	0.751471	PCA
P47914	RPL29	-0.565261	0.0116761	0.751471	PCA
Q8WV28	BLNK	-0.59356	0.013336	0.751471	PCA
Q9UGM5	FETUB	-0.331429	0.0134673	0.751471	PCA
O00592	PODXL	0.315183	0.0163451	0.751471	PCA
P14555	PLA2G2A	0.430904	0.0178253	0.751471	PCA
P55145	MANF	-0.48851	0.0182645	0.751471	PCA
Q14966	ZNF638	1.02292	0.018522	0.751471	PCA
Q9NZP8	C1RL	-0.300297	0.0200414	0.751471	PCA
Q06323	PSME1	-0.660523	0.0200803	0.751471	PCA
Q13510	ASAH1	0.783675	0.0206268	0.751471	PCA
P05452	CLEC3B	0.150566	0.0207223	0.751471	PCA
P84157	MXRA7	0.380502	0.0210563	0.751471	PCA
O43491	EPB41L2	-0.508383	0.0210996	0.751471	PCA
P02746	C1QB	0.162859	0.310409	0.751571	Neat
P14207	FOLR2	0.201042	0.31118	0.751571	Neat
Q9BTY2	FUCA2	-0.0662835	0.312452	0.751571	Neat
Q9NP80	PNPLA8	0.091412	0.312943	0.751571	Neat
P05997	COL5A2	0.339094	0.105733	0.753351	Depleted
Q99996	AKAP9	-0.314299	0.0218395	0.758376	PCA
O43242	PSMD3	-0.541934	0.0196565	0.76005	MagNet
O94762	RECQL5	-0.43988	0.0111166	0.762119	Olink
Q9Y5K6	CD2AP	0.533601	0.108747	0.766611	Depleted
P00558	PGK1	-0.21663	0.321653	0.768063	Neat
Q9H2H9	SLC38A1	-0.301751	0.109694	0.768693	Depleted
P63313	TMSB10	-0.277445	0.110338	0.768693	Depleted
P28838	LAP3	-0.26832	0.110811	0.768693	Depleted
P04424	ASL	-0.267136	0.111383	0.768693	Depleted
P06727	APOA4	0.253304	0.111395	0.768693	Depleted
Q9H4A4	RNPEP	-0.237097	0.111678	0.768693	Depleted
O94933	SLITRK3	-0.177201	0.11174	0.768693	Depleted
A0A087WSY4	IGHV4-30-2	-0.239413	0.323444	0.768779	Neat
P50395	GDI2	-0.245302	0.325604	0.768779	Neat
P04004	VTN	-0.112794	0.327676	0.77025	Neat
P31415	CASQ1	-0.595159	0.112467	0.771035	Depleted
A0A075B6I0	IGLV8-61	-0.0628385	0.329128	0.77166	Neat
Q15942	ZYX	-0.311266	0.113516	0.772177	Depleted
Q9UIW2	PLXNA1	-0.307148	0.114286	0.772177	Depleted
P51148	RAB5C	-0.288053	0.115095	0.772177	Depleted
Q16774	GUK1	0.48428	0.11617	0.772177	Depleted
P01137	TGFB1	0.307532	0.116929	0.772177	Depleted
A0A0B4J1V2	IGHV2-26	-0.211273	0.117018	0.772177	Depleted
Q4G0U5	CFAP221	0.289289	0.117087	0.772177	Depleted
A0A087WSY6	IGKV3D-15	0.0667532	0.336352	0.774778	Neat
P28062	PSMB8	-0.237473	0.118323	0.775865	Depleted
P25786	PSMA1	-0.183338	0.119281	0.775865	Depleted
Q13126	MTAP	-0.418674	0.120111	0.775865	Depleted
Q9UPS8	ANKRD26	-0.281307	0.120256	0.775865	Depleted
Q6UWP8	SBSN	0.208527	0.120561	0.775865	Depleted
Q9UK23	NAGPA	-0.241876	0.121304	0.776044	Depleted
P34096	RNASE4	0.292484	0.121366	0.776044	Depleted
A6NHG4	DDTL	-0.22342	0.341302	0.776234	Neat
Q7Z7M0	MEGF8	0.149191	0.341709	0.776234	Neat
P62258	YWHAE	-0.287904	0.342229	0.776234	Neat
Q7L1S5	CHST9	0.358657	0.0206422	0.776335	MagNet
Q76LX8	ADAMTS13	-0.305252	0.0212536	0.776335	MagNet
P00736	C1R	-0.411619	0.02176	0.776335	MagNet
Q9UIQ6	LNPEP	0.350283	0.121808	0.776382	Depleted
Q9UKJ1	PILRA	-0.275006	0.123081	0.77696	Depleted
P21399	ACO1	-0.271258	0.123558	0.77696	Depleted
Q9UJU6	DBNL	-0.317424	0.123694	0.77696	Depleted
Q8N4A0	GALNT4	-0.342057	0.124227	0.77696	Depleted
Q16378	PRR4	-0.295964	0.124236	0.77696	Depleted
P61604	HSPE1	-0.202503	0.345959	0.782733	Neat
Q13164	MAPK7	0.212701	0.348314	0.783661	Neat
Q6P179	ERAP2	0.16582	0.350449	0.783661	Neat
Q76M96	CCDC80	-0.424752	0.0231585	0.784564	PCA
Q9UBQ7	GRHPR	-0.288889	0.126966	0.785461	Depleted
Q14694	USP10	-0.355288	0.127208	0.785461	Depleted
P25788	PSMA3	-0.197558	0.128065	0.785461	Depleted
A0A0B4J1U7	IGHV6-1	-0.106734	0.128358	0.785461	Depleted
O00213	APBB1	-0.258988	0.128576	0.785461	Depleted
P13497	BMP1	-0.27519	0.128951	0.785461	Depleted
Q8WVM8	SCFD1	0.276353	0.129479	0.785461	Depleted
Q96CN7	ISOC1	-0.26019	0.129816	0.785461	Depleted
Q9HCL0	PCDH18	0.275277	0.13048	0.785461	Depleted
Q99650	OSMR	0.192961	0.130713	0.785461	Depleted
P69849	NOMO3	-0.222894	0.131615	0.787459	Depleted
Q9UJC5	SH3BGRL2	-0.292644	0.13202	0.787459	Depleted
P02671	FGA	-0.22357	0.132625	0.787459	Depleted
Q9H6N6	MYH16	0.317422	0.133035	0.787552	Depleted
P47712	PLA2G4A	0.929507	0.0238759	0.788021	MagNet
P33176	KIF5B	-0.675471	0.024875	0.788021	MagNet
Q16539	MAPK14	-0.738036	0.0250516	0.788021	MagNet
P01024	C3	-0.430077	0.0254732	0.788021	MagNet
Q96P48	ARAP1	-0.781462	0.0258661	0.788021	MagNet
Q9HDC9	APMAP	-0.269371	0.026049	0.788021	MagNet
Q99715	COL12A1	0.299291	0.0262027	0.788021	MagNet
P17980	PSMC3	-0.488337	0.0268082	0.791573	MagNet
P20929	NEB	-0.759324	0.0239366	0.791619	PCA
Q8NC01	CLEC1A	0.327671	0.0116971	0.791894	Olink
P55083	MFAP4	-0.181111	0.36041	0.793287	Neat
A0A075B6S2	IGKV2D-29	-0.0453275	0.361143	0.793287	Neat
P17405	SMPD1	0.13863	0.135867	0.793381	Depleted
Q8TDL5	BPIFB1	-0.228215	0.135933	0.793381	Depleted
P06756	ITGAV	0.311049	0.136008	0.793381	Depleted
P17174	GOT1	0.153829	0.36549	0.797033	Neat
O00175	CCL24	-0.299197	0.137896	0.798513	Depleted
P68371	TUBB4B	-0.281591	0.138336	0.798513	Depleted
P22735	TGM1	0.634946	0.140024	0.799729	Depleted
P07355	ANXA2	0.324144	0.140485	0.799729	Depleted
Q96JM4	LRRIQ1	0.717779	0.14074	0.799729	Depleted
P01266	TG	-0.300245	0.140763	0.799729	Depleted
Q8N1G1	REXO1	0.848346	0.141587	0.799729	Depleted
O94818	NOL4	-0.204153	0.141918	0.799729	Depleted
Q9NY15	STAB1	0.207514	0.142303	0.799729	Depleted
O75309	CDH16	0.323333	0.142668	0.799729	Depleted
P12821	ACE	0.169378	0.142709	0.799729	Depleted
Q9NZK5	ADA2	-0.294253	0.0120563	0.803157	Olink
O43909	EXTL3	-0.39366	0.0122517	0.803157	Olink
Q9NUP7	TRMT13	-0.545769	0.012418	0.803157	Olink
Q6ZMH5	SLC39A5	-0.33781	0.0124566	0.803157	Olink
Q10588	BST1	0.0785811	0.377365	0.806344	Neat
P30043	BLVRB	-0.191235	0.380011	0.806344	Neat
Q5XPI4	RNF123	0.14243	0.380234	0.806344	Neat
P14174	MIF	-0.222868	0.382615	0.806344	Neat
A0A0B4J1V6	IGHV3-73	0.0880567	0.38344	0.806344	Neat
O95477	ABCA1	-0.0619201	0.383489	0.806344	Neat
P01860	IGHG3	0.0425324	0.385126	0.806344	Neat
Q92520	FAM3C	0.211022	0.144667	0.806616	Depleted
P22455	FGFR4	0.349855	0.145061	0.806616	Depleted
Q02747	GUCA2A	0.219508	0.145731	0.806616	Depleted
Q9NYL9	TMOD3	0.43654	0.1458	0.806616	Depleted
Q8TDY8	IGDCC4	0.240052	0.146154	0.806616	Depleted
Q9UGT4	SUSD2	0.270947	0.146448	0.806616	Depleted
O60641	SNAP91	-0.445602	0.0126656	0.807022	Olink
O00754	MAN2B1	-0.236327	0.147257	0.807084	Depleted
O43405	COCH	0.346753	0.149771	0.808285	Depleted
Q9NS71	GKN1	0.194142	0.150014	0.808285	Depleted
P61086	UBE2K	0.382164	0.150203	0.808285	Depleted
O95810	CAVIN2	-0.289576	0.150214	0.808285	Depleted
Q86SQ4	ADGRG6	-0.211476	0.150243	0.808285	Depleted
P55209	NAP1L1	0.336507	0.150427	0.808285	Depleted
P32119	PRDX2	-0.185002	0.391731	0.809067	Neat
P07237	P4HB	-0.170539	0.392524	0.809067	Neat
Q13370	PDE3B	-0.186925	0.399201	0.809067	Neat
P0DMV8	HSPA1A	-0.263989	0.15211	0.809223	Depleted
Q9NY47	CACNA2D2	0.323298	0.152982	0.810555	Depleted
P13489	RNH1	-0.230251	0.154395	0.810555	Depleted
P51610	HCFC1	0.306212	0.154838	0.810555	Depleted
Q13485	SMAD4	0.285773	0.155201	0.810555	Depleted
A6NGU5	GGT3P	-0.151358	0.155787	0.810555	Depleted
P68363	TUBA1B	-0.273305	0.155799	0.810555	Depleted
P04062	GBA1	-0.277901	0.156017	0.810555	Depleted
Q05707	COL14A1	-0.314824	0.0254529	0.814036	PCA
A8MVW5	HEPACAM2	0.230449	0.0258749	0.814036	PCA
P08253	MMP2	0.248314	0.157155	0.814347	Depleted
P37840	SNCA	-0.148008	0.405879	0.81832	Neat
Q15149	PLEC	0.0974113	0.408809	0.820337	Neat
Q86UD1	OAF	0.137172	0.414339	0.823668	Neat
P13671	C6	0.121241	0.426851	0.823668	Neat
P52732	KIF11	0.0521036	0.428902	0.824111	Neat
Q9Y2H1	STK38L	-0.1404	0.431474	0.825518	Neat
Q9GZT8	NIF3L1	-0.193046	0.431978	0.825518	Neat
Q8WWZ8	OIT3	-0.0769436	0.432501	0.825518	Neat
P07988	SFTPB	0.0618507	0.434095	0.825518	Neat
Q9UKK9	NUDT5	0.517359	0.161799	0.82559	Depleted
Q02413	DSG1	0.350883	0.161827	0.82559	Depleted
P05026	ATP1B1	-0.265552	0.163158	0.82559	Depleted
P15814	IGLL1	0.0820307	0.43977	0.827426	Neat
Q9UPQ3	AGAP1	-0.0824767	0.441586	0.828555	Neat
Q96MC2	DRC1	0.469285	0.0132317	0.83035	Olink
Q16772	GSTA3	-0.341146	0.0133442	0.83035	Olink
O60895	RAMP2	0.503032	0.0138202	0.83035	Olink
O60635	TSPAN1	-0.188249	0.0139854	0.83035	Olink
Q09666	AHNAK	-0.423043	0.0140625	0.83035	Olink
Q9UIW0	VAX2	0.45174	0.0141724	0.83035	Olink
O95905	ECD	-0.536288	0.0143305	0.83035	Olink
Q6P5Q4	LMOD2	-0.490652	0.0144115	0.83035	Olink
Q9H4D0	CLSTN2	0.323406	0.0146674	0.830388	Olink
Q02641	CACNB1	0.481901	0.0147188	0.830388	Olink
P09496	CLTA	-0.513311	0.0152567	0.830956	Olink
Q8NEZ4	KMT2C	-0.409085	0.0153786	0.830956	Olink
Q8N608	DPP10	-0.188433	0.0155668	0.830956	Olink
P32754	HPD	-0.313559	0.0157304	0.830956	Olink
P40198	CEACAM3	-0.43411	0.0157325	0.830956	Olink
Q16719	KYNU	-0.297301	0.0158029	0.830956	Olink
A2VDF0	FUOM	-0.365759	0.01602	0.831251	Olink
P48307	TFPI2	0.310326	0.0163833	0.831251	Olink
Q9BXF3	CECR2	-0.45709	0.0165422	0.831251	Olink
P14151	SELL	-0.298813	0.0166775	0.831251	Olink
Q9Y4X4	KLF12	-0.420931	0.0167721	0.831251	Olink
P21709	EPHA1	-0.354732	0.0169173	0.831251	Olink
Q8NEJ9	NGDN	-0.433656	0.0169833	0.831251	Olink
P57087	JAM2	0.398132	0.0170363	0.831251	Olink
Q96IY1	NSL1	0.311223	0.165924	0.833004	Depleted
Q9Y490	TLN1	-0.279597	0.166183	0.833004	Depleted
P10398	ARAF	1.02319	0.0297081	0.834132	MagNet
P49908	SELENOP	-0.291941	0.0297393	0.834132	MagNet
P05155	SERPING1	-0.426006	0.0297904	0.834132	MagNet
Q03154	ACY1	-0.173167	0.167011	0.835056	Depleted
Q8N159	NAGS	0.202146	0.450944	0.83722	Neat
Q06033	ITIH3	0.0737644	0.452527	0.83722	Neat
P08174	CD55	-0.137126	0.453248	0.83722	Neat
Q99497	PARK7	-0.158722	0.453301	0.83722	Neat
P35241	RDX	-0.267571	0.169455	0.837978	Depleted
P04275	VWF	0.260031	0.170443	0.837978	Depleted
Q9BR84	ZNF559	0.2954	0.172594	0.837978	Depleted
Q7Z7F0	KHDC4	0.264684	0.173049	0.837978	Depleted
Q6UXH1	CRELD2	0.365236	0.173333	0.837978	Depleted
Q93033	CD101	0.199992	0.173653	0.837978	Depleted
Q9BYX7	POTEKP	-0.34707	0.173927	0.837978	Depleted
P48357	LEPR	0.20101	0.174079	0.837978	Depleted
P40199	CEACAM6	-0.240014	0.17473	0.837978	Depleted
Q13563	PKD2	-0.326205	0.175267	0.837978	Depleted
P01701	IGLV1-51	-0.0827116	0.176053	0.837978	Depleted
P31327	CPS1	0.377913	0.176242	0.837978	Depleted
Q99439	CNN2	0.282157	0.176981	0.837978	Depleted
O15335	CHAD	-0.152636	0.178205	0.837978	Depleted
Q6Q788	APOA5	-0.153798	0.178452	0.837978	Depleted
Q9Y287	ITM2B	0.259543	0.179302	0.837978	Depleted
Q14789	GOLGB1	-0.383368	0.180406	0.837978	Depleted
P19022	CDH2	0.156003	0.18078	0.837978	Depleted
P17612	PRKACA	-0.292798	0.181562	0.837978	Depleted
P35813	PPM1A	-0.262609	0.182853	0.837978	Depleted
O95450	ADAMTS2	0.257539	0.182978	0.837978	Depleted
Q6ZNG2	DBX2	-0.278111	0.183138	0.837978	Depleted
P30044	PRDX5	-0.263957	0.18331	0.837978	Depleted
P13727	PRG2	0.16492	0.183585	0.837978	Depleted
P13667	PDIA4	-0.266475	0.184099	0.837978	Depleted
P08237	PFKM	-0.358919	0.18455	0.837978	Depleted
P69905	HBA1	-0.219328	0.185002	0.837978	Depleted
Q14240	EIF4A2	-0.466691	0.185314	0.837978	Depleted
Q96DZ1	ERLEC1	0.252563	0.186262	0.837978	Depleted
Q9BR76	CORO1B	-0.457595	0.186721	0.837978	Depleted
O94973	AP2A2	-0.580088	0.186775	0.837978	Depleted
Q86YN6	PPARGC1B	0.349107	0.187704	0.837978	Depleted
Q9BSL1	UBAC1	0.296044	0.187733	0.837978	Depleted
P54764	EPHA4	0.235956	0.187819	0.837978	Depleted
Q15904	ATP6AP1	0.25901	0.188854	0.837978	Depleted
Q9UK05	GDF2	0.27047	0.189524	0.837978	Depleted
P31949	S100A11	-0.293542	0.18957	0.837978	Depleted
Q15848	ADIPOQ	-0.178888	0.190882	0.837978	Depleted
P28066	PSMA5	-0.164254	0.192146	0.837978	Depleted
P02730	SLC4A1	-0.264601	0.193093	0.837978	Depleted
Q9Y2T3	GDA	-0.217288	0.193583	0.837978	Depleted
P21802	FGFR2	0.313869	0.194478	0.837978	Depleted
Q5T0F9	CC2D1B	-0.305244	0.0174594	0.838554	Olink
Q1L6U9	MSMP	-0.254347	0.0174957	0.838554	Olink
Q12866	MERTK	-0.20814	0.195185	0.839213	Depleted
Q8IV03	LURAP1L	0.296137	0.195834	0.839713	Depleted
Q86UP0	CDH24	-0.208184	0.196331	0.839713	Depleted
P26572	MGAT1	-0.188147	0.198527	0.842684	Depleted
Q9BUT1	BDH2	-0.413498	0.0178766	0.843025	Olink
Q8NBJ4	GOLM1	-0.198833	0.0279398	0.843661	PCA
P62873	GNB1	-0.233245	0.199815	0.846169	Depleted
Q13098	GPS1	-0.509092	0.0321856	0.84864	MagNet
P02748	C9	-0.346904	0.0336877	0.84864	MagNet
P23526	AHCY	-0.624622	0.033723	0.84864	MagNet
P35611	ADD1	-0.475514	0.0341697	0.84864	MagNet
Q6V0I7	FAT4	-0.332987	0.0350254	0.84864	MagNet
P05546	SERPIND1	-0.418411	0.0373561	0.84864	MagNet
Q9NRW1	RAB6B	-0.50815	0.0373907	0.84864	MagNet
Q16643	DBN1	-0.483526	0.0373938	0.84864	MagNet
P11226	MBL2	-0.186868	0.0384524	0.84864	MagNet
Q9NY33	DPP3	0.684687	0.0385475	0.84864	MagNet
Q99999	GAL3ST1	-0.452616	0.0386767	0.84864	MagNet
Q96JM3	CHAMP1	-0.204399	0.0392594	0.84864	MagNet
Q92820	GGH	-0.387944	0.0393631	0.84864	MagNet
Q9HCM4	EPB41L5	-0.320559	0.0420405	0.84864	MagNet
P27169	PON1	-0.237977	0.0433757	0.84864	MagNet
P01889	HLA-B	-0.485432	0.0436234	0.84864	MagNet
P12830	CDH1	-0.374813	0.0437628	0.84864	MagNet
P0CG47	UBB	-0.388975	0.0440199	0.84864	MagNet
Q99798	ACO2	-0.554208	0.0442272	0.84864	MagNet
P09871	C1S	-0.433256	0.0444177	0.84864	MagNet
P41240	CSK	-0.278857	0.202126	0.849099	Depleted
Q9ULB1	NRXN1	-0.259723	0.202748	0.849099	Depleted
P10451	SPP1	0.212074	0.203018	0.849099	Depleted
P05186	ALPL	-0.164742	0.203519	0.849416	Depleted
Q9Y646	CPQ	0.100368	0.467897	0.850869	Neat
Q9Y2T4	PPP2R2C	0.269011	0.205084	0.85091	Depleted
Q562R1	ACTBL2	-0.277538	0.205134	0.85091	Depleted
P24158	PRTN3	-0.310034	0.207489	0.85091	Depleted
Q5TFQ8	SIRPB1	0.30074	0.208753	0.85091	Depleted
P11684	SCGB1A1	-0.30141	0.209956	0.85091	Depleted
P05981	HPN	-0.220289	0.210344	0.85091	Depleted
Q9Y570	PPME1	0.296396	0.210541	0.85091	Depleted
Q9NTN9	SEMA4G	-0.253136	0.211113	0.85091	Depleted
Q9ULI4	KIF26A	0.613795	0.211182	0.85091	Depleted
P07451	CA3	-0.182922	0.211311	0.85091	Depleted
P01903	HLA-DRA	-0.382823	0.21156	0.85091	Depleted
P20062	TCN2	-0.211583	0.21168	0.85091	Depleted
Q8IUI8	CRLF3	0.580882	0.211973	0.85091	Depleted
Q96C24	SYTL4	-0.545229	0.213956	0.85091	Depleted
Q9BRR6	ADPGK	-0.299549	0.215667	0.85091	Depleted
Q5FWF5	ESCO1	-0.256075	0.21571	0.85091	Depleted
Q13237	PRKG2	-0.21735	0.215871	0.85091	Depleted
Q02809	PLOD1	0.211594	0.216266	0.85091	Depleted
O95837	GNA14	-0.249525	0.217783	0.85091	Depleted
Q96RW7	HMCN1	-0.152861	0.218548	0.85091	Depleted
Q6X4W1	NSMF	0.41396	0.218696	0.85091	Depleted
O14773	TPP1	0.291284	0.219444	0.85091	Depleted
Q96BQ1	FAM3D	0.405969	0.219603	0.85091	Depleted
P68871	HBB	-0.201722	0.219848	0.85091	Depleted
P26639	TARS1	-0.42608	0.220085	0.85091	Depleted
P28161	GSTM2	-0.251814	0.220639	0.851401	Depleted
P06744	GPI	-0.176602	0.222084	0.851471	Depleted
A0A075B6R9	IGKV2D-24	-0.0728987	0.222371	0.851471	Depleted
P09326	CD48	0.237912	0.222631	0.851471	Depleted
B2RN74	OR11H12	-0.283399	0.22308	0.851471	Depleted
P02774	GC	0.101191	0.473304	0.851608	Neat
Q15223	NECTIN1	-0.148697	0.476223	0.851743	Neat
P24534	EEF1B2	-0.289286	0.225245	0.855931	Depleted
P02144	MB	0.15034	0.226815	0.85986	Depleted
P32004	L1CAM	-0.135101	0.228122	0.85986	Depleted
O00151	PDLIM1	-0.231019	0.228631	0.85986	Depleted
P48723	HSPA13	-0.152156	0.228779	0.85986	Depleted
P61328	FGF12	-0.344573	0.22955	0.860212	Depleted
Q92800	EZH1	-0.685926	0.230085	0.860212	Depleted
P69891	HBG1	-0.199321	0.230252	0.860212	Depleted
P62760	VSNL1	-0.298811	0.0185428	0.86074	Olink
P98160	HSPG2	0.42313	0.0188886	0.86074	Olink
P01562	IFNA1	-0.497513	0.0190426	0.86074	Olink
Q9NYZ4	SIGLEC8	-0.193309	0.0195197	0.86074	Olink
P06850	CRH	0.283962	0.0195948	0.86074	Olink
Q9BXD5	NPL	-0.340965	0.0199806	0.86074	Olink
P19440	GGT1	-0.241371	0.0200771	0.86074	Olink
Q9ULK2	ATXN7L1	-0.372579	0.0201237	0.86074	Olink
Q96I15	SCLY	-0.30092	0.020146	0.86074	Olink
Q9H173	SIL1	-0.218753	0.020825	0.86074	Olink
P29460	IL12A	-0.192939	0.0208561	0.86074	Olink
Q9Y2T7	YBX2	-0.432313	0.0210037	0.86074	Olink
Q96M66	YP010	-0.432154	0.0211087	0.86074	Olink
Q68EM7	ARHGAP17	-0.4923	0.0214191	0.86074	Olink
P01298	PPY	0.197331	0.0215336	0.86074	Olink
Q9BWW9	APOL5	0.370851	0.0216243	0.86074	Olink
Q9Y275	TNFSF13B	-0.281909	0.0217773	0.86074	Olink
Q8N6Q3	CD177	-0.116613	0.0218425	0.86074	Olink
P61457	PCBD1	-0.376354	0.0219249	0.86074	Olink
P17813	ENG	0.367824	0.0220926	0.86074	Olink
O75077	ADAM23	0.208817	0.0221139	0.86074	Olink
Q03167	TGFBR3	0.400255	0.0222489	0.86074	Olink
Q8N743	KIR3DL3	-0.50774	0.02243	0.86074	Olink
Q2VWP7	PRTG	0.28839	0.0227138	0.86074	Olink
Q6UXB4	CLEC4G	-0.421737	0.0227369	0.86074	Olink
Q9HC56	PCDH9	0.311553	0.0229809	0.86074	Olink
P20783	NTF3	0.347232	0.0232171	0.86074	Olink
A6NGS2	ERICH4	-0.14893	0.0232894	0.86074	Olink
Q8TD26	CHD6	-0.434937	0.023362	0.86074	Olink
O75023	LILRB5	-0.0925702	0.23084	0.860798	Depleted
P01780	IGHV3-7	-0.0968724	0.231393	0.861167	Depleted
Q6GTS8	PM20D1	-0.104601	0.233319	0.863582	Depleted
O95479	H6PD	-0.0947427	0.234323	0.864008	Depleted
P08473	MME	-0.235957	0.234521	0.864008	Depleted
Q9P227	ARHGAP23	0.0758569	0.48598	0.86407	Neat
Q9H4L5	OSBPL3	-0.130004	0.490251	0.866934	Neat
P80188	LCN2	-0.448551	0.0459142	0.86703	MagNet
Q14623	IHH	0.128422	0.493441	0.868445	Neat
Q9Y279	VSIG4	0.12121	0.493662	0.868445	Neat
A0A075B6S9	IGKV1-37	-0.102572	0.494779	0.868445	Neat
O15394	NCAM2	-0.165997	0.498125	0.868445	Neat
P22894	MMP8	0.145805	0.49892	0.868445	Neat
O15511	ARPC5	-0.235139	0.502858	0.868445	Neat
Q9Y2I9	TBC1D30	-0.053248	0.504602	0.868445	Neat
Q9NS23	RASSF1	0.165566	0.50754	0.868445	Neat
P01591	JCHAIN	-0.0661636	0.514397	0.869176	Neat
P54802	NAGLU	-0.0662917	0.523295	0.869176	Neat
P05181	CYP2E1	-0.22879	0.528484	0.869176	Neat
Q16563	SYPL1	0.104153	0.529027	0.869176	Neat
B4DXR9	ZNF732	0.15876	0.529343	0.869176	Neat
P07738	BPGM	-0.139357	0.530014	0.869176	Neat
P29622	SERPINA4	0.0909942	0.53637	0.869176	Neat
Q5JPH6	EARS2	-0.201155	0.542172	0.869176	Neat
Q13232	NME3	0.149177	0.542715	0.869176	Neat
P0DOY3	IGLC3	0.0650048	0.545065	0.869176	Neat
A0A0J9YX35	IGHV3-64D	0.0508807	0.547402	0.870649	Neat
P20933	AGA	-0.115515	0.554761	0.871629	Neat
P09603	CSF1	-0.22821	0.239311	0.873328	Depleted
Q86UX7	FERMT3	-0.237931	0.239642	0.873328	Depleted
Q09328	MGAT5	-0.188477	0.240329	0.873328	Depleted
P07437	TUBB	0.130539	0.564979	0.875524	Neat
O00232	PSMD12	-0.503989	0.0474186	0.877154	MagNet
P16035	TIMP2	-0.437603	0.047595	0.877154	MagNet
Q16698	DECR1	-0.511512	0.0486127	0.877154	MagNet
P10644	PRKAR1A	-0.452602	0.0492356	0.877154	MagNet
Q15166	PON3	-0.204699	0.049691	0.877154	MagNet
P48775	TDO2	0.470608	0.0240964	0.87735	Olink
Q9Y2F9	BTBD3	0.459295	0.0241368	0.87735	Olink
P34913	EPHX2	-0.248596	0.242966	0.877728	Depleted
Q14435	GALNT3	-0.189939	0.243206	0.877728	Depleted
P02042	HBD	-0.195477	0.244637	0.877728	Depleted
Q12913	PTPRJ	-0.230734	0.245098	0.877728	Depleted
P36897	TGFBR1	0.206373	0.24599	0.877728	Depleted
O60568	PLOD3	-0.454495	0.247766	0.877728	Depleted
P48739	PITPNB	0.238304	0.248849	0.87868	Depleted
Q9H2E6	SEMA6A	-0.214487	0.249388	0.879027	Depleted
Q99969	RARRES2	-0.460199	0.0510277	0.879052	MagNet
P00450	CP	-0.313459	0.0539161	0.879052	MagNet
P11021	HSPA5	-0.38312	0.0554095	0.879052	MagNet
P30530	AXL	0.333811	0.0557927	0.879052	MagNet
Q9NRC6	SPTBN5	-0.354768	0.0561161	0.879052	MagNet
P04003	C4BPA	-0.336562	0.0567104	0.879052	MagNet
P30566	ADSL	0.590967	0.0568689	0.879052	MagNet
P05121	SERPINE1	-0.198293	0.0577956	0.879052	MagNet
O00187	MASP2	-0.232889	0.0580466	0.879052	MagNet
Q7LDG7	RASGRP2	-0.40759	0.0580585	0.879052	MagNet
P12273	PIP	0.306031	0.0583346	0.879052	MagNet
P01762	IGHV3-11	-0.0781654	0.576688	0.883084	Neat
P04054	PLA2G1B	-0.296275	0.580911	0.883556	Neat
P99999	CYCS	0.098736	0.595284	0.887532	Neat
Q92876	KLK6	0.145913	0.254508	0.887662	Depleted
O43790	KRT86	-0.343535	0.25511	0.888114	Depleted
O00487	PSMD14	0.322454	0.255528	0.888114	Depleted
P19320	VCAM1	0.131479	0.256785	0.889926	Depleted
P04271	S100B	0.352164	0.259907	0.890918	Depleted
O95274	LYPD3	-0.123988	0.612158	0.891394	Neat
P49765	VEGFB	0.132823	0.62074	0.891394	Neat
P61626	LYZ	0.0648326	0.62388	0.891394	Neat
P20810	CAST	0.240799	0.260963	0.89176	Depleted
P23467	PTPRB	0.252995	0.0310625	0.893318	PCA
P06681	C2	-0.289208	0.0348862	0.893318	PCA
Q01546	KRT76	1.09957	0.0355773	0.893318	PCA
P01703	IGLV1-40	-0.397776	0.0372286	0.893318	PCA
P51460	INSL3	-0.322423	0.0372917	0.893318	PCA
Q9H0E7	USP44	-0.517214	0.0373321	0.893318	PCA
Q3T906	GNPTAB	0.430808	0.0374219	0.893318	PCA
Q6EEV4	POLR2M	0.700115	0.0398439	0.893318	PCA
P08572	COL4A2	0.375576	0.0409884	0.893318	PCA
Q9GZP0	PDGFD	-0.979091	0.0413161	0.893318	PCA
P52565	ARHGDIA	-0.452237	0.0414487	0.893318	PCA
P61353	RPL27	-0.371531	0.0423569	0.893318	PCA
Q6UXB3	LYPD2	-0.54804	0.0432714	0.893318	PCA
Q92542	NCSTN	-0.653247	0.0433345	0.893318	PCA
A0A087WW87	IGKV2-40	0.401408	0.0447753	0.893318	PCA
P01036	CST4	1.09361	0.0449282	0.893318	PCA
A6NFK2	GRXCR2	0.281796	0.0452724	0.893318	PCA
P62328	TMSB4X	-0.428577	0.0460538	0.893318	PCA
P05387	RPLP2	-0.368967	0.0461256	0.893318	PCA
Q96RT8	TUBGCP5	0.485095	0.0483277	0.893318	PCA
P00746	CFD	0.272821	0.0483764	0.893318	PCA
Q9ULC0	EMCN	0.3085	0.0486358	0.893318	PCA
Q9BWP8	COLEC11	-0.294267	0.0492098	0.893318	PCA
Q8NBJ5	COLGALT1	0.413132	0.0501316	0.893318	PCA
P16949	STMN1	-0.487854	0.0503152	0.893318	PCA
P08238	HSP90AB1	-0.679426	0.0504669	0.893318	PCA
O15231	ZNF185	0.699937	0.051884	0.893318	PCA
P21810	BGN	-0.477422	0.0518873	0.893318	PCA
Q9Y4G2	PLEKHM1	0.367569	0.053063	0.893318	PCA
P0DP57	SLURP2	-0.402074	0.0534893	0.893318	PCA
P13646	KRT13	0.467241	0.0539538	0.893318	PCA
P22749	GNLY	0.459746	0.0540258	0.893318	PCA
P07307	ASGR2	-0.340886	0.0557525	0.893318	PCA
P25116	F2R	0.548182	0.0559748	0.893318	PCA
Q8N2W9	PIAS4	-0.387365	0.0570646	0.893318	PCA
Q5KU26	COLEC12	0.309845	0.0587628	0.893318	PCA
Q9GZX9	TWSG1	0.583985	0.060381	0.893318	PCA
P20138	CD33	0.21754	0.0618682	0.893318	PCA
P07858	CTSB	0.310053	0.0622802	0.893318	PCA
P59665	DEFA1	-0.332428	0.0622963	0.893318	PCA
P02765	AHSG	-0.246506	0.0638733	0.893318	PCA
P63104	YWHAZ	0.489762	0.0644673	0.893318	PCA
Q9UBB9	TFIP11	-0.310052	0.0657099	0.893318	PCA
Q9ULF5	SLC39A10	0.45298	0.065997	0.893318	PCA
P20472	PVALB	0.225685	0.066554	0.893318	PCA
O15118	NPC1	0.424373	0.0665756	0.893318	PCA
Q9Y6C2	EMILIN1	0.394078	0.0665894	0.893318	PCA
P0C7I6	CCDC159	-0.44426	0.0671404	0.893318	PCA
O60602	TLR5	-0.233816	0.0682887	0.893318	PCA
Q92673	SORL1	-0.41532	0.0705114	0.893318	PCA
P10074	ZBTB48	-0.198312	0.0707176	0.893318	PCA
Q0IIM8	TBC1D8B	-0.585983	0.0709611	0.893318	PCA
B7ZW38	HNRNPCL3	-0.336976	0.0717131	0.893318	PCA
P52758	RIDA	-0.277342	0.0721575	0.893318	PCA
P09758	TACSTD2	-0.873118	0.0725258	0.893318	PCA
Q14315	FLNC	0.27661	0.0728057	0.893318	PCA
Q13201	MMRN1	0.259817	0.0734545	0.893318	PCA
Q13177	PAK2	0.181553	0.263537	0.895267	Depleted
Q07954	LRP1	-0.169577	0.263616	0.895267	Depleted
Q9Y2G1	MYRF	0.268932	0.264317	0.895267	Depleted
P04180	LCAT	-0.16967	0.266071	0.89804	Depleted
Q3ZCW2	LGALSL	-0.226533	0.266124	0.89804	Depleted
P34130	NTF4	0.255016	0.26729	0.89804	Depleted
O00115	DNASE2	0.222936	0.267304	0.89804	Depleted
O94985	CLSTN1	0.154586	0.267386	0.89804	Depleted
Q8TBE9	NANP	-0.0579748	0.648613	0.899014	Neat
Q32P28	P3H1	-0.0841398	0.658513	0.899014	Neat
P07996	THBS1	0.0949203	0.660387	0.899014	Neat
P42226	STAT6	0.0403697	0.66128	0.899014	Neat
P49747	COMP	-0.0606242	0.661839	0.899014	Neat
Q96H79	ZC3HAV1L	-0.227897	0.269608	0.900314	Depleted
A0A0B4J2D9	IGKV1D-13	0.338665	0.0754665	0.903646	PCA
P41218	MNDA	-0.450866	0.0250836	0.905327	Olink
P12034	FGF5	0.232639	0.0255775	0.905327	Olink
Q9UNE2	RPH3AL	-0.307483	0.025714	0.905327	Olink
Q14002	CEACAM7	-0.476996	0.0260745	0.905327	Olink
P55957	BID	-0.335547	0.272597	0.906384	Depleted
Q9Y5L0	TNPO3	0.184819	0.274648	0.907933	Depleted
P15586	GNS	-0.155841	0.275155	0.907933	Depleted
Q86TY3	ARMH4	0.257001	0.2765	0.907933	Depleted
P61158	ACTR3	-0.217527	0.277126	0.907933	Depleted
P19367	HK1	-0.278884	0.277494	0.907933	Depleted
Q13790	APOF	-0.11822	0.279101	0.907933	Depleted
Q12797	ASPH	0.237875	0.279393	0.907933	Depleted
Q2KHT3	CLEC16A	-0.207362	0.280457	0.907933	Depleted
Q6ICC9	RTL6	-0.580243	0.28145	0.907933	Depleted
P61224	RAP1B	-0.197062	0.28268	0.907933	Depleted
Q9ULD8	KCNH3	0.221531	0.282992	0.907933	Depleted
Q9H9K5	ERVMER34-1	0.176258	0.283195	0.907933	Depleted
P07384	CAPN1	-0.198336	0.286294	0.907933	Depleted
Q99829	CPNE1	0.347105	0.287289	0.907933	Depleted
Q15828	CST6	0.154568	0.287625	0.907933	Depleted
P04156	PRNP	-0.212326	0.287697	0.907933	Depleted
P21333	FLNA	-0.203895	0.289096	0.907933	Depleted
P36507	MAP2K2	0.296373	0.28966	0.907933	Depleted
P20061	TCN1	0.125056	0.290501	0.907933	Depleted
Q14651	PLS1	-0.2093	0.290957	0.907933	Depleted
P61026	RAB10	-0.199837	0.290984	0.907933	Depleted
O75339	CILP	0.159888	0.292184	0.907933	Depleted
P58166	INHBE	-0.143741	0.292324	0.907933	Depleted
P04090	RLN2	0.256028	0.292809	0.907933	Depleted
O75969	AKAP3	0.283329	0.293243	0.907933	Depleted
Q01581	HMGCS1	0.279366	0.293389	0.907933	Depleted
Q9Y6N6	LAMC3	0.246234	0.29492	0.907933	Depleted
P68036	UBE2L3	0.228186	0.294999	0.907933	Depleted
Q96KG7	MEGF10	-0.276209	0.295026	0.907933	Depleted
Q15404	RSU1	-0.205953	0.295172	0.907933	Depleted
Q8NCC3	PLA2G15	-0.139385	0.295363	0.907933	Depleted
P22004	BMP6	0.67484	0.0610316	0.908561	MagNet
Q8N755	SLC66A3	0.873939	0.0621038	0.908561	MagNet
Q0ZGT2	NEXN	-0.400673	0.0632188	0.908561	MagNet
Q6PGP7	SKIC3	-0.206208	0.296301	0.909415	Depleted
O15143	ARPC1B	-0.210748	0.298383	0.910076	Depleted
P11362	FGFR1	0.172263	0.29861	0.910076	Depleted
Q8N8Z6	DCBLD1	0.22071	0.299198	0.910076	Depleted
Q969P5	FBXO32	0.313415	0.299709	0.910076	Depleted
P06315	IGKV5-2	-0.042331	0.685121	0.911815	Neat
P60900	PSMA6	-0.152033	0.301211	0.912654	Depleted
Q96Q45	TMEM237	-0.19954	0.301473	0.912654	Depleted
P24855	DNASE1	-0.130752	0.302397	0.914034	Depleted
P38484	IFNGR2	-0.165473	0.0265264	0.915078	Olink
P12931	SRC	-0.191306	0.305193	0.91554	Depleted
P16152	CBR1	-0.184069	0.305667	0.91554	Depleted
Q8TD06	AGR3	-0.167316	0.305803	0.91554	Depleted
Q13616	CUL1	0.24111	0.30675	0.91554	Depleted
Q9H609	ZNF576	-0.222411	0.309204	0.91554	Depleted
Q5SYB0	FRMPD1	0.186957	0.310334	0.91554	Depleted
P06865	HEXA	-0.114924	0.31061	0.91554	Depleted
P22392	NME2	0.234512	0.311457	0.91554	Depleted
Q6UWY5	OLFML1	-0.276594	0.311605	0.91554	Depleted
P78344	EIF4G2	0.387025	0.313989	0.915831	Depleted
O43915	VEGFD	0.245979	0.314487	0.915831	Depleted
Q92692	NECTIN2	-0.209446	0.314935	0.915831	Depleted
O00602	FCN1	0.165326	0.315146	0.915831	Depleted
P22748	CA4	0.204666	0.315205	0.915831	Depleted
Q15746	MYLK	-0.19122	0.316602	0.915831	Depleted
P42025	ACTR1B	0.317019	0.317053	0.915831	Depleted
P12110	COL6A2	0.160091	0.317294	0.915831	Depleted
Q08ET2	SIGLEC14	-0.100767	0.317506	0.915831	Depleted
Q9GZN8	ADISSP	-0.201604	0.31859	0.915831	Depleted
P01034	CST3	0.253892	0.0776421	0.916728	PCA
P14778	IL1R1	-0.242443	0.0790675	0.916728	PCA
Q8TEM1	NUP210	0.308017	0.079199	0.916728	PCA
P48643	CCT5	-0.423733	0.0648273	0.919281	MagNet
Q8N1N4	KRT78	-0.947178	0.0656658	0.919281	MagNet
P26927	MST1	-0.25237	0.0657373	0.919281	MagNet
Q9BXS5	AP1M1	0.600495	0.066229	0.919281	MagNet
Q16853	AOC3	-0.123162	0.321155	0.919854	Depleted
P22413	ENPP1	-0.190019	0.321373	0.919854	Depleted
A0A5B6	TRBV28	0.277986	0.0671055	0.919985	MagNet
O14498	ISLR	0.380663	0.0677444	0.919985	MagNet
P04792	HSPB1	-0.447216	0.0680058	0.919985	MagNet
Q15006	EMC2	-1.06061	0.0693171	0.919985	MagNet
P05198	EIF2S1	0.465791	0.0718476	0.919985	MagNet
P61201	COPS2	-0.422753	0.0729567	0.919985	MagNet
Q27J81	INF2	-0.452428	0.0743735	0.919985	MagNet
Q08174	PCDH1	-0.354371	0.0754407	0.919985	MagNet
Q8NBS9	TXNDC5	-0.37954	0.075933	0.919985	MagNet
Q16401	PSMD5	-0.409304	0.0767813	0.919985	MagNet
O76061	STC2	-0.268926	0.076918	0.919985	MagNet
Q9Y613	FHOD1	-0.454108	0.0788844	0.919985	MagNet
Q06830	PRDX1	-0.378291	0.0793542	0.919985	MagNet
P39060	COL18A1	-0.256266	0.0798094	0.919985	MagNet
Q13477	MADCAM1	-0.220344	0.0807081	0.919985	MagNet
O00533	CHL1	-0.273697	0.0807836	0.919985	MagNet
Q6DHV5	CC2D2B	-0.641156	0.0816546	0.919985	MagNet
O15371	EIF3D	-0.968722	0.0824878	0.919985	MagNet
O00560	SDCBP	-0.385809	0.0826497	0.919985	MagNet
Q9NQC3	RTN4	-0.391068	0.0834669	0.919985	MagNet
P35030	PRSS3	-0.319529	0.0835976	0.919985	MagNet
O43182	ARHGAP6	-0.513408	0.0838868	0.919985	MagNet
Q9H9B4	SFXN1	0.625858	0.0841441	0.919985	MagNet
P52566	ARHGDIB	0.471125	0.084559	0.919985	MagNet
Q14289	PTK2B	0.349355	0.0862322	0.919985	MagNet
P08709	F7	-0.293107	0.0865187	0.919985	MagNet
Q8N365	CIART	-0.484914	0.0865291	0.919985	MagNet
P13987	CD59	-0.418688	0.0872619	0.919985	MagNet
Q9BVK6	TMED9	-0.475	0.0878877	0.919985	MagNet
P51809	VAMP7	0.783233	0.0882183	0.919985	MagNet
P01817	IGHV2-5	-0.423786	0.0896733	0.919985	MagNet
Q9UNL4	ING4	0.506624	0.090153	0.919985	MagNet
A0A0C4DH67	IGKV1-8	0.195618	0.0912534	0.919985	MagNet
Q92973	TNPO1	-0.693344	0.0922427	0.919985	MagNet
Q7Z388	DPY19L4	-0.541727	0.0929096	0.919985	MagNet
Q8IXL6	FAM20C	-0.31866	0.0935558	0.919985	MagNet
Q9H6X2	ANTXR1	0.318495	0.0943523	0.919985	MagNet
P80108	GPLD1	-0.170639	0.0954404	0.919985	MagNet
Q9BUL8	PDCD10	-0.48004	0.0960372	0.919985	MagNet
Q92496	CFHR4	-0.205519	0.0964565	0.919985	MagNet
Q6IAA8	LAMTOR1	-0.543488	0.097186	0.919985	MagNet
Q6YHK3	CD109	-0.201834	0.0973545	0.919985	MagNet
P40926	MDH2	-0.347979	0.0974586	0.919985	MagNet
Q9NY65	TUBA8	-0.351397	0.0988237	0.919985	MagNet
P02461	COL3A1	0.387616	0.0999284	0.919985	MagNet
Q14247	CTTN	-0.363061	0.100462	0.919985	MagNet
Q13045	FLII	-0.429162	0.100773	0.919985	MagNet
P42566	EPS15	-0.395274	0.10089	0.919985	MagNet
Q9Y2A7	NCKAP1	-0.51855	0.102359	0.919985	MagNet
P54619	PRKAG1	-0.366143	0.103251	0.919985	MagNet
Q15063	POSTN	-0.249187	0.103353	0.919985	MagNet
P11586	MTHFD1	0.462459	0.105993	0.919985	MagNet
P07602	PSAP	0.330491	0.10644	0.919985	MagNet
P14324	FDPS	-0.426507	0.107007	0.919985	MagNet
P09543	CNP	-0.550987	0.107822	0.919985	MagNet
Q9BUD6	SPON2	-0.381423	0.108494	0.919985	MagNet
Q9UBX1	CTSF	0.230422	0.108548	0.919985	MagNet
Q96LT7	C9orf72	-0.317567	0.109443	0.919985	MagNet
P30101	PDIA3	-0.319513	0.109573	0.919985	MagNet
P35237	SERPINB6	0.48966	0.111027	0.919985	MagNet
P07900	HSP90AA1	-0.31835	0.111265	0.919985	MagNet
Q6UXD5	SEZ6L2	-0.361689	0.111567	0.919985	MagNet
P23381	WARS1	-0.383145	0.111837	0.919985	MagNet
P49257	LMAN1	-0.315955	0.111908	0.919985	MagNet
Q86YW5	TREML1	-0.465064	0.112867	0.919985	MagNet
Q02818	NUCB1	-0.25243	0.116254	0.919985	MagNet
Q8N414	PGBD5	0.489884	0.117108	0.919985	MagNet
P14868	DARS1	-0.421917	0.117198	0.919985	MagNet
O14818	PSMA7	-0.207844	0.117258	0.919985	MagNet
Q9Y6V0	PCLO	-0.330899	0.11763	0.919985	MagNet
O95721	SNAP29	-0.578915	0.117711	0.919985	MagNet
Q9HCK0	ZBTB26	-0.261622	0.118172	0.919985	MagNet
Q9UN70	PCDHGC3	-0.316094	0.1192	0.919985	MagNet
Q16762	TST	0.645089	0.119309	0.919985	MagNet
Q9P2Y5	UVRAG	-0.294359	0.119798	0.919985	MagNet
P12318	FCGR2A	0.429502	0.120327	0.919985	MagNet
P47929	LGALS7	-0.514687	0.120608	0.919985	MagNet
Q6PFW1	PPIP5K1	-0.314485	0.121876	0.919985	MagNet
Q6XPS3	TPTE2	-0.334952	0.121919	0.919985	MagNet
Q9BZQ8	NIBAN1	-0.436104	0.123328	0.919985	MagNet
Q9UKK3	PARP4	-0.31346	0.123823	0.919985	MagNet
Q9HBB8	CDHR5	-0.387438	0.124612	0.919985	MagNet
A0A075B6K6	IGLV4-3	-0.698477	0.124813	0.919985	MagNet
P40763	STAT3	-0.544484	0.125123	0.919985	MagNet
Q5T0L3	SPATA46	-0.377758	0.126424	0.919985	MagNet
Q9NVA2	SEPTIN11	-0.391919	0.128018	0.919985	MagNet
P21291	CSRP1	-0.351796	0.128796	0.919985	MagNet
P20618	PSMB1	-0.210137	0.129979	0.919985	MagNet
Q96MT3	PRICKLE1	-0.287957	0.130986	0.919985	MagNet
P01766	IGHV3-13	0.156367	0.131831	0.919985	MagNet
P39748	FEN1	-0.225929	0.131951	0.919985	MagNet
Q8N128	FAM177A1	-0.321085	0.132175	0.919985	MagNet
A0FGR8	ESYT2	0.524109	0.133018	0.919985	MagNet
P00748	F12	-0.212778	0.13366	0.919985	MagNet
Q9H3N1	TMX1	-0.419345	0.134342	0.919985	MagNet
O60240	PLIN1	0.197955	0.13468	0.919985	MagNet
P39059	COL15A1	0.286868	0.134947	0.919985	MagNet
Q7Z5L7	PODN	0.235766	0.135392	0.919985	MagNet
P09960	LTA4H	-0.0615924	0.322428	0.921467	Depleted
P26885	FKBP2	-0.200823	0.324138	0.923771	Depleted
O75531	BANF1	-0.26708	0.325148	0.923771	Depleted
Q14112	NID2	0.189686	0.326224	0.923771	Depleted
Q7Z7M9	GALNT5	0.137275	0.326505	0.923771	Depleted
P51452	DUSP3	0.227577	0.326909	0.923771	Depleted
Q8NEM7	SUPT20H	0.0740247	0.32805	0.925686	Depleted
Q93063	EXT2	-0.101728	0.702507	0.926776	Neat
P01624	IGKV3-15	-0.0499666	0.711926	0.926918	Neat
Q9P2S5	WRAP73	0.0495286	0.712857	0.926918	Neat
O60844	ZG16	0.150172	0.330576	0.929692	Depleted
Q8N392	ARHGAP18	0.202834	0.33069	0.929692	Depleted
Q9H2X9	SLC12A5	0.209257	0.332135	0.929692	Depleted
O95373	IPO7	0.299108	0.332729	0.929692	Depleted
Q8NI99	ANGPTL6	0.0918102	0.333743	0.929692	Depleted
P25311	AZGP1	0.139371	0.334559	0.929692	Depleted
Q68CP9	ARID2	-0.257425	0.334596	0.929692	Depleted
P54920	NAPA	0.32326	0.336647	0.929692	Depleted
P02810	PRH1	-0.196754	0.337802	0.929692	Depleted
P16870	CPE	0.216254	0.338263	0.929692	Depleted
P60891	PRPS1	-0.218714	0.338716	0.929692	Depleted
Q9UBW5	BIN2	0.196648	0.339702	0.929692	Depleted
P80748	IGLV3-21	0.168356	0.340188	0.929692	Depleted
P01011	SERPINA3	0.139962	0.341144	0.930655	Depleted
P00492	HPRT1	-0.166213	0.341473	0.930655	Depleted
A0A087WSX0	IGLV5-45	-0.169388	0.342368	0.93182	Depleted
Q8NFG4	FLCN	-0.484769	0.027194	0.932167	Olink
Q6UWL2	SUSD1	0.345888	0.0812555	0.932759	PCA
P54296	MYOM2	0.192293	0.343392	0.933334	Depleted
Q8N6M5	ALLC	-0.206993	0.344016	0.933757	Depleted
P0CG23	ZNF853	-0.023764	0.739033	0.939361	Neat
P98066	TNFAIP6	-0.169429	0.348127	0.939388	Depleted
Q9GZY0	NXF2	0.247345	0.348445	0.939388	Depleted
P42574	CASP3	0.251129	0.349661	0.940154	Depleted
P52888	THOP1	0.191854	0.349671	0.940154	Depleted
P07358	C8B	-0.230825	0.141078	0.943157	MagNet
Q9NU02	ANKEF1	-0.380482	0.141724	0.943157	MagNet
P20340	RAB6A	-0.325471	0.144075	0.943157	MagNet
A0A075B6J2	IGLV2-33	-0.177399	0.144652	0.943157	MagNet
P01721	IGLV6-57	-0.152452	0.144927	0.943157	MagNet
Q9H4M9	EHD1	-0.304897	0.145017	0.943157	MagNet
O95715	CXCL14	0.808639	0.14579	0.943157	MagNet
O95782	AP2A1	0.399783	0.146707	0.943157	MagNet
P38606	ATP6V1A	-0.429979	0.147878	0.943157	MagNet
P07357	C8A	-0.207361	0.14844	0.943157	MagNet
Q99542	MMP19	0.1815	0.149208	0.943157	MagNet
P38117	ETFB	-0.573309	0.149554	0.943157	MagNet
Q86X29	LSR	-0.286847	0.151194	0.943157	MagNet
P10809	HSPD1	-0.325389	0.151418	0.943157	MagNet
P07954	FH	-0.607571	0.151546	0.943157	MagNet
P48509	CD151	0.400751	0.151596	0.943157	MagNet
O00329	PIK3CD	0.281961	0.152564	0.943157	MagNet
Q9NY97	B3GNT2	0.298247	0.153033	0.943157	MagNet
Q9HAV0	GNB4	-0.410686	0.155786	0.943157	MagNet
P00403	MT-CO2	0.609235	0.15682	0.943157	MagNet
P26641	EEF1G	-0.310614	0.157813	0.943157	MagNet
O14980	XPO1	0.709284	0.158507	0.943157	MagNet
P28070	PSMB4	-0.229699	0.158694	0.943157	MagNet
P51797	CLCN6	-0.253315	0.161464	0.943157	MagNet
O15145	ARPC3	-0.304299	0.162196	0.943157	MagNet
Q9UDY2	TJP2	-0.315347	0.162745	0.943157	MagNet
Q14644	RASA3	-0.32653	0.164673	0.943157	MagNet
Q01433	AMPD2	-0.374528	0.166518	0.943157	MagNet
P16671	CD36	-0.280694	0.16772	0.943157	MagNet
P23528	CFL1	-0.288221	0.168374	0.943157	MagNet
Q9NR46	SH3GLB2	0.685236	0.169036	0.943157	MagNet
Q8NBX0	SCCPDH	-0.465426	0.169931	0.943157	MagNet
P51693	APLP1	0.234556	0.169956	0.943157	MagNet
P01042	KNG1	-0.268503	0.170575	0.943157	MagNet
P00488	F13A1	-0.218677	0.170966	0.943157	MagNet
O00139	KIF2A	-0.318175	0.171	0.943157	MagNet
Q9BXR6	CFHR5	-0.184525	0.172436	0.943157	MagNet
P63092	GNAS	0.367822	0.173631	0.943157	MagNet
Q5K651	SAMD9	0.717732	0.174468	0.943157	MagNet
P27797	CALR	-0.22385	0.174532	0.943157	MagNet
Q15052	ARHGEF6	0.765177	0.175135	0.943157	MagNet
P39656	DDOST	-0.390447	0.176827	0.943157	MagNet
O75935	DCTN3	-0.319682	0.178531	0.943157	MagNet
Q9Y277	VDAC3	-0.280903	0.178969	0.943157	MagNet
P00451	F8	-0.158379	0.179463	0.943157	MagNet
P15169	CPN1	-0.214468	0.180836	0.943157	MagNet
O75955	FLOT1	-0.302749	0.181194	0.943157	MagNet
P13796	LCP1	-0.234515	0.181808	0.943157	MagNet
P0DTL4	LY6S	0.345861	0.183231	0.943157	MagNet
O00154	ACOT7	0.440987	0.18335	0.943157	MagNet
P50502	ST13	-0.269213	0.183459	0.943157	MagNet
P14317	HCLS1	-0.391813	0.183844	0.943157	MagNet
P18054	ALOX12	-0.367973	0.184747	0.943157	MagNet
A0A0A0MS15	IGHV3-49	-0.108474	0.186517	0.943157	MagNet
Q9NR99	MXRA5	-0.179054	0.187701	0.943157	MagNet
P04899	GNAI2	-0.288375	0.188305	0.943157	MagNet
P18577	RHCE	-0.295406	0.189693	0.943157	MagNet
P01133	EGF	-0.379867	0.190824	0.943157	MagNet
Q9NTJ5	SACM1L	-0.303938	0.191102	0.943157	MagNet
Q96N46	TTC14	-0.253027	0.192132	0.943157	MagNet
Q13464	ROCK1	0.396629	0.192497	0.943157	MagNet
Q8IWA5	SLC44A2	-0.320353	0.198016	0.943157	MagNet
Q6UW49	SPESP1	0.430373	0.199374	0.943157	MagNet
P00505	GOT2	-0.523225	0.199977	0.943157	MagNet
P24539	ATP5PB	-0.488383	0.201121	0.943157	MagNet
Q08495	DMTN	-0.2804	0.202049	0.943157	MagNet
Q9Y2Q3	GSTK1	-0.397474	0.203231	0.943157	MagNet
Q05655	PRKCD	0.432024	0.2041	0.943157	MagNet
P31323	PRKAR2B	-0.430122	0.204589	0.943157	MagNet
Q9UKM7	MAN1B1	0.256298	0.204598	0.943157	MagNet
P68104	EEF1A1	-0.274465	0.205337	0.943157	MagNet
P07585	DCN	0.208346	0.207658	0.943157	MagNet
P24557	TBXAS1	-0.277111	0.207986	0.943157	MagNet
Q99435	NELL2	-0.268299	0.208399	0.943157	MagNet
Q16706	MAN2A1	-0.230039	0.208787	0.943157	MagNet
A0A0B4J1X8	IGHV3-43	0.157669	0.209904	0.943157	MagNet
P11171	EPB41	-0.251244	0.210693	0.943157	MagNet
A0A2R8Y619	H2BK1	0.26558	0.211382	0.943157	MagNet
P43405	SYK	0.308424	0.211759	0.943157	MagNet
Q14571	ITPR2	0.755534	0.212574	0.943157	MagNet
P13473	LAMP2	-0.355118	0.212813	0.943157	MagNet
P30273	FCER1G	-0.272103	0.213392	0.943157	MagNet
P14314	PRKCSH	-0.196736	0.21371	0.943157	MagNet
P48960	ADGRE5	-0.284549	0.214532	0.943157	MagNet
Q9H3U1	UNC45A	-0.286546	0.215096	0.943157	MagNet
Q14517	FAT1	-0.14664	0.21554	0.943157	MagNet
Q9BT78	COPS4	-0.282369	0.21602	0.943157	MagNet
A5D6W6	FITM1	-0.203359	0.216026	0.943157	MagNet
Q14677	CLINT1	-0.383189	0.218078	0.943157	MagNet
Q08043	ACTN3	0.222573	0.219441	0.943157	MagNet
Q05397	PTK2	-0.810633	0.220182	0.943157	MagNet
P49720	PSMB3	-0.184761	0.220385	0.943157	MagNet
P05556	ITGB1	-0.264744	0.220577	0.943157	MagNet
P49368	CCT3	-0.263194	0.221043	0.943157	MagNet
O75915	ARL6IP5	-0.30149	0.221401	0.943157	MagNet
Q9H2K8	TAOK3	0.470671	0.221402	0.943157	MagNet
O15533	TAPBP	-0.408343	0.223585	0.943157	MagNet
A0A0A0MT36	IGKV6D-21	0.113363	0.223841	0.943157	MagNet
P61160	ACTR2	-0.260732	0.224219	0.943157	MagNet
P15924	DSP	-0.331648	0.224345	0.943157	MagNet
P27708	CAD	-0.98939	0.224476	0.943157	MagNet
Q9Y4L1	HYOU1	-0.248591	0.224706	0.943157	MagNet
P20701	ITGAL	-0.315592	0.224755	0.943157	MagNet
P13591	NCAM1	-0.326171	0.0277037	0.943668	Olink
Q1MX18	INSC	-0.907474	0.0833877	0.944699	PCA
Q0VAF6	SYCN	-0.294443	0.0836558	0.944699	PCA
Q13075	NAIP	-0.153121	0.353085	0.945497	Depleted
P54289	CACNA2D1	-0.0768805	0.354015	0.945497	Depleted
A0A0J9YXX1	IGHV5-10-1	-0.0641729	0.354061	0.945497	Depleted
P15289	ARSA	-0.149976	0.354273	0.945497	Depleted
Q8WYK0	ACOT12	-0.161166	0.354502	0.945497	Depleted
P04040	CAT	-0.25974	0.22849	0.945675	MagNet
P30048	PRDX3	-0.271961	0.229292	0.945675	MagNet
Q02108	GUCY1A1	0.396172	0.229671	0.945675	MagNet
P49593	PPM1F	0.255501	0.230394	0.945675	MagNet
P22223	CDH3	-0.314228	0.230596	0.945675	MagNet
O75223	GGCT	0.209982	0.355331	0.946443	Depleted
P04196	HRG	0.0946434	0.35586	0.946568	Depleted
P49915	GMPS	-0.16218	0.357182	0.946568	Depleted
Q9NS84	CHST7	-0.136752	0.3581	0.946568	Depleted
Q8NFY4	SEMA6D	-0.205419	0.358715	0.946568	Depleted
P55268	LAMB2	0.156131	0.359623	0.946568	Depleted
Q53RD9	FBLN7	-0.145467	0.359862	0.946568	Depleted
P03971	AMH	-0.122937	0.360123	0.946568	Depleted
O15287	FANCG	0.0333716	0.773704	0.946625	Neat
P01699	IGLV1-44	0.0306558	0.77834	0.946625	Neat
Q14691	GINS1	0.107658	0.782315	0.946625	Neat
A0A087WSZ0	IGKV1D-8	-0.0306738	0.786056	0.946625	Neat
P46459	NSF	-0.204463	0.231885	0.948528	MagNet
Q969T9	WBP2	0.457615	0.232459	0.948528	MagNet
Q8NBZ9	NEXN-AS1	-0.445373	0.0284148	0.948691	Olink
A6NFN3	RBFOX3	0.315713	0.0287388	0.948691	Olink
Q96B86	RGMA	0.28183	0.0289177	0.948691	Olink
Q10571	MN1	-0.360459	0.0291849	0.948691	Olink
Q9UJG1	MOSPD1	0.43628	0.0293146	0.948691	Olink
P21583	KITLG	0.341068	0.0298987	0.948691	Olink
Q7L590	MCM10	0.43815	0.0299465	0.948691	Olink
Q2L4Q9	PRSS53	-0.195007	0.0299803	0.948691	Olink
P08254	MMP3	0.29383	0.0300271	0.948691	Olink
O75475	PSIP1	-0.336493	0.0300756	0.948691	Olink
Q96PX6	CCDC85A	0.306967	0.03021	0.948691	Olink
Q6ZWK4	RHEX	-0.439964	0.0304696	0.948691	Olink
P28845	HSD11B1	0.201283	0.0308225	0.948691	Olink
P21860	ERBB3	-0.29468	0.0308472	0.948691	Olink
P09564	CD7	-0.285667	0.0308719	0.948691	Olink
P56279	TCL1A	-0.135533	0.0308788	0.948691	Olink
P20273	CD22	-0.227083	0.0310041	0.948691	Olink
O75947	ATP5PD	0.421208	0.0311794	0.948695	Olink
A0A075B6H9	IGLV4-69	0.527326	0.0854182	0.94922	PCA
Q9P0S2	COX16	0.478063	0.0863413	0.94922	PCA
P08138	NGFR	0.406501	0.0880242	0.94922	PCA
O60888	CUTA	-0.280615	0.088243	0.94922	PCA
O15354	GPR37	-0.513319	0.0885086	0.94922	PCA
P55103	INHBC	-0.354506	0.0888399	0.94922	PCA
P09488	GSTM1	0.31435	0.362956	0.949888	Depleted
O95025	SEMA3D	-0.733334	0.362973	0.949888	Depleted
Q5TDH0	DDI2	-0.179688	0.363116	0.949888	Depleted
Q9H0R4	HDHD2	-0.206296	0.364261	0.949888	Depleted
Q96C23	GALM	-0.219518	0.364366	0.949888	Depleted
Q9UKV8	AGO2	0.271882	0.365906	0.949888	Depleted
P01593	IGKV1D-33	0.23135	0.366784	0.949888	Depleted
B2RNN3	C1QTNF9B	-0.129734	0.36706	0.949888	Depleted
Q9NQ38	SPINK5	0.146381	0.369176	0.949888	Depleted
P00995	SPINK1	0.20415	0.370969	0.949888	Depleted
Q9Y3I1	FBXO7	-0.238387	0.372365	0.949888	Depleted
P29323	EPHB2	-0.23229	0.372481	0.949888	Depleted
Q9BZF2	OSBPL7	0.172187	0.37408	0.949888	Depleted
Q5ZPR3	CD276	-0.184639	0.374236	0.949888	Depleted
P10646	TFPI	0.127339	0.377136	0.949888	Depleted
P31946	YWHAB	-0.162489	0.377983	0.949888	Depleted
Q16674	MIA	-0.157117	0.378397	0.949888	Depleted
Q8IXP5	POU2AF2	0.169767	0.380394	0.949888	Depleted
Q06828	FMOD	-0.177818	0.380942	0.949888	Depleted
Q9H4B0	OSGEPL1	0.131058	0.381682	0.949888	Depleted
O00468	AGRN	-0.111593	0.381738	0.949888	Depleted
Q6P988	NOTUM	-0.185243	0.38241	0.949888	Depleted
P09619	PDGFRB	0.0823331	0.382761	0.949888	Depleted
O95336	PGLS	-0.168119	0.383817	0.949888	Depleted
Q6UXH0	ANGPTL8	0.134268	0.384887	0.949888	Depleted
Q92598	HSPH1	-0.14676	0.385351	0.949888	Depleted
Q7L014	DDX46	0.171884	0.389103	0.949888	Depleted
Q92530	PSMF1	0.199131	0.389308	0.949888	Depleted
P35475	IDUA	-0.22404	0.390332	0.949888	Depleted
P10153	RNASE2	0.15716	0.391133	0.949888	Depleted
O95989	NUDT3	0.331171	0.392781	0.949888	Depleted
A2AJT9	BCLAF3	0.203797	0.394227	0.949888	Depleted
P31948	STIP1	-0.18316	0.394513	0.949888	Depleted
P04908	H2AC4	-0.321141	0.395307	0.949888	Depleted
P53804	TTC3	-0.0867562	0.399101	0.949888	Depleted
P54725	RAD23A	0.179644	0.400306	0.949888	Depleted
P28074	PSMB5	-0.131704	0.401853	0.949888	Depleted
Q7Z5L0	VMO1	0.0916104	0.404453	0.949888	Depleted
P22102	GART	0.342999	0.404566	0.949888	Depleted
P55899	FCGRT	0.152402	0.405064	0.949888	Depleted
Q8WUA8	TSKU	-0.164563	0.406613	0.949888	Depleted
P52907	CAPZA1	-0.177524	0.409246	0.949888	Depleted
P40967	PMEL	-0.132104	0.410455	0.949888	Depleted
Q9ULD5	ZNF777	-0.504031	0.411609	0.949888	Depleted
A0A0C4DH35	IGHV3-35	0.311285	0.41196	0.949888	Depleted
P17900	GM2A	0.164374	0.412845	0.949888	Depleted
P25054	APC	-0.137115	0.413734	0.949888	Depleted
Q16610	ECM1	0.123249	0.414914	0.949888	Depleted
Q5VSL9	STRIP1	0.146174	0.418019	0.949888	Depleted
Q86V21	AACS	-0.220977	0.418023	0.949888	Depleted
Q6ZRP7	QSOX2	-0.0762535	0.418253	0.949888	Depleted
Q96FG2	ELMOD3	0.168526	0.423656	0.949888	Depleted
P98187	CYP4F8	0.353941	0.42599	0.949888	Depleted
P04920	SLC4A2	0.4197	0.427359	0.949888	Depleted
P45877	PPIC	-0.142723	0.427387	0.949888	Depleted
P17655	CAPN2	0.116605	0.427931	0.949888	Depleted
P31150	GDI1	-0.150178	0.427955	0.949888	Depleted
A8MUM7	LGALS16	0.418583	0.428259	0.949888	Depleted
P50748	KNTC1	-0.145781	0.429147	0.949888	Depleted
P14923	JUP	0.161943	0.432028	0.949888	Depleted
Q5VTT5	MYOM3	0.11699	0.432873	0.949888	Depleted
Q15102	PAFAH1B3	-0.160401	0.432999	0.949888	Depleted
P68402	PAFAH1B2	-0.18822	0.433035	0.949888	Depleted
O15204	ADAMDEC1	0.11088	0.433076	0.949888	Depleted
Q9UKX2	MYH2	0.189092	0.4332	0.949888	Depleted
P49189	ALDH9A1	-0.167621	0.433494	0.949888	Depleted
Q9NQS7	INCENP	0.0788373	0.434085	0.949888	Depleted
O00505	KPNA3	-0.897938	0.434261	0.949888	Depleted
P98172	EFNB1	0.182779	0.434904	0.949888	Depleted
P43487	RANBP1	0.16299	0.435023	0.949888	Depleted
Q93096	PTP4A1	0.174778	0.436142	0.949888	Depleted
P40197	GP5	0.110301	0.436338	0.949888	Depleted
Q14574	DSC3	0.109725	0.437232	0.949888	Depleted
Q8WW52	FAM151A	-0.0983566	0.437257	0.949888	Depleted
Q13822	ENPP2	0.0990787	0.437428	0.949888	Depleted
O15079	SNPH	-0.154387	0.437573	0.949888	Depleted
O43488	AKR7A2	-0.167802	0.438647	0.949888	Depleted
Q15833	STXBP2	0.234137	0.43922	0.949888	Depleted
Q15843	NEDD8	0.186096	0.440498	0.949888	Depleted
O76054	SEC14L2	-0.144453	0.441028	0.949888	Depleted
P59020	DSCR9	0.288999	0.441952	0.949888	Depleted
Q8TDQ7	GNPDA2	0.171047	0.443095	0.949888	Depleted
Q86Y13	DZIP3	0.144318	0.443417	0.949888	Depleted
Q9NRL3	STRN4	0.548912	0.233656	0.949967	MagNet
O60610	DIAPH1	-0.283605	0.234747	0.949967	MagNet
P35232	PHB1	-0.28413	0.23851	0.949967	MagNet
P30041	PRDX6	-0.253872	0.239751	0.949967	MagNet
Q96K76	USP47	0.39294	0.24248	0.949967	MagNet
P17858	PFKL	-0.281765	0.242814	0.949967	MagNet
P46109	CRKL	-0.318102	0.245393	0.949967	MagNet
Q8N699	MYCT1	-0.314604	0.245755	0.949967	MagNet
O75015	FCGR3B	-0.239052	0.24712	0.949967	MagNet
P23435	CBLN1	-0.187733	0.249	0.949967	MagNet
Q9Y4E8	USP15	-0.282332	0.250022	0.949967	MagNet
Q14008	CKAP5	0.303051	0.250241	0.949967	MagNet
Q8N1G4	LRRC47	-0.526058	0.250656	0.949967	MagNet
Q99436	PSMB7	-0.162661	0.250699	0.949967	MagNet
O00339	MATN2	0.406342	0.252329	0.949967	MagNet
A0A8I5KQE6	RPSA2	-0.370629	0.255554	0.949967	MagNet
P50416	CPT1A	0.335956	0.257075	0.949967	MagNet
P07360	C8G	-0.226183	0.25721	0.949967	MagNet
P11166	SLC2A1	-0.243088	0.258056	0.949967	MagNet
P14618	PKM	-0.245028	0.258139	0.949967	MagNet
O15144	ARPC2	-0.25269	0.258862	0.949967	MagNet
P11137	MAP2	-0.436914	0.259404	0.949967	MagNet
O60268	KIAA0513	-0.354091	0.263141	0.949967	MagNet
P12883	MYH7	-0.274616	0.263159	0.949967	MagNet
P47755	CAPZA2	-0.357783	0.264119	0.949967	MagNet
Q8WWA0	ITLN1	0.139855	0.264901	0.949967	MagNet
Q14254	FLOT2	-0.275261	0.265882	0.949967	MagNet
P49407	ARRB1	-0.366448	0.266528	0.949967	MagNet
A0AVT1	UBA6	-0.350401	0.267067	0.949967	MagNet
P08514	ITGA2B	-0.23646	0.267381	0.949967	MagNet
A0A0B4J1Y9	IGHV3-72	-0.112076	0.268578	0.949967	MagNet
P11279	LAMP1	-0.240793	0.269895	0.949967	MagNet
P51575	P2RX1	0.564294	0.271338	0.949967	MagNet
A0A0C4DH24	IGKV6-21	0.0910063	0.271714	0.949967	MagNet
P48735	IDH2	-0.2343	0.27212	0.949967	MagNet
P06132	UROD	-0.430753	0.272653	0.949967	MagNet
P0CH99	ZNF705D	-0.251792	0.273093	0.949967	MagNet
Q32MZ4	LRRFIP1	-0.464704	0.273626	0.949967	MagNet
P38646	HSPA9	-0.323435	0.2753	0.949967	MagNet
P04632	CAPNS1	-0.230495	0.277732	0.949967	MagNet
P47756	CAPZB	-0.228662	0.279186	0.949967	MagNet
Q01813	PFKP	-0.271517	0.279877	0.949967	MagNet
P49327	FASN	-0.224154	0.280496	0.949967	MagNet
A0A0A0MS14	IGHV1-45	0.192016	0.283391	0.949967	MagNet
P50570	DNM2	-0.308809	0.286049	0.949967	MagNet
A0A075B6K2	IGLV3-12	-0.145153	0.289178	0.949967	MagNet
O95140	MFN2	0.558178	0.289612	0.949967	MagNet
Q9Y5S2	CDC42BPB	0.441449	0.290001	0.949967	MagNet
Q9UKU9	ANGPTL2	-0.188622	0.290883	0.949967	MagNet
P27338	MAOB	-0.262531	0.292905	0.949967	MagNet
P55010	EIF5	0.301063	0.292954	0.949967	MagNet
Q15019	SEPTIN2	-0.327905	0.293152	0.949967	MagNet
Q92905	COPS5	0.276557	0.293377	0.949967	MagNet
Q05682	CALD1	-0.232411	0.293821	0.949967	MagNet
P30405	PPIF	0.26106	0.294124	0.949967	MagNet
Q9Y230	RUVBL2	0.557645	0.294258	0.949967	MagNet
Q8WZ42	TTN	0.161958	0.295726	0.949967	MagNet
P11216	PYGB	-0.242345	0.298962	0.949967	MagNet
P61019	RAB2A	-0.281302	0.299122	0.949967	MagNet
Q96JP9	CDHR1	-0.611403	0.299466	0.949967	MagNet
P13798	APEH	-0.208951	0.299832	0.949967	MagNet
P11277	SPTB	-0.224505	0.300709	0.949967	MagNet
Q99623	PHB2	-0.318579	0.303997	0.949967	MagNet
Q8TF66	LRRC15	-0.241882	0.305246	0.949967	MagNet
P61106	RAB14	-0.248828	0.30656	0.949967	MagNet
Q8IXS2	CCDC65	0.147763	0.307248	0.949967	MagNet
P24844	MYL9	-0.227155	0.308309	0.949967	MagNet
Q00610	CLTC	-0.220358	0.30898	0.949967	MagNet
Q7LGC8	CHST3	0.209419	0.309846	0.949967	MagNet
Q07507	DPT	-0.15862	0.310565	0.949967	MagNet
P00568	AK1	0.301696	0.31173	0.949967	MagNet
O75558	STX11	-0.249994	0.317891	0.949967	MagNet
P27824	CANX	-0.220322	0.318193	0.949967	MagNet
Q16531	DDB1	-0.316067	0.318726	0.949967	MagNet
P20339	RAB5A	-0.216865	0.319984	0.949967	MagNet
P01705	IGLV2-23	0.12536	0.323643	0.949967	MagNet
P53396	ACLY	-0.25391	0.323995	0.949967	MagNet
P16284	PECAM1	-0.209505	0.324523	0.949967	MagNet
P0DOX4	NA	-0.12261	0.326246	0.949967	MagNet
P62333	PSMC6	-0.367758	0.326774	0.949967	MagNet
P05023	ATP1A1	-0.197889	0.328011	0.949967	MagNet
Q7LFX5	CHST15	0.200736	0.328961	0.949967	MagNet
P98194	ATP2C1	0.471651	0.3306	0.949967	MagNet
Q9BPX5	ARPC5L	0.430078	0.331232	0.949967	MagNet
P13804	ETFA	-0.426736	0.331273	0.949967	MagNet
P17987	TCP1	-0.228165	0.331812	0.949967	MagNet
Q9P126	CLEC1B	-0.262056	0.335622	0.949967	MagNet
Q10472	GALNT1	-0.506665	0.335793	0.949967	MagNet
P27105	STOM	-0.210225	0.336989	0.949967	MagNet
Q13283	G3BP1	-0.279176	0.337483	0.949967	MagNet
P04843	RPN1	-0.250772	0.33777	0.949967	MagNet
P62826	RAN	-0.206337	0.339457	0.949967	MagNet
P00367	GLUD1	0.239319	0.34175	0.949967	MagNet
Q9H0U3	MAGT1	0.375419	0.341909	0.949967	MagNet
P07093	SERPINE2	0.158909	0.341934	0.949967	MagNet
P16452	EPB42	-0.20415	0.342994	0.949967	MagNet
P07948	LYN	-0.20562	0.343818	0.949967	MagNet
O60279	SUSD5	0.154328	0.345286	0.949967	MagNet
Q9UHQ9	CYB5R1	-0.357101	0.345292	0.949967	MagNet
Q9NZN4	EHD2	0.246618	0.346091	0.949967	MagNet
O60449	LY75	0.489243	0.346687	0.949967	MagNet
Q86TP1	PRUNE1	-0.550681	0.346887	0.949967	MagNet
P01344	IGF2	-0.197765	0.347444	0.949967	MagNet
Q6P4E1	GOLM2	-0.161565	0.34892	0.949967	MagNet
P36915	GNL1	0.280741	0.350349	0.949967	MagNet
Q9NVI7	ATAD3A	-1.35319	0.350587	0.949967	MagNet
P35612	ADD2	-0.266268	0.351547	0.949967	MagNet
P50990	CCT8	-0.199161	0.351704	0.949967	MagNet
P13224	GP1BB	-0.20426	0.352345	0.949967	MagNet
P08567	PLEK	-0.202126	0.353175	0.949967	MagNet
P00918	CA2	-0.209677	0.353381	0.949967	MagNet
P48426	PIP4K2A	-0.213578	0.354251	0.949967	MagNet
Q9NPQ8	RIC8A	-0.25244	0.356847	0.949967	MagNet
P22234	PAICS	-0.240055	0.358509	0.949967	MagNet
O76003	GLRX3	-0.374264	0.358662	0.949967	MagNet
Q9H939	PSTPIP2	0.318972	0.3587	0.949967	MagNet
Q9UNZ2	NSFL1C	-0.248035	0.358743	0.949967	MagNet
P35579	MYH9	-0.194241	0.358775	0.949967	MagNet
Q9Y6W5	WASF2	-0.237932	0.361391	0.949967	MagNet
P35555	FBN1	-0.197019	0.364386	0.949967	MagNet
Q01082	SPTBN1	-0.197074	0.367709	0.949967	MagNet
P11177	PDHB	-0.482943	0.369756	0.949967	MagNet
P55084	HADHB	-0.345245	0.369941	0.949967	MagNet
P18085	ARF4	-0.203352	0.371249	0.949967	MagNet
Q92930	RAB8B	0.300216	0.372437	0.949967	MagNet
Q8IZP7	HS6ST3	-0.340732	0.373873	0.949967	MagNet
P08670	VIM	-0.156729	0.378454	0.949967	MagNet
P46939	UTRN	-0.233918	0.378982	0.949967	MagNet
Q04917	YWHAH	-0.186886	0.379155	0.949967	MagNet
O75396	SEC22B	-0.217982	0.379717	0.949967	MagNet
P00390	GSR	-0.193931	0.379763	0.949967	MagNet
Q4LDE5	SVEP1	-0.0860732	0.379831	0.949967	MagNet
Q8NEU8	APPL2	0.465849	0.380647	0.949967	MagNet
Q15907	RAB11B	-0.191606	0.381583	0.949967	MagNet
Q96D15	RCN3	0.244133	0.382981	0.949967	MagNet
O14594	NCAN	0.151354	0.38395	0.949967	MagNet
P27701	CD82	-0.159366	0.383966	0.949967	MagNet
P07947	YES1	-0.190465	0.38466	0.949967	MagNet
Q96RL7	VPS13A	0.21444	0.38602	0.949967	MagNet
P60985	KRTDAP	-0.123635	0.386774	0.949967	MagNet
Q9ULV4	CORO1C	-0.211358	0.388928	0.949967	MagNet
P31146	CORO1A	-0.188665	0.389663	0.949967	MagNet
P01880	IGHD	-0.0676632	0.392973	0.949967	MagNet
P40227	CCT6A	-0.190943	0.397431	0.949967	MagNet
Q96JQ0	DCHS1	-0.28082	0.399957	0.949967	MagNet
P25705	ATP5F1A	-0.172823	0.400275	0.949967	MagNet
O43294	TGFB1I1	0.315011	0.401658	0.949967	MagNet
P09669	COX6C	-0.180314	0.405674	0.949967	MagNet
Q9UHD4	CIDEB	-0.382683	0.407303	0.949967	MagNet
Q9NX40	OCIAD1	0.476827	0.409286	0.949967	MagNet
Q6ZRQ5	MMS22L	0.239936	0.409808	0.949967	MagNet
Q96AG4	LRRC59	0.188633	0.410074	0.949967	MagNet
B4DU55	ZNF879	0.381105	0.413227	0.949967	MagNet
P15170	GSPT1	-0.249372	0.414484	0.949967	MagNet
Q10567	AP1B1	-0.315572	0.416377	0.949967	MagNet
Q8N2S1	LTBP4	0.149275	0.417977	0.949967	MagNet
P07203	GPX1	-0.178717	0.41861	0.949967	MagNet
Q6UWD8	C16orf54	0.170327	0.418699	0.949967	MagNet
P11413	G6PD	-0.177975	0.421218	0.949967	MagNet
Q9NQ75	CASS4	-0.211156	0.422276	0.949967	MagNet
Q14432	PDE3A	-0.127222	0.422501	0.949967	MagNet
P60709	ACTB	-0.17136	0.422851	0.949967	MagNet
Q9P0L0	VAPA	0.280872	0.426703	0.949967	MagNet
Q14012	CAMK1	0.152189	0.427559	0.949967	MagNet
Q16820	MEP1B	-0.135895	0.427942	0.949967	MagNet
P49641	MAN2A2	-0.15912	0.42878	0.949967	MagNet
Q13813	SPTAN1	0.251017	0.429121	0.949967	MagNet
P78371	CCT2	-0.175941	0.429729	0.949967	MagNet
P50225	SULT1A1	-0.302745	0.430683	0.949967	MagNet
P04211	IGLV7-43	-0.100399	0.432589	0.949967	MagNet
P08648	ITGA5	-0.181811	0.433734	0.949967	MagNet
P0DOX2	NA	-0.118308	0.434695	0.949967	MagNet
Q4KMQ2	ANO6	-0.208797	0.43637	0.949967	MagNet
O00264	PGRMC1	-0.173258	0.43666	0.949967	MagNet
Q7L576	CYFIP1	-0.179602	0.437933	0.949967	MagNet
Q93084	ATP2A3	-0.171586	0.438257	0.949967	MagNet
Q9NV96	TMEM30A	0.696154	0.439495	0.949967	MagNet
Q9UKZ9	PCOLCE2	-0.143293	0.440082	0.949967	MagNet
Q99909	SSX3	0.238155	0.440239	0.949967	MagNet
Q86VP6	CAND1	-0.164218	0.440703	0.949967	MagNet
P14770	GP9	-0.189422	0.441249	0.949967	MagNet
P05141	SLC25A5	0.376734	0.441634	0.949967	MagNet
P53621	COPA	0.213285	0.444573	0.949967	MagNet
P05771	PRKCB	-0.265639	0.444877	0.949967	MagNet
O75581	LRP6	-0.213233	0.448401	0.949967	MagNet
Q7Z434	MAVS	0.394089	0.448925	0.949967	MagNet
P11215	ITGAM	-0.152748	0.449691	0.949967	MagNet
P01111	NRAS	-0.184888	0.45063	0.949967	MagNet
P08493	MGP	0.115471	0.450768	0.949967	MagNet
Q15084	PDIA6	-0.162906	0.452321	0.949967	MagNet
Q15293	RCN1	0.112694	0.452543	0.949967	MagNet
P07478	PRSS2	-0.0950338	0.453606	0.949967	MagNet
P07951	TPM2	-0.18276	0.454762	0.949967	MagNet
P55160	NCKAP1L	-0.0924188	0.455729	0.949967	MagNet
Q15691	MAPRE1	-0.163954	0.457326	0.949967	MagNet
Q9NX63	CHCHD3	0.89522	0.457923	0.949967	MagNet
P48444	ARCN1	-0.26218	0.45817	0.949967	MagNet
O60664	PLIN3	0.606896	0.458301	0.949967	MagNet
Q00013	MPP1	-0.175049	0.458986	0.949967	MagNet
P29122	PCSK6	-0.152022	0.45911	0.949967	MagNet
Q14697	GANAB	-0.134043	0.461078	0.949967	MagNet
Q08830	FGL1	-0.117187	0.461085	0.949967	MagNet
Q9BWM7	SFXN3	-0.359776	0.46165	0.949967	MagNet
P17301	ITGA2	-0.147001	0.462628	0.949967	MagNet
A0A0B4J1V1	IGHV3-21	-0.379891	0.462852	0.949967	MagNet
P45880	VDAC2	-0.165296	0.467573	0.949967	MagNet
P53814	SMTN	0.327223	0.46802	0.949967	MagNet
Q9H479	FN3K	-0.248506	0.468265	0.949967	MagNet
Q8WWK9	CKAP2	-0.136599	0.470962	0.949967	MagNet
Q14393	GAS6	0.0968614	0.470987	0.949967	MagNet
Q9H0U4	RAB1B	-0.158602	0.471405	0.949967	MagNet
Q9UPV0	CEP164	-0.134095	0.473033	0.949967	MagNet
P49643	PRIM2	-0.15131	0.473389	0.949967	MagNet
Q9UHI8	ADAMTS1	-0.15596	0.475021	0.949967	MagNet
P51659	HSD17B4	-0.168763	0.475486	0.949967	MagNet
O00743	PPP6C	0.19308	0.477319	0.949967	MagNet
P62495	ETF1	-0.163436	0.481537	0.949967	MagNet
P13598	ICAM2	-0.139352	0.486182	0.949967	MagNet
Q15365	PCBP1	-0.215484	0.486766	0.949967	MagNet
P00491	PNP	-0.152319	0.487402	0.949967	MagNet
P40939	HADHA	-0.196206	0.488155	0.949967	MagNet
Q9Y6E0	STK24	0.211587	0.490761	0.949967	MagNet
O14983	ATP2A1	-0.154869	0.493875	0.949967	MagNet
P11169	SLC2A3	-0.150846	0.494353	0.949967	MagNet
Q96I82	KAZALD1	-0.190344	0.495893	0.949967	MagNet
Q9Y5C1	ANGPTL3	0.11912	0.496015	0.949967	MagNet
Q8WWI5	SLC44A1	-0.128835	0.502213	0.949967	MagNet
P23368	ME2	-0.174172	0.503241	0.949967	MagNet
Q06481	APLP2	-0.341973	0.504155	0.949967	MagNet
Q96T51	RUFY1	0.184423	0.506062	0.949967	MagNet
Q6DD88	ATL3	-0.177663	0.506619	0.949967	MagNet
Q9ULC5	ACSL5	0.293103	0.507695	0.949967	MagNet
O60229	KALRN	-0.175056	0.509563	0.949967	MagNet
Q9Y6F6	IRAG1	0.217097	0.509906	0.949967	MagNet
Q96A26	FAM162A	-0.236163	0.512028	0.949967	MagNet
Q92187	ST8SIA4	0.131849	0.512839	0.949967	MagNet
Q04837	SSBP1	-0.18563	0.515211	0.949967	MagNet
Q8N3F0	MTURN	0.342916	0.515285	0.949967	MagNet
P02775	PPBP	-0.134061	0.516007	0.949967	MagNet
Q00325	SLC25A3	-0.161293	0.516075	0.949967	MagNet
P36957	DLST	-0.215091	0.517628	0.949967	MagNet
P12035	KRT3	-0.123124	0.517798	0.949967	MagNet
Q13555	CAMK2G	0.35709	0.517831	0.949967	MagNet
P56134	ATP5MF	-0.243737	0.518201	0.949967	MagNet
Q0VAA2	LRRC74A	0.0485209	0.80722	0.94998	Neat
A0A0C4DH30	IGHV3-16	-0.0668005	0.808367	0.950094	Neat
P50120	RBP2	0.294562	0.031456	0.950549	Olink
Q12905	ILF2	0.358967	0.0315914	0.950549	Olink
P61970	NUTF2	-0.160825	0.450216	0.951015	Depleted
P49588	AARS1	0.232585	0.450241	0.951015	Depleted
P48637	GSS	-0.12946	0.450973	0.951015	Depleted
P14550	AKR1A1	0.139882	0.450996	0.951015	Depleted
P22061	PCMT1	-0.149426	0.451519	0.951015	Depleted
O15315	RAD51B	-0.155087	0.451656	0.951015	Depleted
Q16825	PTPN21	-0.242619	0.452055	0.951015	Depleted
Q9UQ52	CNTN6	-0.149672	0.452388	0.951015	Depleted
Q8IZQ1	WDFY3	0.189611	0.521183	0.951123	MagNet
Q7L591	DOK3	0.234966	0.521533	0.951123	MagNet
O00116	AGPS	-0.435257	0.524872	0.951123	MagNet
Q01518	CAP1	-0.139719	0.527354	0.951123	MagNet
Q02218	OGDH	0.292529	0.527793	0.951123	MagNet
Q96EF6	FBXO17	-0.048896	0.528197	0.951123	MagNet
P62993	GRB2	0.238515	0.528663	0.951123	MagNet
P08922	ROS1	0.163136	0.454091	0.951436	Depleted
Q13404	UBE2V1	-0.160957	0.455632	0.951436	Depleted
C9JLR9	ZFTA	0.195909	0.456045	0.951436	Depleted
P60842	EIF4A1	-0.153698	0.456232	0.951436	Depleted
O75976	CPD	0.116091	0.456403	0.951436	Depleted
O00159	MYO1C	0.151352	0.532346	0.951901	MagNet
Q9BVC6	TMEM109	-0.160083	0.534521	0.951901	MagNet
Q9UF33	EPHA6	0.358194	0.538277	0.951901	MagNet
Q9Y394	DHRS7	-0.1664	0.538789	0.951901	MagNet
P55786	NPEPPS	-0.130491	0.541248	0.951901	MagNet
Q15555	MAPRE2	-0.137744	0.543886	0.951901	MagNet
A0A075B6K4	IGLV3-10	-0.070054	0.545109	0.951901	MagNet
P02753	RBP4	-0.102051	0.547578	0.951901	MagNet
P61225	RAP2B	-0.129883	0.54833	0.951901	MagNet
O15439	ABCC4	-0.225687	0.549478	0.951901	MagNet
P78509	RELN	-0.0897062	0.551675	0.951901	MagNet
Q9Y3F4	STRAP	-0.264648	0.552639	0.951901	MagNet
Q6PJW8	CNST	0.206705	0.554182	0.951901	MagNet
P23219	PTGS1	0.156991	0.554217	0.951901	MagNet
P41250	GARS1	-0.164633	0.554295	0.951901	MagNet
P61981	YWHAG	-0.129498	0.554852	0.951901	MagNet
Q86Y82	STX12	0.270052	0.55694	0.951901	MagNet
Q9UNS2	COPS3	-0.152313	0.557432	0.951901	MagNet
Q6P1M0	SLC27A4	-0.245896	0.558117	0.951901	MagNet
O00501	CLDN5	-0.338653	0.55905	0.951901	MagNet
O00186	STXBP3	0.1497	0.562616	0.951901	MagNet
P61421	ATP6V0D1	-0.202136	0.563187	0.951901	MagNet
P60953	CDC42	-0.13305	0.56393	0.951901	MagNet
P35606	COPB2	-0.193212	0.565045	0.951901	MagNet
Q02094	RHAG	-0.127389	0.570396	0.953058	MagNet
P55291	CDH15	0.0548774	0.571561	0.953058	MagNet
Q96MK2	RIPOR3	0.180717	0.573787	0.953058	MagNet
Q658P3	STEAP3	0.195323	0.575877	0.953058	MagNet
O14656	TOR1A	-0.106365	0.576154	0.953058	MagNet
P0DMM9	SULT1A3	0.362795	0.577287	0.953058	MagNet
Q9Y2Q0	ATP8A1	-0.151477	0.582125	0.953058	MagNet
P55036	PSMD4	-0.179038	0.590757	0.953058	MagNet
Q9NX76	CMTM6	-0.190121	0.591787	0.953058	MagNet
Q9NYQ6	CELSR1	-0.113992	0.593716	0.953058	MagNet
P02776	PF4	-0.108267	0.594504	0.953058	MagNet
Q8IZP0	ABI1	0.129221	0.59499	0.953058	MagNet
Q14974	KPNB1	-0.119115	0.595539	0.953058	MagNet
O75964	ATP5MG	-0.14075	0.595798	0.953058	MagNet
P10619	CTSA	0.17732	0.597376	0.953058	MagNet
Q9GZP7	VN1R1	0.129826	0.598865	0.953058	MagNet
P01597	IGKV1-39	-0.0695983	0.599537	0.953058	MagNet
P28072	PSMB6	-0.0911246	0.60132	0.953058	MagNet
Q86UF1	TSPAN33	-0.288543	0.602453	0.953058	MagNet
P11940	PABPC1	0.229431	0.606679	0.953058	MagNet
Q9Y210	TRPC6	-0.167463	0.606865	0.953058	MagNet
P50148	GNAQ	-0.11945	0.609628	0.953058	MagNet
Q13683	ITGA7	0.107981	0.609667	0.953058	MagNet
Q9H497	TOR3A	0.157602	0.611822	0.953058	MagNet
Q9UHD8	SEPTIN9	0.201803	0.612373	0.953058	MagNet
Q08722	CD47	-0.132719	0.61366	0.953058	MagNet
Q9H444	CHMP4B	-0.197477	0.615446	0.953058	MagNet
P01861	IGHG4	0.0278889	0.616236	0.953058	MagNet
P30153	PPP2R1A	0.146749	0.457904	0.953567	Depleted
Q14749	GNMT	-0.213529	0.459535	0.953977	Depleted
P59910	DNAJB13	-0.142535	0.460522	0.955033	Depleted
Q16787	LAMA3	-0.136529	0.461842	0.955978	Depleted
Q8TEU8	WFIKKN2	0.227795	0.0319619	0.956385	Olink
P23276	KEL	-0.189064	0.0324294	0.956536	Olink
Q9GZV1	ANKRD2	-0.287779	0.03272	0.956536	Olink
Q9NTJ3	SMC4	-0.197753	0.0327586	0.956536	Olink
Q9UMR7	CLEC4A	0.279003	0.0328192	0.956536	Olink
P17302	GJA1	-0.279061	0.0330973	0.956536	Olink
Q9UM47	NOTCH3	0.289425	0.0331674	0.956536	Olink
Q14126	DSG2	0.339858	0.0332032	0.956536	Olink
P40306	PSMB10	-0.0985599	0.623231	0.958385	MagNet
P49748	ACADVL	0.147097	0.623776	0.958385	MagNet
P27348	YWHAQ	-0.144235	0.463613	0.958453	Depleted
P62195	PSMC5	-0.105958	0.625215	0.959422	MagNet
P01275	GCG	0.151114	0.628311	0.959422	MagNet
Q9H2W6	MRPL46	-0.43925	0.0334835	0.959505	Olink
Q9UIL4	KIF25	-0.0242996	0.832435	0.960063	Neat
P01825	IGHV4-59	-0.0176892	0.843669	0.960198	Neat
Q96IX5	ATP5MK	0.293475	0.631889	0.960519	MagNet
P45974	USP5	0.135182	0.632964	0.960519	MagNet
P55884	EIF3B	-0.263466	0.639746	0.960519	MagNet
P01876	IGHA1	-0.0709607	0.64191	0.960519	MagNet
Q9Y5P6	GMPPB	-0.176849	0.642452	0.960519	MagNet
Q99973	TEP1	-0.181391	0.643517	0.960519	MagNet
Q9P270	SLAIN2	0.168224	0.647507	0.960519	MagNet
Q9UPW5	AGTPBP1	0.0769635	0.650149	0.960519	MagNet
P35442	THBS2	0.061589	0.6504	0.960519	MagNet
A0A0A0MRZ8	IGKV3D-11	-0.0595133	0.65043	0.960519	MagNet
A0A075B6Q5	IGHV3-64	-0.0587104	0.650517	0.960519	MagNet
Q14156	EFR3A	0.341916	0.651389	0.960519	MagNet
Q14242	SELPLG	-0.0867196	0.651759	0.960519	MagNet
P21980	TGM2	-0.12303	0.6525	0.960519	MagNet
P61163	ACTR1A	-0.121861	0.656138	0.960519	MagNet
P38571	LIPA	-0.0823914	0.656381	0.960519	MagNet
P78417	GSTO1	-0.0972088	0.656952	0.960519	MagNet
Q13107	USP4	0.12169	0.657181	0.960519	MagNet
Q13586	STIM1	0.103889	0.657652	0.960519	MagNet
Q8TC12	RDH11	-0.109262	0.657786	0.960519	MagNet
P48059	LIMS1	-0.0972162	0.65807	0.960519	MagNet
Q13642	FHL1	0.10938	0.6604	0.960519	MagNet
B2RUZ4	SMIM1	-0.109353	0.661152	0.960519	MagNet
O94886	TMEM63A	-0.174417	0.664242	0.960519	MagNet
P01772	IGHV3-33	-0.046955	0.665088	0.960519	MagNet
Q96IJ6	GMPPA	-0.158751	0.66535	0.960519	MagNet
O43529	CHST10	-0.12297	0.667283	0.960519	MagNet
P12236	SLC25A6	-0.0973351	0.66751	0.960519	MagNet
P13164	IFITM1	0.080249	0.668127	0.960519	MagNet
Q04941	PLP2	-0.128097	0.669494	0.960519	MagNet
P10412	H1-4	0.0934654	0.669563	0.960519	MagNet
P17252	PRKCA	0.259782	0.671252	0.960519	MagNet
Q15286	RAB35	0.196208	0.67341	0.960519	MagNet
P11234	RALB	-0.0903472	0.675505	0.960519	MagNet
Q12981	BNIP1	-0.0999199	0.678708	0.960519	MagNet
Q96RT1	ERBIN	0.153812	0.679712	0.960519	MagNet
Q00577	PURA	0.117714	0.680958	0.960519	MagNet
O14672	ADAM10	0.0709829	0.682272	0.960519	MagNet
Q9UPN3	MACF1	-0.123436	0.682756	0.960519	MagNet
P15941	MUC1	0.128231	0.683021	0.960519	MagNet
O00461	GOLIM4	0.0707617	0.683232	0.960519	MagNet
P50336	PPOX	0.112876	0.684791	0.960519	MagNet
Q8TD55	PLEKHO2	0.122406	0.685307	0.960519	MagNet
Q709C8	VPS13C	0.184783	0.686124	0.960519	MagNet
Q8WUT4	LRRN4	-0.0530474	0.686181	0.960519	MagNet
Q6VY07	PACS1	-0.182952	0.692007	0.960519	MagNet
P49411	TUFM	-0.1196	0.693717	0.960519	MagNet
Q13423	NNT	-0.0969625	0.693982	0.960519	MagNet
Q15018	ABRAXAS2	0.175785	0.695648	0.960519	MagNet
Q07866	KLC1	0.182988	0.697076	0.960519	MagNet
Q8WUJ3	CEMIP	-0.055099	0.702528	0.960519	MagNet
Q92614	MYO18A	-0.118315	0.702585	0.960519	MagNet
Q9NVK5	FGFR1OP2	0.120574	0.703393	0.960519	MagNet
Q9UKG1	APPL1	0.27131	0.705927	0.960519	MagNet
Q7L5N1	COPS6	0.141923	0.706297	0.960519	MagNet
P0DPH7	TUBA3C	-0.16214	0.706308	0.960519	MagNet
P53618	COPB1	0.142017	0.706309	0.960519	MagNet
P29144	TPP2	0.156569	0.467259	0.960988	Depleted
Q86WI1	PKHD1L1	0.0521282	0.470057	0.960988	Depleted
P06737	PYGL	-0.121293	0.471559	0.960988	Depleted
Q8IWK6	ADGRA3	0.10859	0.472609	0.960988	Depleted
Q9UKC9	FBXL2	0.263342	0.472929	0.960988	Depleted
Q96DU9	PABPC5	-0.120032	0.473313	0.960988	Depleted
P28065	PSMB9	-0.117819	0.473965	0.960988	Depleted
Q8N3T6	TMEM132C	0.120175	0.474167	0.960988	Depleted
P42229	STAT5A	0.195508	0.475442	0.960988	Depleted
P19013	KRT4	0.284144	0.476655	0.960988	Depleted
Q93091	RNASE6	-0.213492	0.476753	0.960988	Depleted
P06280	GLA	-0.153899	0.479462	0.960988	Depleted
Q6WRI0	IGSF10	-0.261281	0.479886	0.960988	Depleted
Q16555	DPYSL2	-0.148289	0.481006	0.960988	Depleted
Q86UN2	RTN4RL1	-0.17612	0.483834	0.960988	Depleted
P24593	IGFBP5	-0.133592	0.483909	0.960988	Depleted
Q9Y265	RUVBL1	-0.343008	0.708841	0.961124	MagNet
Q8N149	LILRA2	-0.277746	0.033719	0.961168	Olink
P30990	NTS	0.114191	0.486816	0.965027	Depleted
P21549	AGXT	-0.136505	0.492978	0.966215	Depleted
Q659A1	ICE2	0.166551	0.496314	0.966215	Depleted
P25815	S100P	0.111209	0.496588	0.966215	Depleted
Q8IUL8	CILP2	-0.0789537	0.498081	0.966215	Depleted
P05120	SERPINB2	-0.179413	0.499417	0.966215	Depleted
Q8IYS0	GRAMD1C	-0.133035	0.500355	0.966215	Depleted
Q8WV24	PHLDA1	-0.193423	0.500816	0.966215	Depleted
P62714	PPP2CB	-0.177291	0.501037	0.966215	Depleted
P22303	ACHE	-0.0900275	0.501535	0.966215	Depleted
P52849	NDST2	0.166714	0.501587	0.966215	Depleted
A6NKT7	RGPD3	0.300461	0.501753	0.966215	Depleted
P35318	ADM	0.166371	0.50186	0.966215	Depleted
P00813	ADA	0.164905	0.502604	0.966215	Depleted
Q8IYJ1	CPNE9	0.117868	0.502801	0.966215	Depleted
P50895	BCAM	-0.110101	0.503724	0.966215	Depleted
O00233	PSMD9	0.164985	0.504182	0.966215	Depleted
Q01538	MYT1	0.14401	0.50836	0.966215	Depleted
Q86SF2	GALNT7	-0.0976804	0.510177	0.966215	Depleted
P09467	FBP1	-0.107614	0.511133	0.966215	Depleted
O15417	TNRC18	0.137726	0.512827	0.966215	Depleted
Q9BXJ4	C1QTNF3	0.0883186	0.513461	0.966215	Depleted
Q14019	COTL1	-0.130338	0.513851	0.966215	Depleted
Q12906	ILF3	0.217628	0.517509	0.966215	Depleted
Q9P121	NTM	-0.110831	0.517642	0.966215	Depleted
P54922	ADPRH	0.336985	0.518121	0.966215	Depleted
Q8TD84	DSCAML1	0.19008	0.519007	0.966215	Depleted
Q8IZ83	ALDH16A1	-0.265201	0.519635	0.966215	Depleted
Q15382	RHEB	0.57279	0.520005	0.966215	Depleted
P18433	PTPRA	-0.228105	0.520643	0.966215	Depleted
P11117	ACP2	0.274915	0.521068	0.966215	Depleted
Q13153	PAK1	0.145558	0.52118	0.966215	Depleted
P20036	HLA-DPA1	0.287987	0.524473	0.966215	Depleted
Q9NYU2	UGGT1	0.0930025	0.525813	0.966215	Depleted
Q9NRN5	OLFML3	0.121139	0.527109	0.966215	Depleted
Q9UPV7	PHF24	-0.130392	0.52716	0.966215	Depleted
O43633	CHMP2A	0.344047	0.528183	0.966215	Depleted
Q93088	BHMT	-0.0914781	0.528355	0.966215	Depleted
Q96IU4	ABHD14B	-0.139151	0.529284	0.966215	Depleted
Q14563	SEMA3A	-0.122034	0.529844	0.966215	Depleted
P19086	GNAZ	-0.0900517	0.714398	0.966819	MagNet
P55001	MFAP2	-0.0772504	0.719583	0.967765	MagNet
Q8WXF7	ATL1	0.177601	0.720629	0.967765	MagNet
Q5BLP8	NICOL1	-0.135061	0.721528	0.967765	MagNet
A0A075B6I1	IGLV4-60	-0.0383149	0.864433	0.967854	Neat
P01704	IGLV2-14	0.0116348	0.876864	0.967854	Neat
Q8N5W9	RFLNB	0.0197925	0.880792	0.967854	Neat
Q9UBS9	SUCO	0.1372	0.722691	0.967902	MagNet
P15153	RAC2	-0.083262	0.725076	0.967902	MagNet
Q9UNH7	SNX6	-0.166116	0.726859	0.967902	MagNet
Q5H9R7	PPP6R3	0.0965494	0.733772	0.967902	MagNet
Q8TCT9	HM13	-0.138704	0.737296	0.967902	MagNet
Q9BTV4	TMEM43	-0.155948	0.73813	0.967902	MagNet
Q9Y3Q8	TSC22D4	-0.139841	0.741275	0.967902	MagNet
Q8NEV4	MYO3A	0.0993701	0.741383	0.967902	MagNet
Q13415	ORC1	-0.191821	0.742842	0.967902	MagNet
P55060	CSE1L	-0.118324	0.744667	0.967902	MagNet
P42704	LRPPRC	-0.156452	0.74567	0.967902	MagNet
Q9BQE3	TUBA1C	-0.102952	0.746621	0.967902	MagNet
P22694	PRKACB	0.0963074	0.748619	0.967902	MagNet
O14744	PRMT5	0.200957	0.748631	0.967902	MagNet
Q96S38	RPS6KC1	0.0488114	0.748914	0.967902	MagNet
Q9Y608	LRRFIP2	-0.112363	0.749478	0.967902	MagNet
Q92882	OSTF1	-0.134465	0.754055	0.968083	MagNet
Q9H2M9	RAB3GAP2	0.187257	0.754185	0.968083	MagNet
Q9Y3A6	TMED5	-0.236468	0.755351	0.968083	MagNet
P04844	RPN2	0.109235	0.757167	0.968083	MagNet
Q5JRA6	MIA3	0.0557752	0.75755	0.968083	MagNet
P13073	COX4I1	-0.0798357	0.758686	0.968083	MagNet
Q9UL46	PSME2	-0.114366	0.532465	0.96834	Depleted
P61088	UBE2N	-0.123839	0.533416	0.968523	Depleted
Q15397	PUM3	-0.0777018	0.535417	0.968523	Depleted
Q15303	ERBB4	-0.129878	0.539194	0.968523	Depleted
P52848	NDST1	0.115135	0.539732	0.968523	Depleted
Q9UK55	SERPINA10	-0.0690884	0.540107	0.968523	Depleted
P0DOX3	NA	-0.0743468	0.542457	0.968523	Depleted
P51665	PSMD7	0.254392	0.544678	0.968523	Depleted
P78504	JAG1	0.116304	0.544756	0.968523	Depleted
P20073	ANXA7	-0.164113	0.54497	0.968523	Depleted
P28482	MAPK1	-0.184953	0.545602	0.968523	Depleted
Q13797	ITGA9	0.124738	0.545603	0.968523	Depleted
P19961	AMY2B	0.0599467	0.546797	0.968792	Depleted
P42224	STAT1	0.560314	0.547798	0.969704	Depleted
P25098	GRK2	0.19097	0.550239	0.971295	Depleted
Q6UY14	ADAMTSL4	0.330952	0.0916335	0.971595	PCA
P98095	FBLN2	-0.103825	0.553732	0.971722	Depleted
Q9BWD1	ACAT2	-0.124182	0.555303	0.971722	Depleted
O95865	DDAH2	0.174834	0.555321	0.971722	Depleted
Q8IZS8	CACNA2D3	-0.152341	0.555757	0.971722	Depleted
[truncated: 5,145 more rows]

## Sheet: Neat
ProteinID	GeneID	Estimate	P_value
P02786	TFRC	0.521655	5.44555e-07
Q9NPY3	CD93	0.730434	3.50506e-05
Q12805	EFEMP1	0.510675	3.80055e-05
P01023	A2M	0.389874	5.63457e-05
P01009	SERPINA1	0.535677	7.80348e-05
P17600	SYN1	0.961682	0.000113184
P04278	SHBG	0.313465	0.000351997
P02787	TF	0.614515	0.000438556
P12955	PEPD	0.48109	0.000772327
O14786	NRP1	0.39475	0.000882173
Q92954	PRG4	-0.332951	0.000936943
A1L4H1	SSC5D	-0.474944	0.00144623
P02792	FTL	-0.722822	0.00173122
P01834	IGKC	0.392846	0.00218184
P20742	PZP	-0.137967	0.00245499
P33151	CDH5	0.49169	0.00284015
P02743	APCS	-0.381577	0.00286788
P13645	KRT10	-0.554895	0.00298505
P13647	KRT5	-0.580781	0.00299997
P06396	GSN	0.52509	0.00314228
P07359	GP1BA	0.440338	0.00355405
P04264	KRT1	-0.530485	0.0037346
A0A0B4J1Y8	IGLV9-49	-0.111916	0.00402606
Q9H4G4	GLIPR2	0.529646	0.00427057
Q13103	SPP2	0.305326	0.00443397
Q8NBP7	PCSK9	0.493849	0.00458614
A0A075B6P5;P01615	IGKV2-28;IGKV2D-28	-0.17379	0.0050001
P05156	CFI	-0.371769	0.00567848
P20774	OGN	0.467739	0.00641273
Q96PD5	PGLYRP2	0.420036	0.0075974
P23471	PTPRZ1	-0.792123	0.0076824
P27918	CFP	-0.373544	0.00841435
P19652	ORM2	-0.386567	0.00855853
P05090	APOD	0.411156	0.00914467
P02538	KRT6A	-0.531101	0.00931049
Q9Y6Z7	COLEC10	0.34425	0.00938963
P02763	ORM1	-0.427549	0.00954529
P58335	ANTXR2	0.359447	0.00969051
Q9NYW8	RBAK	0.518005	0.0100534
Q8WZ75	ROBO4	0.387397	0.0108093
P35527	KRT9	-0.503405	0.011082
P35443	THBS4	0.400537	0.0123701
Q9P2X0	DPM3	0.44741	0.0128085
P0C0L5	C4B	-0.216326	0.0129905
Q16288	NTRK3	-0.649026	0.0131404
P01768;P0DP03	IGHV3-30;IGHV3-30-5	-0.251221	0.013482
Q3LXA3	TKFC	-0.907696	0.0135716
Q13093	PLA2G7	-0.25929	0.0137763
P02533	KRT14	-0.485919	0.0143803
Q02985	CFHR3	-0.360585	0.0150015
P43121	MCAM	0.358659	0.0156498
P80723	BASP1	0.412229	0.015884
P00751	CFB	-0.287776	0.0160692
P02766	TTR	-0.409405	0.0163782
P02741	CRP	-0.438476	0.0170364
P02768	ALB	0.415524	0.0177483
Q9P032	NDUFAF4	-0.503897	0.0182411
Q8WUM4	PDCD6IP	-0.560943	0.0184323
P35908	KRT2	-0.441617	0.0196763
P06702	S100A9	-0.510132	0.0199318
O14974	PPP1R12A	0.472847	0.0200837
P05164	MPO	-0.446093	0.0202584
Q8TBZ2	MYCBPAP	0.2614	0.0202627
Q86VB7	CD163	-0.264	0.0206742
P01040	CSTA	-0.451265	0.0214491
Q86U17	SERPINA11	0.342565	0.0216468
P23142	FBLN1	0.237346	0.0226372
P02655	APOC2	-0.207881	0.0236126
P35542	SAA4	-0.233655	0.0241176
P81172	HAMP	-0.631787	0.0249138
P24821	TNC	0.276924	0.02564
Q93070	ART4	-0.480914	0.0265104
Q9HBW9	ADGRL4	0.436173	0.0267549
P01714	IGLV3-19	-0.175794	0.0280615
Q8IV35	CFAP337	0.403595	0.0282473
P19823	ITIH2	0.252436	0.029084
O95389	CCN6	-0.444854	0.0291918
O95497	VNN1	-0.145838	0.0292256
Q15485	FCN2	-0.206539	0.0295747
P08217	CELA2A	0.300783	0.0312692
P23470	PTPRG	0.365181	0.0325067
P01814	IGHV2-70	-0.286332	0.0326369
P02647	APOA1	0.370052	0.0328883
P20023	CR2	-0.22412	0.0331227
P33908	MAN1A1	-0.371347	0.0361241
P10643	C7	0.171405	0.0365854
P50281	MMP14	-0.416866	0.0368749
P01764	IGHV3-23	-0.209077	0.0382143
P02747	C1QC	0.354336	0.0385178
Q03591	CFHR1	-0.152385	0.0394682
B2RTY4	MYO9A	-0.45534	0.0401875
Q99983	OMD	0.949884	0.0407017
P16109	SELP	0.419586	0.0419291
P02745	C1QA	0.375428	0.0422357
P61769	B2M	-0.28204	0.0437592
P00734	F2	0.285673	0.0439739
O75636	FCN3	-0.136733	0.0451636
P01767	IGHV3-53	0.273469	0.0451763
O75594	PGLYRP1	-0.332947	0.0462176
Q15113	PCOLCE	0.31034	0.0463973
P25774	CTSS	-0.373051	0.0470765
P24592	IGFBP6	-0.404354	0.0475141
Q86YZ3	HRNR	-0.546911	0.0476687
Q15582	TGFBI	0.263243	0.0477325
P40925	MDH1	-0.473532	0.047802
Q92878	RAD50	0.32614	0.0489165
P0DJI8	SAA1	-0.306427	0.0498305
A2CJ06	DYTN	-0.376776	0.0501422
Q03468	ERCC6	-0.202402	0.0510147
A0A0A0MT89	IGKJ1	-0.10565	0.0514684
P00747	PLG	0.25943	0.0533001
P0DJI9	SAA2	-0.358126	0.0542278
Q96CX2	KCTD12	-0.527105	0.0550489
A0A075B6S5	IGKV1-27	-0.311134	0.0551884
P16930	FAH	-0.260342	0.0561893
Q9NZ08	ERAP1	0.346446	0.0562302
A0A0B4J1X5	IGHV3-74	-0.208604	0.0563352
P03951	F11	0.186826	0.0574412
Q9Y485	DMXL1	0.472697	0.0589792
Q92820	GGH	-0.180605	0.0592374
P08319	ADH4	-0.402665	0.0595058
P49802	RGS7	0.416742	0.0600939
P02788	LTF	0.232706	0.0611654
A0A0B4J1V0	IGHV3-15	0.22042	0.0616281
O43157	PLXNB1	0.311695	0.0619975
Q92859	NEO1	-0.334374	0.0628328
Q9NZP8	C1RL	-0.179874	0.0629453
Q9HBI1	PARVB	-0.556015	0.0642883
Q9NPR2	SEMA4B	-0.284723	0.0644803
Q6UX71	PLXDC2	0.324837	0.0671858
P00739	HPR	-0.121994	0.0673391
P01859	IGHG2	0.171521	0.0677514
P04406	GAPDH	-0.34953	0.0687241
Q8IWV2	CNTN4	0.361371	0.0703772
Q08380	LGALS3BP	-0.126868	0.071157
P12111	COL6A3	0.271975	0.0730898
Q6EMK4	VASN	-0.247709	0.0733831
A0M8Q6	IGLC7	0.2506	0.0734425
P01715	IGLV3-1	-0.155816	0.0735551
Q9NQ79	CRTAC1	0.242398	0.0739898
P11597	CETP	-0.268423	0.0776594
Q7Z4R8	C6orf120	0.390941	0.0804842
P03950	ANG	-0.257291	0.0820207
Q04756	HGFAC	0.16109	0.0827311
A0A1B0GTC6	C3orf85	0.327349	0.0830295
Q8IYS5	OSCAR	-0.462706	0.083697
Q9UBQ6	EXTL2	0.33363	0.0846677
P01743	IGHV1-46	-0.140194	0.0854679
A0A087WW87;P01614	IGKV2-40;IGKV2D-40	-0.117937	0.0856071
P03952	KLKB1	0.21667	0.0857959
P01706	IGLV2-11	-0.176515	0.0873506
P43251	BTD	-0.175195	0.0892894
P20851	C4BPB	-0.274057	0.0893371
P02649	APOE	-0.17465	0.0905652
Q9UNW1	MINPP1	0.255246	0.0906014
P01008	SERPINC1	0.206622	0.092772
P07339	CTSD	-0.17567	0.0927859
Q9BYJ0	FGFBP2	0.259376	0.0930844
P01871	IGHM	0.140732	0.0934544
P01033	TIMP1	-0.242157	0.0974198
P07942	LAMB1	0.311385	0.0979896
Q5D862	FLG2	-0.449734	0.0991068
Q96NZ9	PRAP1	0.256982	0.100083
Q04721	NOTCH2	-0.34341	0.100442
P49908	SELENOP	-0.206855	0.101862
Q14126	DSG2	0.276218	0.102908
P26038	MSN	-0.327304	0.104136
Q96DM3	RMC1	-0.426212	0.104572
P06733	ENO1	-0.345135	0.105658
P05546	SERPIND1	-0.147295	0.10588
P59665;P59666	DEFA1;DEFA3	-0.216301	0.106563
P05154	SERPINA5	0.195386	0.108969
Q8WTU2	SSC4D	-0.413957	0.109259
P07477	PRSS1	0.353213	0.110535
P18065	IGFBP2	0.177429	0.110922
Q7Z6K1	THAP5	0.216033	0.110935
Q9H8L6	MMRN2	0.222546	0.113154
P59998	ARPC4	0.645175	0.11563
Q99969	RARRES2	-0.262858	0.116101
P10721	KIT	-0.220075	0.117388
A0A0C4DH33	IGHV1-24	-0.100501	0.11875
Q8N2W9	PIAS4	-0.347599	0.119553
Q9Y6R7	FCGBP	-0.0858083	0.119785
Q16627	CCL14	-0.270473	0.120632
Q9P281	BAHCC1	0.394958	0.120959
A0A075B6K5	IGLV3-9	-0.167621	0.121189
P35858	IGFALS	0.162063	0.122954
P16157	ANK1	-0.372401	0.124435
P05452	CLEC3B	0.267816	0.125661
P11021	HSPA5	0.227271	0.126326
Q6UXB8	PI16	-0.226315	0.126754
O43505	B4GAT1	0.278996	0.127414
P04433	IGKV3-11	0.13275	0.127845
P05109	S100A8	-0.293207	0.129441
O00391	QSOX1	0.188983	0.129471
A0A0B4J1V2	IGHV2-26	0.151977	0.129888
O60462	NRP2	-0.232787	0.130765
P24043	LAMA2	0.256613	0.130942
P0DOX5		0.128096	0.1313
P11150	LIPC	0.262537	0.131969
A0A075B6J1	IGLV5-37	-0.327689	0.132048
O60762	DPM1	0.407977	0.132816
Q6UY14	ADAMTSL4	0.232127	0.133081
P26992	CNTFR	0.334234	0.133779
Q68DL7	C18orf63	0.249968	0.134166
Q92674	CENPI	-0.366466	0.135797
P00738	HP	-0.177318	0.139996
P12830	CDH1	0.196756	0.141061
P16233	PNLIP	-0.672331	0.142696
Q7Z7M8	B3GNT8	0.319725	0.1436
Q9NY15	STAB1	0.335294	0.145367
Q9H2X3;Q9NNX6	CLEC4M;CD209	-0.350179	0.149058
Q9BXN1	ASPN	-0.277785	0.150402
P27169	PON1	0.13437	0.15062
P01854	IGHE	-0.192335	0.151364
P19827	ITIH1	0.17513	0.152144
P55290	CDH13	0.257608	0.152781
A0A075B6K0	IGLV3-16	-0.118159	0.153898
P05062	ALDOB	-0.177328	0.154675
P22105	TNXB	0.247976	0.157583
Q01459	CTBS	0.153227	0.157697
P12821	ACE	0.213292	0.158671
P00746	CFD	0.161212	0.158943
Q8IWL1;Q8IWL2	SFTPA2;SFTPA1	0.302059	0.160915
P07686	HEXB	-0.173633	0.161012
P02461	COL3A1	0.256517	0.162584
Q15063	POSTN	0.179153	0.162972
A0A075B6K6	IGLV4-3	-0.254557	0.16372
Q13200	PSMD2	-0.309501	0.163835
P05543	SERPINA7	-0.0546495	0.164409
P05362	ICAM1	-0.187381	0.164881
Q9BY67	CADM1	-0.288	0.166024
P55072	VCP	-0.402925	0.171401
P0DOX6		0.124332	0.17177
Q12788	TBL3	-0.258503	0.172336
A0A075B6S6	IGKV2D-30	-0.0970308	0.172508
P47874	OMP	-0.460422	0.172556
O14498	ISLR	0.204909	0.173185
P0DOX7		0.115863	0.173779
Q99972	MYOC	0.315744	0.175087
Q7L1S5	CHST9	0.111906	0.175105
P08697	SERPINF2	0.188747	0.176286
Q9ULM0	PLEKHH1	-0.53928	0.176369
P12814	ACTN1	-0.274737	0.176394
P04439	HLA-A	-0.305415	0.177639
P02750	LRG1	-0.203208	0.178236
Q9UBG0	MRC2	0.303905	0.178761
P05976	MYL1	0.394152	0.180562
Q96EE4	CCDC126	-0.264874	0.182001
Q9NPH3	IL1RAP	0.114917	0.183038
P05106	ITGB3	-0.287802	0.183557
P36980	CFHR2	-0.0860052	0.184407
Q16270	IGFBP7	0.28355	0.184482
P40189	IL6ST	-0.261354	0.185052
O95450	ADAMTS2	-0.195826	0.18574
Q8IUK5	PLXDC1	0.37735	0.188004
P08253	MMP2	0.192204	0.189806
Q96M91	CFAP53	-0.41448	0.190326
P01700	IGLV1-47	-0.112697	0.191284
P68366	TUBA4A	-0.374427	0.191407
P19021	PAM	0.287334	0.191431
Q86UN3	RTN4RL2	-0.262226	0.19147
Q8TER0	SNED1	0.277601	0.191666
P62937	PPIA	-0.267881	0.192253
Q9NP78	ABCB9	-0.211726	0.193214
Q5T749	KPRP	0.304696	0.19635
O60645	EXOC3	-0.143616	0.197295
P06727	APOA4	0.244234	0.198867
Q9P232	CNTN3	0.245168	0.200585
Q92743	HTRA1	0.325925	0.201349
P15144	ANPEP	-0.19177	0.201978
P35247	SFTPD	-0.193958	0.202902
Q9UBX5	FBLN5	0.243079	0.203259
Q16836	HADH	0.43932	0.205561
P01019	AGT	0.116037	0.206433
P25786	PSMA1	-0.354264	0.207134
P22891	PROZ	0.170568	0.207242
Q15166	PON3	0.125651	0.208023
Q13231	CHIT1	0.364691	0.208025
P04217	A1BG	-0.143971	0.209247
P10451	SPP1	-0.241697	0.214227
Q9BTU6	PI4K2A	-0.286632	0.214892
O75083	WDR1	-0.344083	0.215075
A0A0C4DH29	IGHV1-3	0.175145	0.217404
P28827	PTPRM	0.22339	0.217954
Q9NZK5	ADA2	-0.156363	0.217999
P11047	LAMC1	0.255723	0.218802
O75940	SMNDC1	-0.250523	0.220161
Q8NDA2	HMCN2	-0.423162	0.220551
P18850	ATF6	0.239721	0.220875
P81605	DCD	-0.241821	0.221293
P07358	C8B	0.141289	0.221502
P23083	IGHV1-2	-0.133585	0.223859
A0A0B4J1V7	IGHV7-81	-0.530979	0.223914
P15085	CPA1	-0.259132	0.225617
P29401	TKT	-0.209006	0.226765
P39059	COL15A1	0.315174	0.229729
P06753	TPM3	-0.301099	0.231036
P32942	ICAM3	-0.183572	0.232192
Q08554	DSC1	-0.303965	0.232848
P49913	CAMP	-0.107171	0.233396
Q9UBX1	CTSF	0.205919	0.233684
Q13201	MMRN1	-0.198546	0.233769
P55056	APOC4	-0.117122	0.234212
Q12841	FSTL1	0.229764	0.234379
Q8IZA0	KIAA0319L	0.451472	0.235417
P12273	PIP	-0.243187	0.235578
P23284	PPIB	-0.345426	0.235623
P26572	MGAT1	-0.214812	0.237997
P02452	COL1A1	0.2584	0.24086
P31151	S100A7	-0.267434	0.244049
P00742	F10	-0.153711	0.244869
P12259	F5	0.117165	0.245112
Q9H4B7	TUBB1	0.314026	0.245891
Q02818	NUCB1	-0.235727	0.247206
Q13228	SELENBP1	-0.237233	0.249794
O60312	ATP10A	-0.137347	0.250531
P01893	HLA-H	0.0756812	0.253151
P01766	IGHV3-13	-0.143786	0.25369
Q04695	KRT17	-0.318047	0.254874
P0C0L4	C4A	-0.0988319	0.256168
P07737	PFN1	-0.24941	0.256343
P15291	B4GALT1	0.189229	0.256631
Q9BUN1	MENT	0.176145	0.25765
Q13418	ILK	-0.396945	0.258589
P13473	LAMP2	-0.20447	0.259173
P30101	PDIA3	-0.232502	0.260219
Q14956	GPNMB	-0.149428	0.261985
Q9UBP4	DKK3	-0.207106	0.26334
P67936	TPM4	-0.245283	0.263959
Q12931	TRAP1	-0.224359	0.266232
P05387	RPLP2	-0.0886968	0.266527
P10321	HLA-C	-0.166563	0.267339
Q13113	PDZK1IP1	0.299871	0.268199
Q7Z7G0	ABI3BP	-0.139814	0.269581
Q86SQ4	ADGRG6	0.142951	0.269619
Q15642	TRIP10	-0.270061	0.269647
P02760	AMBP	0.131786	0.270301
P09486	SPARC	-0.31853	0.271196
P09382	LGALS1	0.314595	0.271928
P07451	CA3	-0.274964	0.273702
A0A075B6I3	IGLV11-55	-0.195001	0.276141
P07148	FABP1	-0.27639	0.276897
A0A0C4DH43	IGHV2-70D	0.0857675	0.277238
P22792	CPN2	0.103807	0.277567
Q9H299	SH3BGRL3	-0.227619	0.284027
P00915	CA1	-0.232396	0.286138
P13716	ALAD	-0.280692	0.286333
O14618	CCS	-0.43789	0.286418
P12109	COL6A1	-0.152963	0.286726
O00151	PDLIM1	0.247994	0.287925
P08311	CTSG	0.198394	0.288276
Q9Y4L1	HYOU1	0.208991	0.288761
Q01973	ROR1	-0.492334	0.29193
Q8TDL5	BPIFB1	0.141853	0.294603
P01601	IGKV1D-16	0.173854	0.294869
Q6Q788	APOA5	0.162184	0.295205
Q6P2D8	XRRA1	0.232393	0.296204
Q99684	GFI1	-0.127222	0.29697
A0A0A0MRZ9	IGLV5-52	0.145747	0.296982
P23528	CFL1	-0.219796	0.297509
Q9UKU6	TRHDE	-0.13976	0.297857
Q92496	CFHR4	-0.116962	0.29863
Q9UBR2	CTSZ	-0.182985	0.298657
A0A0G2JMI3	IGHV1-69-2	-0.119789	0.299227
P36404	ARL2	-0.200606	0.30025
P04430	IGKV1-16	0.0820302	0.302468
P27797	CALR	0.188499	0.306354
P02654	APOC1	0.137439	0.307197
P02746	C1QB	0.162859	0.310409
P04040	CAT	-0.210196	0.310685
P14207	FOLR2	0.201042	0.31118
O95479	H6PD	0.116269	0.312208
Q9BTY2	FUCA2	-0.0662835	0.312452
P08238	HSP90AB1	0.201789	0.312813
Q9NP80	PNPLA8	0.091412	0.312943
P02042	HBD	-0.218071	0.313085
P63104	YWHAZ	-0.214136	0.317939
P00558	PGK1	-0.21663	0.321653
A0A087WSY4	IGHV4-30-2	-0.239413	0.323444
Q8IXL6	FAM20C	-0.210541	0.325117
P60174	TPI1	-0.202148	0.325289
P50395	GDI2	-0.245302	0.325604
Q15942	ZYX	-0.225096	0.3262
P04004	VTN	-0.112794	0.327676
A0A075B6I0	IGLV8-61	-0.0628385	0.329128
P24158	PRTN3	-0.27697	0.331638
P17813	ENG	0.22454	0.335149
A0A087WSY6	IGKV3D-15	0.0667532	0.336352
Q16853	AOC3	-0.105256	0.336731
Q99784	OLFM1	0.164379	0.336965
Q8NI99	ANGPTL6	0.170527	0.337015
P04259	KRT6B	-0.212349	0.337801
Q8N6C8	LILRA3	0.10796	0.337908
Q16706	MAN2A1	0.157298	0.338163
A6NHG4;P30046	DDTL;DDT	-0.22342	0.341302
Q7Z7M0	MEGF8	0.149191	0.341709
Q9BS26	ERP44	-0.298943	0.342073
P62258	YWHAE	-0.287904	0.342229
P61604	HSPE1	-0.202503	0.345959
Q13164	MAPK7	0.212701	0.348314
P11279	LAMP1	-0.155374	0.350037
Q13477	MADCAM1	-0.288972	0.350402
Q6P179	ERAP2	0.16582	0.350449
P07307	ASGR2	-0.140293	0.350699
P08294	SOD3	0.156325	0.353063
P60660	MYL6	-0.204978	0.354523
A0A075B6R9;A0A0C4DH68	IGKV2D-24;IGKV2-24	0.0752598	0.355687
P35590	TIE1	0.142787	0.35611
P00918	CA2	-0.198574	0.358308
P55083	MFAP4	-0.181111	0.36041
A0A075B6S2	IGKV2D-29	-0.0453275	0.361143
P62328	TMSB4X	-0.197801	0.362708
P80748	IGLV3-21	-0.0695423	0.363199
P17174	GOT1	0.153829	0.36549
P02656	APOC3	-0.0816271	0.366637
P01011	SERPINA3	0.129419	0.36806
P98160	HSPG2	0.152649	0.369037
Q96FE7	PIK3IP1	0.219058	0.374021
Q10588	BST1	0.0785811	0.377365
Q14515	SPARCL1	0.135213	0.377508
Q9UKX5	ITGA11	0.424966	0.37951
P30043	BLVRB	-0.191235	0.380011
Q5XPI4	RNF123	0.14243	0.380234
P09668	CTSH	0.154216	0.381473
A0A0B4J1X8	IGHV3-43	0.0698887	0.38223
P14174	MIF	-0.222868	0.382615
A0A0B4J1V6	IGHV3-73	0.0880567	0.38344
O95477	ABCA1	-0.0619201	0.383489
Q12913	PTPRJ	-0.157788	0.385032
P01860	IGHG3	0.0425324	0.385126
Q76LX8	ADAMTS13	0.131643	0.385585
Q9H6X2	ANTXR1	0.177532	0.385798
P08637	FCGR3A	-0.103838	0.388384
Q07075	ENPEP	-0.177598	0.388489
P32119	PRDX2	-0.185002	0.391731
P07237	P4HB	-0.170539	0.392524
O95810	CAVIN2	0.233226	0.393444
P0DTE1	IGHV3-38-3	0.062679	0.39381
P24387	CRHBP	-0.185757	0.395131
P00492	HPRT1	0.304617	0.395434
P10912	GHR	-0.154755	0.39564
P69905	HBA1	-0.18238	0.396498
P30041	PRDX6	-0.16881	0.398565
Q13370	PDE3B	-0.186925	0.399201
P16070	CD44	-0.139851	0.399604
P08709	F7	-0.100399	0.399617
P37840	SNCA	-0.148008	0.405879
P04080	CSTB	0.169891	0.405995
A0A0B4J1Y9	IGHV3-72	0.0828317	0.407694
Q15149	PLEC	0.0974113	0.408809
Q13740	ALCAM	0.14733	0.410755
Q13867	BLMH	-0.153472	0.412124
Q86UD1	OAF	0.137172	0.414339
A0A0B4J2D9;P0DP09	IGKV1D-13;IGKV1-13	0.102312	0.415499
Q9C0C2	TNKS1BP1	0.192803	0.417482
P01889	HLA-B	0.150648	0.420027
P13489	RNH1	-0.173168	0.420114
P43652	AFM	0.0853563	0.421334
Q8WZ42	TTN	-0.144045	0.421751
P00451	F8	0.155743	0.421846
A0A075B6K2	IGLV3-12	0.0784287	0.423588
Q9Y490	TLN1	-0.171493	0.424167
P01709	IGLV2-8	-0.082617	0.424664
P07195	LDHB	-0.0971833	0.424895
Q07507	DPT	-0.153255	0.424989
P04196	HRG	0.078167	0.426391
Q9UM47	NOTCH3	0.133475	0.426761
P13671	C6	0.121241	0.426851
Q96IY4	CPB2	-0.0947311	0.428164
P52732	KIF11	0.0521036	0.428902
Q9Y2H1	STK38L	-0.1404	0.431474
Q9GZT8	NIF3L1	-0.193046	0.431978
Q8WWZ8	OIT3	-0.0769436	0.432501
P07988	SFTPB	0.0618507	0.434095
O14791	APOL1	0.087696	0.435056
P68871	HBB	-0.168277	0.435107
P23381	WARS1	-0.199553	0.436751
P18428	LBP	-0.119343	0.437265
A0A0C4DH24	IGKV6-21	-0.0593779	0.439168
P15814	IGLL1	0.0820307	0.43977
Q9UPQ3	AGAP1	-0.0824767	0.441586
Q13822	ENPP2	0.0979693	0.442201
Q9NTU7	CBLN4	-0.158835	0.446372
Q9H1U4	MEGF9	-0.154609	0.447426
Q8WWA0	ITLN1	0.10298	0.447776
Q8N159	NAGS	0.202146	0.450944
Q06033	ITIH3	0.0737644	0.452527
P08174	CD55	-0.137126	0.453248
Q99497	PARK7	-0.158722	0.453301
Q12884	FAP	-0.130573	0.455815
P08195	SLC3A2	0.0759763	0.45685
P49721	PSMB2	-0.218112	0.457258
P09493	TPM1	0.339933	0.46069
P25311	AZGP1	-0.118099	0.461398
P04180	LCAT	0.110826	0.462242
Q9Y646	CPQ	0.100368	0.467897
O00187	MASP2	-0.0726788	0.468213
P01833	PIGR	-0.0367103	0.469402
O43493	TGOLN2	-0.158654	0.472
P02774	GC	0.101191	0.473304
P23141	CES1	0.121867	0.474004
Q9UNN8	PROCR	-0.0855796	0.474026
P55285	CDH6	0.120063	0.475168
P56199	ITGA1	0.301567	0.475207
Q15223	NECTIN1	-0.148697	0.476223
P0DOX4		0.11345	0.482544
P69891	HBG1	-0.113022	0.485369
Q9P227	ARHGAP23	0.0758569	0.48598
P00736	C1R	0.111975	0.487873
Q9H4L5	OSBPL3	-0.130004	0.490251
P08581	MET	0.165632	0.490464
Q14623	IHH	0.128422	0.493441
Q9Y279	VSIG4	0.12121	0.493662
A0A075B6S9;P0DSN7	IGKV1-37;IGKV1D-37	-0.102572	0.494779
P02749	APOH	0.102972	0.496425
O15394	NCAM2	-0.165997	0.498125
P22894	MMP8	0.145805	0.49892
P42785	PRCP	-0.126259	0.499519
O15511	ARPC5	-0.235139	0.502858
P26927	MST1	0.0387049	0.503144
Q8IUL8	CILP2	-0.146422	0.503756
P13688	CEACAM1	-0.124799	0.504282
Q9Y2I9	TBC1D30	-0.053248	0.504602
Q13790	APOF	0.0896455	0.504811
P14314	PRKCSH	-0.13405	0.505859
P35579	MYH9	-0.139793	0.507131
Q9NS23	RASSF1	0.165566	0.50754
P07225	PROS1	0.103019	0.507632
P10599	TXN	-0.115977	0.509337
P00568	AK1	-0.161174	0.514024
P01591	JCHAIN	-0.0661636	0.514397
P04003	C4BPA	0.091614	0.516788
P68371	TUBB4B	-0.254896	0.518705
Q9ULI3	HEG1	0.121314	0.519746
P07384	CAPN1	0.10809	0.521927
P09172	DBH	0.0227243	0.522146
Q6ZRP7	QSOX2	-0.0876443	0.522213
P54802	NAGLU	-0.0662917	0.523295
P13598	ICAM2	0.100847	0.525841
P02679	FGG	0.0995553	0.527777
P23280	CA6	0.145629	0.527822
P05181	CYP2E1	-0.22879	0.528484
Q16563	SYPL1	0.104153	0.529027
B4DXR9	ZNF732	0.15876	0.529343
P07738	BPGM	-0.139357	0.530014
P54289	CACNA2D1	0.0707696	0.53046
P60985	KRTDAP	0.103663	0.531527
Q6RI45	BRWD3	-0.173181	0.533806
A0A0B4J1V1	IGHV3-21	-0.119507	0.533977
P0DTE7;P0DTE8;P0DUB6	AMY1B;AMY1C;AMY1A	0.0865747	0.534535
P60709;P63261	ACTB;ACTG1	-0.127694	0.534699
Q9NQ76	MEPE	-0.19391	0.535062
P32754	HPD	-0.15319	0.536319
P29622	SERPINA4	0.0909942	0.53637
O75339	CILP	-0.119997	0.537979
P06681	C2	-0.0609338	0.538617
Q9Y4D7	PLXND1	0.159961	0.539084
P06744	GPI	-0.141092	0.540158
P21333	FLNA	-0.124582	0.540385
Q6YHK3	CD109	-0.0889273	0.541687
Q5JPH6	EARS2	-0.201155	0.542172
Q13232	NME3	0.149177	0.542715
P32004	L1CAM	-0.137251	0.543154
A0A0C4DH67	IGKV1-8	-0.0664631	0.544322
P0DOY3	IGLC3	0.0650048	0.545065
Q9UGM5	FETUB	-0.0606484	0.545389
P00390	GSR	0.117897	0.545516
A0A0J9YX35	IGHV3-64D	0.0508807	0.547402
O75144	ICOSLG	-0.115646	0.548705
P37802	TAGLN2	-0.129288	0.550267
P18206	VCL	-0.112455	0.551249
A0A075B6H9	IGLV4-69	-0.0694858	0.553189
P01619	IGKV3-20	0.0452945	0.55329
P55103	INHBC	0.0868213	0.554613
P20933	AGA	-0.115515	0.554761
P08185	SERPINA6	-0.0803459	0.555762
Q96KG7	MEGF10	0.157315	0.559498
Q9UJJ9	GNPTG	-0.110955	0.559545
Q9BYE9	CDHR2	-0.0897259	0.560636
Q06418	TYRO3	0.132026	0.561292
Q96KN2	CNDP1	0.0472122	0.563213
P00352	ALDH1A1	-0.140577	0.563896
P07437	TUBB	0.130539	0.564979
Q14118	DAG1	0.0923598	0.566225
P36955	SERPINF1	0.0610295	0.568343
O00533	CHL1	0.0540144	0.571041
P01130	LDLR	-0.102616	0.573773
Q06830	PRDX1	-0.119388	0.573838
A0A0A0MT36	IGKV6D-21	0.039348	0.576313
P01762	IGHV3-11	-0.0781654	0.576688
P01782	IGHV3-9	0.0515405	0.578813
P02753	RBP4	0.0731237	0.580134
P04054	PLA2G1B	-0.296275	0.580911
P43307	SSR1	-0.0805199	0.583234
P08514	ITGA2B	0.115847	0.583292
Q9HBR0	SLC38A10	0.113068	0.583792
P35030	PRSS3	-0.102722	0.58383
Q9UIF9	BAZ2A	-0.117542	0.586838
A0A075B6J9	IGLV2-18	0.0280542	0.588847
P0DP01	IGHV1-8	0.0293745	0.590804
P15151	PVR	0.0761854	0.59243
P69892	HBG2	-0.0585055	0.592548
P23526	AHCY	0.225817	0.593561
O95445	APOM	0.0678996	0.595054
P48960	ADGRE5	-0.115322	0.595057
P99999	CYCS	0.098736	0.595284
P10586	PTPRF	0.0750047	0.597766
P10909	CLU	-0.0846531	0.598594
Q15848	ADIPOQ	-0.0596202	0.60005
Q14520	HABP2	-0.0609022	0.601079
O94985	CLSTN1	0.104881	0.605569
Q9Y5C1	ANGPTL3	-0.0825647	0.605651
P01024	C3	-0.0586582	0.607416
Q08830	FGL1	0.117743	0.608199
P00441	SOD1	-0.111847	0.608515
Q15404	RSU1	-0.173246	0.609255
O95274	LYPD3	-0.123988	0.612158
P06276	BCHE	-0.0431009	0.612772
A0A087WSX0	IGLV5-45	-0.0242514	0.613938
P05019	IGF1	0.0687971	0.614409
Q6E0U4	DMKN	0.104722	0.615158
A0A0J9YXX1	IGHV5-10-1	-0.0305108	0.615583
P02652	APOA2	0.0878204	0.619196
A0A0B4J1U7	IGHV6-1	0.0310479	0.619356
P08493	MGP	0.0945139	0.619988
P02671	FGA	0.0801097	0.620468
Q02413	DSG1	-0.171011	0.62072
P49765	VEGFB	0.132823	0.62074
Q9Y6C2	EMILIN1	-0.107484	0.621936
Q9BWP8	COLEC11	0.0534317	0.623275
P61626	LYZ	0.0648326	0.62388
P09871	C1S	0.0740464	0.624119
P47929	LGALS7	0.160186	0.624468
P80188	LCN2	-0.119537	0.626452
P08134;P61586	RHOC;RHOA	-0.41872	0.628042
P22692	IGFBP4	0.0765344	0.628604
P02675	FGB	0.0771664	0.630157
Q9NS71	GKN1	0.0891557	0.632746
P13796	LCP1	0.0668533	0.63715
P02751	FN1	0.0706717	0.63761
P05023;P13637;P50993;P54707;Q13733	ATP1A1;ATP1A3;ATP1A2;ATP12A;ATP1A4	0.072707	0.639156
P11226	MBL2	-0.0195971	0.6412
P34096	RNASE4	-0.0714072	0.641823
P19961	AMY2B	-0.107721	0.643797
P01344	IGF2	-0.0788952	0.644088
P00325	ADH1B	-0.114397	0.644416
P14625	HSP90B1	0.0522137	0.647459
Q13332	PTPRS	-0.093737	0.648602
Q8TBE9	NANP	-0.0579748	0.648613
P09960	LTA4H	-0.042582	0.649497
P01602	IGKV1-5	0.0647629	0.651611
Q02747	GUCA2A	-0.0693134	0.653581
P11362	FGFR1	0.0975845	0.654073
P01597;P04432	IGKV1-39;IGKV1D-39	0.0757218	0.654374
Q9NPG4	PCDH12	0.0977422	0.655258
P11717	IGF2R	0.0583574	0.657266
P24298	GPT	-0.0965588	0.658508
Q32P28	P3H1	-0.0841398	0.658513
P07996	THBS1	0.0949203	0.660387
P0DOX8		0.0501814	0.660596
Q9NSC7	ST6GALNAC1	0.122586	0.661041
P08603	CFH	0.0545188	0.66113
P42226	STAT6	0.0403697	0.66128
P49747	COMP	-0.0606242	0.661839
P02790	HPX	0.0459942	0.662556
A0A0A0MS15	IGHV3-49	0.0316503	0.662588
Q5ZPR3	CD276	0.172354	0.664857
P06732	CKM	-0.0884926	0.667688
P11142	HSPA8	0.084793	0.668894
P01031	C5	-0.0587827	0.669849
P14780	MMP9	0.0858469	0.670865
P27487	DPP4	-0.0432286	0.673618
A0A0C4DH35	IGHV3-35	0.0481842	0.67626
A0A075B6Q5	IGHV3-64	-0.0517069	0.676706
A0A075B6I9	IGLV7-46	0.0368505	0.678015
P13727	PRG2	0.0496924	0.678618
P01861	IGHG4	-0.013557	0.681389
O95428	PAPLN	0.0978606	0.683981
P06315	IGKV5-2	-0.042331	0.685121
P02748	C9	-0.0547148	0.690852
P62826	RAN	0.0862828	0.694708
Q92520	FAM3C	0.0665002	0.695064
Q96S96	PEBP4	0.0549361	0.696304
P01824	IGHV4-39	0.0783213	0.698351
Q93063	EXT2	-0.101728	0.702507
A0A0C4DH25	IGKV3D-20	-0.0461738	0.704042
P04114	APOB	-0.0441185	0.705233
A0A0A0MS14	IGHV1-45	0.031258	0.706117
P05160	F13B	0.0595064	0.706806
P01742	IGHV1-69	-0.0416678	0.708143
P62873	GNB1	-0.0881638	0.708757
Q9HDC9	APMAP	-0.0251413	0.710614
P01624	IGKV3-15	-0.0499666	0.711926
P07360	C8G	-0.0447989	0.712843
Q9P2S5	WRAP73	0.0495286	0.712857
O15204	ADAMDEC1	-0.0642143	0.715198
P04275	VWF	0.0563162	0.716037
P31146	CORO1A	-0.0743262	0.71837
P17936	IGFBP3	-0.0535422	0.720121
Q4LDE5	SVEP1	-0.0780092	0.720534
P17858	PFKL	-0.105336	0.723085
P36222	CHI3L1	-0.0709317	0.72316
Q9GZT6	CCDC90B	-0.102287	0.723941
P38606	ATP6V1A	0.0638389	0.728925
Q14624	ITIH4	-0.0417526	0.729996
Q96HD1	CRELD1	0.0794006	0.7301
P01717	IGLV3-25	-0.0347066	0.73124
P01817	IGHV2-5	-0.0325477	0.734793
P00740	F9	0.0395914	0.736981
P17301	ITGA2	-0.0705952	0.738338
P0CG23	ZNF853	-0.023764	0.739033
P22897	MRC1	-0.0399897	0.742785
P07911	UMOD	0.0384855	0.744248
P20062	TCN2	-0.132073	0.746067
O43866	CD5L	0.0278089	0.746089
Q12907	LMAN2	-0.0685669	0.747465
Q9HCL0	PCDH18	-0.0884385	0.748704
P14209	CD99	0.0652322	0.750728
P24593	IGFBP5	-0.0538532	0.758004
Q96PL1	SCGB3A2	-0.0531197	0.759162
P80108	GPLD1	0.0264942	0.761004
P48637	GSS	-0.0734369	0.761284
Q9C0D0	PHACTR1	0.0795165	0.763045
P61224	RAP1B	-0.0653554	0.763354
A0A0C4DH34	IGHV4-28	0.0399587	0.763659
P04211	IGLV7-43	-0.0283279	0.763754
Q14697	GANAB	-0.0637161	0.76442
Q13421	MSLN	0.0625438	0.764486
P07357	C8A	0.0394974	0.76637
Q6GTS8	PM20D1	-0.0243343	0.768243
P30530	AXL	0.060726	0.768516
O75874	IDH1	0.0691696	0.769614
P13224	GP1BB	-0.0986528	0.772256
P54108	CRISP3	-0.030207	0.772411
O00592	PODXL	-0.0575487	0.772553
O15287	FANCG	0.0333716	0.773704
P01699	IGLV1-44	0.0306558	0.77834
Q9UK55	SERPINA10	-0.0344374	0.778513
P05155	SERPING1	-0.0327646	0.781329
Q14691	GINS1	0.107658	0.782315
Q96RL7	VPS13A	-0.0643753	0.782774
P09619	PDGFRB	0.0504611	0.783747
Q14574	DSC3	0.0479038	0.785183
A0A087WSZ0	IGKV1D-8	-0.0306738	0.786056
O75828;P16152	CBR3;CBR1	-0.189433	0.786059
P08571	CD14	-0.0362675	0.786655
Q12860	CNTN1	0.042274	0.786795
P00491	PNP	-0.0605639	0.786889
P0DPH7;P0DPH8;P68363;Q6PEY2;Q71U36	TUBA3C;TUBA3D;TUBA1B;TUBA3E;TUBA1A	-0.0675734	0.788117
Q9P121	NTM	0.0801143	0.790534
P28799	GRN	-0.0502049	0.790827
P01703	IGLV1-40	-0.0236163	0.791929
P60900	PSMA6	-0.0638271	0.792216
P04066	FUCA1	0.0161476	0.792375
P05556	ITGB1	0.0513177	0.793012
P15169	CPN1	0.0253909	0.793488
P01721	IGLV6-57	-0.0297255	0.794304
P35555	FBN1	0.0493133	0.794682
P01780	IGHV3-7	-0.0365634	0.796595
O15031	PLXNB2	-0.0569148	0.79682
P05451	REG1A	-0.032582	0.797048
P63241;Q6IS14;Q9GZV4	EIF5A;EIF5AL1;EIF5A2	-0.0623978	0.799397
P00338	LDHA	-0.0400221	0.801377
P19022	CDH2	-0.0391062	0.801711
Q8NBS9	TXNDC5	0.0645413	0.804084
P04070	PROC	0.0302824	0.806611
Q13508	ART3	0.137985	0.806995
Q0VAA2	LRRC74A	0.0485209	0.80722
A0A0C4DH30	IGHV3-16	-0.0668005	0.808367
P08123	COL1A2	-0.0802812	0.813513
P53634	CTSC	0.0468646	0.814181
P13591	NCAM1	-0.0348285	0.814904
P0DOX3		0.02295	0.817386
P02549	SPTA1	-0.0545908	0.818032
P22352	GPX3	0.0352589	0.821477
P46459	NSF	0.128584	0.822227
Q9UHG3	PCYOX1	-0.0324512	0.822611
Q8IXS2	CCDC65	-0.0189687	0.824683
P48740	MASP1	0.0227536	0.825545
Q16610	ECM1	-0.0282974	0.826287
Q7Z460	CLASP1	0.0343634	0.829473
P46531	NOTCH1	0.0640703	0.829518
Q9UIL4	KIF25	-0.0242996	0.832435
P19256	CD58	-0.055704	0.834238
P10646	TFPI	0.033352	0.83547
Q92484	SMPDL3A	-0.0365773	0.835704
Q07954	LRP1	0.0351079	0.836298
P08519	LPA	-0.0223503	0.837385
P39060	COL18A1	-0.0282835	0.838277
P35916	FLT4	-0.0348894	0.839127
Q9Y5Y7	LYVE1	-0.0335733	0.8408
A0A075B6H7	IGKV3-7	0.0251143	0.842758
Q9H4A9	DPEP2	-0.0366008	0.842946
P01825	IGHV4-59	-0.0176892	0.843669
P13497	BMP1	0.043808	0.84455
Q96PV7	FAM193B	0.0752418	0.845633
A0A075B6K4	IGLV3-10	-0.00761576	0.846702
O14950;P19105	MYL12B;MYL12A	-0.0482491	0.851576
P01599	IGKV1-17	-0.0141743	0.851635
P02730	SLC4A1	0.0400195	0.851635
P16035	TIMP2	0.0319267	0.854538
O75015	FCGR3B	0.0237097	0.854838
O76061	STC2	0.0445311	0.855001
P02776	PF4	0.0383789	0.860097
A0A0C4DH38	IGHV5-51	0.0119204	0.860726
A0A075B6I1	IGLV4-60	-0.0383149	0.864433
P01701	IGLV1-51	0.00988845	0.864676
P01876	IGHA1	0.0241493	0.866713
O75368	SH3BGRL	0.0413277	0.867769
P04156	PRNP	-0.0382037	0.868621
P02144	MB	0.0256312	0.870987
P0DP08	IGHV4-38-2	0.0389565	0.872555
P31025	LCN1	-0.0425419	0.872706
P08567	PLEK	0.0419402	0.874503
P07602	PSAP	0.0315358	0.875081
A2NJV5	IGKV2-29	0.0135832	0.876471
P01704	IGLV2-14	0.0116348	0.876864
Q14766	LTBP1	0.0619505	0.878408
P07858	CTSB	0.0213938	0.878677
Q92696	RABGGTA	-0.0273737	0.879839
Q8N5W9	RFLNB	0.0197925	0.880792
A0A0C4DH73;P01611	IGKV1-12;IGKV1D-12	-0.018019	0.881722
P02775	PPBP	-0.0308711	0.882195
P40197	GP5	-0.0287075	0.882298
Q9BXR6	CFHR5	-0.0119738	0.885527
Q9NZT1	CALML5	-0.0332124	0.887189
P02765	AHSG	-0.0189132	0.887192
Q6GPI1	CTRB2	-0.0189604	0.888309
P17900	GM2A	0.0291784	0.889452
Q8NBJ4	GOLM1	0.0238682	0.891061
Q92823	NRCAM	0.0238459	0.891622
P04075	ALDOA	-0.021804	0.895639
P01034	CST3	0.0206926	0.897152
P00488	F13A1	-0.019081	0.898535
P13987	CD59	-0.0239335	0.900861
P16112	ACAN	-0.0212003	0.907002
Q13643	FHL3	0.021356	0.908694
P10645	CHGA	0.0240971	0.908959
Q86W92	PPFIBP1	-0.0352588	0.909191
Q15828	CST6	0.0216916	0.909475
P08779	KRT16	0.0325512	0.911289
Q32P41	TRMT5	-0.0126505	0.91143
P01880	IGHD	-0.00457237	0.912085
A0A0C4DH31	IGHV1-18	-0.0118456	0.914905
P14923	JUP	0.0775402	0.917428
Q99650	OSMR	-0.0230582	0.917438
O95429	BAG4	0.0541999	0.918477
P07478	PRSS2	-0.0184044	0.9233
A0A0B4J1U3	IGLV1-36	-0.00767108	0.924789
Q12796	PNRC1	0.00802534	0.925861
Q7Z3B1	NEGR1	0.0183679	0.92628
Q86UX7	FERMT3	0.0206669	0.927921
P05121	SERPINE1	0.0252953	0.93115
P12318;P31995	FCGR2A;FCGR2C	-0.0109928	0.931468
P00450	CP	-0.00910356	0.931713
P01705	IGLV2-23	-0.00922036	0.9329
Q15465	SHH	-0.0181701	0.932982
P06312	IGKV4-1	-0.00756588	0.93315
Q86TH1	ADAMTSL2	0.0101233	0.933664
P01772	IGHV3-33	0.00783778	0.937286
P02689;P15090	PMP2;FABP4	0.0146843	0.939131
O75127	PTCD1	0.0094866	0.945575
P19320	VCAM1	0.00809445	0.945852
P51884	LUM	-0.0115671	0.946602
P78417	GSTO1	0.00994345	0.948677
A0A075B6J2	IGLV2-33	-0.00564185	0.949052
P11277	SPTB	-0.0147435	0.949234
P17931	LGALS3	0.0124466	0.951734
P25788	PSMA3	-0.0147353	0.953634
P19971	TYMP	0.0230985	0.955111
P14543	NID1	0.00814677	0.955193
P00748	F12	0.00506554	0.956437
P07998	RNASE1	-0.00878246	0.956954
P55058	PLTP	0.00840531	0.959335
Q01469	FABP5	-0.0106282	0.964076
P14151	SELL	0.00590506	0.964163
P01042	KNG1	-0.00580547	0.965797
P41222	PTGDS	-0.00773991	0.968117
Q9NQ38	SPINK5	0.00846581	0.968784
P07333	CSF1R	0.00585507	0.970411
P0DOX2		0.00479252	0.970918
P61916	NPC2	-0.00699595	0.972638
A0A0G2JS06	IGLV5-39	0.00228911	0.977858
Q9Y287	ITM2B	0.00755187	0.978002
P14618	PKM	0.00549341	0.978197
O14960	LECT2	-0.00259681	0.97989
Q8IZF2	ADGRF5	0.00408361	0.979964
O75882	ATRN	0.00288248	0.9845
P03973	SLPI	-0.00340547	0.985876
Q14683	SMC1A	0.00275264	0.987278
Q9HCU0	CD248	0.00211892	0.98732
P08861	CELA3B	0.00339093	0.988866
Q0VDD8	DNAH14	-0.00376868	0.989004
Q02223	TNFRSF17	0.00274096	0.9896
O95980	RECK	0.00195496	0.993685
Q9HBB8	CDHR5	0.00121506	0.996168
P24844	MYL9	-0.00135858	0.99694
O60281	ZNF292	0.000890661	0.997237
A0A0C4DH36	IGHV3-38	-0.000288064	0.997445
Q9UEW3	MARCO	0.000560196	0.997625
P26447	S100A4	0.000214989	0.999293
Q9NY97	B3GNT2	0.000107306	0.999563
A0A0C4DH32	IGHV3-20	6.17695e-05	0.999629
P01593;P01594	IGKV1D-33;IGKV1-33	7.3921e-06	0.999949

## Sheet: Depleted
ProteinID	GeneID	Estimate	P_value
P02792	FTL	-0.637527	2.71518e-07
Q9NPY3	CD93	0.781394	3.33899e-06
P33151	CDH5	0.614737	8.52545e-06
P02794	FTH1	-0.541625	2.12399e-05
P02786	TFRC	0.582366	3.29727e-05
P02652	APOA2	-0.429868	7.4708e-05
P02649	APOE	-0.405479	0.000109596
O75636	FCN3	-0.245402	0.00016908
P35542	SAA4	-0.407414	0.000240985
A1L4H1	SSC5D	-0.632476	0.000253069
P04179	SOD2	0.591294	0.000283705
Q14118	DAG1	0.50168	0.000328746
Q9P0K7	RAI14	-1.28719	0.000360468
Q92954	PRG4	-0.45939	0.000492597
Q8WZ75	ROBO4	0.45052	0.000601914
P02743	APCS	-0.448933	0.000902847
P02655	APOC2	-0.323211	0.0010871
O75874	IDH1	-0.466215	0.00112358
P20742	PZP	-0.11585	0.00113184
P16930	FAH	-0.427723	0.0012436
P07942	LAMB1	0.420635	0.00136464
P21695	GPD1	-0.404561	0.0014219
P00326	ADH1C	-0.452463	0.00163327
Q9UJA9	ENPP5	0.470751	0.00167609
Q13093	PLA2G7	-0.325302	0.00193525
P01023	A2M	0.236183	0.00204711
Q9UNM6	PSMD13	0.73805	0.0022634
P55056	APOC4	-0.25287	0.00256716
P49913	CAMP	-0.239393	0.00300125
O14786	NRP1	0.425393	0.00332439
P36871	PGM1	-0.328591	0.00337818
Q6UXI9	NPNT	0.495309	0.00379193
O15117	FYB1	1.42784	0.00501313
Q6UVK1	CSPG4	0.378423	0.00501909
Q9BPW8	NIPSNAP1	0.471606	0.00507011
P0DJI8	SAA1	-0.386016	0.0050957
Q8N307	MUC20	0.916778	0.00521729
P04278	SHBG	0.237342	0.00523423
A8K2U0	A2ML1	0.788563	0.00563063
P02654	APOC1	-0.270598	0.00569997
Q08380	LGALS3BP	-0.276712	0.00584309
O43157	PLXNB1	0.335706	0.00592529
Q04695	KRT17	0.632053	0.00614512
O75509	TNFRSF21	0.468675	0.00647477
O14791	APOL1	-0.314109	0.00647528
P05067	APP	0.596261	0.00658389
Q9H0X4	FAM234A	0.539175	0.00710447
Q9BYE9	CDHR2	-0.196093	0.00710612
P02533	KRT14	0.524626	0.00744788
O14793	MSTN	-0.34468	0.00752527
P18065	IGFBP2	0.247978	0.00761276
Q9Y6R7	FCGBP	-0.235586	0.0076743
P25774	CTSS	-0.382559	0.00797626
P55058	PLTP	-0.44177	0.00885819
P42785	PRCP	-0.362018	0.00888932
P13639	EEF2	-0.436799	0.00894974
Q14767	LTBP2	0.371283	0.00900855
O00194	RAB27B	0.616938	0.00921936
P30046	DDT	-0.413056	0.00965232
P16581	SELE	-0.338568	0.0096694
P18428	LBP	-0.444949	0.0103686
P43121	MCAM	0.411696	0.0105907
Q9UHL4	DPP7	0.30888	0.0106454
P00325	ADH1B	-0.427922	0.0108301
O95445	APOM	-0.305336	0.0110159
Q92484	SMPDL3A	0.165426	0.0113139
P42892	ECE1	0.543851	0.0118094
P55290	CDH13	0.376588	0.0119047
P08887	IL6R	-0.336957	0.0121515
Q8WWV6	FCAMR	-0.295633	0.0122516
P08236	GUSB	-0.184155	0.0122985
O00748	CES2	-0.440141	0.0124374
P23141	CES1	-0.201404	0.0125354
Q9NVC6	MED17	0.13571	0.0130977
Q6NY19	KANK3	-0.333596	0.0134779
O00231	PSMD11	0.525455	0.014058
Q9H792	PEAK1	0.210521	0.0140652
P12109	COL6A1	-0.248042	0.0142136
P11766	ADH5	-0.448682	0.0152023
P33908	MAN1A1	-0.460944	0.0157077
P0DJI9	SAA2	-0.385384	0.0161829
P33402	GUCY1A2	-0.434779	0.0171674
Q9UKU6	TRHDE	-0.205953	0.0175217
P15311	EZR	-0.377963	0.0176294
Q8NGM9	OR8D4	1.03798	0.0177351
Q6UWW8	CES3	-0.3468	0.0192952
Q9UEW3	MARCO	-0.317395	0.0195181
Q8IUK5	PLXDC1	0.327752	0.0196905
Q3LXA3	TKFC	-0.343301	0.0204187
P51161	FABP6	0.347657	0.0206317
P58499	FAM3B	0.575634	0.0212823
P10912	GHR	-0.20715	0.0219811
P30622	CLIP1	-0.435534	0.0220768
Q9BQS7	HEPH	-0.455281	0.0222556
Q9H4B7	TUBB1	-0.450105	0.0229033
Q99707	MTR	-0.58192	0.0230139
Q12882	DPYD	-0.421788	0.0232759
Q7Z4W1	DCXR	-0.3541	0.0237606
Q09327	MGAT3	-0.309361	0.0239018
Q9HCB6	SPON1	0.301155	0.0245482
O60462	NRP2	0.340237	0.0251087
P0C0L4	C4A	-0.180964	0.0254201
P98160	HSPG2	0.397181	0.0257645
Q8WZA1	POMGNT1	0.284442	0.0266144
Q9NP78	ABCB9	-0.336542	0.0268859
Q6UWV6	ENPP7	-0.310419	0.0268915
P68366	TUBA4A	-0.462935	0.0272071
P29401	TKT	-0.264748	0.0274357
P07359	GP1BA	0.346112	0.0278716
P05090	APOD	-0.32569	0.0286667
Q96KN2	CNDP1	-0.244745	0.0287842
P25325	MPST	-0.422499	0.0291373
Q9NZL9	MAT2B	-0.515608	0.0291482
P05362	ICAM1	-0.303769	0.0293311
P02741	CRP	-0.41036	0.0297407
P13612	ITGA4	-0.403895	0.0298165
Q05707	COL14A1	0.34483	0.0301636
P37837	TALDO1	-0.348799	0.0301756
O43747	AP1G1	-0.386981	0.0314633
Q9NU53	GINM1	0.489538	0.0318487
P00966	ASS1	-0.40686	0.032537
Q9UKX5	ITGA11	0.550772	0.0335203
O95497	VNN1	-0.119761	0.0336217
Q86VB7	CD163	-0.232744	0.0341071
P24298	GPT	-0.336816	0.034179
P22003	BMP5	0.472812	0.0347639
P08294	SOD3	0.347305	0.0352688
Q9P2X0	DPM3	0.495921	0.0353756
Q92543	SNX19	-0.307161	0.0354368
Q99536	VAT1	-0.33801	0.0354471
Q8WXD2	SCG3	0.397219	0.0356959
Q6UXK5	LRRN1	-0.373473	0.0359507
P17039	ZNF30	0.412828	0.0360533
P17927	CR1	-0.315509	0.0361912
Q8TDQ0	HAVCR2	0.468989	0.0371638
P54108	CRISP3	0.228337	0.0373522
Q5VU97	CACHD1	-0.633228	0.0379192
P35226	BMI1	-0.444396	0.0385155
P34059	GALNS	0.228081	0.0387168
Q9HBR0	SLC38A10	0.271604	0.0396252
Q9Y266	NUDC	-0.500496	0.0397988
Q9NPR2	SEMA4B	-0.273359	0.0400455
P42081	CD86	-0.452186	0.0411509
P49721	PSMB2	-0.266322	0.0414736
Q9H1U4	MEGF9	-0.397666	0.0417412
O60732	MAGEC1	0.830913	0.042564
Q16851	UGP2	-0.221741	0.0435035
Q8N136	DAW1	-0.722281	0.0435986
O43150;Q9ULH1	ASAP2;ASAP1	0.764652	0.0446733
Q9BWS9	CHID1	-0.442728	0.0451554
Q02952	AKAP12	0.332231	0.045484
Q9BUN1	MENT	-0.297895	0.0465885
P09668	CTSH	-0.207529	0.0466106
P00338	LDHA	-0.327415	0.0469148
Q96J42	TXNDC15	-0.32306	0.0469458
P00352	ALDH1A1	-0.276903	0.0469998
Q9ULI1	NWD2	0.356451	0.0473976
Q04446	GBE1	-0.33396	0.0480373
P01024	C3	-0.352903	0.0485934
Q9UMX5	NENF	0.251547	0.0488939
Q6W2J9	BCOR	0.416563	0.0497305
Q96PD5	PGLYRP2	0.241953	0.0503985
Q9Y5X9	LIPG	-0.277367	0.0507911
P34932	HSPA4	-0.3221	0.0508573
Q9UHG3	PCYOX1	-0.256794	0.0509501
Q14126	DSG2	0.289635	0.0520812
P05156	CFI	-0.355418	0.0521812
P31153	MAT2A	-0.417134	0.0522211
P11047	LAMC1	0.316309	0.0523548
Q15485	FCN2	-0.23671	0.0541948
Q15811	ITSN1	-0.290527	0.0549042
P24043	LAMA2	0.277614	0.054958
P06858	LPL	0.308937	0.0553923
P41439	FOLR3	0.310367	0.0554777
P57076	CFAP298	-0.380654	0.0556049
Q6UX71	PLXDC2	0.332755	0.0557742
P48163	ME1	-0.254402	0.0566455
P04259	KRT6B	0.43443	0.05806
O43639;P16333	NCK2;NCK1	0.620916	0.0583389
P00751	CFB	-0.279852	0.0586684
Q8WTU2	SSC4D	-0.278368	0.0587576
P07998	RNASE1	0.376169	0.0588823
Q9Y678	COPG1	-0.692951	0.0589583
Q9Y4D7	PLXND1	0.324895	0.0590222
Q8NF67	ANKRD20A12P	-0.584465	0.0593511
P12111	COL6A3	0.291219	0.0596004
Q86TH1	ADAMTSL2	0.171176	0.0597572
P27930	IL1R2	0.24694	0.0599459
Q9HDC9	APMAP	-0.177808	0.0601248
O60687	SRPX2	-0.622457	0.0603941
P01911	HLA-DRB1	-0.306113	0.0605198
Q5JSH3	WDR44	-0.40714	0.0605968
Q9NNX6	CD209	-0.357773	0.0610804
P02656	APOC3	-0.169978	0.0610873
C9JJ37	BTBD19	0.314376	0.0613002
P19652	ORM2	-0.324707	0.0615216
Q9H8L6	MMRN2	0.169692	0.0615294
Q16832	DDR2	0.348099	0.0619525
P08254	MMP3	0.278506	0.061989
Q08257	CRYZ	-0.27265	0.063256
Q6PCE3	PGM2L1	-0.526649	0.0639139
Q9P1F3	ABRACL	-0.404988	0.0642024
P01602	IGKV1-5	-0.373976	0.064534
P60981	DSTN	-0.371762	0.0650367
Q9Y617	PSAT1	-0.299271	0.0659493
P08637	FCGR3A	-0.177154	0.0659625
Q01995	TAGLN	0.266829	0.0670185
Q16363	LAMA4	0.477624	0.0670698
P02675	FGB	-0.248282	0.0672779
Q96KP4	CNDP2	-0.407124	0.068346
Q5KU26	COLEC12	0.349221	0.0684634
P08319	ADH4	-0.27573	0.0685551
P02763	ORM1	-0.311219	0.0685833
Q9H159	CDH19	0.32809	0.0686915
P08195	SLC3A2	0.148396	0.0696683
Q9HAW4	CLSPN	-0.219693	0.0702431
O95803;Q9H3R1	NDST3;NDST4	-0.98311	0.0706456
Q13217	DNAJC3	0.292009	0.0709204
Q9BXX0	EMILIN2	-0.484913	0.0716762
P09417	QDPR	-0.326118	0.0718323
Q6NUS6	TCTN3	-0.344245	0.0745695
O75116	ROCK2	0.620369	0.0755213
Q06418	TYRO3	0.285204	0.0757648
P04114	APOB	-0.244193	0.0763471
P13688	CEACAM1	-0.288048	0.0764494
P28845	HSD11B1	0.301287	0.0775956
P13686	ACP5	-0.313715	0.0789959
O43866	CD5L	-0.158728	0.0794604
Q96S96	PEBP4	0.221433	0.0801436
O60667	FCMR	-0.256695	0.0803943
P56202	CTSW	0.454343	0.0807637
Q16539	MAPK14	-0.393489	0.0819791
P13647	KRT5	0.37677	0.0827876
P62805	H4C1	0.266749	0.0835423
P35613	BSG	0.523609	0.0840205
Q9UQ80	PA2G4	-0.279088	0.0844454
P0C0L5	C4B	-0.155343	0.0850538
P02812;P04280	PRB2;PRB1	-0.451656	0.0854786
Q8WWQ8	STAB2	-0.252054	0.0870861
P12955	PEPD	0.254455	0.0872177
P02549	SPTA1	0.744469	0.08766
P05062	ALDOB	-0.2195	0.0876717
P02679	FGG	-0.226293	0.0884394
Q9Y2V2	CARHSP1	0.477739	0.0889225
Q92747	ARPC1A	0.422043	0.089545
O75503	CLN5	0.150029	0.0895841
P23467	PTPRB	0.187649	0.0901702
P55285	CDH6	0.249292	0.0908062
Q9UPZ6	THSD7A	-0.387911	0.091109
P36222	CHI3L1	0.153595	0.0915982
Q6BDS2	BLTP3A	-0.276378	0.0920154
Q8NDA2	HMCN2	0.117322	0.0921691
P08603	CFH	-0.254482	0.0929067
Q8N6Q3	CD177	0.374305	0.0944304
Q08345	DDR1	0.334596	0.0944513
P16112	ACAN	-0.248656	0.0948245
O75147	OBSL1	0.260555	0.0952267
Q9Y240	CLEC11A	-0.444389	0.0952778
P46013	MKI67	-0.49631	0.0954956
O75356	ENTPD5	-0.230346	0.0958786
Q9NZ08	ERAP1	-0.0873898	0.0965779
P30613	PKLR	-0.454057	0.096661
Q96HD1	CRELD1	-0.304233	0.0972468
P18627	LAG3	-0.316046	0.0972652
P02787	TF	0.243978	0.0975888
P35998	PSMC2	0.669309	0.0984127
P32754	HPD	-0.225084	0.0994853
Q15911	ZFHX3	-0.228228	0.100468
P20231;Q15661	TPSB2;TPSAB1	-0.239455	0.100468
Q16881	TXNRD1	-0.319198	0.101388
P06733	ENO1	-0.281272	0.101576
Q9Y3B8	REXO2	0.535123	0.101994
Q86UN3	RTN4RL2	-0.210164	0.102083
P02538	KRT6A	0.326703	0.102231
Q6ZS92		0.376695	0.102298
P08575	PTPRC	-0.23573	0.102335
O75629	CREG1	-0.38451	0.103068
P12724	RNASE3	-0.423338	0.103166
Q9HCM4	EPB41L5	-0.380711	0.103509
P05997	COL5A2	0.339094	0.105733
P02765	AHSG	0.244428	0.106514
P58335	ANTXR2	-0.206832	0.107092
Q9Y5K6	CD2AP	0.533601	0.108747
Q9H2H9	SLC38A1	-0.301751	0.109694
P63313	TMSB10	-0.277445	0.110338
P28838	LAP3	-0.26832	0.110811
P04424	ASL	-0.267136	0.111383
P06727	APOA4	0.253304	0.111395
Q9H4A4	RNPEP	-0.237097	0.111678
O94933	SLITRK3	-0.177201	0.11174
P31415	CASQ1	-0.595159	0.112467
Q15942	ZYX	-0.311266	0.113516
P13645	KRT10	0.350441	0.114074
Q9UIW2	PLXNA1	-0.307148	0.114286
P51148	RAB5C	-0.288053	0.115095
Q96B86	RGMA	0.285929	0.115109
P62736	ACTA2	-0.347936	0.115826
Q16774	GUK1	0.48428	0.11617
P35908	KRT2	0.346076	0.116895
P01137	TGFB1	0.307532	0.116929
A0A0B4J1V2	IGHV2-26	-0.211273	0.117018
Q4G0U5	CFAP221	0.289289	0.117087
Q12884	FAP	0.252761	0.117278
P28062	PSMB8	-0.237473	0.118323
P06396	GSN	0.24741	0.118857
P25786	PSMA1	-0.183338	0.119281
P08263;P09210;Q16772;Q7RTV2	GSTA1;GSTA2;GSTA3;GSTA5	-0.284489	0.119435
Q13126	MTAP	-0.418674	0.120111
Q9UPS8	ANKRD26	-0.281307	0.120256
Q6UWP8	SBSN	0.208527	0.120561
Q9UK23	NAGPA	-0.241876	0.121304
P34096	RNASE4	0.292484	0.121366
Q9UIQ6	LNPEP	0.350283	0.121808
O75326	SEMA7A	-0.231988	0.123021
Q9UKJ1	PILRA	-0.275006	0.123081
P21399	ACO1	-0.271258	0.123558
Q9UJU6	DBNL	-0.317424	0.123694
Q8N4A0	GALNT4	-0.342057	0.124227
Q16378	PRR4	-0.295964	0.124236
P19256	CD58	0.246828	0.124761
Q9UBQ7	GRHPR	-0.288889	0.126966
Q14694	USP10	-0.355288	0.127208
P25788	PSMA3	-0.197558	0.128065
A0A0B4J1U7	IGHV6-1	-0.106734	0.128358
O00213	APBB1	-0.258988	0.128576
Q03167	TGFBR3	0.206689	0.128739
P13497	BMP1	-0.27519	0.128951
Q8WVM8	SCFD1	0.276353	0.129479
Q96CN7	ISOC1	-0.26019	0.129816
O60476	MAN1A2	-0.326115	0.130177
Q9HCL0	PCDH18	0.275277	0.13048
Q99650	OSMR	0.192961	0.130713
P69849;Q5JPE7	NOMO3;NOMO2	-0.222894	0.131615
Q9UJC5	SH3BGRL2	-0.292644	0.13202
Q9H173	SIL1	-0.346381	0.132578
P02671	FGA	-0.22357	0.132625
Q9H6N6	MYH16	0.317422	0.133035
P14384	CPM	-0.172108	0.134896
Q9NZP8	C1RL	-0.171707	0.135107
P17405	SMPD1	0.13863	0.135867
Q8TDL5	BPIFB1	-0.228215	0.135933
P06756	ITGAV	0.311049	0.136008
O43505	B4GAT1	-0.249993	0.13741
O00175	CCL24	-0.299197	0.137896
P68371	TUBB4B	-0.281591	0.138336
Q8NBP7	PCSK9	0.261938	0.138489
Q9NPG4	PCDH12	0.227235	0.139782
P22735	TGM1	0.634946	0.140024
P07355	ANXA2	0.324144	0.140485
Q96JM4	LRRIQ1	0.717779	0.14074
P01266	TG	-0.300245	0.140763
Q8N1G1	REXO1	0.848346	0.141587
O94818	NOL4	-0.204153	0.141918
Q9NY15	STAB1	0.207514	0.142303
O75309	CDH16	0.323333	0.142668
P12821	ACE	0.169378	0.142709
Q92520	FAM3C	0.211022	0.144667
P22455	FGFR4	0.349855	0.145061
Q02747	GUCA2A	0.219508	0.145731
Q9NYL9	TMOD3	0.43654	0.1458
Q8TDY8	IGDCC4	0.240052	0.146154
Q9UGT4	SUSD2	0.270947	0.146448
P02748	C9	-0.192149	0.146768
O00754	MAN2B1	-0.236327	0.147257
Q16288	NTRK3	0.243802	0.148104
O43405	COCH	0.346753	0.149771
Q9NS71	GKN1	0.194142	0.150014
P61086	UBE2K	0.382164	0.150203
O95810	CAVIN2	-0.289576	0.150214
Q86SQ4	ADGRG6	-0.211476	0.150243
P55209	NAP1L1	0.336507	0.150427
P00738	HP	-0.202989	0.151061
Q12907	LMAN2	0.224139	0.151405
Q9UBX1	CTSF	0.200572	0.151528
P0DMV8;P0DMV9	HSPA1A;HSPA1B	-0.263989	0.15211
Q9NY47	CACNA2D2	0.323298	0.152982
Q92823	NRCAM	-0.156036	0.153759
P08572	COL4A2	0.235013	0.153886
P13489	RNH1	-0.230251	0.154395
P51610	HCFC1	0.306212	0.154838
Q13485	SMAD4	0.285773	0.155201
A6NGU5;P19440	GGT3P;GGT1	-0.151358	0.155787
P68363	TUBA1B	-0.273305	0.155799
P04062	GBA1	-0.277901	0.156017
P08253	MMP2	0.248314	0.157155
Q15113	PCOLCE	0.231824	0.158097
Q99972	MYOC	0.191569	0.158434
Q9H3U7	SMOC2	0.265186	0.159447
P20340	RAB6A	-0.223984	0.160815
Q9UKK9	NUDT5	0.517359	0.161799
Q02413	DSG1	0.350883	0.161827
Q15262	PTPRK	-0.19503	0.162575
Q9UN70	PCDHGC3	0.308648	0.163095
P05026	ATP1B1	-0.265552	0.163158
P27918	CFP	-0.264331	0.163463
P55259	GP2	-0.500968	0.165371
Q96IY1	NSL1	0.311223	0.165924
Q9Y490	TLN1	-0.279597	0.166183
Q03154	ACY1	-0.173167	0.167011
A0A0A0MT89	IGKJ1	-0.143842	0.168186
O14960	LECT2	-0.18322	0.169356
P35241	RDX	-0.267571	0.169455
P52565	ARHGDIA	-0.238676	0.169685
Q06323	PSME1	-0.259075	0.170116
P04275	VWF	0.260031	0.170443
Q9Y275	TNFSF13B	-0.302572	0.170703
O75594	PGLYRP1	0.228033	0.172369
Q9BR84	ZNF559	0.2954	0.172594
P02766	TTR	0.238422	0.172669
Q7Z7F0	KHDC4	0.264684	0.173049
Q6UXH1	CRELD2	0.365236	0.173333
Q93033	CD101	0.199992	0.173653
Q9BYX7	POTEKP	-0.34707	0.173927
P48357	LEPR	0.20101	0.174079
P40199	CEACAM6	-0.240014	0.17473
O00187	MASP2	-0.20925	0.174976
Q13563	PKD2	-0.326205	0.175267
P01701	IGLV1-51	-0.0827116	0.176053
P31327	CPS1	0.377913	0.176242
P05109	S100A8	-0.238754	0.176866
Q99439	CNN2	0.282157	0.176981
P07900	HSP90AA1	-0.216498	0.177469
O15335	CHAD	-0.152636	0.178205
Q6Q788	APOA5	-0.153798	0.178452
Q9Y287	ITM2B	0.259543	0.179302
Q14789	GOLGB1	-0.383368	0.180406
P19022	CDH2	0.156003	0.18078
P17612	PRKACA	-0.292798	0.181562
Q9NR71	ASAH2	-0.2244	0.182128
P09871	C1S	-0.264246	0.182464
P35813	PPM1A	-0.262609	0.182853
O95450	ADAMTS2	0.257539	0.182978
Q6ZNG2	DBX2	-0.278111	0.183138
P30044	PRDX5	-0.263957	0.18331
P13727	PRG2	0.16492	0.183585
P13667	PDIA4	-0.266475	0.184099
P08237	PFKM	-0.358919	0.18455
P69905	HBA1	-0.219328	0.185002
Q14240	EIF4A2	-0.466691	0.185314
Q96DZ1	ERLEC1	0.252563	0.186262
Q9BR76	CORO1B	-0.457595	0.186721
O94973;O95782	AP2A2;AP2A1	-0.580088	0.186775
P25787	PSMA2	-0.13873	0.187657
Q86YN6	PPARGC1B	0.349107	0.187704
Q9BSL1	UBAC1	0.296044	0.187733
P54764	EPHA4	0.235956	0.187819
Q02818	NUCB1	-0.256858	0.18812
Q15904	ATP6AP1	0.25901	0.188854
Q9UK05	GDF2	0.27047	0.189524
P31949	S100A11	-0.293542	0.18957
Q04721	NOTCH2	0.275921	0.189587
Q7Z7G0	ABI3BP	-0.240283	0.189932
Q15848	ADIPOQ	-0.178888	0.190882
P35443	THBS4	0.229836	0.191553
P07339	CTSD	-0.116148	0.19191
P28066	PSMA5	-0.164254	0.192146
P48643	CCT5	0.282685	0.192559
P02730	SLC4A1	-0.264601	0.193093
Q9Y2T3	GDA	-0.217288	0.193583
P16035	TIMP2	0.235009	0.193771
P06702	S100A9	-0.235096	0.194141
O15123	ANGPT2	0.414368	0.19429
P21802	FGFR2	0.313869	0.194478
Q12866	MERTK	-0.20814	0.195185
Q8IV03	LURAP1L	0.296137	0.195834
Q86UP0	CDH24	-0.208184	0.196331
Q96EE4	CCDC126	0.203634	0.196883
O95866	MPIG6B	-0.610843	0.196985
A0A075B6K6	IGLV4-3	0.771413	0.198139
P26572	MGAT1	-0.188147	0.198527
P62873	GNB1	-0.233245	0.199815
O14498	ISLR	0.226666	0.200337
Q9P232	CNTN3	-0.145265	0.200621
P41240	CSK	-0.278857	0.202126
A0A0B4J1Y8	IGLV9-49	-0.314813	0.202477
Q9ULB1	NRXN1	-0.259723	0.202748
P10451	SPP1	0.212074	0.203018
P05186	ALPL	-0.164742	0.203519
Q9Y2T4	PPP2R2C	0.269011	0.205084
Q562R1	ACTBL2	-0.277538	0.205134
Q76LX8	ADAMTS13	-0.204604	0.205767
O00232	PSMD12	0.658022	0.207008
Q9HBI1	PARVB	-0.261931	0.207142
P24158	PRTN3	-0.310034	0.207489
P54753	EPHB3	-0.291469	0.207729
Q5TFQ8	SIRPB1	0.30074	0.208753
P05121	SERPINE1	-0.138487	0.209057
P11684	SCGB1A1	-0.30141	0.209956
P05981	HPN	-0.220289	0.210344
Q9Y570	PPME1	0.296396	0.210541
Q9NTN9	SEMA4G	-0.253136	0.211113
Q9ULI4	KIF26A	0.613795	0.211182
P07451	CA3	-0.182922	0.211311
P01903	HLA-DRA	-0.382823	0.21156
P20062	TCN2	-0.211583	0.21168
Q8IUI8	CRLF3	0.580882	0.211973
Q9BXR6	CFHR5	-0.153594	0.213812
Q96C24	SYTL4	-0.545229	0.213956
P06681	C2	-0.174018	0.214926
P13987	CD59	0.24544	0.215392
Q9BRR6	ADPGK	-0.299549	0.215667
Q5FWF5	ESCO1	-0.256075	0.21571
Q13237	PRKG2	-0.21735	0.215871
Q5T749	KPRP	-0.425052	0.216039
P04003	C4BPA	-0.198028	0.216215
Q02809	PLOD1	0.211594	0.216266
P00505	GOT2	0.274565	0.216983
O95837	GNA14	-0.249525	0.217783
Q96RW7	HMCN1	-0.152861	0.218548
Q6X4W1	NSMF	0.41396	0.218696
O14773	TPP1	0.291284	0.219444
O00584	RNASET2	-0.182816	0.219455
Q96BQ1	FAM3D	0.405969	0.219603
P68871	HBB	-0.201722	0.219848
P01040	CSTA	0.27516	0.220027
P26639	TARS1	-0.42608	0.220085
P28161	GSTM2	-0.251814	0.220639
P06744	GPI	-0.176602	0.222084
A0A075B6R9;A0A0C4DH68	IGKV2D-24;IGKV2-24	-0.0728987	0.222371
P09326	CD48	0.237912	0.222631
B2RN74;Q8NG94;Q8NH07	OR11H12;OR11H1;OR11H2	-0.283399	0.22308
O00391	QSOX1	0.201377	0.223137
Q14914	PTGR1	-0.260268	0.2235
Q9H4G4	GLIPR2	0.187518	0.223644
P24534	EEF1B2	-0.289286	0.225245
P02144	MB	0.15034	0.226815
P32004	L1CAM	-0.135101	0.228122
P07307	ASGR2	0.159492	0.228408
O00151	PDLIM1	-0.231019	0.228631
P48723	HSPA13	-0.152156	0.228779
Q9UEE5	STK17A	0.197712	0.228865
P61328	FGF12	-0.344573	0.22955
Q92800	EZH1	-0.685926	0.230085
P69891	HBG1	-0.199321	0.230252
O75023	LILRB5	-0.0925702	0.23084
P01780	IGHV3-7	-0.0968724	0.231393
A0A075B6S6;P06310	IGKV2D-30;IGKV2-30	0.522674	0.231824
P61160	ACTR2	-0.223251	0.232234
Q6GTS8	PM20D1	-0.104601	0.233319
O95479	H6PD	-0.0947427	0.234323
P08473	MME	-0.235957	0.234521
Q6WN34	CHRDL2	-0.41744	0.234733
Q9HC56	PCDH9	0.183787	0.236651
Q99715	COL12A1	0.210585	0.238368
P09603	CSF1	-0.22821	0.239311
Q86UX7	FERMT3	-0.237931	0.239642
Q86U17	SERPINA11	0.139042	0.240106
P37802	TAGLN2	-0.231891	0.240329
Q09328	MGAT5	-0.188477	0.240329
P15144	ANPEP	-0.158744	0.242849
P34913	EPHX2	-0.248596	0.242966
Q14435	GALNT3	-0.189939	0.243206
O14818	PSMA7	-0.125925	0.243998
P02042	HBD	-0.195477	0.244637
Q13576	IQGAP2	0.282377	0.244713
Q12805	EFEMP1	0.168396	0.244811
Q12913	PTPRJ	-0.230734	0.245098
P26022	PTX3	0.1935	0.245574
P36897	TGFBR1	0.206373	0.24599
Q03591	CFHR1	-0.144071	0.246515
P05164	MPO	-0.127876	0.247134
Q9NTU7	CBLN4	-0.128441	0.247423
O60568	PLOD3	-0.454495	0.247766
Q8N1N4	KRT78	0.31698	0.24814
P48739	PITPNB	0.238304	0.248849
Q9H2E6	SEMA6A	-0.214487	0.249388
Q9UNW1	MINPP1	-0.217601	0.250029
Q9BZQ8	NIBAN1	-0.392582	0.250634
P00736	C1R	-0.223703	0.251359
Q99542	MMP19	0.201114	0.253099
P07954	FH	0.27738	0.254142
Q92876	KLK6	0.145913	0.254508
O43790	KRT86	-0.343535	0.25511
O00487	PSMD14	0.322454	0.255528
P19320	VCAM1	0.131479	0.256785
P07737	PFN1	-0.224145	0.257339
P12104	FABP2	0.192822	0.257463
P40925	MDH1	-0.214983	0.258196
Q9NPH3	IL1RAP	0.0890638	0.258279
Q10469	MGAT2	-0.17195	0.25891
P35030	PRSS3	0.217397	0.259826
P04271	S100B	0.352164	0.259907
P20810	CAST	0.240799	0.260963
Q9H257	CARD9	-0.180764	0.261046
P24821	TNC	0.144448	0.261897
Q13177	PAK2	0.181553	0.263537
Q07954	LRP1	-0.169577	0.263616
P05543	SERPINA7	-0.0349068	0.263967
Q9Y2G1	MYRF	0.268932	0.264317
P04180	LCAT	-0.16967	0.266071
Q3ZCW2	LGALSL	-0.226533	0.266124
P34130	NTF4	0.255016	0.26729
O00115	DNASE2	0.222936	0.267304
O94985	CLSTN1	0.154586	0.267386
P05060	CHGB	0.202921	0.269035
P21810	BGN	0.230214	0.269431
Q96H79	ZC3HAV1L	-0.227897	0.269608
P59665;P59666	DEFA1;DEFA3	-0.164741	0.27006
Q8NBS9	TXNDC5	-0.186902	0.27032
P55957	BID	-0.335547	0.272597
Q9Y5L0	TNPO3	0.184819	0.274648
P15586	GNS	-0.155841	0.275155
Q96GW7	BCAN	-0.316892	0.27516
P23381	WARS1	-0.196589	0.275466
Q14315	FLNC	0.150612	0.275721
Q86TY3	ARMH4	0.257001	0.2765
P01130	LDLR	-0.108028	0.276945
P61158	ACTR3	-0.217527	0.277126
P19367	HK1	-0.278884	0.277494
Q13790	APOF	-0.11822	0.279101
Q12797	ASPH	0.237875	0.279393
O00154	ACOT7	-0.237981	0.279794
Q2KHT3	CLEC16A	-0.207362	0.280457
Q6ICC9	RTL6	-0.580243	0.28145
O95747	OXSR1	-0.195364	0.281537
P01814	IGHV2-70	0.162272	0.282304
P61224	RAP1B	-0.197062	0.28268
Q13510	ASAH1	-0.239812	0.282843
Q9ULD8	KCNH3	0.221531	0.282992
Q9H9K5	ERVMER34-1	0.176258	0.283195
P21291	CSRP1	-0.223732	0.284242
P08779	KRT16	0.249726	0.285946
P07384	CAPN1	-0.198336	0.286294
Q5D862	FLG2	0.259525	0.287143
Q99829	CPNE1	0.347105	0.287289
Q15828	CST6	0.154568	0.287625
P04156	PRNP	-0.212326	0.287697
P21333	FLNA	-0.203895	0.289096
P67936	TPM4	-0.211857	0.289429
P36507	MAP2K2	0.296373	0.28966
P20061	TCN1	0.125056	0.290501
Q14651	PLS1	-0.2093	0.290957
P61026	RAB10	-0.199837	0.290984
Q13201	MMRN1	0.178212	0.291307
Q13418	ILK	-0.215762	0.291664
Q9NVA2	SEPTIN11	0.30836	0.292151
O75339	CILP	0.159888	0.292184
P58166	INHBE	-0.143741	0.292324
Q9BYJ0	FGFBP2	-0.145943	0.292402
P04090	RLN2	0.256028	0.292809
O75969	AKAP3	0.283329	0.293243
Q01581	HMGCS1	0.279366	0.293389
A0A075B6K5	IGLV3-9	-0.157721	0.29437
Q9H299	SH3BGRL3	-0.201038	0.294656
Q9Y6N6	LAMC3	0.246234	0.29492
P68036	UBE2L3	0.228186	0.294999
Q96KG7	MEGF10	-0.276209	0.295026
Q15404	RSU1	-0.205953	0.295172
Q8NCC3	PLA2G15	-0.139385	0.295363
Q6PGP7	SKIC3	-0.206208	0.296301
P01764;P01768;P0DP03	IGHV3-23;IGHV3-30;IGHV3-30-5	-0.106573	0.297109
P08123	COL1A2	0.149229	0.297573
O15143	ARPC1B	-0.210748	0.298383
P11362	FGFR1	0.172263	0.29861
Q8N8Z6	DCBLD1	0.22071	0.299198
Q15582	TGFBI	0.1363	0.299589
Q969P5	FBXO32	0.313415	0.299709
P60900	PSMA6	-0.152033	0.301211
Q96Q45	TMEM237	-0.19954	0.301473
P24855	DNASE1	-0.130752	0.302397
P00748	F12	-0.140097	0.302909
P27797	CALR	-0.194819	0.303304
P12931	SRC	-0.191306	0.305193
P16152	CBR1	-0.184069	0.305667
Q8TD06	AGR3	-0.167316	0.305803
Q9NY65	TUBA8	-0.282342	0.306457
Q0ZGT2	NEXN	0.227514	0.306527
Q13616	CUL1	0.24111	0.30675
Q96AP7	ESAM	0.165571	0.307916
Q05682	CALD1	-0.197274	0.308948
P05019	IGF1	0.223456	0.309135
Q9H609	ZNF576	-0.222411	0.309204
Q96A49	SYAP1	0.177617	0.309775
Q5SYB0	FRMPD1	0.186957	0.310334
P06865	HEXA	-0.114924	0.31061
Q92496	CFHR4	-0.127705	0.310682
P61457	PCBD1	-0.233877	0.310794
P22392	NME2	0.234512	0.311457
Q6UWY5	OLFML1	-0.276594	0.311605
P78344	EIF4G2	0.387025	0.313989
O43915	VEGFD	0.245979	0.314487
Q14624	ITIH4	-0.12298	0.314678
Q92692	NECTIN2	-0.209446	0.314935
O00602	FCN1	0.165326	0.315146
P22748	CA4	0.204666	0.315205
Q14956	GPNMB	0.129755	0.315395
Q15746	MYLK	-0.19122	0.316602
P42025;P61163	ACTR1B;ACTR1A	0.317019	0.317053
P12110	COL6A2	0.160091	0.317294
Q08ET2	SIGLEC14	-0.100767	0.317506
O43707	ACTN4	-0.192266	0.317944
P14151	SELL	-0.118435	0.318281
P15529	CD46	0.194127	0.318543
Q9GZN8	ADISSP	-0.201604	0.31859
P17813	ENG	0.175432	0.320146
Q16853	AOC3	-0.123162	0.321155
P22413	ENPP1	-0.190019	0.321373
P09960	LTA4H	-0.0615924	0.322428
Q9UKU9	ANGPTL2	0.21653	0.32286
P26885	FKBP2	-0.200823	0.324138
O75531	BANF1	-0.26708	0.325148
Q14112	NID2	0.189686	0.326224
Q7Z7M9	GALNT5	0.137275	0.326505
P10586	PTPRF	-0.119429	0.326718
P29350	PTPN6	-0.187666	0.326867
P51452	DUSP3	0.227577	0.326909
Q8NEM7	SUPT20H	0.0740247	0.32805
O60844	ZG16	0.150172	0.330576
Q8N392	ARHGAP18	0.202834	0.33069
Q9H2X9;Q9UHW9;Q9UP95	SLC12A5;SLC12A6;SLC12A4	0.209257	0.332135
O95373	IPO7	0.299108	0.332729
P04264	KRT1	0.204361	0.333573
Q8NI99	ANGPTL6	0.0918102	0.333743
P30101	PDIA3	-0.132298	0.334537
P25311	AZGP1	0.139371	0.334559
Q68CP9	ARID2	-0.257425	0.334596
O43280	TREH	-0.0708453	0.3349
P23471	PTPRZ1	-0.129733	0.335332
P27487	DPP4	-0.108879	0.335705
P54920	NAPA	0.32326	0.336647
P11597	CETP	-0.10081	0.336669
P02810	PRH1	-0.196754	0.337802
P16870	CPE	0.216254	0.338263
P60891	PRPS1	-0.218714	0.338716
P00740	F9	-0.160099	0.338792
Q13200	PSMD2	-0.256646	0.338982
P63104	YWHAZ	-0.183467	0.33906
Q9UBW5	BIN2	0.196648	0.339702
P23528	CFL1	-0.185457	0.33996
P80748	IGLV3-21	0.168356	0.340188
P01011	SERPINA3	0.139962	0.341144
P00492	HPRT1	-0.166213	0.341473
A0A087WSX0	IGLV5-45	-0.169388	0.342368
P54296	MYOM2	0.192293	0.343392
Q8N6M5	ALLC	-0.206993	0.344016
P20618	PSMB1	-0.149396	0.346561
O00299	CLIC1	-0.178393	0.347647
P36888	FLT3	-0.175907	0.347854
P98066	TNFAIP6	-0.169429	0.348127
Q9GZY0	NXF2	0.247345	0.348445
P42574	CASP3	0.251129	0.349661
P52888	THOP1	0.191854	0.349671
Q9UBX5	FBLN5	0.187255	0.350882
Q13075	NAIP	-0.153121	0.353085
P54289	CACNA2D1	-0.0768805	0.354015
A0A0J9YXX1	IGHV5-10-1	-0.0641729	0.354061
P15289	ARSA	-0.149976	0.354273
Q8WYK0	ACOT12	-0.161166	0.354502
O75223	GGCT	0.209982	0.355331
P04196	HRG	0.0946434	0.35586
P49915	GMPS	-0.16218	0.357182
P13611	VCAN	-0.181211	0.357754
Q9NS84	CHST7	-0.136752	0.3581
P52566	ARHGDIB	-0.17569	0.358185
Q8NFY4	SEMA6D	-0.205419	0.358715
Q8IWV2	CNTN4	0.112629	0.359521
P55268	LAMB2	0.156131	0.359623
Q53RD9	FBLN7	-0.145467	0.359862
P03971	AMH	-0.122937	0.360123
P09488;P46439;Q03013	GSTM1;GSTM5;GSTM4	0.31435	0.362956
O95025	SEMA3D	-0.733334	0.362973
Q5TDH0	DDI2	-0.179688	0.363116
Q9H0R4	HDHD2	-0.206296	0.364261
Q96C23	GALM	-0.219518	0.364366
P05187;P09923;P10696	ALPP;ALPI;ALPG	-0.284167	0.365534
Q9UKV8	AGO2	0.271882	0.365906
Q9NZK5	ADA2	-0.0766764	0.366158
P01593;P01594	IGKV1D-33;IGKV1-33	0.23135	0.366784
P27824	CANX	-0.126879	0.366895
B2RNN3;P0C862	C1QTNF9B;C1QTNF9	-0.129734	0.36706
P07333	CSF1R	-0.104058	0.367324
P49593	PPM1F	0.218399	0.368231
P35611	ADD1	-0.320058	0.369063
Q9NQ38	SPINK5	0.146381	0.369176
P00995	SPINK1	0.20415	0.370969
P26038	MSN	-0.158091	0.371644
P12814	ACTN1	-0.17126	0.372017
Q5VY43	PEAR1	0.182796	0.372147
Q9Y3I1	FBXO7	-0.238387	0.372365
P29323	EPHB2	-0.23229	0.372481
Q14766	LTBP1	0.151669	0.372661
O00451	GFRA2	-0.171051	0.373199
Q9BZF2	OSBPL7	0.172187	0.37408
Q5ZPR3	CD276	-0.184639	0.374236
Q9NQ79	CRTAC1	0.07068	0.375202
P14207	FOLR2	-0.153774	0.375464
P10646	TFPI	0.127339	0.377136
P52758	RIDA	0.248676	0.377717
P31946	YWHAB	-0.162489	0.377983
Q16674	MIA	-0.157117	0.378397
P05546	SERPIND1	-0.119128	0.379649
P07602	PSAP	-0.11941	0.380259
Q8IXP5	POU2AF2	0.169767	0.380394
Q06828	FMOD	-0.177818	0.380942
Q9NQ76	MEPE	0.155882	0.381123
Q8IY22	CMIP	0.166684	0.381587
Q9H4B0	OSGEPL1	0.131058	0.381682
O00468	AGRN	-0.111593	0.381738
Q6P988	NOTUM	-0.185243	0.38241
P09619	PDGFRB	0.0823331	0.382761
P59998	ARPC4	-0.167982	0.383221
P04792	HSPB1	-0.22304	0.383767
O95336	PGLS	-0.168119	0.383817
Q9NR99	MXRA5	-0.150245	0.384798
Q6UXH0	ANGPTL8	0.134268	0.384887
Q92598	HSPH1	-0.14676	0.385351
P05413	FABP3	-0.148952	0.387876
P01706	IGLV2-11	-0.210602	0.387963
Q7L014	DDX46	0.171884	0.389103
Q92530	PSMF1	0.199131	0.389308
Q9UNZ2	NSFL1C	0.189156	0.390206
P35475	IDUA	-0.22404	0.390332
Q7Z7M0	MEGF8	0.121267	0.390368
P07093	SERPINE2	0.170068	0.390536
P10153	RNASE2	0.15716	0.391133
P08397	HMBS	0.189799	0.39177
Q96NB1	CEP20	-0.202243	0.391884
O95989	NUDT3	0.331171	0.392781
P13693	TPT1	-0.197889	0.39309
A0A0C4DH29	IGHV1-3	-0.095872	0.393965
A2AJT9	BCLAF3	0.203797	0.394227
O60279	SUSD5	0.132875	0.394447
P31948	STIP1	-0.18316	0.394513
P06576	ATP5F1B	0.41895	0.394843
P60660	MYL6	-0.163615	0.395174
P04908;P0C0S5;P0C0S8;P16104;P20671;Q16777;Q6FI13;Q71UI9;Q7L7L0;Q8IUE6;Q93077;Q96KK5;Q96QV6;Q99878;Q9BTM1	H2AC4;H2AZ1;H2AC11;H2AX;H2AC7;H2AC20;H2AC18;H2AZ2;H2AC25;H2AC21;H2AC6;H2AC12;H2AC1;H2AC14;H2AJ	-0.321141	0.395307
P36980	CFHR2	-0.11004	0.395571
P53804	TTC3	-0.0867562	0.399101
O43493	TGOLN2	0.145751	0.399691
P01034	CST3	0.129	0.399764
P54725	RAD23A	0.179644	0.400306
P40763	STAT3	-0.37187	0.401165
Q13045	FLII	0.617649	0.401633
P61106	RAB14	-0.287938	0.401683
P28074	PSMB5	-0.131704	0.401853
P23284	PPIB	-0.154761	0.402332
Q00610	CLTC	-0.163321	0.402396
P15924	DSP	0.170252	0.40324
Q7Z5L0	VMO1	0.0916104	0.404453
P22102	GART	0.342999	0.404566
O14618	CCS	-0.17789	0.404652
Q9P2M7	CGN	-0.167124	0.404859
P46531	NOTCH1	-0.180398	0.405039
P55899	FCGRT	0.152402	0.405064
P20023	CR2	-0.0927265	0.405522
P01859	IGHG2	-0.120655	0.405938
Q8WUA8	TSKU	-0.164563	0.406613
O15144	ARPC2	-0.164678	0.406673
Q7Z6M3	MILR1	-0.227648	0.407181
P17936	IGFBP3	0.116738	0.40758
Q9ULV4	CORO1C	-0.175139	0.408204
Q13228	SELENBP1	-0.140708	0.408587
P52907	CAPZA1	-0.177524	0.409246
O00139	KIF2A	0.273068	0.410441
P40967	PMEL	-0.132104	0.410455
Q9ULD5	ZNF777	-0.504031	0.411609
A0A0C4DH35	IGHV3-35	0.311285	0.41196
P55083	MFAP4	0.101932	0.41253
P17900	GM2A	0.164374	0.412845
Q9UBP4	DKK3	0.18002	0.41317
P25054	APC	-0.137115	0.413734
Q16610	ECM1	0.123249	0.414914
Q86YZ3	HRNR	0.194872	0.416589
Q9NSC7	ST6GALNAC1	-0.0545632	0.416688
P35052	GPC1	-0.175324	0.416959
Q6P179	ERAP2	-0.0288752	0.417562
Q5VSL9	STRIP1	0.146174	0.418019
Q86V21	AACS	-0.220977	0.418023
Q6ZRP7	QSOX2	-0.0762535	0.418253
Q96MK3	FAM20A	-0.131802	0.418695
P20851	C4BPB	-0.143321	0.42016
O75144	ICOSLG	-0.121304	0.420319
P07358	C8B	-0.11227	0.420539
O14950;P19105	MYL12B;MYL12A	0.194713	0.420738
P08709	F7	-0.0984791	0.421281
P20827	EFNA1	0.229667	0.423188
P01042	KNG1	-0.13494	0.42353
Q96FG2	ELMOD3	0.168526	0.423656
Q12841	FSTL1	0.169555	0.424426
P35916	FLT4	-0.0793233	0.425097
Q86UD1	OAF	0.133811	0.425466
P98187	CYP4F8	0.353941	0.42599
P08134;P61586	RHOC;RHOA	0.299742	0.426344
P04920	SLC4A2	0.4197	0.427359
P45877	PPIC	-0.142723	0.427387
P17655	CAPN2	0.116605	0.427931
P31150	GDI1	-0.150178	0.427955
A8MUM7	LGALS16	0.418583	0.428259
P50748	KNTC1	-0.145781	0.429147
Q02487	DSC2	0.137337	0.429408
Q99436	PSMB7	-0.108763	0.43002
P78371	CCT2	-0.191532	0.430246
P02746	C1QB	0.11681	0.430505
P14923	JUP	0.161943	0.432028
P10645	CHGA	0.125273	0.432235
Q5VTT5	MYOM3	0.11699	0.432873
Q6YHK3	CD109	-0.0751623	0.432977
Q15102	PAFAH1B3	-0.160401	0.432999
P68402	PAFAH1B2	-0.18822	0.433035
O15204	ADAMDEC1	0.11088	0.433076
Q9UKX2	MYH2	0.189092	0.4332
P49189	ALDH9A1	-0.167621	0.433494
Q9NQS7	INCENP	0.0788373	0.434085
O00505;O00629	KPNA3;KPNA4	-0.897938	0.434261
Q5VU43	PDE4DIP	-0.157664	0.434825
P27169	PON1	-0.0810211	0.434826
P98172	EFNB1	0.182779	0.434904
P43487	RANBP1	0.16299	0.435023
Q93096	PTP4A1	0.174778	0.436142
P22105	TNXB	0.132992	0.436193
O75083	WDR1	-0.149529	0.436272
P40197	GP5	0.110301	0.436338
Q14574	DSC3	0.109725	0.437232
Q8WW52	FAM151A	-0.0983566	0.437257
Q9HCK0	ZBTB26	0.127659	0.437356
P00367	GLUD1	0.123357	0.437363
Q13822	ENPP2	0.0990787	0.437428
O15079;Q9NX95	SNPH;SYBU	-0.154387	0.437573
P08590	MYL3	-0.21618	0.43848
O43488	AKR7A2	-0.167802	0.438647
Q15833	STXBP2	0.234137	0.43922
P12259	F5	-0.119665	0.439242
Q8NEZ4	KMT2C	-0.144371	0.439919
Q15843	NEDD8	0.186096	0.440498
O76054	SEC14L2	-0.144453	0.441028
P13797	PLS3	0.124958	0.441646
P59020	DSCR9	0.288999	0.441952
P01031	C5	-0.139351	0.442028
Q8TDQ7	GNPDA2	0.171047	0.443095
Q86Y13	DZIP3	0.144318	0.443417
Q96F85	CNRIP1	0.218321	0.443754
P55103	INHBC	-0.101658	0.443781
O75015	FCGR3B	0.0960619	0.444233
P0DP23;P0DP24;P0DP25	CALM1;CALM2;CALM3	-0.149341	0.445104
P07711	CTSL	-0.134133	0.445255
Q8NBJ4	GOLM1	-0.106396	0.44621
P61970	NUTF2	-0.160825	0.450216
P49588	AARS1	0.232585	0.450241
O00560	SDCBP	-0.166412	0.450394
Q99574	SERPINI1	0.14785	0.450614
P48637	GSS	-0.12946	0.450973
P14550	AKR1A1	0.139882	0.450996
A6NMZ7	COL6A6	-0.177825	0.451382
P22061	PCMT1	-0.149426	0.451519
O15315	RAD51B	-0.155087	0.451656
Q16825	PTPN21	-0.242619	0.452055
Q15166	PON3	-0.0820079	0.452069
O75077	ADAM23	-0.19426	0.452365
Q9UQ52	CNTN6	-0.149672	0.452388
P08922	ROS1	0.163136	0.454091
Q14517	FAT1	-0.0626978	0.455517
Q13404	UBE2V1	-0.160957	0.455632
C9JLR9	ZFTA	0.195909	0.456045
P01860	IGHG3	-0.0602863	0.456086
P29966	MARCKS	-0.128805	0.456206
P60842	EIF4A1	-0.153698	0.456232
O75976	CPD	0.116091	0.456403
P30153	PPP2R1A	0.146749	0.457904
P08311	CTSG	-0.105002	0.458432
Q13813	SPTAN1	-0.266869	0.459446
Q14749	GNMT	-0.213529	0.459535
P59910	DNAJB13	-0.142535	0.460522
Q16787	LAMA3	-0.136529	0.461842
P02452	COL1A1	-0.115062	0.461936
P27348	YWHAQ	-0.144235	0.463613
Q92859	NEO1	-0.0965644	0.465435
P06312	IGKV4-1	-0.056404	0.466646
Q07960	ARHGAP1	-0.103797	0.46669
P29144	TPP2	0.156569	0.467259
Q9BWP8	COLEC11	0.0791569	0.469071
Q86WI1	PKHD1L1	0.0521282	0.470057
Q13740	ALCAM	0.126835	0.470728
P06737	PYGL	-0.121293	0.471559
P08697	SERPINF2	-0.105226	0.471944
Q8IWK6	ADGRA3	0.10859	0.472609
Q9UKC9	FBXL2	0.263342	0.472929
Q96DU9	PABPC5	-0.120032	0.473313
P01019	AGT	0.0948073	0.473448
Q6EMK4	VASN	0.135119	0.473941
P28065	PSMB9	-0.117819	0.473965
Q8N3T6	TMEM132C	0.120175	0.474167
P42229;P51692	STAT5A;STAT5B	0.195508	0.475442
P19013	KRT4	0.284144	0.476655
Q93091	RNASE6	-0.213492	0.476753
P11021	HSPA5	-0.101646	0.476981
Q92854	SEMA4D	0.151813	0.477351
P23083	IGHV1-2	-0.078058	0.477604
O60240	PLIN1	0.269179	0.477822
O95393	BMP10	0.20227	0.477935
Q9H8J5	MANSC1	0.107495	0.478072
P05154	SERPINA5	0.106554	0.479115
Q8IYS5	OSCAR	-0.101489	0.479431
P06280	GLA	-0.153899	0.479462
Q6WRI0	IGSF10	-0.261281	0.479886
Q9UJJ9	GNPTG	0.122907	0.480663
Q16555	DPYSL2	-0.148289	0.481006
Q96NZ9	PRAP1	-0.0860419	0.482635
P01893	HLA-H	0.133104	0.48292
P22692	IGFBP4	-0.149073	0.483656
P39060	COL18A1	0.0890174	0.483691
Q86UN2	RTN4RL1	-0.17612	0.483834
P24593	IGFBP5	-0.133592	0.483909
P05107	ITGB2	-0.0979084	0.483918
Q01082	SPTBN1	0.230926	0.484009
Q9GZT8	NIF3L1	0.0610972	0.484107
P30990	NTS	0.114191	0.486816
P04080	CSTB	-0.0923229	0.487352
O43665	RGS10	0.153034	0.48792
Q9Y646	CPQ	0.097865	0.488076
P07911	UMOD	0.0524667	0.491298
P50897	PPT1	-0.189673	0.49166
P07686	HEXB	-0.0604043	0.491698
Q12905	ILF2	-0.150951	0.492048
P21549	AGXT	-0.136505	0.492978
P01700	IGLV1-47	-0.0878255	0.493551
P39059	COL15A1	0.125232	0.494535
Q659A1	ICE2	0.166551	0.496314
P25815	S100P	0.111209	0.496588
P16671	CD36	-0.155808	0.497325
Q8IUL8	CILP2	-0.0789537	0.498081
Q08043	ACTN3	0.140963	0.498963
P05120	SERPINB2	-0.179413	0.499417
Q9NZN3	EHD3	-0.12475	0.499771
Q6ZVX7	NCCRP1	-0.278001	0.500064
Q8IYS0	GRAMD1C	-0.133035	0.500355
Q9H1H9	KIF13A	0.175032	0.500791
Q8WV24	PHLDA1	-0.193423	0.500816
P50552	VASP	-0.125271	0.500897
P62714;P67775	PPP2CB;PPP2CA	-0.177291	0.501037
P22303	ACHE	-0.0900275	0.501535
P52849	NDST2	0.166714	0.501587
A6NKT7;O14715;P0DJD0;P0DJD1;P49792;Q7Z3J3;Q99666	RGPD3;RGPD8;RGPD1;RGPD2;RANBP2;RGPD4;RGPD5	0.300461	0.501753
P35318	ADM	0.166371	0.50186
P00813	ADA	0.164905	0.502604
Q8IYJ1	CPNE9	0.117868	0.502801
P01714	IGLV3-19	-0.0783321	0.502882
Q9UQP3	TNN	-0.100596	0.503018
P03950	ANG	-0.124781	0.503697
P50895	BCAM	-0.110101	0.503724
O00233	PSMD9	0.164985	0.504182
P20701	ITGAL	-0.106819	0.505316
P48507	GCLM	-0.148947	0.505361
Q92820	GGH	-0.0799902	0.506355
Q01538	MYT1	0.14401	0.50836
P08519	LPA	-0.106299	0.509871
P13591	NCAM1	-0.0978216	0.509959
Q86SF2	GALNT7	-0.0976804	0.510177
P09467	FBP1	-0.107614	0.511133
P19021	PAM	0.115584	0.511399
Q15043	SLC39A14	-0.141861	0.511536
Q92626	PXDN	-0.115834	0.511897
A0A0C4DH43	IGHV2-70D	0.157865	0.512464
O15417	TNRC18	0.137726	0.512827
Q9BXJ4	C1QTNF3	0.0883186	0.513461
P04406	GAPDH	-0.116204	0.513782
Q14019	COTL1	-0.130338	0.513851
P35968	KDR	-0.101242	0.513866
Q9HBB8	CDHR5	-0.0959602	0.514081
O15145	ARPC3	-0.129504	0.515093
P11142	HSPA8	-0.126548	0.517485
Q12906	ILF3	0.217628	0.517509
Q9P121	NTM	-0.110831	0.517642
P54922	ADPRH	0.336985	0.518121
P23470	PTPRG	0.104532	0.518736
Q8TD84	DSCAML1	0.19008	0.519007
P80108	GPLD1	-0.0753084	0.519054
Q8IZ83	ALDH16A1	-0.265201	0.519635
Q15382	RHEB	0.57279	0.520005
P18433	PTPRA	-0.228105	0.520643
Q08188	TGM3	0.246985	0.521029
P11117	ACP2	0.274915	0.521068
P47929	LGALS7	0.191602	0.521098
Q13153	PAK1	0.145558	0.52118
P23229	ITGA6	-0.122405	0.521286
Q01469	FABP5	0.130404	0.522225
Q9BS40	LXN	0.125091	0.523059
Q02742	GCNT1	0.155146	0.523139
P05155	SERPING1	-0.0899732	0.523496
P20036	HLA-DPA1	0.287987	0.524473
Q9NYU2	UGGT1	0.0930025	0.525813
P08571	CD14	-0.108725	0.526726
Q9NRN5	OLFML3	0.121139	0.527109
Q9UPV7	PHF24	-0.130392	0.52716
P47756	CAPZB	-0.115353	0.527444
P62328	TMSB4X	-0.119018	0.527499
Q13231	CHIT1	0.0600986	0.527819
P0DOX2		-0.0776951	0.528157
O43633	CHMP2A	0.344047	0.528183
Q93088	BHMT	-0.0914781	0.528355
P08758	ANXA5	-0.112779	0.529251
Q96IU4	ABHD14B	-0.139151	0.529284
P01732	CD8A	-0.163761	0.52942
P02790	HPX	0.0947035	0.529535
Q14563	SEMA3A	-0.122034	0.529844
Q76M96	CCDC80	0.128825	0.531662
P19823	ITIH2	0.0824308	0.53229
Q9UL46	PSME2	-0.114366	0.532465
P61088;Q5JXB2	UBE2N;UBE2NL	-0.123839	0.533416
P61960	UFM1	-0.147088	0.534745
Q15397	PUM3	-0.0777018	0.535417
P13671	C6	-0.107478	0.535774
Q14847	LASP1	-0.127	0.536509
P07357	C8A	-0.100031	0.537475
P49720	PSMB3	-0.0787036	0.53795
Q0VAF6	SYCN	0.114038	0.538023
Q15303	ERBB4	-0.129878	0.539194
O15031	PLXNB2	-0.0713112	0.539604
P52848	NDST1	0.115135	0.539732
Q9UK55	SERPINA10	-0.0690884	0.540107
P62826	RAN	-0.120676	0.540334
P00558	PGK1	-0.122753	0.54095
O60449	LY75	0.146457	0.541158
Q86YD3	TMEM25	0.114888	0.541605
P07237	P4HB	-0.116318	0.541684
P0DOX3		-0.0743468	0.542457
Q14520	HABP2	-0.103522	0.542747
P05160	F13B	-0.111023	0.543227
P51665	PSMD7	0.254392	0.544678
P78504	JAG1	0.116304	0.544756
P20073	ANXA7	-0.164113	0.54497
P01715	IGLV3-1	-0.116221	0.545092
P28482	MAPK1	-0.184953	0.545602
Q13797	ITGA9	0.124738	0.545603
Q07075	ENPEP	-0.0759847	0.545674
P60709	ACTB	-0.115324	0.546199
P19961	AMY2B	0.0599467	0.546797
P42224	STAT1	0.560314	0.547798
A0A0A0MT36	IGKV6D-21	0.113208	0.548965
P15151	PVR	-0.115172	0.5502
P25098;P35626	GRK2;GRK3	0.19097	0.550239
Q9UGM5	FETUB	-0.0793135	0.550658
P22352	GPX3	0.0821076	0.551188
P01236	PRL	-0.127602	0.551618
Q8TER0	SNED1	0.100341	0.553239
Q9Y5Y7	LYVE1	0.10217	0.553346
P98095	FBLN2	-0.103825	0.553732
Q6UXB8	PI16	0.0796581	0.554259
Q9BWD1	ACAT2	-0.124182	0.555303
O95865	DDAH2	0.174834	0.555321
P0DOY2;P0DOY3	IGLC2;IGLC3	-0.0638075	0.555709
Q8IZS8	CACNA2D3	-0.152341	0.555757
Q5TZA2	CROCC	-0.101714	0.557106
P22897	MRC1	-0.0554271	0.558553
P12429	ANXA3	0.104364	0.558969
P80511	S100A12	-0.10801	0.559724
A0AVT1	UBA6	0.336309	0.561234
Q8TE73	DNAH5	-0.0856037	0.561362
Q96N76	UROC1	-0.106347	0.561794
P08185	SERPINA6	0.0776398	0.562058
Q96FE7	PIK3IP1	0.111926	0.56221
Q6E0U4	DMKN	0.0894129	0.562404
Q8IWA6	CCDC60	-0.16739	0.563894
P02751	FN1	0.120305	0.565222
P04066	FUCA1	-0.020206	0.565378
P21709	EPHA1	-0.0855202	0.565508
P55287	CDH11	0.0858862	0.565606
Q9HBW9	ADGRL4	0.0477279	0.565744
Q99832	CCT7	0.188516	0.565977
O00339	MATN2	0.109656	0.566072
Q8WZ42	TTN	0.0790391	0.56707
Q00013	MPP1	-0.128216	0.567951
Q8IYM9	TRIM22	-0.111454	0.568095
Q9Y5C1	ANGPTL3	-0.0824639	0.56849
P14543	NID1	-0.0918581	0.568918
P20702	ITGAX	-0.14905	0.569876
P09093	CELA3A	-0.118076	0.571309
Q7Z5L7	PODN	-0.117626	0.571533
Q6IEE7	TMEM132E	-0.12934	0.572025
P37235	HPCAL1	0.122148	0.573479
Q9H6X2	ANTXR1	-0.0898721	0.57488
P18669	PGAM1	0.0986712	0.575704
Q8N386	LRRC25	-0.0923299	0.57622
P09622	DLD	0.0949256	0.576966
Q16270	IGFBP7	0.108608	0.57715
P16278	GLB1	0.0845984	0.577603
Q13308	PTK7	-0.0915342	0.578393
O00429	DNM1L	-0.105177	0.578612
P01705	IGLV2-23	-0.142925	0.578895
P68104;Q5VTE0	EEF1A1;EEF1A1P5	0.122639	0.579013
Q16651	PRSS8	-0.0811724	0.579511
Q4G148	GXYLT1	-0.0636367	0.579905
P61981	YWHAG	-0.0971507	0.580134
P07738	BPGM	-0.100915	0.581072
Q969I3	GLYATL1	0.366799	0.581771
Q7LGC8	CHST3	0.109247	0.581835
Q9BY76	ANGPTL4	0.105475	0.582378
A0A075B6H7;A0A0C4DH55;P01624	IGKV3-7;IGKV3D-7;IGKV3-15	-0.0437085	0.583271
P16070	CD44	0.0883986	0.583345
P26927	MST1	-0.0522178	0.583537
Q13555	CAMK2G	0.10269	0.584486
P18850	ATF6	0.0809372	0.585674
P51884	LUM	0.0864111	0.586185
Q8NBJ7	SUMF2	-0.0962631	0.587406
Q9Y696	CLIC4	0.102161	0.588388
Q01973	ROR1	-0.0910648	0.589671
O15511	ARPC5	-0.105811	0.591785
P30048	PRDX3	0.112689	0.592037
Q9H1B5	XYLT2	-0.116711	0.592106
Q16627	CCL14	0.114971	0.592396
Q9BXS5;Q9Y6Q5	AP1M1;AP1M2	0.211161	0.592564
Q5VW36	FOCAD	0.0713918	0.592705
Q96HC4	PDLIM5	0.116863	0.592777
P01871	IGHM	-0.051295	0.593017
P05451	REG1A	0.0654559	0.593018
O00587;P80365	MFNG;HSD11B2	0.110032	0.593926
P05387	RPLP2	0.104679	0.594349
Q16706	MAN2A1	-0.0630206	0.594486
P41226	UBA7	0.151419	0.598127
Q13421	MSLN	0.0506189	0.598933
Q14644	RASA3	-0.187187	0.600042
P00568	AK1	-0.102897	0.600148
A0A0B4J1V6	IGHV3-73	0.0776616	0.601157
P16234	PDGFRA	-0.098385	0.601762
P50502;Q8IZP2	ST13;ST13P4	-0.102806	0.602331
O75368	SH3BGRL	0.103519	0.602404
Q9Y2E5	MAN2B2	-0.0474082	0.603569
P19827	ITIH1	0.0734281	0.603638
O00329	PIK3CD	0.0902178	0.603969
Q5JS37	NHLRC3	-0.090041	0.604991
P18084	ITGB5	0.181545	0.605293
A0A0C4DH25	IGKV3D-20	-0.0567468	0.605339
P30273	FCER1G	0.136027	0.606136
Q16401	PSMD5	-0.113249	0.606154
Q9NZD4	AHSP	-0.097247	0.60624
Q96EG1	ARSG	0.101609	0.606692
Q96BZ4	PLD4	-0.06228	0.606942
Q99538	LGMN	-0.115952	0.606984
Q6PCB8	EMB	0.178549	0.607246
Q8IZF2	ADGRF5	-0.059558	0.607829
Q9H009	NACA2	0.16617	0.608319
O15394	NCAM2	0.0662311	0.608475
P16284	PECAM1	0.0831779	0.608767
P35858	IGFALS	0.0552295	0.609409
Q01518	CAP1	-0.100929	0.609619
Q9H479	FN3K	0.101916	0.610516
Q9UBC2	EPS15L1	0.113681	0.610676
P14625	HSP90B1	0.0589534	0.611225
P04216	THY1	0.0840791	0.611833
Q86X29	LSR	-0.0785218	0.612401
Q7L9L4;Q9H8S9	MOB1B;MOB1A	-0.108641	0.613153
Q7Z794	KRT77	0.264022	0.614016
Q8N149	LILRA2	-0.0880534	0.614066
P04040	CAT	-0.0934849	0.614123
O95897	OLFM2	-0.0625144	0.614347
P10909	CLU	-0.0852053	0.614773
Q96TA1	NIBAN2	0.109887	0.614909
Q71F78	LCA10	-0.130135	0.615363
P41594	GRM5	-0.0736742	0.61539
Q8IUG5	MYO18B	0.230082	0.615416
Q9Y4E8	USP15	-0.112586	0.616288
O95872	GPANK1	-0.0801	0.618357
P12318	FCGR2A	0.045084	0.618663
Q6P3S6	FBXO42	0.114549	0.618844
Q14213	EBI3	0.082518	0.621305
P18085;P61204;P84077;P84085	ARF4;ARF3;ARF1;ARF5	-0.0937912	0.621668
Q9H008	LHPP	-0.184932	0.622053
Q96H15	TIMD4	-0.113115	0.622352
O43895	XPNPEP2	0.0287314	0.62448
P54727	RAD23B	-0.106024	0.625079
Q9Y4I1	MYO5A	0.107354	0.625357
P49908	SELENOP	-0.0629557	0.625955
P0DOX4		0.0615899	0.625974
P04440	HLA-DPB1	-0.077615	0.626095
Q13232	NME3	-0.0994479	0.626476
Q15149	PLEC	0.0986198	0.627012
O14737	PDCD5	0.118498	0.627253
Q8N3C0	ASCC3	0.137511	0.627407
O76003	GLRX3	0.108175	0.628117
P08833	IGFBP1	-0.0750332	0.629267
Q9H251	CDH23	-0.0617397	0.630907
P0DTE7;P0DTE8;P0DUB6	AMY1B;AMY1C;AMY1A	0.0516107	0.631035
A8MVW5	HEPACAM2	-0.0762632	0.63108
Q9UI42	CPA4	-0.0928504	0.631149
Q6NW40	RGMB	0.121371	0.631184
Q9UIA9	XPO7	0.324642	0.631445
Q5VUB5	FAM171A1	0.109986	0.631758
Q9BUL8	PDCD10	-0.0964499	0.631903
Q10471	GALNT2	-0.0841337	0.632454
Q92797	SYMPK	-0.116847	0.63302
P01817	IGHV2-5	0.0759163	0.633321
P48960	ADGRE5	-0.0723086	0.633433
Q9UKZ9	PCOLCE2	0.0630526	0.634225
P43652	AFM	-0.0631798	0.634321
P0DOX6		0.0272136	0.635305
Q15797;Q99717	SMAD1;SMAD5	-0.110789	0.636135
P04746	AMY2A	0.057042	0.636196
Q7Z3B1	NEGR1	0.0707413	0.636318
P80723	BASP1	-0.0604352	0.636386
P20774	OGN	0.0543931	0.636536
Q9BXY5	CAPS2	0.0683978	0.63663
Q9UFP1	GASK1A	0.0947174	0.637226
O95274	LYPD3	-0.131104	0.637247
Q8N428	GALNT16	0.142927	0.637438
O95428	PAPLN	0.0574762	0.638388
Q8IVW4	CDKL3	-0.0473584	0.638409
P62191	PSMC1	0.106502	0.639632
Q9NSK0	KLC4	0.103938	0.641894
Q07092	COL16A1	0.0805393	0.642413
P49368	CCT3	-0.0964765	0.642417
Q96RD9	FCRL5	-0.0493551	0.642937
Q10588	BST1	0.0329732	0.642958
P61077;P62837	UBE2D3;UBE2D2	-0.155183	0.643156
P51149	RAB7A	-0.0856384	0.643476
Q16658	FSCN1	-0.0975469	0.644076
P32119	PRDX2	-0.095554	0.64428
P63316	TNNC1	-0.159957	0.644691
P60174	TPI1	-0.0972793	0.644957
Q9NUQ9	CYRIB	-0.0921919	0.645246
O75131	CPNE3	-0.158031	0.64545
P01782;P0DP04	IGHV3-9;IGHV3-43D	-0.0400707	0.645657
P02788	LTF	0.0430963	0.645859
O43451	MGAM	-0.0979904	0.646587
Q13449	LSAMP	-0.0903685	0.647015
O76061	STC2	-0.091497	0.647094
P12883	MYH7	-0.0804458	0.647465
O60664	PLIN3	0.0801643	0.647745
P26992	CNTFR	0.0714903	0.648932
Q08334	IL10RB	-0.110095	0.64898
P08861	CELA3B	-0.0759232	0.648997
O94898	LRIG2	0.125491	0.650062
P43355	MAGEA1	0.126951	0.650064
P58546	MTPN	-0.103112	0.650117
Q9Y6Z7	COLEC10	0.067412	0.650232
Q9HC38	GLOD4	-0.0894066	0.650712
P47972	NPTX2	-0.0708632	0.651291
P04439	HLA-A	-0.0367394	0.651468
Q96GD0	PDXP	0.48547	0.653141
P00390	GSR	-0.0805117	0.65429
Q04917	YWHAH	-0.0885682	0.655257
O00241	SIRPB1	0.0851685	0.656081
Q09666	AHNAK	0.0756166	0.656118
P06753	TPM3	-0.0859387	0.656534
A0A075B6S2	IGKV2D-29	-0.0435113	0.656702
P36959	GMPR	-0.0916702	0.657459
O95995	GAS8	0.0931921	0.658198
Q9NRV9	HEBP1	-0.152001	0.658257
P01009	SERPINA1	0.0611066	0.658287
Q15762	CD226	0.099893	0.658963
P69892	HBG2	-0.0729918	0.659166
P49916	LIG3	-0.0972555	0.660048
Q00688	FKBP3	0.098356	0.660589
P60520	GABARAPL2	-0.0917781	0.661139
P07225	PROS1	-0.0742938	0.66292
P38606	ATP6V1A	0.08936	0.663244
P98161	PKD1	0.0720397	0.664311
P08581	MET	0.0531449	0.664617
Q96JW4	SLC41A2	0.109973	0.665701
Q16820	MEP1B	0.0947905	0.667468
Q9Y5Z4	HEBP2	-0.108204	0.669329
O75051	PLXNA2	0.0901974	0.669845
Q99685	MGLL	-0.131177	0.670283
P55157	MTTP	-0.0710568	0.670307
P78324	SIRPA	0.0547924	0.670561
P51693	APLP1	-0.0562106	0.670927
P55854;P61956;Q6EEV6	SUMO3;SUMO2;SUMO4	0.0790351	0.671122
P02647	APOA1	-0.0469151	0.671169
Q92187	ST8SIA4	0.0673912	0.671545
Q8NA70	FAM47B	-0.0883737	0.673483
O75369	FLNB	-0.0879581	0.673509
P19971	TYMP	-0.0721008	0.673609
O95084	PRSS23	0.0916117	0.673688
Q6XQN6	NAPRT	-0.0886079	0.674226
Q99435	NELL2	-0.0602258	0.674934
P37840	SNCA	-0.0793087	0.675025
A0A075B6P5;P01615	IGKV2-28;IGKV2D-28	-0.0522868	0.675349
P09104	ENO2	-0.0776232	0.675507
Q15365	PCBP1	0.0928299	0.675793
P28827	PTPRM	-0.0600847	0.678535
Q8IZT6	ASPM	-0.0631091	0.67898
P07585	DCN	-0.100244	0.679069
Q9NP84	TNFRSF12A	0.135155	0.679451
Q9HCK4	ROBO2	-0.0709534	0.68035
Q14393	GAS6	-0.0795508	0.681034
Q9Y376	CAB39	0.110284	0.681355
P55010	EIF5	-0.13062	0.681387
O00462	MANBA	0.0441714	0.681433
P08238	HSP90AB1	-0.0721466	0.682509
P55786	NPEPPS	-0.0737583	0.682643
O15273	TCAP	-0.125152	0.683633
P62491;Q15907	RAB11A;RAB11B	-0.0719593	0.683722
P36955	SERPINF1	-0.0596528	0.683895
Q9UJ14	GGT7	0.0701688	0.683981
P41222	PTGDS	-0.056755	0.683998
P02745	C1QA	-0.0533934	0.684069
P07478	PRSS2	-0.0428949	0.684484
P62258	YWHAE	-0.0810174	0.684913
P13224	GP1BB	-0.132378	0.684972
O95861	BPNT1	0.0860079	0.685017
P11940	PABPC1	0.0879466	0.686842
Q5VWN6	TASOR2	0.0510752	0.686843
P78417	GSTO1	-0.058826	0.687543
Q9UDY2	TJP2	-0.152274	0.688251
P35237	SERPINB6	-0.0774206	0.688333
P54760	EPHB4	0.0772563	0.689445
Q9BY67	CADM1	-0.0731125	0.689596
P11137	MAP2	-0.0691027	0.689907
P40121	CAPG	0.0713795	0.689955
P16871	IL7R	-0.0499224	0.690674
Q99459	CDC5L	-0.0434784	0.691909
Q9Y5Y6	ST14	-0.0793903	0.692636
Q6Y7W6	GIGYF2	0.0856976	0.693056
Q02985	CFHR3	-0.0579314	0.693851
P01709	IGLV2-8	-0.0351915	0.694241
Q76FK4	NOL8	-0.0791678	0.694719
Q03164	KMT2A	0.100094	0.694876
P0DOX7		-0.033609	0.695046
P13798	APEH	-0.0715727	0.695597
P36269	GGT5	0.0695968	0.696027
P41271	NBL1	-0.0844422	0.697317
P11216	PYGB	-0.131711	0.697597
P15090	FABP4	0.0606555	0.697756
P17987	TCP1	0.0736521	0.697826
P43405	SYK	0.133211	0.699108
P78552	IL13RA1	-0.0644442	0.700722
Q86UX2	ITIH5	-0.0736945	0.700764
A8MTJ3;P04899;P08754;P09471;P11488;P19087;P38405;P63092;P63096;Q5JWF2	GNAT3;GNAI2;GNAI3;GNAO1;GNAT1;GNAT2;GNAL;GNAS;GNAI1;GNAS	-0.09356	0.700804
Q13291	SLAMF1	-0.0719078	0.701146
P54802	NAGLU	-0.0354928	0.701378
P54577	YARS1	0.0998533	0.702381
P80188	LCN2	0.0469877	0.703028
P20142	PGC	-0.0409179	0.704579
P42765	ACAA2	0.104923	0.705177
P06703	S100A6	0.0903884	0.706051
Q13835	PKP1	0.12592	0.707164
Q9HD45	TM9SF3	0.106127	0.708158
Q16394	EXT1	0.0656411	0.708972
Q13642	FHL1	-0.0723146	0.708974
P40227;Q92526	CCT6A;CCT6B	0.100792	0.709197
Q16181	SEPTIN7	-0.0940174	0.709304
Q8TEU8	WFIKKN2	0.0671436	0.709962
P15907	ST6GAL1	-0.08786	0.710028
Q9ULC0	EMCN	0.0848394	0.710392
Q9UNN8	PROCR	0.0477556	0.7116
P01880	IGHD	-0.0278425	0.712135
P28698	MZF1	-0.103499	0.712349
Q6ZMI3	GLDN	-0.0499507	0.71279
Q9BUD6	SPON2	0.0806582	0.714316
P18206	VCL	-0.0653698	0.714434
E9PAV3;Q13765	NACA	0.121292	0.715076
Q6ICL3	TANGO2	0.0948806	0.715806
Q13098	GPS1	0.0834093	0.717041
P02760	AMBP	0.0659558	0.717852
P21860	ERBB3	0.0756744	0.717914
O43264	ZW10	-0.0733649	0.718142
P04070	PROC	-0.0473342	0.719106
Q13087	PDIA2	-0.103445	0.719472
Q9HB71	CACYBP	-0.0760398	0.71951
Q9UBI4	STOML1	0.102617	0.720786
Q01638	IL1RL1	0.045811	0.720809
P07477	PRSS1	0.0448954	0.721045
Q6PI73	LILRA6	-0.036753	0.721576
Q8N128	FAM177A1	0.101855	0.722331
P17301	ITGA2	0.0426595	0.722398
Q9Y251	HPSE	0.0595146	0.724467
P08567	PLEK	-0.0766689	0.724651
P07988	SFTPB	-0.0828839	0.72472
P41212	ETV6	0.07834	0.72534
P00747	PLG	-0.0592427	0.726287
Q14974	KPNB1	0.0781819	0.727017
P09972	ALDOC	-0.0480318	0.727081
Q9BQ51	PDCD1LG2	0.0426392	0.727608
A0A075B6I0	IGLV8-61	-0.0323528	0.728471
P07437	TUBB	-0.0742132	0.728482
Q6P4E1	GOLM2	0.0679815	0.729296
P26006	ITGA3	0.0846513	0.730698
P05452	CLEC3B	0.0589601	0.730882
O75063	FAM20B	-0.0946376	0.731547
P13861	PRKAR2A	-0.140119	0.731999
Q00169	PITPNA	0.139756	0.732032
Q08431	MFGE8	0.129375	0.732203
Q5T2D2	TREML2	0.0492192	0.732402
P53004	BLVRA	-0.0754403	0.73249
P46109	CRKL	0.084374	0.733
P09486	SPARC	0.0754143	0.733356
P03952	KLKB1	-0.0506065	0.734086
Q70J99	UNC13D	-0.084257	0.734692
Q15084	PDIA6	0.0625621	0.7348
P50570	DNM2	-0.0795635	0.736159
P01876	IGHA1	-0.0438479	0.736302
P06276	BCHE	-0.0357525	0.736782
Q96PD2	DCBLD2	-0.0507197	0.736917
A0A0J9YX35	IGHV3-64D	0.0340608	0.737238
Q9P2B2	PTGFRN	0.124689	0.737947
Q99969	RARRES2	-0.0637119	0.738755
P00746	CFD	0.0503714	0.739229
P02750	LRG1	-0.0471334	0.739328
P11226	MBL2	-0.0195577	0.739782
Q96G03	PGM2	-0.0815929	0.74048
O94856	NFASC	-0.0836851	0.741265
P31151	S100A7	-0.0683297	0.741803
P17174	GOT1	-0.0407692	0.741976
P17980	PSMC3	0.106336	0.742356
Q92905	COPS5	-0.0742891	0.742726
Q15293	RCN1	-0.0741762	0.743494
P63010	AP2B1	0.116286	0.743813
Q8WVN6	SECTM1	-0.0552417	0.744359
P15531	NME1	-0.0679787	0.745096
P06213	INSR	0.113792	0.746304
P49747	COMP	0.0584831	0.747308
A0A0C4DH34	IGHV4-28	0.04648	0.747598
P00915	CA1	-0.0632334	0.747992
P02771	AFP	0.119398	0.74833
Q8WWZ8	OIT3	-0.0258365	0.749308
O00461	GOLIM4	-0.0515801	0.750369
O60610	DIAPH1	-0.0588308	0.750518
P22304	IDS	0.0509317	0.751162
P08174	CD55	-0.0660257	0.751861
A0A0A0MS15	IGHV3-49	-0.0302959	0.752208
P30041	PRDX6	-0.0639846	0.752308
P23435	CBLN1	0.0445916	0.753878
P10124	SRGN	0.0564367	0.75402
P30740	SERPINB1	-0.0661107	0.754145
P05787	KRT8	0.0697749	0.754161
P48506	GCLC	-0.0685263	0.754496
P07360	C8G	-0.0454557	0.754799
P07288	KLK3	-0.0782864	0.755038
P0DMM9;P0DMN0	SULT1A3;SULT1A4	0.0950048	0.756934
Q99460	PSMD1	-0.127309	0.757145
Q9UNS2	COPS3	-0.0963577	0.75739
Q8IXL6	FAM20C	-0.0386503	0.758398
Q9Y4L1	HYOU1	-0.0588289	0.759111
A5D6W6	FITM1	0.051149	0.759196
Q9UJW2	TINAG	-0.106142	0.759486
Q9H0T7	RAB17	-0.0797494	0.759853
Q12864	CDH17	0.0422993	0.760189
O43278	SPINT1	0.0478124	0.760513
Q27J81	INF2	0.117022	0.761118
Q86WS4	REDIC1	-0.0845678	0.762226
Q06830	PRDX1	-0.0625487	0.76256
Q06033	ITIH3	0.0333199	0.763544
P22223	CDH3	0.0811927	0.764874
P11413	G6PD	-0.0599463	0.765021
Q13508	ART3	0.0326724	0.765674
Q969H8	MYDGF	-0.0568836	0.766404
P22314	UBA1	-0.0607835	0.767124
P10321	HLA-C	-0.0260626	0.76791
O94769	ECM2	-0.0521269	0.768127
Q9NR34	MAN1C1	-0.0656499	0.770295
Q8IW52	SLITRK4	0.0639206	0.770357
P26641	EEF1G	-0.0585477	0.770424
P02768	ALB	0.040183	0.770494
Q8IXQ6	PARP9	-0.0671872	0.770915
Q9H939	PSTPIP2	0.0710991	0.772011
Q08999	RBL2	0.114957	0.77229
P29122	PCSK6	0.0647592	0.772873
Q5M775	SPECC1	0.0740186	0.774461
Q15327	ANKRD1	0.059888	0.77594
P49247	RPIA	-0.0410916	0.775995
P30305	CDC25B	-0.0491777	0.776625
P00742	F10	-0.0429307	0.776926
Q9H2K8	TAOK3	0.121922	0.777276
Q6ZNB6	NFXL1	-0.0492481	0.777707
P09211	GSTP1	0.0524937	0.778232
Q9NQC7	CYLD	0.0853093	0.77898
Q06495	SLC34A1	0.0891527	0.77949
P15941	MUC1	0.0465286	0.779572
Q9Y613	FHOD1	0.108148	0.780548
Q59EK9	RUNDC3A	-0.0541986	0.780677
Q92882	OSTF1	-0.110031	0.781158
Q9NY33	DPP3	-0.0503467	0.782338
P28799	GRN	-0.0424786	0.782421
Q9UMY4	SNX12	-0.0518859	0.783467
Q9BZR6	RTN4R	0.0629161	0.783512
Q9Y4D1	DAAM1	-0.0592514	0.783828
Q8IWJ2	GCC2	-0.0832729	0.783852
P53602	MVD	0.110974	0.786079
Q8WUJ3	CEMIP	-0.0420449	0.786955
Q9BY12	SCAPER	-0.0692369	0.787328
P06132	UROD	-0.0535192	0.788288
Q8WWA0	ITLN1	-0.0269913	0.78964
P05089	ARG1	0.058266	0.789648
Q9HCU0	CD248	-0.053586	0.790059
B9A064;P0DOX8	IGLL5;	-0.0251826	0.790251
P07949	RET	-0.0426067	0.790387
P55036	PSMD4	0.429745	0.790566
O75347	TBCA	-0.0560616	0.790727
A6NH11	GLTPD2	0.0497063	0.790747
Q15223	NECTIN1	0.0430506	0.791184
P03973	SLPI	-0.051849	0.792479
O95502	NPTXR	0.0622891	0.792642
P49641	MAN2A2	-0.037009	0.792714
P08476	INHBA	-0.0838853	0.793565
Q16620	NTRK2	-0.0732217	0.793658
O75882	ATRN	0.0447419	0.794002
Q8IWL1;Q8IWL2	SFTPA2;SFTPA1	0.0310105	0.794302
P11279	LAMP1	-0.0462092	0.794351
Q08830	FGL1	0.0420164	0.795486
Q16543	CDC37	0.0734018	0.796576
Q9H3S1	SEMA4A	-0.0490055	0.797764
Q7Z2Q7	LRRC70	0.0697706	0.798137
O60493	SNX3	0.0587933	0.798862
Q8WUM4	PDCD6IP	0.0502289	0.799224
Q92743	HTRA1	-0.053215	0.799637
P51888	PRELP	-0.0508836	0.80072
Q9Y286	SIGLEC7	0.0563369	0.800999
O15067	PFAS	0.0830412	0.801807
P07996	THBS1	0.0495689	0.801837
A0A0C4DH41;P01824;P01825;P06331;P0DP06;P0DP08	IGHV4-61;IGHV4-39;IGHV4-59;IGHV4-34;IGHV4-30-4;IGHV4-38-2	-0.0294301	0.802649
Q9UM47	NOTCH3	-0.0499737	0.80296
P35527	KRT9	-0.0503824	0.803609
Q99426	TBCB	0.0791675	0.8043
Q92485	SMPDL3B	-0.0619719	0.805033
O00533	CHL1	-0.0256056	0.805324
Q9BRK5	SDF4	-0.0406279	0.806376
P30086	PEBP1	-0.0447015	0.80748
P15169	CPN1	0.0228631	0.807496
Q14623	IHH	0.0681168	0.808279
P23526	AHCY	-0.0463824	0.808814
P20138	CD33	0.0639264	0.809733
Q96CG8	CTHRC1	-0.0464949	0.809797
Q13683	ITGA7	0.0450043	0.81015
Q93070	ART4	-0.035894	0.810281
A0A0C4DH36	IGHV3-38	-0.0482784	0.811659
Q7Z5N4	SDK1	0.0398065	0.81181
Q9BRF8	CPPED1	-0.0598976	0.81191
O43827	ANGPTL7	0.0378696	0.812078
P10619	CTSA	0.0253795	0.812139
Q8TF66	LRRC15	0.0364069	0.812614
Q14C87	TMEM132D	0.100857	0.813774
P12830	CDH1	0.0378925	0.813782
P48147	PREP	0.16335	0.814431
P11717	IGF2R	0.0358943	0.814526
Q05513	PRKCZ	-0.0441596	0.814692
P31146	CORO1A	-0.0444528	0.815049
Q9UBG0	MRC2	0.0358035	0.815596
O00592	PODXL	0.0465254	0.81609
Q9H2X3	CLEC4M	0.033011	0.816094
Q9Y279	VSIG4	0.0423251	0.816388
P28300	LOX	-0.0412255	0.81656
P02776	PF4	-0.0450955	0.817584
P62195	PSMC5	0.0577907	0.81851
P13716	ALAD	-0.0425798	0.818733
P14222	PRF1	0.0416311	0.818803
O00160	MYO1F	0.105487	0.819495
Q93098	WNT8B	-0.0509598	0.820555
Q9BS26	ERP44	0.0220544	0.820868
P22234	PAICS	-0.0483473	0.822359
P16109	SELP	-0.0384358	0.822363
P14314	PRKCSH	-0.0413259	0.822392
P49327	FASN	-0.0588684	0.822602
P00488	F13A1	0.0331454	0.82349
P08217	CELA2A	-0.0484614	0.826549
Q8TAB3	PCDH19	0.0639721	0.826716
P22891	PROZ	-0.0258803	0.826962
P30085	CMPK1	0.0491383	0.827714
Q9UDX3	SEC14L4	-0.0383441	0.827879
O60306	AQR	0.0560692	0.828611
P0DOX5		-0.0371034	0.828743
P53396	ACLY	0.0472296	0.829955
P02775	PPBP	-0.0434073	0.83269
P14780	MMP9	-0.0277235	0.832754
P32942	ICAM3	0.023733	0.8338
Q14982	OPCML	-0.0358638	0.833906
P01008	SERPINC1	0.0313003	0.834424
Q15477	SKIC2	0.100843	0.834914
P11277	SPTB	-0.0701574	0.83526
Q13332	PTPRS	0.0304475	0.836526
P15086	CPB1	0.0255871	0.836777
Q4LDE5	SVEP1	-0.0229747	0.837049
Q86VZ4	LRP11	-0.0463962	0.837078
P02747	C1QC	0.0320621	0.837094
Q14141	SEPTIN6	-0.0383858	0.83762
O75832	PSMD10	0.0674732	0.83783
Q14012	CAMK1	0.0487068	0.837979
Q9NR12	PDLIM7	0.0427978	0.838522
Q53EP0	FNDC3B	0.0512985	0.839081
Q92686	NRGN	-0.0484582	0.839359
P15085	CPA1	-0.0248945	0.839472
Q9Y6N7	ROBO1	-0.0262207	0.839563
P99999	CYCS	0.0344124	0.839641
Q8N8A6	DDX51	0.0923668	0.839796
P15374	UCHL3	0.0743831	0.840293
Q99733	NAP1L4	0.0453119	0.840732
Q6UXH9	PAMR1	-0.0397442	0.840972
Q96PE2	ARHGEF17	0.0764824	0.841574
Q13103	SPP2	-0.0214801	0.841773
O75581	LRP6	0.0338702	0.842396
Q53S08;Q9H0N0	RAB6D;RAB6C	0.061747	0.842921
Q9HD89	RETN	0.0365416	0.843109
P48551	IFNAR2	-0.0357174	0.843892
Q8N4P3	HDDC3	-0.0476196	0.844201
Q9H444	CHMP4B	0.046411	0.844342
Q9BZE1	MRPL37	0.0555993	0.844434
Q13630	GFUS	0.0430456	0.845145
P06732	CKM	-0.0216213	0.845857
Q9Y6C2	EMILIN1	-0.0338675	0.845868
Q9Y5W7	SNX14	-0.091781	0.846302
P13164;Q01628;Q01629	IFITM1;IFITM3;IFITM2	-0.0395276	0.846357
P50395	GDI2	-0.0378482	0.846909
P10253	GAA	-0.024774	0.847162
P54652	HSPA2	-0.132361	0.847296
P41250	GARS1	-0.053635	0.847785
Q8IUX7	AEBP1	-0.0345324	0.847877
P20930	FLG	0.0474323	0.848482
P13473	LAMP2	-0.0257632	0.8485
A0A0C4DH24	IGKV6-21	0.0251867	0.848696
P04075	ALDOA	0.0323894	0.849204
P00450	CP	-0.0224839	0.84924
P00451	F8	0.0261386	0.849593
O60888	CUTA	0.0295146	0.849924
O75791	GRAP2	0.0624968	0.850546
P00480	OTC	-0.031229	0.850607
Q99983	OMD	-0.0214041	0.850728
P52948	NUP98	-0.0463831	0.851005
Q9UBQ6	EXTL2	0.0323467	0.852195
P14618	PKM	-0.0329225	0.852289
P35590	TIE1	-0.0199725	0.852353
Q6QNK2	ADGRD1	-0.0333604	0.852663
P30043	BLVRB	-0.0356488	0.852756
Q13219	PAPPA	-0.0397985	0.854163
Q8NCL4	GALNT6	0.0316301	0.854164
P48740	MASP1	-0.0255151	0.854611
Q9Y4C0	NRXN3	0.0401522	0.854616
Q8N0V5	GCNT2	-0.037541	0.854716
A0A0B4J1X5	IGHV3-74	0.0147157	0.854803
Q9H1E1	RNASE7	-0.028082	0.85571
P08670	VIM	0.036473	0.855855
Q9NP79	VTA1	0.0864962	0.855928
P49407	ARRB1	0.0426183	0.856012
P25445	FAS	-0.0679745	0.856538
P52790	HK3	-0.0322942	0.856863
Q8TEA8	DTD1	0.0426527	0.856973
Q7Z7M8	B3GNT8	0.0228475	0.857887
P04083	ANXA1	0.0328796	0.858996
Q6FHJ7	SFRP4	-0.0321047	0.859452
Q86VP6	CAND1	0.0347567	0.859861
P16233	PNLIP	0.0207738	0.86031
Q9C0C9	UBE2O	0.0383797	0.860681
Q9BX93	PLA2G12B	-0.0707496	0.861244
P00167	CYB5A	0.0501894	0.861752
P14324	FDPS	-0.0335672	0.861787
P00918	CA2	-0.0363237	0.862055
P00441	SOD1	-0.0345908	0.862173
Q8TEM1	NUP210	0.0392527	0.863503
Q96P63	SERPINB12	0.0745048	0.864303
A0A0B4J1Y9	IGHV3-72	-0.0523503	0.864573
Q9H4M9	EHD1	0.0605438	0.8655
Q8WZA0	LZIC	-0.0731173	0.865504
P84090	ERH	-0.0383707	0.86701
P01717	IGLV3-25	-0.0159811	0.867012
Q86YW5	TREML1	0.0521488	0.867381
P10072;P17040	ZNF875;ZSCAN20	-0.0621855	0.868973
P05556	ITGB1	-0.0322342	0.869145
Q15375	EPHA7	-0.0346907	0.869435
Q9Y6Y9	LY96	0.0714552	0.869957
Q15063	POSTN	-0.0206793	0.870663
Q8WTQ4	C16orf78	0.0152272	0.871718
P27105	STOM	-0.0375268	0.872397
P23142	FBLN1	0.0196116	0.873021
Q7L576	CYFIP1	0.0342514	0.873895
P01344	IGF2	0.0257071	0.874413
Q8IWU5	SULF2	-0.0331694	0.875805
Q15126	PMVK	0.0413273	0.876095
P56199	ITGA1	-0.0248403	0.876556
P31939	ATIC	-0.0337838	0.876696
P02545	LMNA	0.031074	0.877723
Q8WUT4	LRRN4	-0.0236957	0.878273
P49746	THBS3	-0.031106	0.878548
Q96IY4	CPB2	-0.023245	0.878935
P01834	IGKC	-0.0134899	0.880118
Q13867	BLMH	0.0190975	0.880175
P04632	CAPNS1	-0.0292065	0.881378
P08493	MGP	-0.0249747	0.881628
Q15435	PPP1R7	-0.0307744	0.882214
Q13617	CUL2	-0.0556925	0.882681
Q9BT78	COPS4	0.0427667	0.882706
Q7KZF4	SND1	0.0358563	0.882841
Q5SRI9	MANEA	-0.0614267	0.884811
Q15691	MAPRE1	-0.0322024	0.884821
P09493	TPM1	-0.0294063	0.884838
Q9Y274	ST3GAL6	-0.0209395	0.885034
Q92765	FRZB	0.0773174	0.885094
P48052	CPA2	-0.0393489	0.886095
Q9BWV1	BOC	-0.0268441	0.886161
O15400	STX7	-0.0539841	0.887017
Q14697	GANAB	0.0196559	0.887025
P20700	LMNB1	-0.0237883	0.887258
P78509	RELN	-0.0200524	0.887834
Q8NI17	IL31RA	0.0328196	0.888266
P07311	ACYP1	-0.0380198	0.888894
P09172	DBH	0.00430236	0.889273
P07858	CTSB	0.0156908	0.889493
Q14515	SPARCL1	-0.0160388	0.889655
P62942	FKBP1A	-0.0244873	0.889661
P28072	PSMB6	-0.0275331	0.889974
P07951	TPM2	0.0308194	0.89062
Q9H4A9	DPEP2	0.0155904	0.891253
P08962	CD63	-0.0428859	0.891737
O43653	PSCA	0.023193	0.892077
O75340	PDCD6	0.024383	0.89224
P13796	LCP1	-0.0243042	0.892432
Q9NTK5	OLA1	-0.0274833	0.892876
P16150	SPN	-0.0448925	0.892964
Q9C0C4	SEMA4C	0.0273842	0.893147
Q5VW32	BROX	-0.0451322	0.893317
A0A075B6I9	IGLV7-46	0.0137071	0.895405
Q96DA0	ZG16B	0.036917	0.895622
P61769	B2M	0.0215803	0.895668
Q8NEE6	FBXL13	0.0380855	0.896179
Q9NWQ8	PAG1	-0.0315085	0.896566
Q6V0I7	FAT4	0.0263914	0.898431
P07741	APRT	-0.0322192	0.898542
A0A0B4J1V0	IGHV3-15	-0.0160311	0.898645
P01699	IGLV1-44	-0.0328946	0.898756
Q86WJ1	CHD1L	-0.0325753	0.89935
A0A075B6S5	IGKV1-27	0.0367455	0.899351
O43242	PSMD3	0.0375615	0.899664
Q14314	FGL2	0.0208013	0.900567
P05106	ITGB3	-0.022641	0.901122
O14672	ADAM10	-0.040235	0.901348
P38571	LIPA	-0.0194373	0.901588
P62937	PPIA	0.0249066	0.902658
Q99497	PARK7	-0.0260117	0.903464
Q13094	LCP2	0.0277659	0.903683
Q14116	IL18	-0.0333943	0.904268
P29622	SERPINA4	0.0177599	0.904674
P61006	RAB8A	-0.0405039	0.904865
Q99784	OLFM1	-0.0177981	0.907027
P52799	EFNB2	-0.0313409	0.908569
P10643	C7	0.0126226	0.908681
P48444	ARCN1	-0.0472056	0.909662
P15291	B4GALT1	0.0156294	0.910792
P40306	PSMB10	-0.0267037	0.911141
Q7Z4S6	KIF21A	0.0295045	0.912546
Q96CX2	KCTD12	-0.0153302	0.9128
Q9ULI3	HEG1	0.0165497	0.914004
P61604	HSPE1	-0.0221077	0.914202
P0CG47;P0CG48;P62979;P62987	UBB;UBC;RPS27A;UBA52	0.022326	0.914232
Q8IZP9	ADGRG2	0.295124	0.914468
P01833	PIGR	0.0131574	0.914583
Q15257	PTPA	-0.0203352	0.9148
A6NM03;Q9H205	OR2AG2;OR2AG1	-0.0240913	0.915294
O43681	GET3	0.0598297	0.91572
A0A0C4DH67	IGKV1-8	0.0165012	0.915897
P17050	NAGA	-0.0152455	0.915927
P28070	PSMB4	0.0187577	0.916403
P25789	PSMA4	-0.0152594	0.916826
P61019	RAB2A	0.022962	0.916903
P61626	LYZ	0.0140615	0.916923
P13598	ICAM2	-0.0158903	0.916975
P01766	IGHV3-13	-0.0343299	0.917049
Q6GPI1	CTRB2	0.0123232	0.917166
A0M8Q6	IGLC7	0.0445088	0.917993
P24387	CRHBP	-0.0186396	0.918883
Q9NY97	B3GNT2	0.0188052	0.919849
P08648	ITGA5	0.017614	0.920108
P01742	IGHV1-69	-0.0194415	0.922064
Q8IV08	PLD3	0.0136841	0.922467
O60760	HPGDS	0.0156729	0.922995
Q9H501	ESF1	0.0265171	0.923288
Q9NZI2	KCNIP1	-0.0236009	0.923991
P20933	AGA	-0.0124276	0.924647
Q16775	HAGH	0.0186591	0.924672
P40189	IL6ST	0.0174072	0.925282
Q9HAT2	SIAE	-0.0156632	0.925323
Q9H3G5	CPVL	0.0149918	0.925946
Q8WVQ1	CANT1	-0.0143371	0.926302
Q9NZU0	FLRT3	0.0228909	0.927484
O14638	ENPP3	0.0206488	0.927765
Q9NWX6	THG1L	0.0297381	0.927816
Q96JP2	MYO15B	0.0237379	0.928038
A0A0A0MRZ8;P04433	IGKV3D-11;IGKV3-11	-0.0103663	0.929129
P22792	CPN2	0.0110178	0.930773
P05976	MYL1	-0.0159539	0.932522
Q6UY14	ADAMTSL4	0.00932758	0.932802
P23468	PTPRD	-0.0117312	0.933458
Q9NQS3	NECTIN3	-0.015688	0.934747
P35555	FBN1	-0.0168216	0.93486
P01619	IGKV3-20	-0.00686431	0.936057
P49257	LMAN1	0.00710739	0.936098
P10768	ESD	0.0163714	0.936445
P02461	COL3A1	-0.0154556	0.936791
A0A087WSY6	IGKV3D-15	-0.0144189	0.937318
P10721	KIT	-0.00987189	0.938415
Q16531	DDB1	-0.0161078	0.938961
A0A075B6H9	IGLV4-69	-0.0369072	0.93936
P48426	PIP4K2A	0.0165746	0.939749
Q9UHJ6	SHPK	0.034337	0.940278
P14735	IDE	-0.0163566	0.940491
Q96DG6	CMBL	0.0155934	0.940537
P35247	SFTPD	-0.0088952	0.9411
Q00537	CDK17	0.0210779	0.942362
O14745	NHERF1	-0.0169694	0.943144
Q9H2H8	PPIL3	0.0303439	0.943303
Q4KMG0	CDON	-0.0129426	0.943589
Q8IUK8	CBLN2	0.0125313	0.943773
P08514	ITGA2B	0.0123338	0.944418
Q8N6C8	LILRA3	-0.00736306	0.945339
P00491	PNP	-0.0140762	0.945587
P26447	S100A4	0.0125272	0.946031
Q9HCM2	PLXNA4	-0.0177876	0.94634
Q9HCM3	KIAA1549	0.0216936	0.946413
P30040	ERP29	-0.0128533	0.947975
O43852	CALU	-0.0124672	0.948447
Q00534	CDK6	-0.015074	0.949336
Q9UIB8	CD84	0.0111077	0.949715
Q15555	MAPRE2	0.0120942	0.949845
Q9UBR2	CTSZ	0.00723117	0.950398
P55072	VCP	0.0116103	0.951007
Q04760	GLO1	0.0123149	0.952797
Q04756	HGFAC	0.00918068	0.953435
Q9NZT1	CALML5	0.0181606	0.954194
Q8IWB9	TEX2	-0.00855298	0.954236
P07148	FABP1	0.00786419	0.955131
Q01459	CTBS	0.00533805	0.955423
P07476	IVL	0.0076717	0.956009
Q58EX2	SDK2	0.00934136	0.956643
P03951	F11	-0.00821938	0.956943
P10599	TXN	-0.0115677	0.957723
P01599	IGKV1-17	0.00403365	0.959474
P53634	CTSC	0.00567349	0.960613
P01591	JCHAIN	-0.00353406	0.961481
P02774	GC	0.00750909	0.961536
P04217	A1BG	-0.00637327	0.961631
Q96AD5	PNPLA2	-0.0306952	0.961642
Q9NT99	LRRC4B	0.010879	0.961678
P50990	CCT8	-0.0102825	0.962117
P55291	CDH15	-0.00430875	0.962722
Q8NFL0	B3GNT7	-0.00940471	0.962996
Q96FN5	KIF12	0.0103912	0.963256
Q9UP79	ADAMTS8	-0.00999019	0.963353
P35442	THBS2	0.00736476	0.963419
O95477	ABCA1	-0.0099339	0.963604
A0A0G2JS06	IGLV5-39	-0.0113988	0.96483
Q15323	KRT31	-0.0188247	0.965158
P07195	LDHB	-0.00620075	0.965224
P61916	NPC2	0.00821572	0.965894
Q13444	ADAM15	0.00974392	0.966064
Q9BRK3	MXRA8	-0.00953411	0.966389
Q14103	HNRNPD	0.0188699	0.966581
P04004	VTN	-0.007733	0.966918
P61201	COPS2	0.0107422	0.96763
A0A075B6Q5	IGHV3-64	-0.0080687	0.968475
Q15056	EIF4H	0.00919003	0.968743
Q9UJ41	RABGEF1	-0.00901935	0.969163
Q6ZR08	DNAH12	-0.0100853	0.96952
Q5JRA6	MIA3	0.00684261	0.969592
O00442	RTCA	0.00730884	0.969823
Q8IZA0	KIAA0319L	-0.00740782	0.970141
Q8WV16	DCAF4	0.00864941	0.970908
P24666	ACP1	-0.00743255	0.971006
Q155Q3	DIXDC1	0.0111455	0.97173
P04211	IGLV7-43	0.00866177	0.971953
P07203	GPX1	-0.00726018	0.972108
Q96FW1	OTUB1	-0.00979325	0.972211
Q9NS98	SEMA3G	0.0067747	0.972889
P16083	NQO2	0.00283417	0.973087
O76074	PDE5A	-0.00689694	0.973639
P01033	TIMP1	-0.00674411	0.973833
P14868	DARS1	0.00735604	0.974149
O43396	TXNL1	-0.00673898	0.974196
O95980	RECK	0.00602157	0.975032
Q86YT9	JAML	-0.0043941	0.975288
P48556	PSMD8	-0.0104988	0.975367
P00739	HPR	0.00429758	0.97571
Q7LFX5	CHST15	-0.00630348	0.976303
Q13275	SEMA3F	-0.00593671	0.976598
Q9NZE8	MRPL35	0.0062243	0.9787
P54578	USP14	-0.00567178	0.979207
P30530	AXL	-0.00415872	0.979384
P45974	USP5	0.0048831	0.979631
P24592	IGFBP6	-0.00446521	0.980721
Q9H9E3	COG4	0.00343253	0.981355
P17252	PRKCA	0.00311333	0.982665
P30626	SRI	-0.00454911	0.982941
Q93063	EXT2	0.00394667	0.98314
P18564	ITGB6	0.00389398	0.98334
Q5T4S7	UBR4	-0.00787928	0.984036
P52209	PGD	0.00360888	0.984057
P54317	PNLIPRP2	0.00352626	0.984199
Q08174	PCDH1	-0.00289689	0.984526
P63241	EIF5A	0.0042191	0.984595
Q15121	PEA15	0.00534083	0.985016
Q9HCN6	GP6	-0.00381911	0.985023
P00734	F2	0.00291563	0.986281
Q08554	DSC1	0.00253915	0.988031
Q12860	CNTN1	-0.00172383	0.989799
Q99941	ATF6B	-0.00187131	0.990434
P09382	LGALS1	0.00225483	0.990507
P43251	BTD	0.00118961	0.992367
P00533	EGFR	-0.00168768	0.992459
Q9BTY2	FUCA2	0.000243723	0.9931
P11150	LIPC	-0.000918806	0.993402
P02749	APOH	0.00128713	0.994223
Q10472	GALNT1	-0.00108872	0.99536
Q32P28	P3H1	-0.00225258	0.995787
P62495	ETF1	-0.00115576	0.995788
O15230	LAMA5	0.00084094	0.996064
P35579	MYH9	0.000586682	0.997415
O94923	GLCE	-0.000534044	0.997902
P42126	ECI1	-0.000399002	0.998157
P02753	RBP4	0.000293607	0.998423
Q6KB66	KRT80	0	1
Q96EK6	GNPNAT1	0	1
Q9Y3C6	PPIL1	0	1
P0DTE1	IGHV3-38-3
P24844	MYL9
Q9NVG8	TBC1D13
Q9Y227	ENTPD4

## Sheet: PCA
ProteinID	GeneID	Estimate	P_value
Q92954	PRG4	-0.451706	0.000179283
P06454	PTMA	-0.73471	0.00104761
Q68BL7	OLFML2A	-0.787651	0.00112195
P33151	CDH5	0.395749	0.00155109
Q9UL68	MYT1L	-0.597559	0.00169388
P05156	CFI	-0.515815	0.00183919
Q9BWV1	BOC	0.492249	0.00302819
Q12907	LMAN2	-0.422909	0.00317484
Q8WZ75	ROBO4	0.509544	0.00350639
P10912	GHR	-0.256092	0.00352595
P51161	FABP6	0.823409	0.0044462
P02452	COL1A1	-0.525095	0.00608047
P09211	GSTP1	-0.808087	0.00732047
P12109	COL6A1	0.637296	0.00918531
Q9H4G4	GLIPR2	0.63467	0.0100965
B2RPK0;P09429	HMGB1P1;HMGB1	0.761321	0.0103946
Q96BD5	PHF21A	0.597218	0.0105329
P02652	APOA2	-0.291726	0.0110084
P16581	SELE	-0.373914	0.0110572
P47914	RPL29	-0.565261	0.0116761
Q9BYE9	CDHR2	-0.236927	0.0121698
Q8WV28	BLNK	-0.59356	0.013336
Q9UGM5	FETUB	-0.331429	0.0134673
P07359	GP1BA	0.401507	0.0160302
Q86VB7	CD163	-0.419735	0.0160914
Q7Z7G0	ABI3BP	-0.350998	0.016164
O00592	PODXL	0.315183	0.0163451
P14555	PLA2G2A	0.430904	0.0178253
O75636	FCN3	0.756933	0.0179215
P55145	MANF	-0.48851	0.0182645
Q14966	ZNF638	1.02292	0.018522
P05154	SERPINA5	-0.259865	0.0185825
O95497	VNN1	-0.167877	0.0198705
Q9NZP8	C1RL	-0.300297	0.0200414
Q06323	PSME1	-0.660523	0.0200803
Q13510	ASAH1	0.783675	0.0206268
P05452	CLEC3B	0.150566	0.0207223
P84157	MXRA7	0.380502	0.0210563
O43491	EPB41L2	-0.508383	0.0210996
Q99996	AKAP9	-0.314299	0.0218395
Q76M96	CCDC80	-0.424752	0.0231585
P20929	NEB	-0.759324	0.0239366
Q05707	COL14A1	-0.314824	0.0254529
A8MVW5	HEPACAM2	0.230449	0.0258749
P27918	CFP	-0.351406	0.0263727
Q8NBJ4	GOLM1	-0.198833	0.0279398
P23467	PTPRB	0.252995	0.0310625
P81172	HAMP	-0.571221	0.0325182
Q9P232	CNTN3	-0.283829	0.0333847
Q12805	EFEMP1	0.364165	0.0336863
P06681	C2	-0.289208	0.0348862
Q01546	KRT76	1.09957	0.0355773
P01703	IGLV1-40	-0.397776	0.0372286
P51460	INSL3	-0.322423	0.0372917
Q9H0E7	USP44	-0.517214	0.0373321
Q3T906	GNPTAB	0.430808	0.0374219
Q6EEV4	POLR2M	0.700115	0.0398439
P08572	COL4A2	0.375576	0.0409884
Q9GZP0	PDGFD	-0.979091	0.0413161
P52565	ARHGDIA	-0.452237	0.0414487
P61353	RPL27	-0.371531	0.0423569
Q6UXB3	LYPD2	-0.54804	0.0432714
Q92542	NCSTN	-0.653247	0.0433345
P50120	RBP2	0.563158	0.0437128
A0A087WW87;P01614	IGKV2-40;IGKV2D-40	0.401408	0.0447753
P01036	CST4	1.09361	0.0449282
A6NFK2	GRXCR2	0.281796	0.0452724
P62328	TMSB4X	-0.428577	0.0460538
P05387	RPLP2	-0.368967	0.0461256
Q96RT8	TUBGCP5	0.485095	0.0483277
P00746	CFD	0.272821	0.0483764
Q9ULC0	EMCN	0.3085	0.0486358
Q9BWP8	COLEC11	-0.294267	0.0492098
Q8NBJ5	COLGALT1	0.413132	0.0501316
P16949	STMN1	-0.487854	0.0503152
P08238	HSP90AB1	-0.679426	0.0504669
Q08380	LGALS3BP	-0.186594	0.051637
O15231	ZNF185	0.699937	0.051884
P21810	BGN	-0.477422	0.0518873
Q9Y4G2	PLEKHM1	0.367569	0.053063
P0DP57	SLURP2	-0.402074	0.0534893
P49913	CAMP	-0.208654	0.0537161
P13646	KRT13	0.467241	0.0539538
P22749	GNLY	0.459746	0.0540258
P07307	ASGR2	-0.340886	0.0557525
P25116	F2R	0.548182	0.0559748
P98160	HSPG2	0.276734	0.0567065
Q8N2W9	PIAS4	-0.387365	0.0570646
Q5KU26	COLEC12	0.309845	0.0587628
Q9GZX9	TWSG1	0.583985	0.060381
P04114	APOB	0.294579	0.0608474
P19256	CD58	0.295627	0.0610995
P20138	CD33	0.21754	0.0618682
P07858	CTSB	0.310053	0.0622802
P59665;P59666	DEFA1;DEFA3	-0.332428	0.0622963
Q02985	CFHR3	-0.205175	0.0623641
P02765	AHSG	-0.246506	0.0638733
P63104	YWHAZ	0.489762	0.0644673
Q9UBB9	TFIP11	-0.310052	0.0657099
Q9ULF5	SLC39A10	0.45298	0.065997
P20472	PVALB	0.225685	0.066554
O15118	NPC1	0.424373	0.0665756
Q9Y6C2	EMILIN1	0.394078	0.0665894
P0C7I6	CCDC159	-0.44426	0.0671404
O60602	TLR5	-0.233816	0.0682887
P35613	BSG	0.396284	0.069953
Q92673	SORL1	-0.41532	0.0705114
P10074	ZBTB48	-0.198312	0.0707176
Q0IIM8	TBC1D8B	-0.585983	0.0709611
B7ZW38;O60812;P0DMR1	HNRNPCL3;HNRNPCL1;HNRNPCL4	-0.336976	0.0717131
P52758	RIDA	-0.277342	0.0721575
P09758	TACSTD2	-0.873118	0.0725258
Q14315	FLNC	0.27661	0.0728057
Q13201	MMRN1	0.259817	0.0734545
P0DJI9	SAA2	-0.420076	0.0739608
A0A0B4J2D9;P0DP09	IGKV1D-13;IGKV1-13	0.338665	0.0754665
P01034	CST3	0.253892	0.0776421
P14778	IL1R1	-0.242443	0.0790675
P23142	FBLN1	0.267624	0.0791406
Q8TEM1	NUP210	0.308017	0.079199
Q6UWL2	SUSD1	0.345888	0.0812555
Q1MX18	INSC	-0.907474	0.0833877
Q0VAF6	SYCN	-0.294443	0.0836558
A0A075B6H9	IGLV4-69	0.527326	0.0854182
Q9P0S2	COX16	0.478063	0.0863413
A0A0G2JS06	IGLV5-39	-0.182483	0.0866716
P08138	NGFR	0.406501	0.0880242
O60888	CUTA	-0.280615	0.088243
O15354	GPR37	-0.513319	0.0885086
P55103	INHBC	-0.354506	0.0888399
Q6UY14	ADAMTSL4	0.330952	0.0916335
P08311	CTSG	0.323765	0.0927206
P24043	LAMA2	0.268474	0.0939396
P12955	PEPD	0.423587	0.096499
P05543	SERPINA7	-0.0682957	0.0968152
O75629	CREG1	-0.353065	0.0995366
Q9NYB0	TERF2IP	0.385961	0.100635
Q8TAG5	VSTM2A	0.424342	0.102911
Q07020	RPL18	0.383206	0.103118
P02778	CXCL10	-0.299877	0.10415
P47992;Q9UBD3	XCL1;XCL2	0.551781	0.104562
Q07092	COL16A1	0.524689	0.105024
P02741	CRP	-0.230501	0.105219
P41271	NBL1	-0.266502	0.106263
P20930	FLG	0.361683	0.106941
O75689	ADAP1	0.671273	0.107512
P30740	SERPINB1	0.302971	0.10773
Q9NT99	LRRC4B	-0.315776	0.108363
O94992	HEXIM1	-0.334972	0.109793
Q8TAT5	NEIL3	-0.343616	0.10998
Q9BW30	TPPP3	0.357565	0.110255
P00915	CA1	-0.33009	0.11065
P08185	SERPINA6	-0.261921	0.111165
P60174	TPI1	-0.356804	0.111326
P05155	SERPING1	-0.204641	0.111346
Q86WC4	OSTM1	0.209188	0.113157
Q86TZ1	TTC6	-0.420975	0.113882
Q9UJJ9	GNPTG	0.357476	0.115044
Q6ZMZ3	SYNE3	-0.296781	0.117548
A0A0B4J1V2	IGHV2-26	-0.318485	0.117566
P35916	FLT4	-0.182863	0.117596
P23280	CA6	-0.413074	0.118243
P12314	FCGR1A	-0.433785	0.1185
P23470	PTPRG	-0.223207	0.118778
P06213	INSR	-0.452391	0.118859
P18206	VCL	0.406736	0.119286
P06702	S100A9	-0.309845	0.119714
A0A0C4DH34	IGHV4-28	-0.224767	0.119963
O14950;P19105	MYL12B;MYL12A	0.494907	0.12066
Q99689	FEZ1	-0.340832	0.121602
P78310	CXADR	0.886485	0.122366
Q8IVF2	AHNAK2	-0.382746	0.122645
Q6UXV1	IZUMO2	-0.16258	0.122909
Q9Y2J2	EPB41L3	-0.598972	0.123781
Q5SY68	S100A7L2	-0.321902	0.124367
P20851	C4BPB	0.268809	0.124712
P05160	F13B	0.242877	0.126191
Q96AP7	ESAM	0.263413	0.127303
Q7Z794	KRT77	0.475159	0.130433
P31944	CASP14	-0.333778	0.130458
P12107	COL11A1	0.369583	0.13224
P03973	SLPI	-0.275674	0.132816
Q14515	SPARCL1	0.245774	0.135267
P01602	IGKV1-5	-0.257837	0.135659
P18065	IGFBP2	0.443645	0.136067
P06576	ATP5F1B	-0.463601	0.136558
Q14314	FGL2	-0.225583	0.138029
Q8WWA1	TMEM40	-0.350651	0.138698
Q01974	ROR2	0.346295	0.138989
P50281	MMP14	0.252115	0.139423
P07195	LDHB	0.407859	0.141306
Q8NBP7	PCSK9	0.400161	0.143333
P28845	HSD11B1	0.587911	0.144846
Q6NUS6	TCTN3	-0.195073	0.146068
P55058	PLTP	-0.201147	0.146967
Q9UBU2	DKK2	-0.443199	0.147073
P05019	IGF1	0.315791	0.148031
P12318	FCGR2A	-0.1242	0.148215
A8MU46	SMTNL1	0.435666	0.151985
P55259	GP2	0.183889	0.15212
Q9H257	CARD9	-0.0796841	0.152233
Q01638	IL1RL1	0.169011	0.155558
Q02487	DSC2	0.256344	0.155719
O60704	TPST2	0.260619	0.157852
O60716	CTNND1	0.434769	0.15885
Q16288	NTRK3	0.206078	0.158912
Q6UXB2	CXCL17	0.357564	0.16104
Q9H0X4	FAM234A	0.335119	0.162054
Q9UNN8	PROCR	-0.185784	0.162823
A6ND36	FAM83G	-0.377142	0.163045
P31025	LCN1	-0.318243	0.164452
P10909	CLU	-0.219735	0.165189
E9PAV3	NACA	-0.314192	0.16631
P05109	S100A8	-0.288306	0.167176
Q9UKQ2	ADAM28	0.379232	0.168269
P48745	CCN3	-0.298612	0.169186
Q6P0Q8	MAST2	0.376675	0.170064
O76096	CST7	-0.231529	0.170518
P80370	DLK1	-0.207137	0.170826
Q6X9E4	FBXW12	-0.26164	0.171055
O95084	PRSS23	0.232952	0.172002
Q9HBB8	CDHR5	-0.190171	0.172046
P15311	EZR	-0.481876	0.172171
P36896	ACVR1B	-0.30794	0.172196
Q96HY6	DDRGK1	-0.771376	0.172276
Q14002	CEACAM7	-0.235035	0.172951
Q92484	SMPDL3A	0.115839	0.173609
P07911	UMOD	-0.162683	0.174055
P00387	CYB5R3	-0.205073	0.174388
P21741	MDK	-0.350329	0.174707
O75150	RNF40	0.138418	0.175613
P05164	MPO	0.525269	0.175733
P05413	FABP3	0.175078	0.177156
O15467	CCL16	-0.203099	0.177719
P02750	LRG1	-0.153526	0.178002
P0DOX6		0.187549	0.178275
Q6Q788	APOA5	-0.409724	0.178485
Q8IUK8	CBLN2	0.246324	0.180107
P0C0L5	C4B	0.16438	0.180864
P11142	HSPA8	0.284264	0.181445
P01706	IGLV2-11	-0.210664	0.181542
A2NJV5	IGKV2-29	0.148221	0.184048
P29966	MARCKS	-0.228377	0.184545
P10124	SRGN	-0.233205	0.185867
P60606	CTXN1	0.0863753	0.185893
P10644	PRKAR1A	0.336404	0.18704
P0DP23;P0DP24;P0DP25	CALM1;CALM2;CALM3	0.342904	0.188721
P54753	EPHB3	0.393231	0.189267
Q16819	MEP1A	0.343781	0.189855
P27144	AK4	0.118431	0.190132
P12104	FABP2	0.227589	0.190459
Q13206	DDX10	0.283422	0.191769
Q8IUK5	PLXDC1	0.267384	0.193709
P37802	TAGLN2	-0.224911	0.193923
Q9H4A9	DPEP2	-0.215271	0.194133
Q5S007	LRRK2	0.283131	0.194138
Q13939	CCIN	-0.120329	0.195271
Q15020	SART3	-0.30848	0.195717
Q4G0P3	HYDIN	-0.618438	0.196235
P02675	FGB	0.136411	0.196393
P20962	PTMS	-0.222495	0.197701
Q15485	FCN2	0.263268	0.198463
P20742	PZP	0.303739	0.199407
P00533	EGFR	-0.207097	0.200058
P04003	C4BPA	0.175422	0.200394
Q93052	LPP	0.453184	0.200869
P15529	CD46	0.231204	0.201546
Q86UX2	ITIH5	-0.209979	0.203202
Q9NTU7	CBLN4	-0.134698	0.203813
P55774	CCL18	-0.134647	0.207112
O75037	KIF21B	0.0993086	0.207843
O00584	RNASET2	0.132272	0.207924
P12872	MLN	0.215693	0.209498
Q9UM22	EPDR1	0.539261	0.210059
P08294	SOD3	-0.230267	0.211616
P21399	ACO1	-0.337248	0.211832
Q15043	SLC39A14	-0.258866	0.211948
P05060	CHGB	0.19313	0.21223
P48357	LEPR	0.178252	0.213084
P05090	APOD	-0.166766	0.214614
P06276	BCHE	-0.142345	0.214711
P02679	FGG	0.131209	0.214931
Q14667	BLTP2	-0.349168	0.215343
Q99784	OLFM1	-0.216487	0.215695
P27695	APEX1	-0.196688	0.216136
Q9BRX9	WDR83	-0.281106	0.216645
O00299	CLIC1	0.716014	0.21675
P01709	IGLV2-8	0.53304	0.216845
P07737	PFN1	0.291296	0.216956
P35527	KRT9	-0.262861	0.218389
P51797	CLCN6	-0.196087	0.221059
Q9Y5Y7	LYVE1	0.170588	0.221367
O95969	SCGB1D2	-0.254304	0.221463
P13591	NCAM1	-0.182229	0.221864
A0A1W2PQ73	ERFL	-0.375292	0.22448
P16070	CD44	0.176668	0.225239
P04083	ANXA1	0.456027	0.225265
Q96DR5	BPIFA2	-0.373564	0.22527
O94759	TRPM2	-0.146372	0.226659
P02751	FN1	0.215383	0.226774
Q9HBW9	ADGRL4	0.12868	0.226795
Q86SQ4	ADGRG6	-0.166358	0.227836
P58335	ANTXR2	-0.332296	0.228481
Q9ULT8	HECTD1	-0.260419	0.229305
P06312	IGKV4-1	0.127759	0.231293
Q9NR12	PDLIM7	-0.229728	0.233114
Q15762	CD226	0.185801	0.233168
P25445	FAS	-0.231078	0.235489
Q9H8J5	MANSC1	0.187064	0.236677
Q07654	TFF3	-0.229306	0.236684
P53004	BLVRA	0.197579	0.237258
P23284	PPIB	0.286199	0.237702
Q9Y6R7	FCGBP	0.142365	0.238007
Q13442	PDAP1	-0.246678	0.238892
P14868	DARS1	0.195614	0.240044
Q9Y624	F11R	0.227211	0.241264
P46783	RPS10	-0.50448	0.241667
P60660	MYL6	0.437502	0.241853
Q9NUW8	TDP1	0.143269	0.242133
Q969E1	LEAP2	0.193827	0.242516
Q5VZ89	DENND4C	-0.328511	0.242825
P05026	ATP1B1	-0.251613	0.243239
P07333	CSF1R	-0.153254	0.244213
P01742	IGHV1-69	-0.1452	0.244677
P23528	CFL1	-0.236229	0.246249
Q96Q06	PLIN4	0.170993	0.247334
P15151	PVR	0.162859	0.247431
Q7Z3B1	NEGR1	0.15796	0.247949
Q5JXA9	SIRPB2	0.274014	0.248365
O00151	PDLIM1	-0.227039	0.250424
P40925	MDH1	0.395334	0.251252
P09493	TPM1	-0.282362	0.251516
P40189	IL6ST	0.168705	0.251588
Q14766	LTBP1	-0.202394	0.252982
P01824	IGHV4-39	-0.187328	0.253981
Q9NSC7	ST6GALNAC1	-0.240736	0.254386
Q16777;Q6FI13	H2AC20;H2AC18	0.277255	0.25519
Q9GZZ8	LACRT	0.425735	0.255738
Q5VU43;Q96SN8	PDE4DIP;CDK5RAP2	-0.134285	0.255772
P42702	LIFR	0.231465	0.256121
Q9Y6X6	MYO16	-0.26335	0.256304
P07108	DBI	-0.184714	0.258145
O00187	MASP2	0.191761	0.258496
P12273	PIP	-0.228029	0.259075
Q8NC54	KCT2	-0.297274	0.259673
P08779	KRT16	0.238888	0.259769
P24158	PRTN3	-0.159822	0.260777
P10720	PF4V1	-0.230077	0.261578
O94772	LY6H	0.21595	0.263128
Q9H2A7	CXCL16	-0.173669	0.263695
Q6ZMW2	ZNF782	-0.301791	0.264435
P13611	VCAN	-0.188162	0.264583
P43251	BTD	-0.165403	0.264991
P07910	HNRNPC	-0.542386	0.265117
Q9NQP4	PFDN4	0.407083	0.266873
P06731	CEACAM5	0.201647	0.267222
P04216	THY1	0.166512	0.26749
A0A075B6I9	IGLV7-46	-0.125744	0.269474
P43121	MCAM	0.166935	0.269719
Q9Y623	MYH4	-0.482538	0.269977
P02747	C1QC	0.163732	0.270979
Q15848	ADIPOQ	0.141522	0.271003
O43278	SPINT1	-0.192272	0.271325
P30050	RPL12	0.749944	0.272244
Q12796	PNRC1	-0.31283	0.2728
P20701	ITGAL	-0.220613	0.273449
P58062	SPINK7	0.193837	0.27372
P04075	ALDOA	-0.241372	0.274765
P21802	FGFR2	0.170799	0.274894
Q8IU68	TMC8	-0.757296	0.27556
A0A0B4J1V0	IGHV3-15	-0.101934	0.275928
P05062	ALDOB	-0.215146	0.276421
P01225	FSHB	0.162279	0.277711
O43768	ENSA	-0.238928	0.277855
P13796	LCP1	0.231606	0.278124
Q9ULZ3	PYCARD	-0.531575	0.280033
P11717	IGF2R	-0.247941	0.280108
A0A0C4DH33	IGHV1-24	0.129091	0.280401
P01042	KNG1	-0.160021	0.281809
P12883	MYH7	0.187864	0.282409
Q9Y2V2	CARHSP1	-0.293666	0.282632
Q6UXB8	PI16	-0.164885	0.28306
P00738	HP	-0.118166	0.283254
Q96IY4	CPB2	0.150421	0.28327
P17813	ENG	0.198628	0.284791
Q9ULI3	HEG1	0.141716	0.286408
P08123	COL1A2	-0.222272	0.286871
Q96DA0	ZG16B	-0.240302	0.286956
Q96PU8	QKI	0.121658	0.287261
Q9H299	SH3BGRL3	-0.224061	0.287323
P0DP58	LYNX1	0.268957	0.287604
P17936	IGFBP3	-0.138005	0.288191
Q07954	LRP1	-0.216507	0.289218
P02461	COL3A1	-0.199817	0.289458
Q86XH1	IQCA1	0.333079	0.289906
Q96DR8	MUCL1	0.169938	0.291995
P06732	CKM	-0.222396	0.292631
Q9C0C9	UBE2O	0.210796	0.292994
O14745	NHERF1	-0.276418	0.293186
P08581	MET	0.21676	0.293237
P01834	IGKC	0.150286	0.295724
Q8WZ42	TTN	0.158356	0.297552
P35247	SFTPD	0.102254	0.298115
Q9UPU5	USP24	0.197333	0.298268
A0A075B6J9	IGLV2-18	-0.110639	0.298707
P54727	RAD23B	-0.23375	0.298749
P36980	CFHR2	-0.0839891	0.299107
Q13740	ALCAM	0.162619	0.30051
P11279	LAMP1	0.128211	0.30097
Q86YD3	TMEM25	-0.182687	0.301094
Q15517	CDSN	-0.151368	0.301646
Q9NZK5	ADA2	0.450489	0.301653
P30041	PRDX6	0.266837	0.302029
Q8TCG5	CPT1C	-0.490811	0.302231
P01721	IGLV6-57	0.10059	0.30284
P02790	HPX	-0.148646	0.303188
P00734	F2	0.125583	0.30389
Q9H2X3	CLEC4M	0.110797	0.305028
P10599	TXN	-0.202915	0.305226
P22105	TNXB	-0.206373	0.30727
P51884	LUM	-0.130297	0.307669
P0DTE1	IGHV3-38-3	0.165005	0.309619
P10451	SPP1	-0.189699	0.310676
P02788	LTF	0.115233	0.311557
Q13416	ORC2	-0.413636	0.312037
P61978	HNRNPK	-0.379081	0.312443
A0A0C4DH29	IGHV1-3	0.153583	0.312722
P20827	EFNA1	0.226058	0.313374
P01782;P0DP04	IGHV3-9;IGHV3-43D	0.127923	0.314258
A0A0C4DH67	IGKV1-8	0.130212	0.314534
Q7Z6M3	MILR1	0.235675	0.318216
P68371	TUBB4B	0.317269	0.318474
P0DJI8	SAA1	-0.16272	0.3193
P78527	PRKDC	0.192486	0.320774
P80108	GPLD1	-0.119602	0.322086
P20290	BTF3	-0.319065	0.322923
Q9Y5Q6	INSL5	-0.443956	0.325154
P06744	GPI	-0.83196	0.325958
P19827	ITIH1	0.107655	0.327458
Q9UKJ1	PILRA	-0.142432	0.327902
P61204;P84077	ARF3;ARF1	-0.402582	0.329284
Q5D862	FLG2	0.198588	0.330299
P01871	IGHM	0.162288	0.3324
Q9UJC5	SH3BGRL2	-0.200469	0.332788
P31431	SDC4	0.193252	0.335731
A0A1B0GTC6	C3orf85	0.199374	0.336452
P02585	TNNC2	-0.23309	0.337276
Q03591	CFHR1	0.0758373	0.337568
P68133	ACTA1	-0.225274	0.338842
O75339	CILP	-0.223249	0.339216
P15169	CPN1	0.149687	0.339564
A0A0C4DH43	IGHV2-70D	-0.132616	0.339995
O43915	VEGFD	0.179304	0.341073
P68104;Q5VTE0	EEF1A1;EEF1A1P5	-0.194374	0.341344
Q9UBG3	CRNN	0.373443	0.342461
Q07075	ENPEP	0.20609	0.343064
Q13443	ADAM9	-0.198996	0.343267
Q9H425	C1orf198	-0.464565	0.343786
P83731	RPL24	-0.27598	0.343881
P01023	A2M	0.110988	0.344352
P07357	C8A	0.115615	0.345886
Q86TH1	ADAMTSL2	-0.389571	0.34594
P28300	LOX	-0.18497	0.346341
Q8WXD2	SCG3	0.248961	0.346528
P01599	IGKV1-17	0.127861	0.346872
P08697	SERPINF2	-0.134243	0.346874
P01033	TIMP1	-0.203296	0.347591
A0A0C4DH31	IGHV1-18	0.160069	0.347768
Q9UIB8	CD84	0.204238	0.348212
O43909	EXTL3	0.372029	0.348367
Q96P63	SERPINB12	0.26153	0.349127
O76061	STC2	-0.203878	0.349425
P35609	ACTN2	-0.671849	0.3513
Q9NY97	B3GNT2	-0.156815	0.351617
P02042	HBD	-0.200144	0.351648
Q13508	ART3	-0.141311	0.351728
P08571	CD14	-0.129311	0.352421
P43652	AFM	-0.128018	0.352508
A0A087WSY6	IGKV3D-15	0.101897	0.352818
P51858	HDGF	-0.221405	0.352958
Q9NS62	THSD1	0.202448	0.355025
Q8NI60	COQ8A	0.144917	0.355473
P07305	H1-0	-0.279981	0.355713
P13797	PLS3	0.354941	0.35624
Q12802	AKAP13	0.217313	0.357992
A0M8Q6	IGLC7	-0.186069	0.358729
Q9BQB4	SOST	0.250153	0.359369
Q99459	CDC5L	0.130103	0.359643
Q8TD46	CD200R1	-0.191956	0.360146
Q7Z404	TMC4	0.193165	0.360242
Q9NQ76	MEPE	-0.155472	0.360459
P04792	HSPB1	-0.281773	0.361638
Q06830	PRDX1	0.232595	0.361948
P35611	ADD1	-0.27266	0.363126
P05362	ICAM1	-0.111712	0.364539
P06727	APOA4	0.0897173	0.364694
Q96NZ9	PRAP1	0.0932301	0.364824
P20700	LMNB1	0.280582	0.365868
Q5U5Z8	AGBL2	-0.353653	0.366792
P80511	S100A12	0.222384	0.366879
Q8IYJ0	PIANP	0.237365	0.367765
P16234	PDGFRA	0.191828	0.370083
P01764	IGHV3-23	-0.15096	0.371832
P01767	IGHV3-53	-0.177387	0.372778
Q9NRA1	PDGFC	0.259171	0.372985
P05067	APP	-0.160078	0.373259
Q14982	OPCML	0.138391	0.37386
P11171	EPB41	-0.221467	0.373933
Q9NS71	GKN1	-0.137285	0.374281
P01031	C5	0.102035	0.374699
O43493	TGOLN2	0.139024	0.374742
P04080	CSTB	0.299303	0.377577
P12111	COL6A3	0.143009	0.379502
Q8TDL5	BPIFB1	-0.108725	0.380164
O00483	NDUFA4	-0.107598	0.380423
Q9NY72	SCN3B	0.271405	0.382013
Q86YZ3	HRNR	0.218711	0.382875
P56199	ITGA1	0.112384	0.383544
P49006	MARCKSL1	0.191794	0.383755
P01619	IGKV3-20	0.11591	0.383819
Q96FE7	PIK3IP1	0.150441	0.385338
Q13409	DYNC1I2	0.188408	0.389627
O75096	LRP4	-0.213836	0.389636
P0DMQ5	INAFM2	-0.164571	0.390329
Q8IW75	SERPINA12	0.214215	0.390632
Q92626	PXDN	0.154854	0.39165
O95727	CRTAM	-0.26109	0.392616
P63167	DYNLL1	-0.435313	0.392969
P35555	FBN1	0.157086	0.393304
P01008	SERPINC1	-0.116375	0.394485
A0A087WSY4	IGHV4-30-2	0.140627	0.394496
P02545	LMNA	0.2789	0.395318
P61224	RAP1B	-0.223988	0.395593
P27482	CALML3	-0.266016	0.396619
Q08188	TGM3	0.216439	0.397539
P00450	CP	0.0859778	0.397644
P06396	GSN	0.0938588	0.398558
O95803;Q9H3R1	NDST3;NDST4	-0.158899	0.398979
P00739	HPR	-0.092695	0.399357
Q9HAU5	UPF2	-0.184077	0.400799
Q9NP84	TNFRSF12A	0.142402	0.40191
P05186	ALPL	-0.176929	0.401921
Q58FF3	HSP90B2P	-0.17313	0.402142
Q9HDB5;Q9Y4C0	NRXN3	-0.482951	0.402223
Q9UK76	JPT1	-0.20521	0.403857
P19823	ITIH2	0.0827728	0.403908
P61960	UFM1	-0.147057	0.404051
Q86TY3	ARMH4	0.140796	0.404289
Q9BUD6	SPON2	-0.191984	0.404516
P23327	HRC	0.135345	0.404843
P15502	ELN	-0.143743	0.405145
P08519	LPA	-0.0975498	0.408397
Q13103	SPP2	-0.15648	0.408508
Q96F85	CNRIP1	0.312181	0.408689
P01714	IGLV3-19	-0.0869254	0.40922
P07225	PROS1	-0.113325	0.409225
P01768;P0DP03	IGHV3-30;IGHV3-30-5	0.118895	0.411517
Q9UPQ4	TRIM35	-0.141772	0.412274
Q96EP5	DAZAP1	0.40125	0.412709
Q16363	LAMA4	0.186837	0.413431
O15240	VGF	0.148642	0.414067
Q9NNX6	CD209	-0.184373	0.414124
Q9BYH1	SEZ6L	0.255087	0.414479
Q9GZT6	CCDC90B	-0.154765	0.415199
P01715	IGLV3-1	-0.0772877	0.415301
P0DOX7		0.103121	0.419175
Q6FHJ7	SFRP4	-0.146629	0.419926
Q4ZHG4	FNDC1	0.200211	0.420922
A0A0C4DH41;P01825	IGHV4-61;IGHV4-59	-0.142226	0.422159
P40121	CAPG	-0.406423	0.425276
P08887	IL6R	-0.158708	0.4253
O14960	LECT2	0.124197	0.426376
P32971	TNFSF8	0.257747	0.428114
P45877	PPIC	0.20193	0.428575
P35908	KRT2	0.144693	0.430834
P13645	KRT10	0.142767	0.431299
P01860	IGHG3	0.0903614	0.431393
P02743	APCS	-0.101717	0.432628
P00488	F13A1	0.160746	0.43277
P28827	PTPRM	0.0927341	0.432801
Q9NQ38	SPINK5	-0.128282	0.433874
P52799	EFNB2	0.170169	0.434216
Q9UEW3	MARCO	0.146596	0.434398
P01859	IGHG2	0.099347	0.435588
O43866	CD5L	0.112402	0.43597
Q9P2N6	KANSL3	0.395341	0.436077
O75368	SH3BGRL	-0.157369	0.436111
Q13308	PTK7	-0.17273	0.43624
Q8N7A1	KLHDC1	-0.112499	0.436984
Q9BXX0	EMILIN2	0.157278	0.437352
Q96EH3	MALSU1	-0.134755	0.439136
O15204	ADAMDEC1	-0.12536	0.439864
P04085	PDGFA	-0.103033	0.440093
Q14520	HABP2	0.119872	0.441147
Q15262	PTPRK	-0.200507	0.44225
P11047	LAMC1	-0.18347	0.442451
P55773	CCL23	-0.186232	0.442967
Q9Y2G1	MYRF	-0.133774	0.443072
P01743	IGHV1-46	0.113694	0.44478
P53999	SUB1	0.172721	0.445327
O14498	ISLR	0.18886	0.445528
O76070	SNCG	0.138584	0.445633
P80723	BASP1	-0.114323	0.446256
P26992	CNTFR	-0.138203	0.446379
Q15166	PON3	0.124175	0.446961
P26583	HMGB2	-0.420184	0.447122
P55290	CDH13	0.106122	0.447613
P16150	SPN	0.268046	0.447798
Q96B86	RGMA	0.167012	0.448803
Q8IW19	APLF	-0.141777	0.451046
P32926	DSG3	0.158497	0.452688
Q96A32	MYL11	-0.228451	0.4527
Q9BRK5	SDF4	0.136755	0.453726
P03950	ANG	0.131824	0.453845
Q8NHY3	GAS2L2	-0.167674	0.45534
P01833	PIGR	-0.0801802	0.455754
Q9NQU5	PAK6	-0.0472264	0.456022
P40926	MDH2	-0.286404	0.456095
P62750	RPL23A	0.258299	0.456471
Q6UWT4	C5orf46	0.257311	0.45807
Q02818	NUCB1	-0.149268	0.459167
P63241	EIF5A	-0.351616	0.459901
P40967	PMEL	-0.149518	0.460735
P11597	CETP	-0.147868	0.46199
Q06033	ITIH3	0.0961442	0.46404
Q9Y4L1	HYOU1	-0.152971	0.464113
A0A0B4J1V1	IGHV3-21	-0.0847504	0.465002
P04275	VWF	-0.196432	0.465556
Q8IVN3	MUSTN1	-0.18098	0.466332
Q9BZC7	ABCA2	-0.179924	0.466736
P13671	C6	-0.0819649	0.467861
P30043	BLVRB	-0.158446	0.468916
Q8WWZ8	OIT3	0.167878	0.469313
Q93034	CUL5	-0.142717	0.470089
P22352	GPX3	0.101179	0.470752
A0A075B6P5;P01615	IGKV2-28;IGKV2D-28	0.103204	0.471628
Q9UJW2	TINAG	0.179096	0.471876
Q9H6X2	ANTXR1	0.258693	0.472011
P14207	FOLR2	-0.110711	0.473074
P00558	PGK1	0.191561	0.473362
P04278	SHBG	0.0964222	0.475823
P69905	HBA1	-0.151398	0.476621
P69891	HBG1	-0.147157	0.478593
P16401	H1-5	-0.111121	0.480269
P07360	C8G	-0.108889	0.481417
Q01658	DR1	-0.841841	0.483011
O15335	CHAD	-0.0803066	0.483302
P35900	KRT20	0.22368	0.483795
Q03405	PLAUR	0.152138	0.484808
Q8TEA8	DTD1	0.196742	0.486629
Q96J42	TXNDC15	0.127043	0.487062
P05976	MYL1	-0.159079	0.48711
Q9ULC6	PADI1	-0.0684752	0.48726
P01766	IGHV3-13	-0.0797853	0.487411
Q6JQN1	ACAD10	0.0959531	0.487621
P23588	EIF4B	0.213969	0.488293
P10606	COX5B	-0.377955	0.488405
Q15063	POSTN	-0.121098	0.489079
Q8IYS5	OSCAR	-0.102943	0.4893
Q96HC4	PDLIM5	-0.1356	0.489392
Q96H15	TIMD4	-0.0935755	0.489747
P51888	PRELP	-0.137155	0.490198
P02787	TF	0.0727593	0.491083
Q8NDA2	HMCN2	0.102138	0.491781
Q8N114	SHISA5	0.148844	0.492122
Q96MU8	KREMEN1	-0.159237	0.492645
P12830	CDH1	0.0906842	0.493071
P31151	S100A7	-0.143748	0.493159
P51149	RAB7A	-0.292252	0.493236
P55854;P61956;Q6EEV6	SUMO3;SUMO2;SUMO4	-0.14926	0.494228
Q8N9V7	TOPAZ1	0.0945809	0.49453
Q14118	DAG1	-0.103452	0.494898
Q9H4L5	OSBPL3	-0.10405	0.494986
Q9C0I3	CCSER1	-0.164369	0.49637
Q3SY84	KRT71	0.214434	0.496657
Q9UBE0	SAE1	0.111404	0.496703
Q9UNF0	PACSIN2	0.170864	0.497053
P35754	GLRX	-0.139525	0.49707
Q7Z3E2	CCDC186	0.168945	0.497661
P39060	COL18A1	0.126346	0.49801
P48960	ADGRE5	-0.120078	0.498151
Q6UX27	VSTM1	-0.134042	0.498838
P60022	DEFB1	-0.10426	0.498955
P37840	SNCA	-0.140275	0.499018
P80188	LCN2	0.109694	0.500437
Q92824	PCSK5	0.124935	0.501012
Q562R1	ACTBL2	0.178025	0.50132
Q8N386	LRRC25	0.118249	0.50187
Q8WUH6	TMEM263	-0.280889	0.502262
P13639	EEF2	0.312919	0.50289
Q8TCA0	LRRC20	-0.183758	0.503392
Q14847	LASP1	-0.136772	0.503932
Q08043	ACTN3	0.209284	0.504224
Q96KN2	CNDP1	0.0868777	0.505769
Q9Y646	CPQ	0.150853	0.505846
P13521	SCG2	-0.182857	0.506583
A0A075B6K5	IGLV3-9	-0.0886401	0.507034
P17181	IFNAR1	0.135471	0.50744
Q02223	TNFRSF17	-0.114387	0.507874
Q96AQ6	PBXIP1	-0.159884	0.508008
O43653	PSCA	0.0837116	0.508277
O75015	FCGR3B	-0.0504267	0.510392
P61019	RAB2A	-0.410874	0.510466
P0C0L4	C4A	0.0649298	0.510507
P14923	JUP	0.188754	0.512425
P06331	IGHV4-34	-0.0907244	0.512978
Q9H4B7	TUBB1	-0.151846	0.513392
A1L4H1	SSC5D	-0.135055	0.513539
P05787	KRT8	0.0995968	0.514402
Q14767	LTBP2	0.08632	0.515697
P51397	DAP	-0.156054	0.515824
P0DTE7;P0DTE8;P0DUB6	AMY1B;AMY1C;AMY1A	-0.165419	0.515995
Q8TBP5	FAM174A	0.140886	0.515998
Q6UW78	UQCC3	-0.314701	0.516002
O43237	DYNC1LI2	-0.157814	0.516443
Q01469	FABP5	-0.0869479	0.516648
P07477	PRSS1	0.0930303	0.517354
P13501	CCL5	-0.166308	0.517808
P00747	PLG	0.0658938	0.518124
P02511	CRYAB	-0.316265	0.51827
P49796	RGS3	-0.162748	0.518926
Q08397	LOXL1	-0.102763	0.519523
Q9H4F8	SMOC1	0.151987	0.519922
O00471	EXOC5	0.209194	0.520069
P10646	TFPI	-0.139018	0.521671
A0A0A0MT89	IGKJ1	0.0631269	0.521953
Q6UXI7	VIT	-0.125543	0.522378
A0A0C4DH25	IGKV3D-20	0.077647	0.522548
P13929	ENO3	-0.166969	0.523853
Q14126	DSG2	0.104152	0.523996
P04259	KRT6B	0.135383	0.524484
O43399	TPD52L2	0.249758	0.524691
A0A0B4J1Y8	IGLV9-49	0.0831208	0.525794
P56211	ARPP19	-0.219258	0.526877
O43692	PI15	0.189371	0.528902
P14618	PKM	0.174117	0.529675
Q8IWV2	CNTN4	0.10591	0.531136
P04430	IGKV1-16	0.153411	0.532578
Q15293	RCN1	0.182048	0.53318
P11362	FGFR1	0.088534	0.535713
Q04118	PRB3	0.123986	0.537639
Q92520	FAM3C	-0.277047	0.538684
P81605	DCD	0.111375	0.538829
Q86WI1	PKHD1L1	-0.236709	0.538905
P23471	PTPRZ1	-0.0882582	0.541686
P52789	HK2	0.120344	0.542784
P01019	AGT	0.0678315	0.543218
P09326	CD48	-0.0882727	0.543688
P50991	CCT4	0.228216	0.544965
P62826	RAN	-0.176078	0.545147
O14983	ATP2A1	-0.176512	0.545256
A0A0C4DH36	IGHV3-38	0.0898744	0.546348
P10645	CHGA	0.101779	0.546835
P08493	MGP	0.103812	0.54836
P78539	SRPX	-0.123186	0.548678
Q9NPH3	IL1RAP	0.0570723	0.549051
O95450	ADAMTS2	0.108117	0.549083
Q9BQ51	PDCD1LG2	-0.0683899	0.549307
P68871	HBB	-0.126882	0.549959
P02768	ALB	0.0611687	0.551359
Q9UK55	SERPINA10	-0.0822346	0.552484
Q9BZD6	PRRG4	-0.127285	0.553115
O43405	COCH	-0.221725	0.553977
Q9NR99	MXRA5	0.0973771	0.554176
P36957	DLST	0.138728	0.555287
P21583	KITLG	0.120827	0.555298
P19652	ORM2	-0.0919881	0.555717
P02671	FGA	0.103912	0.556194
A0A075B6S2	IGKV2D-29	0.0674523	0.556912
Q14956	GPNMB	-0.083796	0.558348
P22692	IGFBP4	-0.0890095	0.558756
Q3ZCW2	LGALSL	-0.153955	0.560044
P02647	APOA1	0.0747807	0.560345
P15814	IGLL1	0.0747447	0.562404
P08253	MMP2	-0.121083	0.563857
Q9HCN6	GP6	0.119814	0.564496
P61604	HSPE1	-0.132958	0.564504
Q04721	NOTCH2	-0.0980776	0.564596
Q6YHK3	CD109	-0.060357	0.564948
A0A0B4J1X8	IGHV3-43	0.0629912	0.565256
Q7KYR7;Q8WVV5	BTN2A1;BTN2A2	0.129137	0.567154
Q15746	MYLK	0.143169	0.567498
P21757	MSR1	0.109115	0.569254
P02656	APOC3	-0.0522572	0.57603
Q9NQC3	RTN4	-0.108645	0.576099
Q96BQ1	FAM3D	-0.321791	0.576981
P19438	TNFRSF1A	0.123077	0.577161
Q9Y4P8	WIPI2	0.103287	0.577759
A0A0C4DH35	IGHV3-35	0.093403	0.577892
Q99952	PTPN18	-0.194295	0.577913
Q16627	CCL14	0.0943128	0.578574
P04004	VTN	-0.0639451	0.578632
Q8TD30	GPT2	0.108104	0.579018
P09958	FURIN	-0.118355	0.580437
Q9NP87	POLM	0.347446	0.581085
Q8N1N4	KRT78	0.160819	0.581317
Q59H18	TNNI3K	-0.102315	0.583283
A0A0B4J1V6	IGHV3-73	0.0848868	0.584109
P24592	IGFBP6	-0.0888222	0.584908
P00441	SOD1	-0.105884	0.585754
A0A075B6S6	IGKV2D-30	0.0726375	0.587581
Q9NZT1	CALML5	-0.111326	0.587706
P02786	TFRC	0.122194	0.588876
O15117	FYB1	-0.137857	0.588887
P00740	F9	-0.0706589	0.589657
P27487	DPP4	-0.0815322	0.590545
Q01082	SPTBN1	0.12242	0.590899
P20061	TCN1	0.0738067	0.590956
Q9NP80	PNPLA8	0.0857942	0.591005
A0A0C4DH38	IGHV5-51	-0.0651238	0.59106
Q9Y5C1	ANGPTL3	-0.116131	0.591243
Q13790	APOF	0.0691018	0.591375
P16403	H1-2	-0.115373	0.59359
Q86XI8	ZSWIM9	0.0750813	0.594197
Q9UEY8	ADD3	-0.10528	0.595068
P14209	CD99	-0.100919	0.595098
Q9UEE5	STK17A	-0.105572	0.59634
Q5DT21	SPINK9	0.137827	0.597506
Q9ULK6	RNF150	0.215367	0.597699
P05089	ARG1	0.127494	0.5977
P20023	CR2	-0.0630518	0.598087
O00175	CCL24	0.0496407	0.598881
Q9UBX1	CTSF	-0.0942764	0.599823
Q02878	RPL6	0.185895	0.599914
P54289	CACNA2D1	0.0580163	0.600095
Q5TD97	FHL5	-0.101873	0.600687
Q92619	ARHGAP45	0.150755	0.60154
P20810	CAST	0.102302	0.601963
Q92797	SYMPK	-0.0964318	0.602681
O15381	NVL	0.109158	0.60334
Q12913	PTPRJ	0.0759188	0.603471
Q9Y5Q9	GTF3C3	0.121135	0.604589
P42166;P42167	TMPO	0.307032	0.604672
A0A075B6K4	IGLV3-10	0.0439262	0.605592
P12882	MYH1	-0.105483	0.605632
O75023	LILRB5	-0.0600578	0.606426
Q9UK12	ZNF222	-0.132344	0.606435
Q15942	ZYX	-0.104573	0.606595
P04180	LCAT	0.071798	0.607463
P02810	PRH1	-0.0841872	0.607776
P78552	IL13RA1	-0.0844115	0.60966
P10747	CD28	0.13859	0.610232
P67936	TPM4	0.140572	0.611236
A0A0B4J1U7	IGHV6-1	0.0518527	0.61172
Q9H0E2	TOLLIP	0.191878	0.61213
Q02952	AKAP12	-0.111009	0.612277
Q9P2X0	DPM3	-0.125199	0.612732
P01817	IGHV2-5	0.0768187	0.613011
A0A0C4DH55	IGKV3D-7	0.0411738	0.613094
Q9NPY3	CD93	-0.113096	0.613868
P00451	F8	0.09354	0.614273
A0A0B4J1X5	IGHV3-74	0.0688965	0.617455
Q86U17	SERPINA11	0.143629	0.618166
Q99941	ATF6B	-0.0714694	0.618993
P08637	FCGR3A	-0.0526209	0.620045
Q99518	FMO2	0.120913	0.620294
P02458	COL2A1	-0.119759	0.623337
P80748	IGLV3-21	0.0771183	0.624244
O75783	RHBDL1	0.354654	0.624632
O95445	APOM	-0.0685522	0.626117
Q9H8W5	TRIM45	-0.0740758	0.626258
Q6GPI1	CTRB2	-0.0503628	0.626927
Q92887	ABCC2	-0.135073	0.630384
Q13061	TRDN	-0.261526	0.630404
A0A0A0MS15	IGHV3-49	0.0602576	0.631319
P78324	SIRPA	-0.0714867	0.631337
Q9UBX5	FBLN5	0.129456	0.632201
P13497	BMP1	0.102383	0.633092
Q13332	PTPRS	0.208866	0.634323
P29508	SERPINB3	-0.102371	0.6348
P0DOY3	IGLC3	0.0737387	0.635391
P61769	B2M	-0.0868692	0.635811
P08567	PLEK	-0.180189	0.637178
Q9NZT2	OGFR	0.193977	0.638342
P13473	LAMP2	-0.060637	0.639978
Q86VV8	RTTN	-0.126536	0.640029
Q5VT25	CDC42BPA	-0.0823579	0.640324
P33908	MAN1A1	0.106662	0.640899
P10321	HLA-C	0.16604	0.641444
Q15582	TGFBI	0.0974077	0.641845
P05451	REG1A	0.0696318	0.642382
O00451	GFRA2	-0.103013	0.644441
P62805	H4C1	-0.115678	0.64458
A0A0C4DH73;P01597;P01611;P04432	IGKV1-12;IGKV1-39;IGKV1D-12;IGKV1D-39	0.0712266	0.64469
P04406	GAPDH	-0.101851	0.644763
Q8NFL0	B3GNT7	-0.101402	0.645053
P26718	KLRK1	-0.10109	0.645081
P02533	KRT14	-0.0849477	0.647036
P30101	PDIA3	0.236571	0.650417
Q9NQ79	CRTAC1	0.154836	0.650419
P0DOX8		0.0720076	0.650639
P02760	AMBP	-0.077841	0.651084
P21359	NF1	0.079048	0.652652
Q9Y279	VSIG4	-0.0894969	0.653532
P00918	CA2	-0.0964782	0.654718
P16109	SELP	-0.0697347	0.65513
P11169	SLC2A3	0.126187	0.655182
Q5ZPR3	CD276	-0.0900905	0.656167
P02766	TTR	-0.0833162	0.659957
P42081	CD86	-0.0781897	0.659978
P25815	S100P	0.0758629	0.660116
Q14432	PDE3A	-0.15612	0.661099
Q9C0E2	XPO4	0.0870502	0.661256
P01717	IGLV3-25	-0.0524276	0.66231
P35318	ADM	0.072903	0.662716
Q8IWU5	SULF2	-0.0790744	0.663403
P35030	PRSS3	0.0782558	0.663439
P09603	CSF1	-0.0903703	0.663439
Q969Z4	RELT	0.12957	0.664582
O75144	ICOSLG	-0.0615693	0.665425
P18827	SDC1	-0.0888896	0.665822
Q8WXH0	SYNE2	-0.0940174	0.666973
P62424	RPL7A	-0.0957297	0.667696
P04233	CD74	0.0922395	0.667729
P78417	GSTO1	-0.233804	0.668828
P40199	CEACAM6	-0.0757482	0.669612
Q9UQ49	NEU3	-0.102597	0.669653
P37173	TGFBR2	0.0884739	0.670655
Q96S96	PEBP4	-0.0805961	0.670805
P16112	ACAN	-0.0641511	0.67106
P07355	ANXA2	0.104723	0.671216
P31947	SFN	0.115373	0.67167
O00585	CCL21	0.108447	0.671759
P01700	IGLV1-47	-0.0463961	0.672031
P28799	GRN	-0.0801793	0.672449
Q9Y490	TLN1	-0.0956716	0.672853
Q9Y4R8	TELO2	-0.103596	0.674295
P07339	CTSD	-0.0560505	0.675142
Q6QNK2	ADGRD1	0.0807037	0.675868
P07311	ACYP1	0.0906981	0.67752
P02538	KRT6A	0.0756661	0.678517
Q8N8K9	KIAA1958	-0.0351381	0.67872
P02753	RBP4	0.0549063	0.681059
A0A0B4J1Y9	IGHV3-72	-0.0534951	0.683342
Q16610	ECM1	0.0400127	0.68341
O95817	BAG3	0.088901	0.686405
Q6KB66	KRT80	0.123123	0.68732
Q16378	PRR4	0.0395905	0.687452
P26927	MST1	0.0984691	0.687557
P31949	S100A11	0.0737187	0.687674
Q15113	PCOLCE	-0.0638163	0.687898
Q6EMK4	VASN	-0.068613	0.689157
P17927	CR1	0.0699064	0.68933
O75093	SLIT1	-0.0668894	0.68976
P02724	GYPA	0.0831955	0.690316
P41222	PTGDS	0.0625712	0.692084
O60883	GPR37L1	-0.0801451	0.693012
Q13683	ITGA7	0.076549	0.693614
Q9Y5Y9	SCN10A	-0.0608157	0.69463
P06748	NPM1	-0.0865921	0.695221
P17900	GM2A	0.0644466	0.695817
P78423	CX3CL1	-0.0908795	0.695943
P26038	MSN	-0.113428	0.696311
Q16270	IGFBP7	0.070365	0.696386
A0A075B6I3	IGLV11-55	-0.132183	0.697099
Q6UX71	PLXDC2	0.0603928	0.697487
Q16620	NTRK2	0.078375	0.697528
P22735	TGM1	0.126161	0.698859
Q0ZGT2	NEXN	0.0948348	0.700158
P01701	IGLV1-51	0.0286229	0.701714
Q03111	MLLT1	-0.0884608	0.703021
Q9NS23	RASSF1	-0.0620004	0.703392
P02792	FTL	-0.128505	0.703479
P25705	ATP5F1A	0.126338	0.703645
Q96QR1	SCGB3A1	-0.059476	0.705971
Q12841	FSTL1	-0.0685052	0.706222
P05408	SCG5	-0.0671799	0.707195
Q9Y2T4	PPP2R2C	0.101678	0.708386
Q9UKY7	CDV3	-0.0925242	0.709308
Q16651	PRSS8	0.0696248	0.711248
Q6ZMJ2	SCARA5	0.0691859	0.711589
P48061	CXCL12	-0.0791835	0.712396
Q8TCZ2	CD99L2	0.0809302	0.712653
Q8WW12	PCNP	-0.103583	0.713352
O95998	IL18BP	0.0607246	0.713434
Q13477	MADCAM1	0.149972	0.714733
Q03403	TFF2	-0.0607709	0.715562
P08217	CELA2A	-0.0944272	0.715702
O00468	AGRN	0.0587855	0.717159
P05114	HMGN1	0.110847	0.717849
P49908	SELENOP	-0.0704756	0.718094
P15144	ANPEP	0.0733928	0.718138
P35237	SERPINB6	-0.0574389	0.718523
Q9NZ38	IDI2-AS1	-0.0276323	0.719385
Q6IFN5	OR7E24	-0.0670492	0.721514
Q9BY67	CADM1	0.054388	0.722311
P02775	PPBP	-0.0732166	0.723522
Q9HDC9	APMAP	0.06986	0.723942
P27169	PON1	0.0514808	0.724002
P26373	RPL13	0.116839	0.725356
P0DP01	IGHV1-8	-0.0352461	0.726343
P22891	PROZ	-0.0391813	0.727693
P0DOX3		-0.0433977	0.728292
Q96PD5	PGLYRP2	0.0390935	0.729718
Q14242	SELPLG	0.0689393	0.730558
Q9NS28	RGS18	0.11843	0.730723
Q99650	OSMR	-0.0558998	0.731538
P62263	RPS14	0.0866713	0.732322
P04054	PLA2G1B	-0.0608739	0.732381
P50502;Q8IZP2	ST13;ST13P4	-0.145328	0.732496
Q6E0U4	DMKN	-0.0567327	0.732747
P28906	CD34	0.0749343	0.733211
Q9Y2R0	COA3	0.132268	0.733242
O94966	USP19	0.0456132	0.733926
Q9UNW1	MINPP1	-0.103449	0.734616
Q9H4X1	RGCC	-0.152105	0.735196
Q9UBG0	MRC2	-0.0802906	0.735543
Q86UN3	RTN4RL2	-0.09394	0.735772
P02745	C1QA	-0.0494118	0.736533
P01861	IGHG4	0.0239577	0.737093
P56159	GFRA1	-0.0843782	0.73874
O00391	QSOX1	0.0645504	0.741317
Q96RQ1	ERGIC2	-0.0839325	0.741354
P36955	SERPINF1	0.037091	0.743639
P0DMV8;P0DMV9	HSPA1A;HSPA1B	0.148059	0.744257
P63313	TMSB10	0.0651634	0.745283
P02763	ORM1	-0.0588458	0.746129
Q6JBY9	RCSD1	-0.0719523	0.747877
P0DP08	IGHV4-38-2	-0.0536869	0.748399
Q96PL1	SCGB3A2	0.0597062	0.749025
P14621	ACYP2	0.0618075	0.749982
P01732	CD8A	-0.0597335	0.751244
Q12866	MERTK	-0.045473	0.751465
O60911	CTSV	0.0653836	0.752529
O43707	ACTN4	-0.0687756	0.752741
O75347	TBCA	-0.0694333	0.752811
P02144	MB	0.0480005	0.753306
P32942	ICAM3	-0.041567	0.754806
Q12860	CNTN1	-0.0428628	0.754841
A0A075B6I0	IGLV8-61	0.0196602	0.754973
P16284	PECAM1	0.0473358	0.75523
Q13439	GOLGA4	0.116875	0.757454
Q8N3J6	CADM2	0.0692856	0.758046
P17677	GAP43	0.155366	0.758255
P10412	H1-4	-0.0666551	0.758278
P08575	PTPRC	-0.035395	0.759846
Q92496	CFHR4	-0.0351635	0.759934
P15941	MUC1	-0.0440824	0.760688
Q2VWP7	PRTG	-0.0879012	0.761057
P23435	CBLN1	-0.046569	0.761383
P13727	PRG2	-0.109688	0.762751
P01814	IGHV2-70	-0.0348597	0.764579
O15394	NCAM2	0.042207	0.765007
Q05209	PTPN12	0.124028	0.765473
P14151	SELL	-0.0390339	0.765822
P04196	HRG	-0.00904196	0.766155
Q92686	NRGN	-0.102271	0.766272
P07996	THBS1	-0.0632775	0.768798
Q6UVK1	CSPG4	-0.0689995	0.769173
Q06418	TYRO3	0.0497838	0.769911
P03952	KLKB1	-0.0368936	0.769918
O95810	CAVIN2	-0.0617154	0.76999
O60762	DPM1	0.0885476	0.770295
Q8TD26	CHD6	0.067061	0.770301
Q0D2I5;Q5TF58	IFFO1;IFFO2	0.0576526	0.770527
P52306	RAP1GDS1	-0.158422	0.77074
Q8IZP9	ADGRG2	0.0510977	0.770794
Q9UBX7	KLK11	-0.0560652	0.771002
Q9NPF0	CD320	0.0608453	0.77202
P32119	PRDX2	0.0711087	0.772286
P0DOX5		0.0393621	0.773141
Q8IZF2	ADGRF5	-0.0358369	0.774392
P06753	TPM3	-0.0731817	0.775657
P02776	PF4	-0.0566689	0.775713
P04040	CAT	0.06829	0.775891
Q9Y2I9	TBC1D30	-0.0531666	0.776012
P07478	PRSS2	-0.047319	0.776495
P12259	F5	-0.0437737	0.777898
O60667	FCMR	0.0685176	0.777902
Q93070	ART4	0.034563	0.77812
P13598	ICAM2	0.0363682	0.778308
P05546	SERPIND1	0.0388496	0.778604
P69892	HBG2	-0.0698502	0.779113
O95867	LY6G6C	0.0652553	0.779765
Q16849	PTPRN	-0.0854813	0.780182
O95980	RECK	0.0511006	0.781312
O14974	PPP1R12A	-0.0814725	0.781683
Q16663	CCL15	-0.0526244	0.782135
P02655	APOC2	-0.0299786	0.784564
P45378	TNNT3	-0.0810231	0.785447
Q5T2D2	TREML2	-0.0428452	0.785567
Q14624	ITIH4	-0.0385925	0.786881
Q08495	DMTN	0.0662803	0.787308
P19013	KRT4	-0.0876363	0.788368
P06870	KLK1	0.0248862	0.788377
Q9UKX2	MYH2	-0.0840408	0.789984
Q09666	AHNAK	-0.0440455	0.791578
P04211	IGLV7-43	0.0359585	0.792627
P16035	TIMP2	0.0555605	0.793574
P12110	COL6A2	0.0616592	0.794409
P09871	C1S	-0.0303802	0.795959
Q92820	GGH	0.0322698	0.79646
P07237	P4HB	-0.0760405	0.796678
Q14203	DCTN1	0.0871847	0.797949
Q08ET2	SIGLEC14	-0.0641597	0.797975
Q10588	BST1	0.0269663	0.798374
P61626	LYZ	0.0405931	0.798509
P12724	RNASE3	0.0551239	0.801048
P25311	AZGP1	0.0318865	0.801495
P35968	KDR	0.0371463	0.803819
P01344	IGF2	0.0428583	0.804428
Q9HCL0	PCDH18	0.0680638	0.804913
A0A075B6K0	IGLV3-16	0.0305631	0.80492
Q99584	S100A13	-0.12481	0.805533
O43567	RNF13	0.0483926	0.806434
P11021	HSPA5	-0.0547435	0.808316
P68363;Q71U36;Q9BQE3	TUBA1B;TUBA1A;TUBA1C	0.0575653	0.808744
Q9P1F3	ABRACL	0.055043	0.809162
Q9HBR0	SLC38A10	-0.0295332	0.809998
P07437	TUBB	0.0604676	0.810768
Q86UE4	MTDH	0.0607657	0.811764
Q99983	OMD	-0.0276715	0.812517
P40616	ARL1	-0.0525655	0.813374
O60610	DIAPH1	0.0534276	0.814561
P0DOX2		-0.0340282	0.815224
Q6UWP8	SBSN	-0.050325	0.815474
P11940	PABPC1	0.0667072	0.816188
Q9UKZ9	PCOLCE2	-0.182338	0.816408
Q9H8L6	MMRN2	0.0253826	0.816768
P11684	SCGB1A1	-0.0301795	0.81693
P08590	MYL3	0.0694958	0.817877
P20774	OGN	-0.0398663	0.818201
P21333	FLNA	0.0467861	0.818368
Q96S66	CLCC1	-0.0803252	0.818726
O00329	PIK3CD	0.065021	0.818911
P10643	C7	0.0297124	0.819021
P18850	ATF6	0.0329491	0.819893
O75112	LDB3	-0.0586416	0.820381
P02749	APOH	-0.0398234	0.82071
Q9Y287	ITM2B	0.0490665	0.821007
Q92823	NRCAM	0.0341939	0.821053
Q96JM4	LRRIQ1	-0.0645011	0.821748
P36888	FLT3	0.0727679	0.821954
Q8TDQ0	HAVCR2	-0.040524	0.822058
P78536	ADAM17	0.0528088	0.822796
P04118	CLPS	-0.0287548	0.822949
P02649	APOE	0.027673	0.823184
P06280	GLA	-0.0270998	0.823394
P48551	IFNAR2	0.0446872	0.823827
Q15111;Q9UPR0	PLCL1;PLCL2	0.0421043	0.823987
Q63HN8	RNF213	0.031409	0.824857
P08603	CFH	0.0249619	0.825697
P01009	SERPINA1	-0.0293756	0.825926
P04070	PROC	-0.0321567	0.826469
Q99523	SORT1	0.0452336	0.826993
P07998	RNASE1	0.0345768	0.827462
O60235	TMPRSS11D	0.135896	0.827807
Q765P7	MTSS2	0.0711696	0.828515
Q04695	KRT17	-0.0508897	0.828838
Q9BXR6	CFHR5	-0.0581926	0.829443
P18428	LBP	-0.0316338	0.829486
O75223	GGCT	-0.0473958	0.829498
Q99969	RARRES2	-0.0462195	0.831224
Q9NX18	SDHAF2	-0.06106	0.832653
O15553	MEFV	0.0315618	0.832955
Q9UHG3	PCYOX1	0.0438855	0.833302
A0A075B6Q5	IGHV3-64	0.0336886	0.833853
A0A075B6J2	IGLV2-33	0.052319	0.834277
Q6UXF1	TMEM108	-0.0456539	0.834456
O00533	CHL1	0.0212249	0.835629
A0A0J9YXX1	IGHV5-10-1	0.0140609	0.837256
P54277	PMS1	-0.0170006	0.837273
P68366	TUBA4A	0.0532573	0.837346
O60242	ADGRB3	-0.0444908	0.837675
P01024	C3	0.0171666	0.837891
Q15847	ADIRF	-0.0390723	0.837911
Q9P121	NTM	0.0322236	0.839379
Q9BRA2	TXNDC17	0.0439137	0.840561
Q13541	EIF4EBP1	0.0578565	0.841035
P00568	AK1	0.0634616	0.841353
P01854	IGHE	0.0318641	0.842667
P67809	YBX1	0.0527214	0.84296
P01876	IGHA1	-0.0316116	0.84314
P09848	LCT	-0.0532552	0.844389
P54710	FXYD2	-0.0373806	0.844451
P20333	TNFRSF1B	0.0413601	0.845035
P61916	NPC2	0.0309292	0.845659
A0A0A0MT36	IGKV6D-21	0.0454326	0.845869
P38606	ATP6V1A	0.0877187	0.846493
Q8NFT8	DNER	0.032159	0.846969
P19022	CDH2	0.0307124	0.847014
A0A087WSX0	IGLV5-45	-0.0154851	0.847322
Q68D85	NCR3LG1	-0.0368569	0.847779
Q6ZVN8	HJV	-0.0419233	0.848118
P43307	SSR1	-0.099707	0.849293
O95196	CSPG5	0.0299398	0.850146
P78357	CNTNAP1	-0.0387145	0.850823
Q14CX7	NAA25	-0.047047	0.850942
Q9HC96	CAPN10	-0.0368927	0.851394
Q96F46	IL17RA	-0.0561971	0.852399
P48740	MASP1	-0.0217797	0.852575
Q68CJ9	CREB3L3	-0.0404816	0.852722
P50552	VASP	0.0380129	0.853795
P15509	CSF2RA	0.0276634	0.854252
Q9H336	CRISPLD1	-0.0470383	0.854404
P01011	SERPINA3	-0.0282122	0.854804
P52943	CRIP2	0.0463069	0.854858
Q8TBZ0	CCDC110	0.0734982	0.855775
P07148	FABP1	-0.0235119	0.856047
Q02747	GUCA2A	0.0246853	0.857202
P04156	PRNP	-0.0378671	0.85773
P07951	TPM2	-0.0348541	0.858154
Q99684	GFI1	0.0605862	0.85889
A0A0J9YX35	IGHV3-64D	0.0207778	0.859431
Q08554	DSC1	-0.0286114	0.85985
P05556	ITGB1	-0.025021	0.86028
Q96QA5	GSDMA	0.0807472	0.860319
P98172	EFNB1	-0.0342675	0.860826
P23083	IGHV1-2	0.0238184	0.861163
O75509	TNFRSF21	0.0253979	0.862814
P62937	PPIA	-0.0454624	0.863139
P02748	C9	-0.0221858	0.864078
P29622	SERPINA4	0.027175	0.864233
Q92859	NEO1	0.032709	0.864686
P22792	CPN2	0.0245195	0.864835
O15444	CCL25	0.0332321	0.867197
P21860	ERBB3	-0.0611571	0.869285
Q9BUN1	MENT	-0.0193943	0.869982
P13688	CEACAM1	0.0298143	0.871224
P07988	SFTPB	0.0402506	0.871528
P13647	KRT5	-0.0302982	0.871671
P01780	IGHV3-7	0.0282888	0.871923
Q5TFQ8	SIRPB1	-0.0468291	0.878414
Q06481	APLP2	0.0389672	0.879557
Q4W4Y0	C14orf28	-0.0316222	0.879724
Q9BQT9	CLSTN3	0.0335487	0.882267
P00751	CFB	0.017371	0.882363
Q9UHB6	LIMA1	0.0329931	0.883543
P09619	PDGFRB	-0.0155985	0.883789
P51693	APLP1	0.0379418	0.884142
Q9H9K5	ERVMER34-1	-0.0241891	0.885615
P07358	C8B	0.0185482	0.888289
Q86X29	LSR	-0.0224365	0.889459
P13535	MYH8	0.0323676	0.890247
P04264	KRT1	-0.027347	0.891242
A0A0G2JMI3	IGHV1-69-2	-0.0169628	0.891309
P01040	CSTA	0.0293515	0.891316
P22607	FGFR3	0.0292475	0.892106
Q8N6C8	LILRA3	-0.0153331	0.892184
Q10589	BST2	0.0264964	0.893038
P15090	FABP4	-0.0270368	0.89382
Q7L1S5	CHST9	0.0162317	0.894142
P26447	S100A4	-0.0286596	0.894718
Q9UJC3	HOOK1	-0.0102733	0.894869
P27816	MAP4	0.0344936	0.895421
P02746	C1QB	-0.0175221	0.897425
P32004	L1CAM	-0.016283	0.897697
O95274	LYPD3	0.0236703	0.900175
P01591	JCHAIN	0.0124873	0.900235
O95255	ABCC6	0.0674911	0.900498
P04433	IGKV3-11	0.0168016	0.901022
Q9UJU6	DBNL	-0.0305296	0.901438
Q9Y6Z7	COLEC10	0.014447	0.902645
P35858	IGFALS	0.0142047	0.903549
P28066	PSMA5	-0.0557457	0.903894
Q9HCB6	SPON1	0.0235532	0.904636
Q96GW7	BCAN	-0.0205434	0.905626
P06733	ENO1	0.02733	0.906389
Q6GTX8	LAIR1	0.0212677	0.906593
Q15828	CST6	-0.0183626	0.907139
P09486	SPARC	0.029398	0.907701
P13987	CD59	0.0202145	0.909442
P35612	ADD2	-0.0649023	0.910832
P01593;P01594	IGKV1D-33;IGKV1-33	-0.0127003	0.911226
Q96EE4	CCDC126	-0.0196197	0.912126
A0A087WSZ0	IGKV1D-8	-0.016186	0.912235
Q13449	LSAMP	0.0153212	0.912607
O14791	APOL1	0.0116633	0.913637
Q13093	PLA2G7	0.0463099	0.91364
P35443	THBS4	-0.0218506	0.913692
P02654	APOC1	-0.00978031	0.913991
Q4KMG0	CDON	-0.0178534	0.915015
Q13421	MSLN	0.0506828	0.915634
P16871	IL7R	-0.0125511	0.916187
P03951	F11	-0.0174416	0.916966
O60279	SUSD5	0.017173	0.918073
Q8TDY8	IGDCC4	0.0200562	0.918109
P08670	VIM	0.0197338	0.918509
Q53RT3	ASPRV1	0.0590995	0.918689
P11274	BCR	0.0203485	0.919415
Q14112	NID2	-0.0197472	0.920157
Q9UIV8	SERPINB13	0.502768	0.920433
A0A0A0MS14	IGHV1-45	0.0129932	0.921463
Q9NQ25	SLAMF7	-0.0188257	0.921652
P00742	F10	-0.0120136	0.924839
P54108	CRISP3	0.0132389	0.925136
P30086	PEBP1	0.0551004	0.925186
Q96JM3	CHAMP1	-0.0118274	0.925386
P08709	F7	-0.015102	0.925505
P19957	PI3	-0.0124215	0.925598
P15924	DSP	0.0209707	0.925852
Q99574	SERPINI1	-0.0198714	0.925992
P35542	SAA4	0.0117583	0.926121
Q93091	RNASE6	0.018841	0.926326
Q9UDY2	TJP2	-0.042726	0.92679
Q8N3K9	CMYA5	-0.045078	0.92703
Q09327	MGAT3	0.019425	0.927147
Q05682	CALD1	-0.0189313	0.927502
Q96MG2	JSRP1	0.0200983	0.931679
P31146	CORO1A	0.0178131	0.93277
P10721	KIT	-0.00966384	0.934154
Q15223	NECTIN1	-0.0134124	0.93435
O60312	ATP10A	0.0220024	0.935555
P00736	C1R	0.0102024	0.936344
P07602	PSAP	0.0137309	0.937381
Q9UPW5	AGTPBP1	-0.013429	0.938511
Q99497	PARK7	-0.0283318	0.938936
Q9H756	LRRC19	0.0104234	0.939447
Q9UQV4	LAMP3	0.00987052	0.939801
A0A075B6S5	IGKV1-27	0.014312	0.94027
P15907	ST6GAL1	0.0140648	0.941867
P52209	PGD	-0.0199403	0.942426
P47929	LGALS7	0.0188352	0.94404
Q08345	DDR1	0.0237038	0.944253
Q9UBW5	BIN2	-0.014972	0.94473
O00267	SUPT5H	-0.0124789	0.946875
P49747	COMP	-0.013575	0.947129
Q6UXI9	NPNT	-0.0142572	0.949152
P11226	MBL2	-0.00444015	0.949331
P63173	RPL38	-0.0251872	0.949537
O60427	FADS1	0.0312503	0.950189
P00995	SPINK1	0.011414	0.950408
P60709;P63261	ACTB;ACTG1	0.0133304	0.951788
A0A0C4DH24	IGKV6-21	0.00640967	0.953152
Q96JP2	MYO15B	-0.00936296	0.954189
P25092	GUCY2C	0.0116547	0.955239
Q16787	LAMA3	-0.0116407	0.956621
Q13200	PSMD2	-0.0132845	0.95666
P08174	CD55	-0.0107147	0.957316
P24593	IGFBP5	0.00870535	0.958324
P0CG47;P0CG48;P62979;P62987	UBB;UBC;RPS27A;UBA52	0.0105211	0.960442
P24821	TNC	0.0114857	0.960636
P06899;P23527;P33778;Q16778;Q8N257	H2BC11;H2BC17;H2BC3;H2BC21;H2BC26	0.012895	0.960722
P02774	GC	0.00400593	0.961287
Q04756	HGFAC	-0.00625894	0.961848
Q8NA23	WDR31	-0.00806911	0.962014
Q14574	DSC3	0.00740899	0.963833
P04439	HLA-A	-0.00772394	0.965208
P19320	VCAM1	0.00513769	0.966174
P00748	F12	-0.00512479	0.967391
Q01459	CTBS	-0.00458194	0.967715
P01880	IGHD	0.0054041	0.967745
Q14247	CTTN	0.0088764	0.96787
P00338	LDHA	0.011095	0.968099
Q02413	DSG1	0.00902205	0.968232
P30530	AXL	-0.00566534	0.968414
Q9H1U4	MEGF9	0.00694909	0.968952
Q8WTQ4	C16orf78	0.00373592	0.970224
O75882	ATRN	0.00578558	0.970429
Q5JS37	NHLRC3	-0.0114177	0.97122
Q7Z7M9	GALNT5	-0.0072833	0.971894
P27469	G0S2	-0.0137618	0.973761
Q96EZ8	MCRS1	0.00645353	0.974864
A8K2U0	A2ML1	0.0162805	0.975069
Q5JSH3	WDR44	0.00637625	0.975785
P99999	CYCS	-0.00317404	0.976417
A0A0B4J2H0	IGHV1-69D	-0.00415636	0.976557
Q15643	TRIP11	0.0071146	0.976696
Q8WZ74	CTTNBP2	-0.00486238	0.978456
O00241	SIRPB1	-0.003427	0.979115
Q8IZU2	WDR17	0.00578207	0.98071
Q15843	NEDD8	-0.0083053	0.981095
Q86UD1	OAF	0.00415126	0.981795
O14786	NRP1	-0.00408358	0.984021
O75503	CLN5	-0.00445646	0.984431
P04217	A1BG	-0.00259952	0.984887
P10153	RNASE2	-0.00216616	0.985467
Q6P4E1	GOLM2	-0.00266046	0.985622
Q9HC56	PCDH9	-0.0028559	0.985761
Q9P0L0	VAPA	0.0038903	0.986033
P60985	KRTDAP	-0.00176229	0.989051
Q92187	ST8SIA4	0.00283396	0.989634
P40200	CD96	-0.0024314	0.99013
P55056	APOC4	-0.00133387	0.992013
Q8IZA0	KIAA0319L	0.00149273	0.992339
P07093	SERPINE2	0.00230386	0.993612
Q9NQS3	NECTIN3	0.0011918	0.993699
A0A075B6R9;A0A0C4DH68	IGKV2D-24;IGKV2-24	0.000705702	0.993717
Q13113	PDZK1IP1	-0.00191795	0.99595
P41439	FOLR3	0.0012393	0.99623
Q9ULV4	CORO1C	0.0010624	0.99644
Q13291	SLAMF1	0.000545186	0.996958
Q6ZTR5	CFAP47	-0.000406207	0.997911
P48304	REG1B	0.000204651	0.999136
A6NCW0;A8MUK1;C9J2P7;C9JJH3;C9JLJ4;C9JPN9;C9JVI0;D6R901;D6R9N7;D6RA61;D6RBQ6;D6RCP7;D6RJB6;Q0WX57;Q7RTZ2	USP17L3;USP17L5;USP17L15;USP17L10;USP17L13;USP17L12;USP17L11;USP17L21;USP17L18;USP17L22;USP17L17;USP17L19;USP17L20;USP17L24;USP17L1	0.000219716	0.999331
P50395	GDI2	0.143914	1
Q13867	BLMH	0.664862	1
P00491	PNP	0	1
P59998	ARPC4	0	1
A6NMZ7	COL6A6
P12429	ANXA3	-0.354216
P14625	HSP90B1
Q9BPY8	HOPX	0.858411
Q9Y286	SIGLEC7
Q9Y620	RAD54B

## Sheet: MagNet
ProteinID	GeneID	Estimate	P_value
P55056	APOC4	-0.400287	0.000281257
P08833	IGFBP1	-0.815666	0.000613328
O75636	FCN3	-0.421604	0.000762472
Q92954	PRG4	-0.436323	0.000973241
P02655	APOC2	-0.345411	0.00125073
P02786	TFRC	0.360349	0.00189715
P02763	ORM1	-0.48698	0.00228973
P26022	PTX3	0.391429	0.00308281
O95747	OXSR1	-0.960417	0.00314235
P02649	APOE	-0.338317	0.00344714
P54136	RARS1	-0.971407	0.00403042
P0DP01	IGHV1-8	-0.552232	0.00434402
Q0VD83	APOBR	0.358576	0.00584387
Q9BYE9	CDHR2	-0.431765	0.00680979
Q6ZNJ1	NBEAL2	-0.862246	0.00706756
P01130	LDLR	-0.375579	0.00719592
P09211	GSTP1	1.3247	0.00739435
P35613	BSG	-0.684115	0.00809608
P04114	APOB	-0.383422	0.00840315
Q15485	FCN2	-0.327266	0.00853389
P19256	CD58	1.35673	0.0088816
P25787	PSMA2	-0.31641	0.0102425
P43121	MCAM	0.44357	0.0112779
P01833	PIGR	-0.21443	0.0113358
P08319	ADH4	-0.394785	0.0114495
Q684P5	RAP1GAP2	-1.13328	0.0115158
P10586	PTPRF	-0.392588	0.0117964
Q99832	CCT7	-0.577211	0.0125142
P02741	CRP	-0.469643	0.0125557
P46977	STT3A	0.860418	0.0131629
P63010	AP2B1	-0.655782	0.0131974
Q03591	CFHR1	-0.368114	0.0140825
A0A0G2JS06	IGLV5-39	-0.195764	0.014163
Q9NTK5	OLA1	0.583209	0.0142799
Q96QK1	VPS35	-0.650387	0.0151901
Q8TD16	BICD2	-0.515882	0.0161326
P10909	CLU	-0.403774	0.0162902
P01031	C5	-0.468313	0.0163306
P31930	UQCRC1	-0.794762	0.0164027
Q96KN2	CNDP1	-0.352792	0.0172033
P01814	IGHV2-70	-0.39285	0.0189258
O43242	PSMD3	-0.541934	0.0196565
Q7L1S5	CHST9	0.358657	0.0206422
Q76LX8	ADAMTS13	-0.305252	0.0212536
P00736	C1R	-0.411619	0.02176
P0DJI8	SAA1	-0.418329	0.0219918
Q6UVK1	CSPG4	0.263105	0.0224678
P47712	PLA2G4A	0.929507	0.0238759
P33176	KIF5B	-0.675471	0.024875
Q16539	MAPK14	-0.738036	0.0250516
P01024	C3	-0.430077	0.0254732
Q96P48	ARAP1	-0.781462	0.0258661
Q9HDC9	APMAP	-0.269371	0.026049
Q99715	COL12A1	0.299291	0.0262027
P17980	PSMC3	-0.488337	0.0268082
P10398	ARAF	1.02319	0.0297081
P49908	SELENOP	-0.291941	0.0297393
P05155	SERPING1	-0.426006	0.0297904
Q9Y6R7	FCGBP	-0.203198	0.0313886
O14786	NRP1	0.341545	0.0314287
Q13098	GPS1	-0.509092	0.0321856
P02748	C9	-0.346904	0.0336877
P23526	AHCY	-0.624622	0.033723
P35611	ADD1	-0.475514	0.0341697
P25774	CTSS	-0.467656	0.0344398
Q6V0I7	FAT4	-0.332987	0.0350254
Q02985	CFHR3	-0.27824	0.0371027
P05546	SERPIND1	-0.418411	0.0373561
Q9NRW1	RAB6B	-0.50815	0.0373907
Q16643	DBN1	-0.483526	0.0373938
P11226	MBL2	-0.186868	0.0384524
Q9NY33	DPP3	0.684687	0.0385475
Q99999	GAL3ST1	-0.452616	0.0386767
Q96JM3	CHAMP1	-0.204399	0.0392594
Q92820	GGH	-0.387944	0.0393631
Q13093	PLA2G7	-0.279212	0.0406444
P14151	SELL	-0.241635	0.0413135
Q9HCM4	EPB41L5	-0.320559	0.0420405
P27169	PON1	-0.237977	0.0433757
P01889	HLA-B	-0.485432	0.0436234
P12830	CDH1	-0.374813	0.0437628
P0CG47;P0CG48;P62979;P62987	UBB;UBC;RPS27A;UBA52	-0.388975	0.0440199
Q99798	ACO2	-0.554208	0.0442272
P02652	APOA2	0.331575	0.0443855
P09871	C1S	-0.433256	0.0444177
P80188	LCN2	-0.448551	0.0459142
O00232	PSMD12	-0.503989	0.0474186
P16035	TIMP2	-0.437603	0.047595
Q16698	DECR1	-0.511512	0.0486127
P10644	PRKAR1A	-0.452602	0.0492356
O75874	IDH1	-0.451391	0.0495751
Q15166	PON3	-0.204699	0.049691
Q99969	RARRES2	-0.460199	0.0510277
P00450	CP	-0.313459	0.0539161
P01023	A2M	0.258312	0.0540203
P19652	ORM2	-0.380085	0.0542588
P61769	B2M	-0.39184	0.0548865
Q9P032	NDUFAF4	-0.468259	0.0552306
P11021	HSPA5	-0.38312	0.0554095
P30530	AXL	0.333811	0.0557927
Q9NRC6	SPTBN5	-0.354768	0.0561161
P04003	C4BPA	-0.336562	0.0567104
P30566	ADSL	0.590967	0.0568689
P05121	SERPINE1	-0.198293	0.0577956
O00187	MASP2	-0.232889	0.0580466
Q7LDG7	RASGRP2	-0.40759	0.0580585
P12273	PIP	0.306031	0.0583346
P02743	APCS	-0.295404	0.0584592
P22004	BMP6	0.67484	0.0610316
Q8N755	SLC66A3	0.873939	0.0621038
P01714	IGLV3-19	-0.211323	0.0625505
P02787	TF	0.346181	0.0626878
Q0ZGT2	NEXN	-0.400673	0.0632188
P48643	CCT5	-0.423733	0.0648273
Q8N1N4	KRT78	-0.947178	0.0656658
P26927	MST1	-0.25237	0.0657373
Q9BXS5	AP1M1	0.600495	0.066229
A0A5B6	TRBV28	0.277986	0.0671055
O14498	ISLR	0.380663	0.0677444
P04792	HSPB1	-0.447216	0.0680058
Q15006	EMC2	-1.06061	0.0693171
P05198	EIF2S1	0.465791	0.0718476
P61201	COPS2	-0.422753	0.0729567
Q27J81	INF2	-0.452428	0.0743735
Q7Z7G0	ABI3BP	-0.253978	0.0750499
Q08174	PCDH1	-0.354371	0.0754407
Q8NBS9	TXNDC5	-0.37954	0.075933
Q16401	PSMD5	-0.409304	0.0767813
O76061	STC2	-0.268926	0.076918
Q9Y613	FHOD1	-0.454108	0.0788844
P01715	IGLV3-1	-0.214401	0.07918
Q06830	PRDX1	-0.378291	0.0793542
P39060	COL18A1	-0.256266	0.0798094
Q13477	MADCAM1	-0.220344	0.0807081
O00533	CHL1	-0.273697	0.0807836
Q6DHV5	CC2D2B	-0.641156	0.0816546
O15371	EIF3D	-0.968722	0.0824878
O00560	SDCBP	-0.385809	0.0826497
Q9NQC3	RTN4	-0.391068	0.0834669
P35030	PRSS3	-0.319529	0.0835976
O43182	ARHGAP6	-0.513408	0.0838868
Q9H9B4	SFXN1	0.625858	0.0841441
P52566	ARHGDIB	0.471125	0.084559
P18428	LBP	-0.305226	0.085879
Q14289	PTK2B	0.349355	0.0862322
P08709	F7	-0.293107	0.0865187
Q8N365	CIART	-0.484914	0.0865291
P13987	CD59	-0.418688	0.0872619
Q9BVK6	TMED9	-0.475	0.0878877
P51809	VAMP7	0.783233	0.0882183
Q9NPY3	CD93	0.332543	0.0884455
P01817	IGHV2-5	-0.423786	0.0896733
Q9UNL4	ING4	0.506624	0.090153
A0A0C4DH67	IGKV1-8	0.195618	0.0912534
Q14126	DSG2	0.265915	0.0918795
Q92973	TNPO1	-0.693344	0.0922427
Q7Z388	DPY19L4	-0.541727	0.0929096
Q8IXL6	FAM20C	-0.31866	0.0935558
P02656	APOC3	-0.173448	0.0938954
Q9H6X2	ANTXR1	0.318495	0.0943523
P80108	GPLD1	-0.170639	0.0954404
Q9BUL8	PDCD10	-0.48004	0.0960372
Q92496	CFHR4	-0.205519	0.0964565
Q6IAA8	LAMTOR1	-0.543488	0.097186
P23141	CES1	-0.301167	0.0972649
Q6YHK3	CD109	-0.201834	0.0973545
Q9NPR2	SEMA4B	-0.353719	0.0973981
P40926	MDH2	-0.347979	0.0974586
Q9Y6X9	MORC2	-0.718696	0.0977819
P05090	APOD	0.216998	0.0985988
Q9NY65	TUBA8	-0.351397	0.0988237
P02461	COL3A1	0.387616	0.0999284
Q14247	CTTN	-0.363061	0.100462
Q13045	FLII	-0.429162	0.100773
P42566	EPS15	-0.395274	0.10089
P00325	ADH1B	-0.294051	0.101521
Q9Y2A7	NCKAP1	-0.51855	0.102359
P54619	PRKAG1	-0.366143	0.103251
Q15063	POSTN	-0.249187	0.103353
P11586	MTHFD1	0.462459	0.105993
P07602	PSAP	0.330491	0.10644
P14324	FDPS	-0.426507	0.107007
P09543	CNP	-0.550987	0.107822
Q9BUD6	SPON2	-0.381423	0.108494
Q9UBX1	CTSF	0.230422	0.108548
Q96LT7	C9orf72	-0.317567	0.109443
P30101	PDIA3	-0.319513	0.109573
P35237	SERPINB6	0.48966	0.111027
P05156	CFI	-0.285064	0.111237
P07900	HSP90AA1	-0.31835	0.111265
Q6UXD5	SEZ6L2	-0.361689	0.111567
P23381	WARS1	-0.383145	0.111837
P49257	LMAN1	-0.315955	0.111908
A1L4H1	SSC5D	-0.253861	0.112382
Q86YW5	TREML1	-0.465064	0.112867
Q02818	NUCB1	-0.25243	0.116254
P07307	ASGR2	-0.268195	0.116366
Q8N414	PGBD5	0.489884	0.117108
P14868	DARS1	-0.421917	0.117198
O14818	PSMA7	-0.207844	0.117258
Q9Y6V0	PCLO	-0.330899	0.11763
O95721	SNAP29	-0.578915	0.117711
Q9HCK0	ZBTB26	-0.261622	0.118172
Q9UN70	PCDHGC3	-0.316094	0.1192
Q16762	TST	0.645089	0.119309
P04406	GAPDH	-0.297427	0.119747
Q9P2Y5	UVRAG	-0.294359	0.119798
P12318;P31995	FCGR2A;FCGR2C	0.429502	0.120327
P47929	LGALS7	-0.514687	0.120608
P49755	TMED10	-0.448094	0.12107
Q6PFW1	PPIP5K1	-0.314485	0.121876
Q6XPS3	TPTE2	-0.334952	0.121919
Q9BZQ8	NIBAN1	-0.436104	0.123328
Q9UKK3	PARP4	-0.31346	0.123823
O15231	ZNF185	-0.620036	0.124537
Q9HBB8	CDHR5	-0.387438	0.124612
A0A075B6K6	IGLV4-3	-0.698477	0.124813
P40763	STAT3	-0.544484	0.125123
P33908	MAN1A1	-0.285496	0.125196
Q5T0L3	SPATA46	-0.377758	0.126424
Q9NVA2	SEPTIN11	-0.391919	0.128018
P21291	CSRP1	-0.351796	0.128796
P20618	PSMB1	-0.210137	0.129979
Q96MT3	PRICKLE1	-0.287957	0.130986
P01766	IGHV3-13	0.156367	0.131831
P39748	FEN1	-0.225929	0.131951
Q8N128	FAM177A1	-0.321085	0.132175
Q08345	DDR1	-0.106904	0.132559
P17813	ENG	-0.315045	0.132814
A0FGR8	ESYT2	0.524109	0.133018
P58335	ANTXR2	0.258857	0.133278
P00748	F12	-0.212778	0.13366
Q9H3N1	TMX1	-0.419345	0.134342
P12109	COL6A1	0.278461	0.134373
O60240	PLIN1	0.197955	0.13468
P39059	COL15A1	0.286868	0.134947
Q8IV35	CFAP337	0.242463	0.135064
Q6UXB8	PI16	-0.272588	0.135271
Q7Z5L7	PODN	0.235766	0.135392
P08238	HSP90AB1	-0.300858	0.140748
P07358	C8B	-0.230825	0.141078
P24043	LAMA2	0.212448	0.141216
Q9Y5X9	LIPG	-0.305013	0.141677
Q9NU02	ANKEF1	-0.380482	0.141724
P20340	RAB6A	-0.325471	0.144075
A0A075B6J2	IGLV2-33	-0.177399	0.144652
P01721	IGLV6-57	-0.152452	0.144927
Q9H4M9	EHD1	-0.304897	0.145017
O95715	CXCL14	0.808639	0.14579
O95782	AP2A1	0.399783	0.146707
P38606	ATP6V1A	-0.429979	0.147878
P20851	C4BPB	-0.28216	0.148376
P07357	C8A	-0.207361	0.14844
Q99542	MMP19	0.1815	0.149208
P78539	SRPX	0.370079	0.149354
P38117	ETFB	-0.573309	0.149554
Q86X29	LSR	-0.286847	0.151194
P02647	APOA1	0.22526	0.151295
P10809	HSPD1	-0.325389	0.151418
P07954	FH	-0.607571	0.151546
P48509	CD151	0.400751	0.151596
O00329	PIK3CD	0.281961	0.152564
Q9NY97	B3GNT2	0.298247	0.153033
P05452	CLEC3B	0.174852	0.15407
P28845	HSD11B1	0.349861	0.155392
Q9HAV0	GNB4	-0.410686	0.155786
P00403	MT-CO2	0.609235	0.15682
P26641	EEF1G	-0.310614	0.157813
O14980	XPO1	0.709284	0.158507
P28070	PSMB4	-0.229699	0.158694
P51797	CLCN6	-0.253315	0.161464
O15145	ARPC3	-0.304299	0.162196
Q9UDY2	TJP2	-0.315347	0.162745
Q14644	RASA3	-0.32653	0.164673
P05543	SERPINA7	-0.0970079	0.165902
Q01433	AMPD2	-0.374528	0.166518
P16671	CD36	-0.280694	0.16772
P23528	CFL1	-0.288221	0.168374
Q9NR46	SH3GLB2	0.685236	0.169036
Q8NBX0	SCCPDH	-0.465426	0.169931
P51693	APLP1	0.234556	0.169956
P01042	KNG1	-0.268503	0.170575
P07339	CTSD	-0.359187	0.170695
P00488	F13A1	-0.218677	0.170966
O00139	KIF2A	-0.318175	0.171
P01602	IGKV1-5	-0.143312	0.171234
Q9BXR6	CFHR5	-0.184525	0.172436
P63092;Q5JWF2	GNAS	0.367822	0.173631
Q5K651	SAMD9	0.717732	0.174468
P27797	CALR	-0.22385	0.174532
Q15052	ARHGEF6	0.765177	0.175135
P05387	RPLP2	-0.289152	0.176475
P39656	DDOST	-0.390447	0.176827
O75935	DCTN3	-0.319682	0.178531
P98160	HSPG2	0.162274	0.178762
Q9Y277	VDAC3	-0.280903	0.178969
P06727	APOA4	0.244093	0.179418
P00451	F8	-0.158379	0.179463
P15169	CPN1	-0.214468	0.180836
Q08380	LGALS3BP	-0.163755	0.181024
O75955	FLOT1	-0.302749	0.181194
P13796	LCP1	-0.234515	0.181808
O15335	CHAD	0.269177	0.182189
P0DTL4	LY6S	0.345861	0.183231
P20774	OGN	0.248939	0.183308
O00154	ACOT7	0.440987	0.18335
P50502;Q8IZP2	ST13;ST13P4	-0.269213	0.183459
P14317	HCLS1	-0.391813	0.183844
P18054	ALOX12	-0.367973	0.184747
A0A0A0MS15	IGHV3-49	-0.108474	0.186517
P11597	CETP	-0.194183	0.18727
Q9NR99	MXRA5	-0.179054	0.187701
P23142	FBLN1	-0.267271	0.188149
P04899	GNAI2	-0.288375	0.188305
P18577;Q02161	RHCE;RHD	-0.295406	0.189693
P0C0L5	C4B	-0.130265	0.190045
P08603	CFH	-0.199819	0.190253
Q99972	MYOC	0.244342	0.19029
P01133	EGF	-0.379867	0.190824
Q9NTJ5	SACM1L	-0.303938	0.191102
P42892	ECE1	-0.485815	0.191911
Q96N46	TTC14	-0.253027	0.192132
Q13464	ROCK1	0.396629	0.192497
Q86UN3	RTN4RL2	-0.216891	0.192784
P20742	PZP	-0.131017	0.193076
P06733	ENO1	-0.277636	0.194475
P24592	IGFBP6	-0.269193	0.194631
P02671	FGA	-0.230839	0.194915
P28066	PSMA5	-0.163896	0.196111
P13497	BMP1	-0.212271	0.197507
Q8IWA5	SLC44A2	-0.320353	0.198016
Q92823	NRCAM	-0.215861	0.19879
Q6UW49	SPESP1	0.430373	0.199374
P03950	ANG	-0.289557	0.199915
P00505	GOT2	-0.523225	0.199977
P48740	MASP1	-0.186496	0.200331
A0A0B4J2D9;P0DP09	IGKV1D-13;IGKV1-13	-0.209481	0.200449
P24539	ATP5PB	-0.488383	0.201121
Q08495	DMTN	-0.2804	0.202049
Q9Y2Q3	GSTK1	-0.397474	0.203231
P25786	PSMA1	-0.170603	0.203482
Q05655	PRKCD	0.432024	0.2041
P31323	PRKAR2B	-0.430122	0.204589
Q9UKM7	MAN1B1	0.256298	0.204598
Q9H8L6	MMRN2	0.231222	0.205191
P68104;Q5VTE0	EEF1A1;EEF1A1P5	-0.274465	0.205337
P16112	ACAN	-0.161104	0.206153
P27918	CFP	-0.216577	0.206557
P07585	DCN	0.208346	0.207658
P24557	TBXAS1	-0.277111	0.207986
P21810	BGN	0.184435	0.208237
Q99435	NELL2	-0.268299	0.208399
Q16706	MAN2A1	-0.230039	0.208787
A0A0B4J1X8	IGHV3-43	0.157669	0.209904
P02766	TTR	-0.20683	0.210484
P11171	EPB41	-0.251244	0.210693
A0A2R8Y619;O60814;P06899;P23527;P33778;P57053;P58876;P62807;Q16778;Q5QNW6;Q8N257;Q93079;Q96A08;Q99877;Q99879;Q99880	H2BK1;H2BC12;H2BC11;H2BC17;H2BC3;H2BC12L;H2BC5;H2BC4;H2BC21;H2BC18;H2BC26;H2BC9;H2BC1;H2BC15;H2BC14;H2BC13	0.26558	0.211382
P43405	SYK	0.308424	0.211759
Q8NBJ4	GOLM1	-0.144239	0.211936
Q14571	ITPR2	0.755534	0.212574
P13473	LAMP2	-0.355118	0.212813
P30273	FCER1G	-0.272103	0.213392
P14314	PRKCSH	-0.196736	0.21371
P48960	ADGRE5	-0.284549	0.214532
Q9H3U1	UNC45A	-0.286546	0.215096
Q14517	FAT1	-0.14664	0.21554
Q99961	SH3GL1	0.512489	0.21597
Q9BT78	COPS4	-0.282369	0.21602
A5D6W6	FITM1	-0.203359	0.216026
Q04721	NOTCH2	-0.253649	0.217414
Q14677	CLINT1	-0.383189	0.218078
Q15942	ZYX	-0.262553	0.219347
Q08043	ACTN3	0.222573	0.219441
Q05397	PTK2	-0.810633	0.220182
P49720	PSMB3	-0.184761	0.220385
P05556	ITGB1	-0.264744	0.220577
P49368	CCT3	-0.263194	0.221043
O75915	ARL6IP5	-0.30149	0.221401
Q9H2K8	TAOK3	0.470671	0.221402
O15533	TAPBP	-0.408343	0.223585
A0A0A0MT36	IGKV6D-21	0.113363	0.223841
P61160	ACTR2	-0.260732	0.224219
P15924	DSP	-0.331648	0.224345
P27708	CAD	-0.98939	0.224476
P10645	CHGA	0.161374	0.224593
Q9Y4L1	HYOU1	-0.248591	0.224706
P20701	ITGAL	-0.315592	0.224755
O00194	RAB27B	-0.244412	0.22555
Q9UKU6	TRHDE	-0.21668	0.227976
P04040	CAT	-0.25974	0.22849
Q562R1	ACTBL2	-0.328049	0.228519
Q16378	PRR4	-0.267117	0.228782
P30048	PRDX3	-0.271961	0.229292
Q02108	GUCY1A1	0.396172	0.229671
P49593	PPM1F	0.255501	0.230394
P22223	CDH3	-0.314228	0.230596
P46459	NSF	-0.204463	0.231885
Q969T9	WBP2	0.457615	0.232459
Q9NRL3	STRN4	0.548912	0.233656
P01743	IGHV1-46	-0.15741	0.234443
O60610	DIAPH1	-0.283605	0.234747
Q92800	EZH1	0.190942	0.235986
P02730	SLC4A1	-0.233882	0.236514
P35858	IGFALS	-0.158438	0.236583
P35232	PHB1	-0.28413	0.23851
P0C0L4	C4A	-0.128734	0.239384
A0A0B4J1U7	IGHV6-1	-0.156634	0.239533
P30041	PRDX6	-0.253872	0.239751
P02675	FGB	-0.203113	0.240142
Q96K76	USP47	0.39294	0.24248
P17858	PFKL	-0.281765	0.242814
P46109	CRKL	-0.318102	0.245393
Q8N699	MYCT1	-0.314604	0.245755
O75015	FCGR3B	-0.239052	0.24712
A0A0B4J1X5	IGHV3-74	-0.130917	0.248126
P23435	CBLN1	-0.187733	0.249
Q14515	SPARCL1	0.154833	0.249547
Q9Y4E8	USP15	-0.282332	0.250022
A0A0B4J1Y8	IGLV9-49	-0.0823924	0.25022
Q14008	CKAP5	0.303051	0.250241
Q8N1G4	LRRC47	-0.526058	0.250656
Q99436	PSMB7	-0.162661	0.250699
O75144	ICOSLG	-0.24318	0.25218
O00339	MATN2	0.406342	0.252329
O14950;P19105	MYL12B;MYL12A	-0.249387	0.252913
Q9NZ08	ERAP1	-0.187418	0.254539
A0A8I5KQE6;P08865	RPSA2;RPSA	-0.370629	0.255554
P15144	ANPEP	-0.212204	0.2558
P50416	CPT1A	0.335956	0.257075
P07360	C8G	-0.226183	0.25721
P11166	SLC2A1	-0.243088	0.258056
P14618	PKM	-0.245028	0.258139
P12821	ACE	0.209477	0.258216
O15144	ARPC2	-0.25269	0.258862
P11137	MAP2	-0.436914	0.259404
O60268	KIAA0513	-0.354091	0.263141
P12883	MYH7	-0.274616	0.263159
P47755	CAPZA2	-0.357783	0.264119
Q9HAW4	CLSPN	-0.114145	0.264354
P04179	SOD2	-0.262589	0.264417
Q96CX2	KCTD12	-0.316758	0.264511
Q8WWA0	ITLN1	0.139855	0.264901
Q14254	FLOT2	-0.275261	0.265882
P02679	FGG	-0.191034	0.266506
P49407	ARRB1	-0.366448	0.266528
A0AVT1	UBA6	-0.350401	0.267067
P08514	ITGA2B	-0.23646	0.267381
A0A0B4J1Y9	IGHV3-72	-0.112076	0.268578
P05107	ITGB2	0.324267	0.268816
P11279	LAMP1	-0.240793	0.269895
P68366	TUBA4A	-0.230795	0.270177
P51575	P2RX1	0.564294	0.271338
A0A0C4DH24	IGKV6-21	0.0910063	0.271714
P04278	SHBG	0.114754	0.272072
P48735	IDH2	-0.2343	0.27212
P06132	UROD	-0.430753	0.272653
P0CH99;P0CI00	ZNF705D;ZNF705B	-0.251792	0.273093
Q32MZ4	LRRFIP1	-0.464704	0.273626
P38646	HSPA9	-0.323435	0.2753
P16930	FAH	-0.247572	0.276754
P04632	CAPNS1	-0.230495	0.277732
P35443	THBS4	0.175607	0.278046
O00203	AP3B1	0.361042	0.278162
P47756	CAPZB	-0.228662	0.279186
A0A0C4DH29	IGHV1-3	0.121862	0.279383
P55058	PLTP	-0.156033	0.279427
P54753	EPHB3	0.356589	0.279486
Q01813	PFKP	-0.271517	0.279877
P49327	FASN	-0.224154	0.280496
P13591	NCAM1	-0.147001	0.283052
A0A0A0MS14	IGHV1-45	0.192016	0.283391
P30740	SERPINB1	-0.233748	0.284385
O94985	CLSTN1	0.184728	0.284824
P50570	DNM2	-0.308809	0.286049
A0A075B6K2	IGLV3-12	-0.145153	0.289178
O95140	MFN2	0.558178	0.289612
Q9Y5S2	CDC42BPB	0.441449	0.290001
O00231	PSMD11	-0.25817	0.290571
P26038	MSN	-0.217834	0.290669
Q9UKU9	ANGPTL2	-0.188622	0.290883
P05060	CHGB	0.197824	0.291818
P05062	ALDOB	-0.169832	0.292324
P17812	CTPS1	0.631075	0.292442
P27338	MAOB	-0.262531	0.292905
P55010	EIF5	0.301063	0.292954
Q15019	SEPTIN2	-0.327905	0.293152
Q92905	COPS5	0.276557	0.293377
Q05682	CALD1	-0.232411	0.293821
P30405	PPIF	0.26106	0.294124
Q9Y230	RUVBL2	0.557645	0.294258
Q8WZ42	TTN	0.161958	0.295726
P35998	PSMC2	-0.230978	0.297849
P09493	TPM1	-0.227271	0.297911
P11216	PYGB	-0.242345	0.298962
P61019;Q8WUD1	RAB2A;RAB2B	-0.281302	0.299122
Q96JP9	CDHR1	-0.611403	0.299466
P13798	APEH	-0.208951	0.299832
P11277	SPTB	-0.224505	0.300709
Q07960	ARHGAP1	-0.21335	0.301116
P08254	MMP3	0.265295	0.302832
Q13976	PRKG1	-0.520045	0.303308
Q99623	PHB2	-0.318579	0.303997
P62834	RAP1A	-0.235284	0.305242
Q8TF66	LRRC15	-0.241882	0.305246
P61106	RAB14	-0.248828	0.30656
Q8IXS2	CCDC65	0.147763	0.307248
P24844	MYL9	-0.227155	0.308309
Q00610	CLTC	-0.220358	0.30898
Q7Z7M8	B3GNT8	-0.170182	0.309807
Q7LGC8	CHST3	0.209419	0.309846
Q8TER0	SNED1	-0.16841	0.309959
Q07507	DPT	-0.15862	0.310565
A0A075B6J9	IGLV2-18	-0.066355	0.311238
P00568	AK1	0.301696	0.31173
P08311	CTSG	-0.119658	0.314225
P22792	CPN2	-0.180094	0.315474
Q8WWA1	TMEM40	-0.396048	0.315763
Q9H4B7	TUBB1	-0.213289	0.316833
O75558	STX11	-0.249994	0.317891
P27824	CANX	-0.220322	0.318193
Q16531	DDB1	-0.316067	0.318726
P33151	CDH5	0.168295	0.319128
P02788	LTF	-0.27348	0.319429
P20339	RAB5A	-0.216865	0.319984
P01701	IGLV1-51	0.0645151	0.320512
Q9P289	STK26	0.51104	0.320841
P10721	KIT	-0.177086	0.322854
P01705	IGLV2-23	0.12536	0.323643
P08217;P08218	CELA2A;CELA2B	0.386615	0.32373
P53396	ACLY	-0.25391	0.323995
P16284	PECAM1	-0.209505	0.324523
P0DOX4		-0.12261	0.326246
P62333	PSMC6	-0.367758	0.326774
P05023	ATP1A1	-0.197889	0.328011
P23229	ITGA6	-0.216659	0.328251
Q9UGM5	FETUB	-0.158195	0.328272
P0DP23;P0DP24;P0DP25	CALM1;CALM2;CALM3	-0.213194	0.328942
Q7LFX5	CHST15	0.200736	0.328961
O00151	PDLIM1	-0.21075	0.329618
P98194	ATP2C1	0.471651	0.3306
P28838	LAP3	-0.315899	0.330904
Q9BPX5	ARPC5L	0.430078	0.331232
P13804	ETFA	-0.426736	0.331273
P17987	TCP1	-0.228165	0.331812
Q15404	RSU1	-0.203469	0.33208
P13489	RNH1	-0.240636	0.332611
P23471	PTPRZ1	-0.140155	0.332687
P67936	TPM4	-0.211724	0.333447
P07384	CAPN1	-0.207997	0.33408
P06753	TPM3	-0.202265	0.334086
P12110	COL6A2	0.186406	0.335042
Q9P126	CLEC1B	-0.262056	0.335622
Q10472	GALNT1	-0.506665	0.335793
P27105	STOM	-0.210225	0.336989
P00387	CYB5R3	-0.210355	0.337392
Q13283	G3BP1	-0.279176	0.337483
P04843	RPN1	-0.250772	0.33777
A0A075B6K5	IGLV3-9	-0.147132	0.33868
P62826	RAN	-0.206337	0.339457
P80723	BASP1	-0.358292	0.339932
Q9UK05	GDF2	-0.220478	0.340223
A0A0C4DH34	IGHV4-28	-0.138941	0.341697
P00367;P49448	GLUD1;GLUD2	0.239319	0.34175
Q9H0U3	MAGT1	0.375419	0.341909
P07093	SERPINE2	0.158909	0.341934
O75116	ROCK2	-0.205763	0.34292
P16452	EPB42	-0.20415	0.342994
P07948	LYN	-0.20562	0.343818
O43150	ASAP2	-0.26053	0.344392
O60279	SUSD5	0.154328	0.345286
Q9UHQ9	CYB5R1	-0.357101	0.345292
Q9NZN4	EHD2	0.246618	0.346091
O60449	LY75	0.489243	0.346687
P62328	TMSB4X	-0.19956	0.346748
Q86TP1	PRUNE1	-0.550681	0.346887
P08962	CD63	0.305032	0.347329
P01344	IGF2	-0.197765	0.347444
P11150	LIPC	-0.123077	0.348466
Q6P4E1	GOLM2	-0.161565	0.34892
P07195	LDHB	-0.204594	0.349407
O43866	CD5L	-0.0897553	0.349918
P36915	GNL1	0.280741	0.350349
Q9NVI7	ATAD3A	-1.35319	0.350587
Q07954	LRP1	-0.149037	0.351095
P35612	ADD2	-0.266268	0.351547
P50990	CCT8	-0.199161	0.351704
P54108	CRISP3	-0.285363	0.351938
P60891	PRPS1	-0.239206	0.351995
P13224	GP1BB	-0.20426	0.352345
P08567	PLEK	-0.202126	0.353175
P00918	CA2	-0.209677	0.353381
P21333	FLNA	-0.197104	0.353985
P48426	PIP4K2A	-0.213578	0.354251
P11142	HSPA8	-0.203065	0.354822
Q9NPQ8	RIC8A	-0.25244	0.356847
P11047	LAMC1	-0.15266	0.358473
P22234	PAICS	-0.240055	0.358509
P04275	VWF	0.154044	0.358609
O76003	GLRX3	-0.374264	0.358662
Q9H939	PSTPIP2	0.318972	0.3587
Q9UNZ2	NSFL1C	-0.248035	0.358743
P35579	MYH9	-0.194241	0.358775
O95866	MPIG6B	-0.219434	0.359955
Q96C24	SYTL4	0.259449	0.360237
Q9Y6W5	WASF2	-0.237932	0.361391
P12814	ACTN1	-0.195222	0.362643
P29350	PTPN6	-0.211138	0.364267
P08575	PTPRC	-0.132827	0.364322
P35555	FBN1	-0.197019	0.364386
P55268	LAMB2	-0.199085	0.364443
P04075	ALDOA	-0.196549	0.367207
O95810	CAVIN2	-0.196682	0.367648
Q01082	SPTBN1	-0.197074	0.367709
A0A075B6S5	IGKV1-27	-0.366944	0.368011
A0M8Q6	IGLC7	0.0984488	0.369125
P11177	PDHB	-0.482943	0.369756
P55084	HADHB	-0.345245	0.369941
P68363	TUBA1B	-0.191995	0.370175
P18085	ARF4	-0.203352	0.371249
Q92930	RAB8B	0.300216	0.372437
P16871	IL7R	0.0928764	0.373824
Q8IZP7	HS6ST3	-0.340732	0.373873
P00738	HP	-0.124856	0.374853
P00338	LDHA	-0.192568	0.376269
P08670	VIM	-0.156729	0.378454
P46939	UTRN	-0.233918	0.378982
Q9H8J5	MANSC1	-0.230763	0.379116
Q04917	YWHAH	-0.186886	0.379155
O75396	SEC22B	-0.217982	0.379717
P00390	GSR	-0.193931	0.379763
Q4LDE5	SVEP1	-0.0860732	0.379831
Q8NEU8	APPL2	0.465849	0.380647
P30040	ERP29	0.213162	0.381364
Q15907	RAB11B	-0.191606	0.381583
P13611	VCAN	0.145154	0.381982
Q96D15	RCN3	0.244133	0.382981
Q8WUM4	PDCD6IP	-0.189719	0.383146
O14594	NCAN	0.151354	0.38395
P27701	CD82	-0.159366	0.383966
P07947	YES1	-0.190465	0.38466
Q96RL7	VPS13A	0.21444	0.38602
O14745	NHERF1	-0.252943	0.386674
P60985	KRTDAP	-0.123635	0.386774
Q14112	NID2	-0.19041	0.387216
P06681	C2	-0.129563	0.388358
Q9ULV4	CORO1C	-0.211358	0.388928
P31146	CORO1A	-0.188665	0.389663
Q9UBR2	CTSZ	0.246213	0.390785
O43491	EPB41L2	-0.272531	0.391876
Q9BY67	CADM1	-0.151274	0.392708
P01880	IGHD	-0.0676632	0.392973
P32004	L1CAM	-0.166037	0.39333
P09496	CLTA	0.226129	0.394261
P16109	SELP	-0.184639	0.395022
P30049	ATP5F1D	-0.289472	0.395627
Q96SB3	PPP1R9B	-0.466716	0.395865
P40227	CCT6A	-0.190943	0.397431
P51148	RAB5C	0.259863	0.397786
Q96JQ0	DCHS1	-0.28082	0.399957
Q9UBW5	BIN2	-0.187706	0.400176
P25705	ATP5F1A	-0.172823	0.400275
Q02952	AKAP12	0.137376	0.40152
O43294	TGFB1I1	0.315011	0.401658
P19021	PAM	-0.160409	0.402255
P02549	SPTA1	-0.180199	0.40463
P15531;P22392	NME1;NME2	-0.251023	0.404876
P09669	COX6C	-0.180314	0.405674
O00299	CLIC1	-0.179104	0.406218
Q9UHD4	CIDEB	-0.382683	0.407303
Q8WUW1	BRK1	-0.151199	0.408693
P0DMV8;P0DMV9	HSPA1A;HSPA1B	-0.18355	0.408711
Q9NX40	OCIAD1	0.476827	0.409286
Q6ZRQ5	MMS22L	0.239936	0.409808
Q96AG4	LRRC59	0.188633	0.410074
P60900	PSMA6	-0.0903111	0.410337
O43639	NCK2	0.277449	0.410755
P12111	COL6A3	0.132531	0.411092
O43505	B4GAT1	0.175414	0.412219
P07355	ANXA2	0.170167	0.412336
P07477	PRSS1	-0.180609	0.412913
Q13113	PDZK1IP1	-0.164177	0.412975
B4DU55	ZNF879	0.381105	0.413227
A6NKC9	SH2D7	-0.162359	0.413879
P15170	GSPT1	-0.249372	0.414484
Q8WZ75	ROBO4	-0.254517	0.414526
P60660	MYL6	-0.176532	0.415075
P05067	APP	0.176946	0.415832
Q10567	AP1B1	-0.315572	0.416377
P37802	TAGLN2	-0.171325	0.416719
Q8N2S1	LTBP4	0.149275	0.417977
Q6UY14	ADAMTSL4	0.138161	0.417995
P07203	GPX1	-0.178717	0.41861
Q6UWD8	C16orf54	0.170327	0.418699
P68371	TUBB4B	-0.172605	0.419608
P07237	P4HB	-0.159853	0.420987
P36404	ARL2	-0.160854	0.421142
P11413	G6PD	-0.177975	0.421218
P43251	BTD	-0.122291	0.421226
Q9NQ75	CASS4	-0.211156	0.422276
Q14432	PDE3A	-0.127222	0.422501
P60709	ACTB	-0.17136	0.422851
P40967	PMEL	-0.135281	0.423072
P19320	VCAM1	0.106638	0.423658
P32119	PRDX2	-0.151559	0.424486
Q9HBI1	PARVB	-0.171247	0.424624
Q3ZCW2	LGALSL	0.248282	0.425402
Q9P0L0	VAPA	0.280872	0.426703
Q14012	CAMK1	0.152189	0.427559
Q16820	MEP1B	-0.135895	0.427942
P49641	MAN2A2	-0.15912	0.42878
Q13813	SPTAN1	0.251017	0.429121
P78371	CCT2	-0.175941	0.429729
P62873	GNB1	-0.168198	0.430523
P50225	SULT1A1	-0.302745	0.430683
A0A0J9YXX1	IGHV5-10-1	-0.0589841	0.431382
O00592	PODXL	-0.14326	0.431868
A0A0G2JMI3	IGHV1-69-2	0.085958	0.432025
Q9UBN7	HDAC6	-0.66832	0.432312
P00747	PLG	-0.109032	0.432558
P04211	IGLV7-43	-0.100399	0.432589
Q9Y490	TLN1	-0.16919	0.43265
P08648	ITGA5	-0.181811	0.433734
P0DOX2		-0.118308	0.434695
O95477	ABCA1	-0.0765406	0.435352
Q4KMQ2	ANO6	-0.208797	0.43637
Q13740	ALCAM	-0.107708	0.436544
O00264	PGRMC1	-0.173258	0.43666
A0A0A0MT89	IGKJ1	-0.0709075	0.437362
O43747	AP1G1	0.236376	0.437858
Q7L576	CYFIP1	-0.179602	0.437933
Q93084	ATP2A3	-0.171586	0.438257
P04264	KRT1	-0.145367	0.439121
Q9NV96	TMEM30A	0.696154	0.439495
Q9UKZ9	PCOLCE2	-0.143293	0.440082
Q99909	SSX3	0.238155	0.440239
Q86VP6	CAND1	-0.164218	0.440703
P14770	GP9	-0.189422	0.441249
P05141	SLC25A5	0.376734	0.441634
P40197	GP5	-0.160978	0.442204
P35542	SAA4	-0.125543	0.442425
Q14767	LTBP2	0.126503	0.442542
Q03468	ERCC6	-0.122155	0.443517
P18206	VCL	-0.167955	0.443599
P53621	COPA	0.213285	0.444573
P05771	PRKCB	-0.265639	0.444877
Q02487	DSC2	-0.148014	0.44569
Q15149	PLEC	-0.173296	0.446084
P24534	EEF1B2	0.227231	0.446763
P36871	PGM1	-0.191787	0.447623
O75581	LRP6	-0.213233	0.448401
Q7Z434	MAVS	0.394089	0.448925
P11215	ITGAM	-0.152748	0.449691
P55072	VCP	-0.164643	0.450521
P01111	NRAS	-0.184888	0.45063
P08493	MGP	0.115471	0.450768
Q15084	PDIA6	-0.162906	0.452321
Q15293	RCN1	0.112694	0.452543
Q9H4G4	GLIPR2	-0.140015	0.45296
P07478	PRSS2	-0.0950338	0.453606
P07951	TPM2	-0.18276	0.454762
P60174	TPI1	-0.164401	0.455223
P63098	PPP3R1	-0.252433	0.455304
P49721	PSMB2	-0.118414	0.455377
P55160	NCKAP1L	-0.0924188	0.455729
O43432	EIF4G3	0.263228	0.457323
Q15691	MAPRE1	-0.163954	0.457326
Q9NX63	CHCHD3	0.89522	0.457923
P50453	SERPINB9	-0.173144	0.458049
Q9UBP4	DKK3	0.135394	0.458058
P48444	ARCN1	-0.26218	0.45817
O60664	PLIN3	0.606896	0.458301
P12882;P13535;Q9UKX2	MYH1;MYH8;MYH2	-0.420388	0.458399
Q00013	MPP1	-0.175049	0.458986
P29122	PCSK6	-0.152022	0.45911
P63104	YWHAZ	-0.161798	0.460559
P0DOY2;P0DOY3	IGLC2;IGLC3	0.105283	0.461032
Q14697	GANAB	-0.134043	0.461078
Q08830	FGL1	-0.117187	0.461085
Q9BWM7	SFXN3	-0.359776	0.46165
Q9BXN1	ASPN	0.119492	0.46216
P17301	ITGA2	-0.147001	0.462628
A0A0B4J1V1	IGHV3-21	-0.379891	0.462852
P01619	IGKV3-20	-0.0553305	0.464414
P23284	PPIB	-0.14068	0.465342
Q15746	MYLK	-0.160863	0.465368
O75083	WDR1	-0.159746	0.465611
P61604	HSPE1	-0.153215	0.466042
Q8WWZ8	OIT3	-0.102061	0.466364
P45880	VDAC2	-0.165296	0.467573
P53814	SMTN	0.327223	0.46802
Q9H479	FN3K	-0.248506	0.468265
Q8IUK5	PLXDC1	0.104481	0.470038
O43707	ACTN4	-0.162137	0.470422
P14923	JUP	0.222992	0.470718
Q8WWK9	CKAP2	-0.136599	0.470962
Q14393	GAS6	0.0968614	0.470987
Q9H0U4	RAB1B	-0.158602	0.471405
Q8N5J2	MINDY1	-0.377745	0.47261
Q9UPV0	CEP164	-0.134095	0.473033
P08779	KRT16	0.186843	0.473349
P49643	PRIM2	-0.15131	0.473389
P04196	HRG	-0.0780541	0.473774
P04080	CSTB	-0.233477	0.474179
P07911	UMOD	-0.257347	0.474318
P62258	YWHAE	-0.154243	0.474413
Q9UHI8	ADAMTS1	-0.15596	0.475021
P13646	KRT13	-0.133734	0.475324
P51659	HSD17B4	-0.168763	0.475486
P01871	IGHM	-0.104961	0.476261
P04439	HLA-A	-0.123017	0.476657
Q9NZN3	EHD3	-0.149892	0.476715
P01008	SERPINC1	-0.122326	0.476966
O00743	PPP6C	0.19308	0.477319
P37840	SNCA	-0.145531	0.478112
A0A0B4J1V6	IGHV3-73	0.077034	0.478523
Q86UX7	FERMT3	-0.155066	0.479378
Q9BXX0	EMILIN2	0.214763	0.479884
P02042	HBD	-0.148693	0.480526
P62495	ETF1	-0.163436	0.481537
P61224	RAP1B	-0.14957	0.481881
Q5D862	FLG2	-0.331147	0.482469
P00739	HPR	-0.0660893	0.482996
P08519	LPA	-0.0606695	0.483303
P05106	ITGB3	-0.152957	0.484603
P13598	ICAM2	-0.139352	0.486182
Q15365	PCBP1	-0.215484	0.486766
P00491	PNP	-0.152319	0.487402
P59998	ARPC4	-0.151115	0.487488
P15291	B4GALT1	-0.120685	0.487733
P40939	HADHA	-0.196206	0.488155
A0A0A0MRZ9	IGLV5-52	-0.186795	0.488971
P17936	IGFBP3	0.117639	0.489652
P07225	PROS1	-0.139581	0.490002
Q99439	CNN2	-0.158196	0.490376
Q9Y6E0	STK24	0.211587	0.490761
Q99983	OMD	-0.0955241	0.491199
P02774	GC	-0.119783	0.491274
P60842	EIF4A1	-0.150649	0.491413
P07359	GP1BA	0.121759	0.491981
Q6GTS8	PM20D1	0.184874	0.493062
P36959	GMPR	0.333307	0.493573
O14983	ATP2A1	-0.154869	0.493875
P11169	SLC2A3	-0.150846	0.494353
O95084	PRSS23	-0.159704	0.494423
Q8N4C8	MINK1	0.152887	0.495704
Q96I82	KAZALD1	-0.190344	0.495893
Q9Y5C1	ANGPTL3	0.11912	0.496015
P48507	GCLM	-0.146296	0.496772
P28062	PSMB8	-0.0804722	0.49846
P09619	PDGFRB	0.0783661	0.498522
P22692	IGFBP4	0.124099	0.49918
P02750	LRG1	-0.0987112	0.499971
P07737	PFN1	-0.14764	0.50071
P55290	CDH13	-0.112894	0.500874
Q8WWI5	SLC44A1	-0.128835	0.502213
P36969	GPX4	0.15557	0.502598
P00492	HPRT1	-0.147652	0.503081
P23368	ME2	-0.174172	0.503241
Q06481	APLP2	-0.341973	0.504155
Q96T51	RUFY1	0.184423	0.506062
Q14520	HABP2	-0.101354	0.506152
Q6DD88	ATL3	-0.177663	0.506619
Q9ULC5	ACSL5	0.293103	0.507695
Q8TEA8	DTD1	0.320682	0.507843
P08571	CD14	0.116667	0.50798
P27348	YWHAQ	-0.143397	0.508495
O60229	KALRN	-0.175056	0.509563
Q9Y6F6	IRAG1	0.217097	0.509906
Q9BX10	GTPBP2	0.314783	0.511086
P0DTE1	IGHV3-38-3	-0.0724823	0.511318
Q86UE4	MTDH	0.260041	0.511774
Q96A26	FAM162A	-0.236163	0.512028
Q15762	CD226	-0.183037	0.512195
P27487	DPP4	0.100654	0.512403
Q16891	IMMT	-0.330128	0.512569
Q92187	ST8SIA4	0.131849	0.512839
Q04837	SSBP1	-0.18563	0.515211
Q8N3F0	MTURN	0.342916	0.515285
P05154	SERPINA5	0.107944	0.515378
P02775	PPBP	-0.134061	0.516007
Q00325	SLC25A3	-0.161293	0.516075
P36957	DLST	-0.215091	0.517628
P12035	KRT3	-0.123124	0.517798
Q13555	CAMK2G	0.35709	0.517831
P56134	ATP5MF	-0.243737	0.518201
Q16555	DPYSL2	-0.15214	0.51827
P12931	SRC	-0.157876	0.519935
Q96L34	MARK4	-0.0740571	0.520034
Q8IZQ1	WDFY3	0.189611	0.521183
Q7L591	DOK3	0.234966	0.521533
P69905	HBA1	-0.134848	0.522415
P69891	HBG1	-0.13768	0.522602
Q9NYL9	TMOD3	-0.173561	0.524136
Q9Y4D1	DAAM1	-0.177977	0.524814
O00116	AGPS	-0.435257	0.524872
Q96PD5	PGLYRP2	0.11549	0.526817
Q9UBG0	MRC2	-0.18396	0.527282
Q01518	CAP1	-0.139719	0.527354
P19823	ITIH2	0.0982679	0.527531
Q02218	OGDH	0.292529	0.527793
Q96EF6	FBXO17	-0.048896	0.528197
P62993	GRB2	0.238515	0.528663
Q9UM47	NOTCH3	0.133652	0.529198
Q86U17	SERPINA11	0.138379	0.529443
O00161	SNAP23	-0.142703	0.531235
O00159	MYO1C	0.151352	0.532346
P19013	KRT4	0.208951	0.532991
P35813	PPM1A	0.163162	0.533767
A0A0B4J1V0	IGHV3-15	-0.0565058	0.534442
Q9BVC6	TMEM109	-0.160083	0.534521
Q01638	IL1RL1	0.110442	0.535163
P61158	ACTR3	-0.134	0.535433
Q8NBP7	PCSK9	0.113118	0.536282
P55083	MFAP4	-0.0925747	0.537039
P00966	ASS1	-0.114016	0.538025
Q9UF33	EPHA6	0.358194	0.538277
Q9Y394	DHRS7	-0.1664	0.538789
P25788	PSMA3	-0.0745498	0.539245
Q12797	ASPH	0.135125	0.540046
P55786	NPEPPS	-0.130491	0.541248
Q96J42	TXNDC15	0.0980578	0.541418
P06702	S100A9	-0.106983	0.541549
Q13201	MMRN1	-0.130407	0.543468
Q15555	MAPRE2	-0.137744	0.543886
P08253	MMP2	0.104492	0.544099
P01011	SERPINA3	-0.10204	0.54462
P50552	VASP	-0.13549	0.544865
A0A075B6K4	IGLV3-10	-0.070054	0.545109
P01834	IGKC	-0.0711701	0.546376
P02753	RBP4	-0.102051	0.547578
P61225	RAP2B	-0.129883	0.54833
Q14203	DCTN1	-0.150935	0.548526
O15439	ABCC4	-0.225687	0.549478
P06576	ATP5F1B	-0.134394	0.550283
P04004	VTN	-0.0855204	0.55162
P78509	RELN	-0.0897062	0.551675
Q9Y3F4	STRAP	-0.264648	0.552639
P01137	TGFB1	-0.135785	0.553325
A0A087WSY4	IGHV4-30-2	-0.816573	0.554057
Q6PJW8	CNST	0.206705	0.554182
P23219	PTGS1	0.156991	0.554217
P41250	GARS1	-0.164633	0.554295
P01706	IGLV2-11	-0.0546943	0.554296
P00751	CFB	-0.0898692	0.554624
P61981	YWHAG	-0.129498	0.554852
Q8IUX7	AEBP1	0.087676	0.555044
Q9UNN8	PROCR	0.09707	0.555873
P03952	KLKB1	0.0919131	0.556423
Q86Y82	STX12	0.270052	0.55694
Q9UNS2	COPS3	-0.152313	0.557432
Q6P1M0	SLC27A4	-0.245896	0.558117
Q5SYB0	FRMPD1	0.123233	0.558946
O00501	CLDN5	-0.338653	0.55905
Q8TD06	AGR3	-0.0953495	0.559861
P42768	WAS	0.270715	0.560074
P01780	IGHV3-7	0.0779369	0.561196
Q9Y624	F11R	-0.128564	0.561899
Q9UIB8	CD84	-0.159857	0.562219
O00186	STXBP3	0.1497	0.562616
P61421	ATP6V0D1	-0.202136	0.563187
P60953	CDC42	-0.13305	0.56393
P17655	CAPN2	0.0554231	0.564171
Q05707	COL14A1	0.11014	0.564675
P35606	COPB2	-0.193212	0.565045
Q9Y2Y8	PRG3	-0.103306	0.566466
P08697	SERPINF2	-0.0998608	0.56707
Q96AP7	ESAM	-0.156879	0.567633
A0A075B6I0	IGLV8-61	-0.0319345	0.56938
P51149	RAB7A	-0.124559	0.56985
O00233	PSMD9	-0.285984	0.57032
Q02094	RHAG	-0.127389	0.570396
P34897	SHMT2	0.23218	0.571514
P55291	CDH15	0.0548774	0.571561
P26885	FKBP2	0.865039	0.572483
Q96MK2	RIPOR3	0.180717	0.573787
P31040	SDHA	-0.304323	0.573893
Q658P3	STEAP3	0.195323	0.575877
Q9HB71	CACYBP	-0.220708	0.575999
O14656	TOR1A	-0.106365	0.576154
P0DMM9;P0DMN0	SULT1A3;SULT1A4	0.362795	0.577287
P12955	PEPD	0.144944	0.5775
P02538	KRT6A	-0.115433	0.578024
P07476	IVL	-0.169087	0.578581
Q6UXI9	NPNT	-0.143695	0.579377
O15511	ARPC5	-0.121346	0.580632
P41222	PTGDS	0.151736	0.58161
Q9Y2Q0	ATP8A1	-0.151477	0.582125
P16150	SPN	-0.058399	0.582496
P13716	ALAD	-0.11125	0.583469
P29401	TKT	-0.217784	0.583692
Q99574	SERPINI1	-0.148695	0.584337
P22897	MRC1	-0.115762	0.585498
P02747	C1QC	-0.078436	0.587395
P81605	DCD	-0.111974	0.590091
P0DOX6		-0.0407305	0.590732
P55036	PSMD4	-0.179038	0.590757
A0A075B6S6	IGKV2D-30	-0.0746682	0.590984
Q12860	CNTN1	-0.119471	0.591638
Q9NX76	CMTM6	-0.190121	0.591787
P19367	HK1	-0.124946	0.59183
Q9NYQ6	CELSR1	-0.113992	0.593716
Q6E0U4	DMKN	0.119714	0.593871
P02776	PF4	-0.108267	0.594504
Q8IZP0	ABI1	0.129221	0.59499
Q14974	KPNB1	-0.119115	0.595539
O75964	ATP5MG	-0.14075	0.595798
P06858	LPL	-0.0771311	0.596734
P05160	F13B	-0.0800409	0.59735
P10619	CTSA	0.17732	0.597376
Q9GZP7	VN1R1	0.129826	0.598865
P01597;P04432	IGKV1-39;IGKV1D-39	-0.0695983	0.599537
Q16270	IGFBP7	-0.127154	0.599958
P14209	CD99	-0.149955	0.600258
Q9HCM3	KIAA1549	-0.123768	0.600559
Q96HC4	PDLIM5	0.159459	0.600752
Q9NZQ3	NCKIPSD	-0.230265	0.600861
P28072	PSMB6	-0.0911246	0.60132
Q00722	PLCB2	-0.187203	0.601915
Q86UF1	TSPAN33	-0.288543	0.602453
P01009	SERPINA1	0.0845223	0.602585
P07333	CSF1R	-0.0950745	0.602654
Q15435	PPP1R7	0.111081	0.602752
P49588	AARS1	0.165789	0.604243
O75882	ATRN	-0.0854793	0.60483
Q92673	SORL1	-0.101299	0.605548
P34932	HSPA4	0.116497	0.605615
Q9H257	CARD9	-0.0297698	0.606619
P11940	PABPC1	0.229431	0.606679
Q9Y210	TRPC6	-0.167463	0.606865
P08294	SOD3	-0.0799082	0.607204
P16157	ANK1	-0.111242	0.607213
P13667	PDIA4	-0.101145	0.607289
Q13103	SPP2	0.070918	0.607855
O95445	APOM	-0.103062	0.608547
Q9NPH3	IL1RAP	0.076806	0.608904
P50148	GNAQ	-0.11945	0.609628
Q13683	ITGA7	0.107981	0.609667
Q9Y678	COPG1	-0.195194	0.609759
Q9H497	TOR3A	0.157602	0.611822
Q9UHD8	SEPTIN9	0.201803	0.612373
Q13043	STK4	-0.162884	0.612579
Q08722	CD47	-0.132719	0.61366
P50851	LRBA	-0.141545	0.613756
Q9UJU6	DBNL	-0.111507	0.614296
P00915	CA1	-0.107741	0.614724
Q9H444	CHMP4B	-0.197477	0.615446
A0A0B4J1V2	IGHV2-26	-0.0518602	0.615496
P55103	INHBC	0.0687563	0.615729
O00487	PSMD14	0.104496	0.615823
P01861	IGHG4	0.0278889	0.616236
A0A0C4DH38	IGHV5-51	-0.0536891	0.616788
P28065	PSMB9	0.0893874	0.622073
A0A0J9YX35	IGHV3-64D	-0.0478255	0.622667
P40306	PSMB10	-0.0985599	0.623231
P51884	LUM	-0.0855232	0.623349
Q16836	HADH	0.138514	0.623642
P49748	ACADVL	0.147097	0.623776
P62195	PSMC5	-0.105958	0.625215
Q6ZRP7	QSOX2	-0.0754809	0.626293
Q13418	ILK	-0.106979	0.626329
Q04446	GBE1	0.181129	0.627569
P35916	FLT4	-0.0742841	0.627812
P01275	GCG	0.151114	0.628311
P01591	JCHAIN	-0.0433611	0.628626
Q16853	AOC3	-0.0880102	0.629251
Q9UJJ9	GNPTG	-0.0983522	0.629768
Q96IX5	ATP5MK	0.293475	0.631889
P50991	CCT4	-0.110736	0.632643
P55209	NAP1L1	-0.132709	0.632837
P45974	USP5	0.135182	0.632964
P13647	KRT5	0.105455	0.638343
P22105	TNXB	0.0786844	0.638803
P55884	EIF3B	-0.263466	0.639746
P62191	PSMC1	-0.099555	0.64147
P01876	IGHA1	-0.0709607	0.64191
Q9Y5P6	GMPPB	-0.176849	0.642452
Q99973	TEP1	-0.181391	0.643517
P62736	ACTA2	-0.0908442	0.645387
P10643	C7	0.058078	0.645576
P29622	SERPINA4	0.0694877	0.645751
Q9P270	SLAIN2	0.168224	0.647507
O75688	PPM1B	0.136573	0.647592
Q9UPW5	AGTPBP1	0.0769635	0.650149
P35442	THBS2	0.061589	0.6504
A0A0A0MRZ8;P04433	IGKV3D-11;IGKV3-11	-0.0595133	0.65043
A0A075B6Q5	IGHV3-64	-0.0587104	0.650517
Q14156	EFR3A	0.341916	0.651389
A0A075B6P5;P01615	IGKV2-28;IGKV2D-28	-0.0602207	0.651544
O75531	BANF1	-0.427737	0.65164
Q14242	SELPLG	-0.0867196	0.651759
Q9NRN5	OLFML3	-0.0887657	0.652474
P21980	TGM2	-0.12303	0.6525
Q8TDL5	BPIFB1	0.0543466	0.653135
Q9Y251	HPSE	-0.0906385	0.654294
P08185	SERPINA6	-0.0668465	0.654426
P29692	EEF1D	-0.102526	0.654713
Q86VG3	IFTAP	-0.0688738	0.655843
P60981	DSTN	-0.0964934	0.655853
P61163	ACTR1A	-0.121861	0.656138
P38571	LIPA	-0.0823914	0.656381
P78417	GSTO1	-0.0972088	0.656952
Q13107	USP4	0.12169	0.657181
Q13586	STIM1	0.103889	0.657652
Q8TC12	RDH11	-0.109262	0.657786
P48059	LIMS1	-0.0972162	0.65807
P01859	IGHG2	0.0470787	0.658187
Q13642	FHL1	0.10938	0.6604
O60243	HS6ST1	-0.120627	0.66115
B2RUZ4	SMIM1	-0.109353	0.661152
P22891	PROZ	0.0714016	0.662075
O43493	TGOLN2	0.100763	0.662389
Q9NZP8	C1RL	-0.0696363	0.663273
O75339	CILP	0.0612586	0.663622
O94886	TMEM63A	-0.174417	0.664242
Q92619	ARHGAP45	-0.0954325	0.664565
P08637	FCGR3A	-0.0679415	0.6648
P01772	IGHV3-33	-0.046955	0.665088
Q96IJ6	GMPPA	-0.158751	0.66535
Q13790	APOF	-0.0611663	0.665532
O43529	CHST10	-0.12297	0.667283
P12236	SLC25A6	-0.0973351	0.66751
O00391	QSOX1	0.0747721	0.667616
P13164;Q01628;Q01629	IFITM1;IFITM3;IFITM2	0.080249	0.668127
Q9BWP8	COLEC11	0.0591577	0.66867
P31946	YWHAB	-0.0917508	0.668839
Q9P2X0	DPM3	-0.1183	0.668865
Q04941	PLP2	-0.128097	0.669494
P10412;P16402;P16403	H1-4;H1-3;H1-2	0.0934654	0.669563
Q15828	CST6	-0.110578	0.670907
P17252	PRKCA	0.259782	0.671252
Q15286	RAB35	0.196208	0.67341
Q9GZT8	NIF3L1	-0.0850635	0.673856
Q13200	PSMD2	-0.0914241	0.67388
P68871	HBB	-0.0893743	0.674096
P01019	AGT	-0.0732928	0.674193
P23470	PTPRG	-0.0761176	0.674612
P11234	RALB	-0.0903472	0.675505
P00742	F10	-0.0692686	0.676289
P01599	IGKV1-17	-0.0520873	0.676904
O75356	ENTPD5	-0.087565	0.677788
Q12981	BNIP1	-0.0999199	0.678708
Q96RT1	ERBIN	0.153812	0.679712
Q99460	PSMD1	0.092403	0.680222
Q00577	PURA	0.117714	0.680958
O75368	SH3BGRL	-0.118668	0.681293
O14672	ADAM10	0.0709829	0.682272
P01266	TG	0.102235	0.682631
Q9UPN3	MACF1	-0.123436	0.682756
P15941	MUC1	0.128231	0.683021
O00461	GOLIM4	0.0707617	0.683232
Q9NQU5	PAK6	-0.0543069	0.683602
Q9BXJ4	C1QTNF3	0.0728852	0.684437
P50336	PPOX	0.112876	0.684791
Q8TD55	PLEKHO2	0.122406	0.685307
P04180	LCAT	-0.0807353	0.68533
P63241	EIF5A	-0.0868477	0.685807
Q9UBQ7	GRHPR	-0.182124	0.685909
Q709C8	VPS13C	0.184783	0.686124
Q8WUT4	LRRN4	-0.0530474	0.686181
P07686	HEXB	0.104418	0.68858
A0A0C4DH31	IGHV1-18	0.0422614	0.688982
P07437	TUBB	-0.0860388	0.689271
P26572	MGAT1	0.0810801	0.690465
O43157	PLXNB1	0.0621778	0.690644
P06276	BCHE	-0.0458127	0.691461
Q6VY07	PACS1	-0.182952	0.692007
P46531	NOTCH1	-0.0978912	0.692781
P49411	TUFM	-0.1196	0.693717
Q13423	NNT	-0.0969625	0.693982
P02760	AMBP	0.0669292	0.694164
Q9BYH1	SEZ6L	-0.0615372	0.695353
Q16851	UGP2	-0.0861188	0.695431
Q15018	ABRAXAS2	0.175785	0.695648
P30153	PPP2R1A	-0.0854639	0.695731
Q15366	PCBP2	0.117767	0.695791
A0A087WSX0	IGLV5-45	-0.0290305	0.696717
Q07866	KLC1	0.182988	0.697076
P05109	S100A8	-0.0708871	0.697882
P13645	KRT10	-0.0709948	0.698579
O15240	VGF	-0.0911331	0.69901
Q9Y696	CLIC4	-0.102591	0.699866
O94919	ENDOD1	-0.0964398	0.700328
Q8WUJ3	CEMIP	-0.055099	0.702528
Q92614	MYO18A	-0.118315	0.702585
Q6XQN6	NAPRT	-0.14122	0.703217
Q12805	EFEMP1	-0.0588841	0.703363
Q9NVK5	FGFR1OP2	0.120574	0.703393
Q8IZF2	ADGRF5	-0.0571381	0.704546
P35527	KRT9	-0.0708321	0.704939
Q8IUI8	CRLF3	-0.192341	0.705035
Q9UKG1	APPL1	0.27131	0.705927
Q7L5N1	COPS6	0.141923	0.706297
P0DPH7;P0DPH8	TUBA3C;TUBA3D	-0.16214	0.706308
P53618	COPB1	0.142017	0.706309
P01717	IGLV3-25	0.0591402	0.706786
Q93070	ART4	0.128245	0.70755
Q9Y265	RUVBL1	-0.343008	0.708841
P10321	HLA-C	-0.0607726	0.709007
P07942	LAMB1	0.0567764	0.712164
P19086	GNAZ	-0.0900517	0.714398
P49747	COMP	-0.0470625	0.715913
O76074	PDE5A	-0.0877614	0.7174
P06396	GSN	0.0647914	0.717833
P22314	UBA1	-0.0916994	0.718036
Q9BSJ8	ESYT1	-0.122614	0.718595
P55001	MFAP2	-0.0772504	0.719583
Q9HCN6	GP6	0.09952	0.720066
P15814	IGLL1	-0.0570915	0.720397
Q8WXF7	ATL1	0.177601	0.720629
Q5BLP8	NICOL1	-0.135061	0.721528
Q9H2U2	PPA2	0.101624	0.721652
Q9UBS9	SUCO	0.1372	0.722691
Q9UEY8	ADD3	0.118043	0.723665
P43652	AFM	-0.0629515	0.723892
P02452	COL1A1	-0.0932748	0.724316
P15153;P60763;P63000	RAC2;RAC3;RAC1	-0.083262	0.725076
P09603	CSF1	0.0604132	0.725689
P09038	FGF2	0.0583635	0.726444
Q9UNH7	SNX6	-0.166116	0.726859
Q14847	LASP1	-0.0888722	0.728064
P07858	CTSB	0.055112	0.72936
P06744	GPI	-0.0795719	0.730419
P19883	FST	-0.0641676	0.73145
P61626	LYZ	-0.0503351	0.731819
Q5H9R7	PPP6R3	0.0965494	0.733772
P40925	MDH1	0.0684306	0.735099
P06737	PYGL	-0.14652	0.735357
Q9GZM7	TINAGL1	-0.0903808	0.735628
Q15465	SHH	0.0750079	0.736339
P21399	ACO1	0.390396	0.736347
Q8TCT9	HM13	-0.138704	0.737296
Q6UXH0	ANGPTL8	0.0584336	0.737367
Q9ULI3	HEG1	-0.0726458	0.737442
O43405	COCH	-0.0992396	0.73773
A0A0C4DH25	IGKV3D-20	-0.0380139	0.738025
Q9BTV4	TMEM43	-0.155948	0.73813
Q96FE7	PIK3IP1	0.0661395	0.741236
Q9Y3Q8	TSC22D4	-0.139841	0.741275
Q8NEV4	MYO3A	0.0993701	0.741383
P12259	F5	-0.0462205	0.741553
Q05193	DNM1	0.126832	0.741761
P04217	A1BG	-0.0568797	0.742755
Q13415	ORC1	-0.191821	0.742842
P10646	TFPI	0.0626967	0.74346
P62805	H4C1	0.0405691	0.744011
P55060	CSE1L	-0.118324	0.744667
A0A075B6K0	IGLV3-16	0.0378791	0.744965
Q9BR76	CORO1B	-0.0949643	0.745071
A0A0C4DH73;P01611	IGKV1-12;IGKV1D-12	0.0466111	0.745373
P42704	LRPPRC	-0.156452	0.74567
Q9BQE3	TUBA1C	-0.102952	0.746621
P50995	ANXA11	0.276911	0.747876
Q9Y6Z7	COLEC10	0.0380711	0.748404
P22694	PRKACB	0.0963074	0.748619
O14744	PRMT5	0.200957	0.748631
Q96S38	RPS6KC1	0.0488114	0.748914
Q9Y608	LRRFIP2	-0.112363	0.749478
Q9UBC2	EPS15L1	-0.112198	0.750184
P10599	TXN	-0.0969416	0.750699
P35908	KRT2	-0.0638003	0.751543
P98066	TNFAIP6	-0.0649212	0.751555
Q9UIA9	XPO7	-0.089189	0.753768
Q92882	OSTF1	-0.134465	0.754055
Q9H2M9	RAB3GAP2	0.187257	0.754185
Q9Y3A6	TMED5	-0.236468	0.755351
P54819	AK2	0.101561	0.756496
P04844	RPN2	0.109235	0.757167
Q5JRA6	MIA3	0.0557752	0.75755
P04070	PROC	0.0520765	0.757809
A2NJV5	IGKV2-29	0.0246571	0.757925
Q9BV40	VAMP8	-0.275102	0.7582
P13073	COX4I1	-0.0798357	0.758686
Q9NYU2	UGGT1	-0.0659252	0.759086
P69892	HBG2	0.0465732	0.759444
Q13576	IQGAP2	-0.0677826	0.761427
Q07283	TCHH	0.0961405	0.761647
Q93034	CUL5	0.10099	0.762259
P49746	THBS3	0.0415054	0.765485
P62937	PPIA	-0.0647594	0.766222
P50395	GDI2	-0.0642911	0.76674
P00740	F9	-0.0498917	0.768425
Q68CP9	ARID2	-0.112119	0.770386
Q9Y240	CLEC11A	0.0374121	0.770798
Q14BN4	SLMAP	0.131223	0.772124
P02533	KRT14	-0.0547801	0.772192
Q70J99	UNC13D	0.0696913	0.77404
Q9NR31	SAR1A	-0.0614441	0.775154
Q8NG06	TRIM58	-0.0844504	0.776091
P13727	PRG2	-0.0291575	0.777634
P09172	DBH	-0.0354305	0.777729
O15143	ARPC1B	-0.0616921	0.778751
Q8NE86	MCU	-0.113964	0.780577
O43681	GET3	0.0615892	0.781137
Q9UPU5	USP24	-0.0602874	0.781499
Q7KZF4	SND1	-0.0898307	0.783178
Q96KP4	CNDP2	0.0853947	0.783738
Q86UD1	OAF	-0.0418379	0.784848
P07741	APRT	-0.0642578	0.785601
P20073	ANXA7	-0.108524	0.786541
Q14344	GNA13	0.0916522	0.786785
Q14624	ITIH4	-0.0391665	0.786889
P51665	PSMD7	0.0617721	0.787052
A0A0C4DH43	IGHV2-70D	0.0511616	0.788295
Q9BUN1	MENT	0.0543915	0.78866
P20674	COX5A	-0.118857	0.788717
P21796	VDAC1	0.0683485	0.789071
Q8IZ83	ALDH16A1	0.149087	0.789567
Q9UNM6	PSMD13	0.0565567	0.790594
P14543	NID1	-0.0455961	0.791985
P01764	IGHV3-23	-0.0395152	0.792199
Q9BS26	ERP44	-0.0578077	0.792633
P06312	IGKV4-1	0.0287805	0.794127
Q9Y4I1	MYO5A	0.115888	0.794365
Q9NXH8	TOR4A	0.0857422	0.796317
P55287	CDH11	0.0436118	0.796696
Q9H159	CDH19	0.0258759	0.796764
P52907	CAPZA1	-0.0584542	0.798066
P43034	PAFAH1B1	0.114951	0.798451
Q01469	FABP5	0.117576	0.798907
Q8WWV6	FCAMR	0.0353774	0.799319
P02765	AHSG	-0.0356984	0.80056
Q7Z5L0	VMO1	-0.069217	0.801021
P50402	EMD	-0.0731346	0.801273
P00734	F2	0.0371954	0.802623
P35052	GPC1	-0.0584175	0.803886
Q9NQ79	CRTAC1	-0.0338733	0.803893
O95870	ABHD16A	-0.0600192	0.804043
P80748	IGLV3-21	0.0357266	0.804134
Q8TF42	UBASH3B	0.0897324	0.804204
O75390	CS	0.0673248	0.80615
Q9BYJ0	FGFBP2	0.058103	0.806677
Q8NF50	DOCK8	0.124051	0.806976
O75298	RTN2	0.085178	0.807288
O75309	CDH16	-0.041175	0.808296
P84085	ARF5	-0.0508503	0.810456
P51572	BCAP31	-0.0580813	0.811981
Q08431	MFGE8	-0.0516747	0.811986
P10124	SRGN	-0.0515367	0.812721
P0DJI9	SAA2	0.0856962	0.813436
P04066	FUCA1	-0.0648417	0.816433
P13861	PRKAR2A	0.0745219	0.816951
Q14766	LTBP1	0.0496207	0.818457
Q92859	NEO1	-0.0338542	0.820061
Q9UNW1	MINPP1	-0.0401127	0.821293
Q9H2G2	SLK	0.058495	0.821482
A0A0C4DH36	IGHV3-38	-0.0318212	0.822209
Q12841	FSTL1	0.0478762	0.822529
P04259	KRT6B	-0.111293	0.82399
P01624	IGKV3-15	-0.0189465	0.825101
O00410	IPO5	-0.0538481	0.827381
Q9Y279	VSIG4	-0.0462489	0.827606
P05164	MPO	-0.0665586	0.827607
Q8NFD2	ANKK1	-0.096587	0.828326
Q8N392	ARHGAP18	0.0507274	0.829555
Q04756	HGFAC	-0.0374753	0.829585
P37837	TALDO1	0.0491596	0.829862
O15427	SLC16A3	0.0696848	0.832161
Q15113	PCOLCE	0.0383127	0.832165
P19971	TYMP	0.0516938	0.832348
Q3LXA3	TKFC	-0.0681752	0.834529
P61006	RAB8A	0.0461842	0.834565
Q16610	ECM1	0.0369358	0.834836
Q15848	ADIPOQ	-0.0245953	0.834845
Q8TAF8	LHFPL5	0.0520085	0.836381
P16885	PLCG2	-0.0819205	0.836853
Q5JSH3	WDR44	0.0458755	0.837147
A0A087WSY6	IGKV3D-15	0.015571	0.839166
Q8WXE9	STON2	-0.0886258	0.839858
P00846	MT-ATP6	0.0818088	0.841528
Q9UQP3	TNN	-0.0550189	0.842583
Q9Y3I1	FBXO7	0.0556706	0.842664
Q15582	TGFBI	-0.0256283	0.842683
O00483	NDUFA4	0.087752	0.843597
O00429	DNM1L	-0.0424197	0.845287
Q6EMK4	VASN	0.0346083	0.846336
Q08554	DSC1	0.0747643	0.847812
P54920	NAPA	0.0682589	0.848605
P11717	IGF2R	-0.0329643	0.848743
O95897	OLFM2	-0.0601486	0.849487
Q96IY4	CPB2	-0.0307598	0.849575
A0A075B6I9	IGLV7-46	-0.0166266	0.850566
Q9HCU0	CD248	0.0309054	0.850661
O43169	CYB5B	-0.107838	0.850848
O15260	SURF4	0.0871392	0.851678
P36955	SERPINF1	0.0305318	0.852011
Q86WI1	PKHD1L1	-0.0193746	0.85248
Q9NP72	RAB18	0.0465053	0.852897
Q6IBS0	TWF2	0.0672606	0.853129
Q9H6R0	DHX33	-0.05178	0.853781
P01860	IGHG3	-0.0134625	0.854219
Q15833	STXBP2	-0.0425561	0.854239
Q9UEW3	MARCO	-0.0331259	0.855125
O15173	PGRMC2	-0.0525291	0.8578
P31948	STIP1	0.048216	0.858132
P55157	MTTP	-0.0268068	0.858367
P25789	PSMA4	-0.0310135	0.858418
P15151	PVR	-0.0344923	0.858564
P24821	TNC	0.0181657	0.858835
P00746	CFD	0.0372749	0.858887
Q14956	GPNMB	0.035925	0.860101
Q9NR12	PDLIM7	0.0473092	0.860683
O95373	IPO7	0.0440511	0.861537
P30043	BLVRB	0.0372584	0.863256
Q99829	CPNE1	0.117215	0.863259
P78344	EIF4G2	0.0488075	0.863889
Q02153	GUCY1B1	-0.0649557	0.864661
Q9Y6C2	EMILIN1	-0.0379708	0.864825
P02749	APOH	-0.0287025	0.865037
O14791	APOL1	-0.026336	0.86627
P09486	SPARC	-0.0333779	0.867572
O14974	PPP1R12A	0.061578	0.867575
Q9NRB3	CHST12	-0.0418545	0.867639
P11310	ACADM	-0.053682	0.867734
O60462	NRP2	0.0302579	0.868471
P16070	CD44	-0.0255902	0.869059
Q15008	PSMD6	-0.041401	0.869367
P02745	C1QA	-0.029186	0.869887
P99999	CYCS	-0.0407453	0.87112
P02746	C1QB	0.0255423	0.871149
P63316	TNNC1	-0.0373134	0.87119
P06331	IGHV4-34	-0.0260924	0.871197
Q99685	MGLL	0.0612463	0.871303
A0A087WW87;P01614	IGKV2-40;IGKV2D-40	0.0193596	0.871865
Q7Z6Z7	HUWE1	-0.0375426	0.871894
Q9Y6N5	SQOR	0.0750793	0.872921
P42229	STAT5A	-0.0562161	0.873587
O95967	EFEMP2	0.0307782	0.873591
P07996	THBS1	-0.0338409	0.875278
P80303	NUCB2	-0.0380173	0.875702
P01742	IGHV1-69	-0.018705	0.876568
P62136	PPP1CA	-0.0440729	0.881962
O94769	ECM2	-0.0184977	0.882402
Q9H299	SH3BGRL3	0.0337068	0.882501
Q13094	LCP2	0.0354294	0.882623
P0DOX8		0.0228782	0.882787
Q9HBW9	ADGRL4	-0.0193204	0.883521
O00505	KPNA3	0.0473761	0.883606
P22061	PCMT1	-0.0293581	0.883843
P49913	CAMP	-0.0166796	0.884329
P29144	TPP2	-0.0340364	0.884549
Q12906	ILF3	-0.0298851	0.884582
P13501	CCL5	-0.0511411	0.884621
P01593;P01594	IGKV1D-33;IGKV1-33	0.0203108	0.884988
Q86SQ4	ADGRG6	-0.0254557	0.885168
P25311	AZGP1	0.0231416	0.887762
Q9UNF1	MAGED2	-0.0464333	0.887997
Q7Z4R8	C6orf120	0.0732564	0.888536
Q9UK55	SERPINA10	-0.0204707	0.890559
P41226	UBA7	-0.0576081	0.890951
O75352	MPDU1	0.0613069	0.891602
P04746	AMY2A	0.0613139	0.892606
P48047	ATP5PO	0.0385193	0.892777
P19022	CDH2	-0.0249276	0.893368
A0A0C4DH33	IGHV1-24	-0.0137064	0.893386
Q12907	LMAN2	-0.0279972	0.894475
E9PAV3;Q13765	NACA	0.070022	0.895657
P02751	FN1	0.021805	0.896181
Q9UNF0	PACSIN2	0.0460443	0.896398
Q92743	HTRA1	-0.0292439	0.896532
P55285	CDH6	-0.0224306	0.896853
P10632;P33260	CYP2C8;CYP2C18	-0.0375827	0.897771
P32942	ICAM3	0.0162763	0.897882
Q86TY3	ARMH4	0.0266976	0.89931
P36980	CFHR2	-0.0197811	0.89944
Q06033	ITIH3	-0.0149777	0.899458
Q9NVJ2	ARL8B	-0.0503756	0.899492
Q96S97	MYADM	0.0341836	0.899625
Q16543	CDC37	-0.0355934	0.899641
Q05209	PTPN12	-0.0382382	0.902932
Q9NT62	ATG3	-0.0387613	0.903706
P16615	ATP2A2	0.0312844	0.904012
P05362	ICAM1	-0.0223655	0.904643
A0A075B6S2	IGKV2D-29	-0.00952061	0.905144
O95292	VAPB	-0.0821669	0.905448
P01782;P0DP04	IGHV3-9;IGHV3-43D	-0.0116929	0.906005
P01703	IGLV1-40	-0.0243361	0.906347
P04430	IGKV1-16	0.0168263	0.907026
Q5T447	HECTD3	0.0596491	0.907458
Q96DZ9	CMTM5	0.0348261	0.908754
Q8NI99	ANGPTL6	-0.0102849	0.908767
P0DOX5		0.0135626	0.908879
P43487	RANBP1	-0.0387871	0.90936
P50454	SERPINH1	0.0633087	0.909578
P61026	RAB10	-0.0268352	0.909598
P98095	FBLN2	0.0221418	0.909941
Q08397	LOXL1	-0.069571	0.910115
O43488	AKR7A2	0.034458	0.911071
Q9NPG4	PCDH12	-0.0211248	0.911541
Q9UIJ7	AK3	0.0548285	0.911551
P0DOX3		-0.0138776	0.912147
P61586	RHOA	0.0267728	0.912301
Q13637	RAB32	0.0412289	0.912365
Q16181	SEPTIN7	0.0506867	0.913595
Q96AX2	RAB37	0.0318852	0.914477
P0C7P3	SLFN14	0.0763558	0.914802
P43686	PSMC4	-0.0260658	0.915417
P02768	ALB	-0.016815	0.915462
O75563	SKAP2	0.028215	0.915539
P04908;P0C0S5;P0C0S8;P16104;P20671;Q16777;Q6FI13;Q71UI9;Q7L7L0;Q8IUE6;Q93077;Q96KK5;Q96QV6;Q99878;Q9BTM1	H2AC4;H2AZ1;H2AC11;H2AX;H2AC7;H2AC20;H2AC18;H2AZ2;H2AC25;H2AC21;H2AC6;H2AC12;H2AC1;H2AC14;H2AJ	0.0207448	0.915752
O95716	RAB3D	0.0729097	0.917647
P01040	CSTA	0.037112	0.91805
Q14C86	GAPVD1	0.0252538	0.919067
O43149	ZZEF1	-0.0442678	0.919821
P09960	LTA4H	-0.0207613	0.921274
P14625	HSP90B1	0.0137116	0.921552
P35914	HMGCL	0.0594017	0.921796
P57729	RAB38	0.0351609	0.92424
O43815	STRN	-0.0364372	0.925213
P19827	ITIH1	-0.0156507	0.927147
Q86TH1	ADAMTSL2	0.0167315	0.927716
O15400	STX7	0.0415776	0.928306
P31150	GDI1	-0.0222195	0.929666
Q9UP79	ADAMTS8	-0.017173	0.930533
O60313	OPA1	0.0393519	0.931096
O94804	STK10	-0.0371271	0.931738
P36542	ATP5F1C	-0.0299483	0.93348
Q9H251	CDH23	-0.0103187	0.933646
P0DOX7		0.0087224	0.934124
P02790	HPX	0.0136057	0.935734
Q32P28	P3H1	0.0164792	0.935736
P24593	IGFBP5	0.0156563	0.937119
Q96G03	PGM2	-0.0323387	0.938307
O60645	EXOC3	-0.0225925	0.939882
P57088	TMEM33	0.0327228	0.940609
O95479	H6PD	0.0147524	0.94077
P02654	APOC1	-0.0106652	0.940821
Q93008	USP9X	0.0177032	0.940973
Q8NBF2	NHLRC2	-0.0282405	0.941738
Q9Y274	ST3GAL6	-0.0159757	0.9422
P54725	RAD23A	0.0209212	0.943482
Q6Q788	APOA5	-0.010296	0.943492
P28074	PSMB5	0.0092938	0.943667
Q5SQ64	LY6G6F	0.0166952	0.945706
P22695	UQCRC2	0.024028	0.946151
Q9UBX5	FBLN5	-0.0116997	0.947092
P03951	F11	0.00859229	0.947669
Q08209	PPP3CA	-0.0202542	0.947759
P36873	PPP1CC	0.0221768	0.948376
O60488	ACSL4	-0.00835673	0.949299
P10606	COX5B	0.0159159	0.950312
O43312	MTSS1	0.0334776	0.950725
Q9Y5Y7	LYVE1	0.0119292	0.951597
Q9C0C9	UBE2O	0.0130066	0.952228
Q6UWZ7	ABRAXAS1	0.0244444	0.952301
Q8WXK3	ASB13	-0.0156603	0.952855
Q9HCL0	PCDH18	0.00987538	0.955114
Q8N6M9	ZFAND2A	-0.0121369	0.955309
Q5U651	RASIP1	-0.00992382	0.955752
Q8NBM8	PCYOX1L	0.0166582	0.956547
P11362	FGFR1	0.0102295	0.957683
P21731	TBXA2R	0.021635	0.958228
O60763	USO1	-0.0186629	0.958293
Q14155	ARHGEF7	-0.0384186	0.958411
P43304	GPD2	0.0119174	0.960084
P27816	MAP4	-0.0250093	0.960265
Q13011	ECH1	-0.0150533	0.960528
O95497	VNN1	-0.00794331	0.961077
P41240	CSK	-0.0123155	0.961797
O00468	AGRN	-0.00819037	0.962103
P01709	IGLV2-8	-0.00319036	0.96255
Q9UHB6	LIMA1	0.01382	0.96317
O15117	FYB1	0.00981725	0.965153
Q9BUF5	TUBB6	0.0136966	0.966434
P42574	CASP3	-0.0204561	0.967214
Q9C0I1	MTMR12	-0.223422	0.967737
Q9NQW7	XPNPEP1	0.0123871	0.968013
Q9H425	C1orf198	-0.027959	0.968055
Q5T4S7	UBR4	-0.00923913	0.968531
A0A075B6R9;A0A0C4DH68	IGKV2D-24;IGKV2-24	0.00311059	0.969079
Q9Y287	ITM2B	0.00760779	0.969525
P10451	SPP1	0.0066672	0.971492
P23083	IGHV1-2	0.00390703	0.972071
A0A087WSZ0	IGKV1D-8	-0.00495749	0.972176
Q01459	CTBS	0.0115241	0.97234
P24723	PRKCH	0.00961682	0.973464
O75947	ATP5PD	-0.00972311	0.973479
Q16881	TXNRD1	0.0115129	0.973702
Q9Y646	CPQ	0.00570349	0.974372
Q06187	BTK	0.00872987	0.975575
Q9NP78	ABCB9	-0.00511514	0.976381
P01704	IGLV2-14	-0.00645233	0.976594
Q12913	PTPRJ	-0.00466925	0.977466
P00558	PGK1	0.00647597	0.977628
A0A0C4DH35	IGHV3-35	-0.0036756	0.978546
Q12905	ILF2	0.00485158	0.980993
Q92570	NR4A3	-0.00560401	0.981443
P06756	ITGAV	0.00912172	0.983235
Q9H8W5	TRIM45	-0.00223027	0.983714
Q14554	PDIA5	0.006019	0.984358
Q9UBE0	SAE1	-0.00312941	0.984953
Q14165	MLEC	0.00517777	0.985569
P24347	MMP11	0.00327262	0.985576
O43852	CALU	-0.00385698	0.98568
Q14642	INPP5A	0.00554896	0.986552
P21926	CD9	0.00377827	0.986886
Q14643	ITPR1	-0.00604007	0.986989
Q9UHG3	PCYOX1	0.00251083	0.987869
P78527	PRKDC	-0.00311838	0.98821
P08069	IGF1R	-0.00675971	0.989264
O14618	CCS	0.00389422	0.98951
Q14574	DSC3	0.00436685	0.990465
P09104	ENO2	-0.00524439	0.990598
O60496	DOK2	0.00414796	0.991958
P52306	RAP1GDS1	0.00534533	0.992035
Q04695	KRT17	-0.00282597	0.99356
Q06828	FMOD	0.00157954	0.993761
Q99733	NAP1L4	0.0015772	0.994372
P01700	IGLV1-47	-0.000718599	0.994615
Q6UX71	PLXDC2	0.00108032	0.994703
Q9H4A3	WNK1	0.0047972	0.995679
P13671	C6	-0.000940458	0.99585
P58166	INHBE	0.000564278	0.996298
P22352	GPX3	-0.000552446	0.996668
P23467	PTPRB	-0.00211883	0.99698
Q9BRK5	SDF4	-0.000687809	0.9971
Q9UL25	RAB21	-0.00122896	0.997452
P08195	SLC3A2	0.000227579	0.998799
P0CG23	ZNF853	-5.05504e-05	0.999834
O75822	EIF3J	1.06339e-05	0.999965
P52209	PGD	8.6956e-06	0.999969
Q9UHQ4	BCAP29	0.0596213	1
Q99683	MAP3K5	0	1
Q9HCM2	PLXNA4	0	1
Q9Y315	DERA	0	1
O60749	SNX2
O94826	TOMM70	0.139522
P09093	CELA3A	-0.745811
P15085	CPA1
P30626	SRI
Q12912	IRAG2
Q5VWC8	HACD4
Q9HB40	SCPEP1
Q9HCL2	GPAM
Q9UDT6	CLIP2
Q9UKE5	TNIK

## Sheet: Olink
ProteinID	GeneID	Estimate	P_value
Q9ULX7	CA14	1.07968	1.02338e-14
Q9UKY0	PRND	0.929966	5.62229e-07
Q9BYE9	CDHR2	-0.323262	7.41831e-07
Q9NPY3	CD93	0.836656	1.0037e-06
P13686	ACP5	-0.440335	8.83672e-06
P16581	SELE	-0.413587	1.92986e-05
P43489	TNFRSF4	0.6204	2.82299e-05
O15123	ANGPT2	0.463986	4.58997e-05
Q8TED9	AFAP1L1	0.618934	6.80871e-05
Q7Z7G0	ABI3BP	-0.33351	0.00017137
Q6UXG3	CD300LG	0.502328	0.000186664
P02786	TFRC	0.458593	0.000239797
Q86T13	CLEC14A	0.408356	0.000280355
Q8WTU2	SSC4D	-0.168365	0.000330797
Q9UJA9	ENPP5	0.21007	0.000335288
Q8WWV6	FCAMR	-0.288626	0.000357464
O14793	MSTN	-0.361893	0.000366695
P42785	PRCP	-0.360369	0.000420611
P11464	PSG1	0.129767	0.000574555
Q6UX15	LAYN	0.467732	0.000615766
Q9Y250	LZTS1	0.605821	0.000680499
Q16549	PCSK7	-0.157072	0.000810338
A1L4H1	SSC5D	-0.480147	0.000881103
Q8IV16	GPIHBP1	0.429867	0.000947099
Q5VWQ8	DAB2IP	-0.36617	0.00101052
Q8IW00	VSTM4	0.343978	0.00102722
Q16363	LAMA4	0.571273	0.00104491
Q13093	PLA2G7	-0.345181	0.00105017
O95497	VNN1	-0.190388	0.00160627
Q6IC83	C22orf42	-0.494782	0.00168819
Q9P232	CNTN3	-0.352115	0.00169471
P27918	CFP	-0.452147	0.00176814
P07306	ASGR1	-0.382152	0.00196843
P33151	CDH5	0.428528	0.00213414
P30039	PBLD	-0.434899	0.00213542
P23280	CA6	0.324215	0.00230113
Q9UJC3	HOOK1	-0.608502	0.00232749
Q15262	PTPRK	-0.588955	0.00267783
P51649	ALDH5A1	-0.515483	0.00310911
P01241	GH1	0.449198	0.0031126
O15033	AREL1	-0.379581	0.00323233
Q15485	FCN2	-0.37153	0.0036166
Q8N0V3	RBFA	-0.603035	0.00371477
Q13478	IL18R1	-0.339428	0.00418215
P05154	SERPINA5	-0.495525	0.00437619
Q6ZMV9	KIF6	0.40323	0.00443031
Q86VR7	VSIG10L	0.436416	0.00479775
Q6UWV6	ENPP7	-0.18673	0.00494368
P02462	COL4A1	0.303098	0.0051886
P30838	ALDH3A1	-0.383366	0.00520952
Q14246	ADGRE1	-0.328863	0.00589342
P00325	ADH1B	-0.376339	0.00593577
Q86U10	ASPG	-0.496579	0.00622758
Q96AP7	ESAM	0.351273	0.00640958
P82980	RBP5	-0.393214	0.00656374
Q2TAL6	VWC2	-0.320439	0.00696893
Q86W50	METTL16	0.556129	0.00702351
P08263	GSTA1	-0.329051	0.00707332
Q6UVK1	CSPG4	0.327019	0.00739214
Q9NTU7	CBLN4	-0.163992	0.00754505
P50053	KHK	-0.35336	0.00782717
O14904	WNT9A	0.348042	0.00791357
P05783	KRT18	-0.288822	0.00795756
Q8WV41	SNX33	-0.472891	0.00803571
P02743	APCS	-0.445616	0.00815024
P23141	CES1	-0.274993	0.00833491
P08758	ANXA5	-0.577913	0.00833492
Q9HAW4	CLSPN	0.496749	0.00840881
P43121	MCAM	0.425358	0.00858939
Q9NRP4	SDHAF3	-0.537268	0.00867346
O75054	IGSF3	-0.367087	0.00899264
P0C862	C1QTNF9	0.248823	0.00931328
Q86VB7	CD163	-0.249359	0.0094069
Q08380	LGALS3BP	-0.240498	0.00954684
O95954	FTCD	-0.344898	0.010383
Q13410	BTN1A1	-0.241184	0.0103877
Q9NSK7	C19orf12	-0.314188	0.0104078
Q9H3U7	SMOC2	0.391465	0.0107667
O94762	RECQL5	-0.43988	0.0111166
Q8NC01	CLEC1A	0.327671	0.0116971
Q9NZK5	ADA2	-0.294253	0.0120563
O43909	EXTL3	-0.39366	0.0122517
Q9NUP7	TRMT13	-0.545769	0.012418
Q6ZMH5	SLC39A5	-0.33781	0.0124566
O60641	SNAP91	-0.445602	0.0126656
Q96MC2	DRC1	0.469285	0.0132317
Q16772	GSTA3	-0.341146	0.0133442
O60895	RAMP2	0.503032	0.0138202
P01130	LDLR	-0.23005	0.0139223
O60635	TSPAN1	-0.188249	0.0139854
Q09666	AHNAK	-0.423043	0.0140625
Q9UIW0	VAX2	0.45174	0.0141724
O95905	ECD	-0.536288	0.0143305
Q6P5Q4	LMOD2	-0.490652	0.0144115
Q9H4D0	CLSTN2	0.323406	0.0146674
Q02641	CACNB1	0.481901	0.0147188
P09496	CLTA	-0.513311	0.0152567
Q8NEZ4	KMT2C	-0.409085	0.0153786
Q8N608	DPP10	-0.188433	0.0155668
P04278	SHBG	0.223915	0.0156311
P32754	HPD	-0.313559	0.0157304
P40198	CEACAM3	-0.43411	0.0157325
Q16719	KYNU	-0.297301	0.0158029
A2VDF0	FUOM	-0.365759	0.01602
P48307	TFPI2	0.310326	0.0163833
Q9BXF3	CECR2	-0.45709	0.0165422
P14151	SELL	-0.298813	0.0166775
Q9Y4X4	KLF12	-0.420931	0.0167721
P21709	EPHA1	-0.354732	0.0169173
Q8NEJ9	NGDN	-0.433656	0.0169833
P57087	JAM2	0.398132	0.0170363
Q5T0F9	CC2D1B	-0.305244	0.0174594
Q1L6U9	MSMP	-0.254347	0.0174957
Q9BUT1	BDH2	-0.413498	0.0178766
P10586	PTPRF	-0.328919	0.0179003
P62760	VSNL1	-0.298811	0.0185428
P98160	HSPG2	0.42313	0.0188886
2	IFNA1	-0.497513	0.0190426
Q9NYZ4	SIGLEC8	-0.193309	0.0195197
P06850	CRH	0.283962	0.0195948
Q9BXD5	NPL	-0.340965	0.0199806
P19440	GGT1	-0.241371	0.0200771
Q9ULK2	ATXN7L1	-0.372579	0.0201237
Q96I15	SCLY	-0.30092	0.020146
P05156	CFI	-0.381275	0.0205992
Q9H173	SIL1	-0.218753	0.020825
4	IL12A	-0.192939	0.0208561
Q9Y2T7	YBX2	-0.432313	0.0210037
P01833	PIGR	-0.166885	0.0210621
Q96M66	YP010	-0.432154	0.0211087
Q68EM7	ARHGAP17	-0.4923	0.0214191
P01298	PPY	0.197331	0.0215336
Q9BWW9	APOL5	0.370851	0.0216243
Q9Y275	TNFSF13B	-0.281909	0.0217773
Q8N6Q3	CD177	-0.116613	0.0218425
P61457	PCBD1	-0.376354	0.0219249
P17813	ENG	0.367824	0.0220926
O75077	ADAM23	0.208817	0.0221139
Q03167	TGFBR3	0.400255	0.0222489
Q8N743	KIR3DL3	-0.50774	0.02243
P08319	ADH4	-0.327804	0.0225081
Q2VWP7	PRTG	0.28839	0.0227138
Q6UXB4	CLEC4G	-0.421737	0.0227369
Q9HC56	PCDH9	0.311553	0.0229809
P20783	NTF3	0.347232	0.0232171
A6NGS2	ERICH4	-0.14893	0.0232894
Q8TD26	CHD6	-0.434937	0.023362
P48775	TDO2	0.470608	0.0240964
Q9Y2F9	BTBD3	0.459295	0.0241368
P41218	MNDA	-0.450866	0.0250836
P10912	GHR	-0.237572	0.0253532
P12034	FGF5	0.232639	0.0255775
Q9UNE2	RPH3AL	-0.307483	0.025714
O14786	NRP1	0.305546	0.0258771
Q14002	CEACAM7	-0.476996	0.0260745
P26022	PTX3	0.316487	0.0260766
P38484	IFNGR2	-0.165473	0.0265264
Q8NFG4	FLCN	-0.484769	0.027194
P13591	NCAM1	-0.326171	0.0277037
Q9UEW3	MARCO	-0.337282	0.0278896
Q8NBZ9	NEXN-AS1	-0.445373	0.0284148
A6NFN3	RBFOX3	0.315713	0.0287388
Q96B86	RGMA	0.28183	0.0289177
Q10571	MN1	-0.360459	0.0291849
Q9UJG1	MOSPD1	0.43628	0.0293146
P21583	KITLG	0.341068	0.0298987
Q7L590	MCM10	0.43815	0.0299465
Q2L4Q9	PRSS53	-0.195007	0.0299803
P08254	MMP3	0.29383	0.0300271
O75475	PSIP1	-0.336493	0.0300756
Q96PX6	CCDC85A	0.306967	0.03021
Q6ZWK4	RHEX	-0.439964	0.0304696
P28845	HSD11B1	0.201283	0.0308225
P21860	ERBB3	-0.29468	0.0308472
P09564	CD7	-0.285667	0.0308719
P56279	TCL1A	-0.135533	0.0308788
P20273	CD22	-0.227083	0.0310041
O75947	ATP5PD	0.421208	0.0311794
P50120	RBP2	0.294562	0.031456
Q12905	ILF2	0.358967	0.0315914
Q8TEU8	WFIKKN2	0.227795	0.0319619
P23276	KEL	-0.189064	0.0324294
Q9GZV1	ANKRD2	-0.287779	0.03272
Q9NTJ3	SMC4	-0.197753	0.0327586
Q9UMR7	CLEC4A	0.279003	0.0328192
P17302	GJA1	-0.279061	0.0330973
Q9UM47	NOTCH3	0.289425	0.0331674
Q14126	DSG2	0.339858	0.0332032
Q9H2W6	MRPL46	-0.43925	0.0334835
Q8N149	LILRA2	-0.277746	0.033719
Q9Y6X9	MORC2	-0.423008	0.0343854
Q06520	SULT2A1	-0.30554	0.0347194
Q96HR3	MED30	0.352784	0.0350599
Q6DT37	CDC42BPG	-0.296648	0.035163
Q86SX6	GLRX5	-0.367899	0.0356521
Q6UXV0	GFRAL	-0.246607	0.035826
P62736	ACTA2	0.248207	0.0363021
Q13576	IQGAP2	-0.425368	0.03651
Q9UBG3	CRNN	-0.194837	0.0368342
Q96C92	ENTR1	-0.268085	0.0370555
Q53S99	C2orf83	-0.396063	0.0375305
Q16877	PFKFB4	-0.405348	0.0385307
Q92485	SMPDL3B	-0.274328	0.0388053
Q7Z3I7	ZNF572	-0.169514	0.038891
Q06787	FMR1	-0.44304	0.0389256
O75121	MFAP3L	0.41158	0.0403173
P16860	NPPB	0.226024	0.0412741
P20718	GZMH	-0.252424	0.0414903
A6NCM1	IQCA1L	-0.321123	0.0419754
Q96LB3	IFT74	-0.315631	0.0421571
O43557	TNFSF14	-0.330353	0.0422681
Q15165	PON2	-0.144882	0.0422686
Q06945	SOX4	0.143289	0.042381
Q5SQQ9	VAX1	0.341828	0.0423837
Q96NZ8	WFIKKN1	-0.187769	0.0424076
Q2TAA8	TSNAXIP1	-0.402845	0.0435654
P49798	RGS4	-0.436991	0.043676
Q14184	DOC2B	-0.433806	0.0437192
A6NE01	FAM186A	0.353406	0.0437433
Q24JP5	TMEM132A	0.340451	0.0442576
P08962	CD63	-0.311863	0.0444693
P51687	SUOX	-0.247815	0.0449231
H3BUK9	POTEB2	0.348182	0.0449639
O95831	AIFM1	-0.333139	0.0451366
P06681	C2	-0.295472	0.0455433
O75326	SEMA7A	-0.222249	0.045964
P80098	CCL7	-0.25006	0.04631
Q7Z4W1	DCXR	-0.305512	0.0463405
4	RAET1L	0.241362	0.0470282
P60201	PLP1	-0.345643	0.0479816
P43234	CTSO	-0.236139	0.0479983
Q7Z5L2	R3HCC1L	-0.323806	0.0481747
P08603	CFH	-0.33814	0.0482215
Q6ZVC0	NYAP1	-0.355041	0.0485249
Q6MZT1	RGS7BP	0.234102	0.0487548
Q7Z6M3	MILR1	0.253806	0.0493198
P10645	CHGA	0.301937	0.0493559
P31040	SDHA	-0.423002	0.0496023
Q8TBB5	KLHDC4	-0.260604	0.0496664
Q9UKJ0	PILRB	-0.209553	0.0498291
Q6P4F7	ARHGAP11A	-0.170878	0.0498913
Q9UKI9	POU2F3	0.389696	0.0500331
Q99727	TIMP4	0.145986	0.0502265
Q8IYJ3	SYTL1	0.417363	0.0503484
Q86T75	NBPF11	-0.393594	0.0503539
P05543	SERPINA7	-0.167318	0.0503548
P50583	NUDT2	0.361231	0.0508351
Q18PE1	DOK7	-0.246376	0.0509834
Q155Q3	DIXDC1	-0.378349	0.0511298
Q6ZMT9	DTHD1	-0.293335	0.0513742
Q53LP3	SOWAHC	-0.263696	0.0515375
Q13409	DYNC1I2	-0.297116	0.0517952
Q86SJ6	DSG4	-0.133096	0.0524719
Q5JPI9	EEF1AKMT2	-0.317338	0.0530276
O43291	SPINT2	0.4109	0.053376
P00797	REN	-0.205969	0.0535201
Q49AJ0	FAM135B	0.145007	0.0535336
1	RIMBP3C	-0.329103	0.0536472
A6NMK8	INSYN2B	-0.246886	0.0538114
P56975	NRG3	0.179801	0.0540788
P05362	ICAM1	-0.212909	0.0544307
Q9NPG4	PCDH12	0.279928	0.0549207
7	FCGR3B	-0.148149	0.0549566
Q86XI6	PPP1R3B	-0.201521	0.0549612
Q8NI17	IL31RA	0.362293	0.0559403
Q96FQ6	S100A16	0.25084	0.0559741
Q5VY43	PEAR1	0.242176	0.0559924
Q8IZC4	RTKN2	-0.400726	0.0560074
Q9NZH8	IL36G	-0.183718	0.056151
Q13206	DDX10	-0.256794	0.0561796
O15063	GARRE1	-0.256548	0.0563458
Q9BZW7	TSGA10	-0.391535	0.0567412
Q9H892	TTC12	-0.371108	0.0568715
Q86Z20	CCDC125	-0.242881	0.0570131
Q9BSG5	RTBDN	0.307643	0.0573902
Q9BVL4	SELENOO	-0.22521	0.0574516
Q9NTM9	CUTC	-0.266779	0.0576807
Q6UXB8	PI16	-0.315655	0.0579299
Q6ZMM2	ADAMTSL5	0.339675	0.0582277
P61923	COPZ1	-0.336207	0.0586356
Q9BYZ8	REG4	0.211249	0.0587371
P30307	CDC25C	-0.40481	0.0596654
O95843	GUCA1C	-0.264834	0.0596748
Q9UKX7	NUP50	0.378569	0.0610039
O95897	OLFM2	-0.240809	0.0614135
P45379	TNNT2	-0.393626	0.0615177
P09683	SCT	0.257921	0.0618366
P15509	CSF2RA	-0.0895494	0.062091
Q76LX8	ADAMTS13	-0.255514	0.0621854
P61218	POLR2F	-0.304178	0.062325
Q5U5R9	HECTD2	0.345549	0.0623927
Q09MP3	RAD51AP2	-0.339464	0.0624976
Q8N9X3	LINC01356	-0.155034	0.0625062
P48594	SERPINB4	-0.282562	0.0625409
Q86X45	DNAAF11	0.311754	0.0625603
Q9H2G2	SLK	-0.30259	0.0626906
Q96NY9	MUS81	0.374557	0.0628799
Q5VYK3	ECPAS	-0.301989	0.0629137
P50135	HNMT	-0.263041	0.0631421
Q9UBN7	HDAC6	-0.382539	0.0637073
Q6ZVX7	NCCRP1	-0.229176	0.0641553
Q03426	MVK	-0.257533	0.0645265
Q9UKF6	CPSF3	-0.339949	0.0650967
Q96JA1	LRIG1	-0.256956	0.0651465
P05305	EDN1	0.293926	0.065716
Q5T7B8	KIF24	-0.298969	0.0662311
Q9NY57	STK32B	0.372084	0.0664251
Q96T92	INSM2	0.394	0.0665194
P01178	OXT	-0.100929	0.0666802
Q49AH0	CDNF	0.346216	0.0673563
Q6ZMW3	EML6	-0.281682	0.0673582
P54277	PMS1	-0.340555	0.0678801
P13647	KRT5	-0.329744	0.067896
Q9BUQ8	DDX23	0.366021	0.0680425
O71037	ERVK-19	-0.173541	0.0689675
Q8NEB7	ACRBP	-0.288137	0.0691406
P05231	IL6	-0.258292	0.0692736
P15144	ANPEP	-0.305504	0.0692974
Q13241	KLRD1	-0.177224	0.0693274
Q9BZE7	C22orf23	-0.377852	0.0693683
P27487	DPP4	-0.188163	0.069541
P43146	DCC	0.305849	0.0696982
2	YB057	-0.19607	0.0699951
Q96AX9	MIB2	0.187184	0.0701693
Q9BW19	KIFC1	-0.305712	0.0701777
A6NFE3	EFCAB10	-0.289504	0.0702031
P05107	ITGB2	-0.173698	0.0702741
P20645	M6PR	-0.165878	0.0707553
P41159	LEP	-0.174258	0.0709269
Q13191	CBLB	0.320203	0.0713082
O15455	TLR3	-0.137568	0.0721376
Q8IXH6	TP53INP2	0.32555	0.0723407
Q96LD4	TRIM47	-0.295671	0.0724845
A2VDJ0	TMEM131L	-0.394554	0.0726287
P52758	RIDA	-0.272524	0.0728775
P54132	BLM	0.399341	0.0732553
P46952	HAAO	-0.2681	0.0733994
Q9UJ70	NAGK	-0.320508	0.0734653
A6NC98	CCDC88B	-0.343651	0.0735409
P18065	IGFBP2	0.178102	0.0741025
Q8N1F8	STK11IP	-0.34382	0.0746
Q1MSJ5	CSPP1	-0.303789	0.0746649
Q71F56	MED13L	-0.336296	0.0748956
Q9BRQ6	CHCHD6	-0.288718	0.0750689
Q9NYF0	DACT1	0.312963	0.0751514
P60022	DEFB1	0.185705	0.075494
Q96S90	LYSMD1	-0.322193	0.0757869
O76070	SNCG	-0.149243	0.0759053
A8MVZ5	BTNL10P	-0.295469	0.075953
P57729	RAB38	-0.282492	0.0762093
Q6UX06	OLFM4	-0.133526	0.0762104
Q2M3G4	SHROOM1	-0.393639	0.0762283
A8MTB9	CEACAM18	0.392567	0.0764948
Q5QGZ9	CLEC12A	-0.245986	0.0767486
Q8IYW5	RNF168	0.30285	0.0770205
Q9BY66	KDM5D	-0.351154	0.0770939
Q8IYY4	DZIP1L	-0.322477	0.0772256
Q07075	ENPEP	-0.306506	0.0775805
Q96TA1	NIBAN2	0.324161	0.0776838
O43491	EPB41L2	-0.349932	0.0776957
Q5THK1	PRR14L	-0.25995	0.0777898
P60763	RAC3	-0.223275	0.0778893
Q9GZP4	PITHD1	0.361498	0.0779436
P36222	CHI3L1	0.126187	0.0781238
Q8N5S9	CAMKK1	-0.296343	0.0783326
P55058	PLTP	0.228716	0.0783473
Q12918	KLRB1	-0.193028	0.0783896
Q12884	FAP	0.262976	0.0784031
Q12894	IFRD2	-0.277991	0.0785951
O75891	ALDH1L1	-0.244765	0.0787725
Q5VUJ9	EFCAB2	-0.39204	0.079369
O95997	PTTG1	0.365697	0.0794303
Q8IZ41	RASEF	-0.327305	0.0794998
Q8WV28	BLNK	-0.288915	0.0795025
Q9BPZ7	MAPKAP1	0.304049	0.079583
Q8IV36	HID1	0.272634	0.0796595
P08833	IGFBP1	-0.166102	0.0797488
Q99969	RARRES2	-0.298825	0.0797747
Q9UM54	MYO6	-0.367444	0.080161
Q96MK3	FAM20A	-0.211185	0.0811652
Q6NUS6	TCTN3	-0.21747	0.0813034
P61129	ZC3H6	-0.185223	0.0817021
P07333	CSF1R	-0.181488	0.0821438
Q6UYE1	DLEU7	-0.257133	0.0822332
Q15109	AGER	0.182356	0.0822819
Q13203	MYBPH	0.28295	0.0823473
P69892	HBG2	0.33465	0.0824144
Q96IV0	NGLY1	-0.229989	0.0827551
Q8IUH2	CREG2	-0.313119	0.0828169
E9PIF3	NPIPA2	-0.281944	0.0831468
Q2KHM9	KIAA0753	0.30363	0.0833721
P22001	KCNA3	0.33377	0.0834387
P07359	GP1BA	0.262866	0.083455
Q8N4E4	PDCL2	0.249533	0.0841421
Q01974	ROR2	-0.375322	0.0844407
Q14515	SPARCL1	0.242831	0.0849482
P46013	MKI67	-0.371268	0.0851327
Q15043	SLC39A14	-0.270889	0.0853571
Q9Y285	FARSA	-0.353184	0.0853723
P21589	NT5E	-0.24704	0.0855271
O94979	SEC31A	-0.322902	0.0858909
Q9Y303	AMDHD2	0.346763	0.0859854
Q9NYX4	CALY	-0.361966	0.0860259
Q9UH65	SWAP70	-0.322168	0.0863
P20851	C4BPB	-0.347396	0.0864077
O95498	VNN2	-0.129341	0.0864767
P00751	CFB	-0.270687	0.0865577
P20023	CR2	-0.147109	0.0877519
O60716	CTNND1	-0.229564	0.0878479
Q96M83	CCDC7	-0.252137	0.0881307
P10092	CALCB	-0.277268	0.0883689
Q8IVL1	NAV2	-0.332371	0.0884782
Q6P2D8	XRRA1	0.366462	0.0888319
Q14994	NR1I3	0.377684	0.0889699
P35590	TIE1	-0.151161	0.0892296
Q16720	ATP2B3	-0.207521	0.0894216
Q9NSC5	HOMER3	-0.166969	0.0896992
Q96GY0	ZC2HC1A	-0.200399	0.0897309
P09211	GSTP1	-0.302842	0.0900267
O95858	TSPAN15	-0.184414	0.0903202
Q9NR71	ASAH2	-0.165416	0.0905372
P0C024	NUDT7	-0.332789	0.0905981
P58499	FAM3B	0.170038	0.0908247
Q14624	ITIH4	-0.295653	0.0912437
P59780	AP3S2	-0.36397	0.0913807
P68543	UBXN2A	-0.316334	0.0915494
Q9BY15	ADGRE3	-0.190677	0.09158
P22079	LPO	-0.190115	0.0916109
Q16656	NRF1	-0.321973	0.0919281
P50995	ANXA11	-0.317022	0.0920989
Q9NSV4	DIAPH3	-0.367359	0.092198
P09417	QDPR	-0.338158	0.092447
P20702	ITGAX	-0.329274	0.0927059
Q9Y6V7	DDX49	-0.231272	0.0930251
P49888	SULT1E1	-0.336062	0.0930461
Q8N5R6	CCDC33	0.248735	0.0930581
Q9NV79	PCMTD2	0.334225	0.0933441
P47813	EIF1AX	-0.371295	0.0939379
Q2M3V2	SOWAHA	0.360829	0.094024
O60476	MAN1A2	-0.288489	0.0944476
Q5T6F2	UBAP2	-0.236301	0.0945404
Q9UGI8	TES	0.150876	0.0946281
4	DEFB4A	-0.189851	0.0947043
O14791	APOL1	-0.338203	0.0947449
P39900	MMP12	-0.145889	0.0949339
Q6ZMN7	PDZRN4	-0.323582	0.0950912
P21695	GPD1	-0.189692	0.0951986
P55789	GFER	-0.306987	0.0952562
O43823	AKAP8	0.156781	0.0953515
Q16878	CDO1	-0.350588	0.0953566
A8MYZ0	MINDY4B	0.34398	0.0953615
P20382	PMCH	-0.177529	0.0954277
Q96P66	GPR101	0.264611	0.0955285
Q8WVQ1	CANT1	-0.313354	0.0957891
O43776	NARS1	-0.337247	0.095823
A8MTL3	RNF212B	-0.24846	0.0958235
P14625	HSP90B1	-0.26367	0.0959015
Q92783	STAM	0.314128	0.0961916
Q9C0K0	BCL11B	-0.225497	0.0962514
Q96M02	C10orf90	-0.173168	0.0962869
Q6V0L0	CYP26C1	0.349992	0.0964607
Q8WXG8	S100Z	0.317956	0.0966128
A6NN73	GOLGA8CP	0.359419	0.0973392
Q15388	TOMM20	-0.302646	0.0982978
O43707	ACTN4	0.320772	0.0985373
Q96MN5	TCEANC2	0.334747	0.0988652
P12955	PEPD	0.269327	0.0988961
Q9C0D0	PHACTR1	-0.334838	0.0989666
A6NI28	ARHGAP42	0.367645	0.0990346
Q96IY4	CPB2	-0.276888	0.0990473
Q96GP6	SCARF2	0.285348	0.0995047
P18754	RCC1	-0.327759	0.0996414
P61371	ISL1	0.353132	0.0997977
Q9BYP7	WNK3	-0.231296	0.0998774
Q8TD46	CD200R1	-0.153765	0.100308
Q9UBR1	UPB1	-0.236954	0.101596
P50591	TNFSF10	-0.269868	0.101637
Q9NZQ0	DNAJC27	-0.315139	0.102036
O75629	CREG1	-0.128988	0.102523
P06276	BCHE	-0.172069	0.102595
Q99469	STAC	-0.269757	0.102611
Q8N7X0	ADGB	-0.34101	0.102671
Q86VG3	IFTAP	0.219254	0.102787
P04808	RLN1	-0.169103	0.102846
P20700	LMNB1	0.300802	0.10294
Q99972	MYOC	0.221501	0.102989
P48436	SOX9	-0.318644	0.10317
Q6ZVF9	GPRIN3	-0.188697	0.10336
O75600	GCAT	0.250997	0.103517
Q8NCU1	CCDC197	-0.331249	0.104158
Q14914	PTGR1	-0.195084	0.10423
Q01826	SATB1	-0.23717	0.104315
P29460	IL12B	0.197544	0.104552
P12277	CKB	0.159302	0.104724
O95760	IL33	-0.232763	0.104808
Q6TDU7	DNAI7	0.268933	0.104992
Q969Y2	GTPBP3	0.31435	0.105
P23634	ATP2B4	0.293816	0.10534
Q9ULW2	FZD10	-0.196803	0.105552
Q9UQV4	LAMP3	-0.179353	0.105629
Q9P2J2	IGSF9	-0.122503	0.105706
P22492	H1-6	-0.127961	0.10616
Q9UBC9	SPRR3	-0.289391	0.10622
Q6NUQ1	RINT1	-0.235156	0.106948
P35398	RORA	-0.312536	0.107213
P42892	ECE1	-0.289954	0.107294
O15226	NKRF	0.315948	0.107329
P22466	GAL	0.230565	0.10734
Q5W0B1	OBI1	-0.28448	0.107413
Q9NP61	ARFGAP3	0.290221	0.107598
Q8IVF2	AHNAK2	-0.154444	0.107625
Q9NPF5	DMAP1	0.352189	0.107659
P42768	WAS	-0.313011	0.108377
P12004	PCNA	-0.295888	0.108394
Q8TAL5	C9orf43	-0.202364	0.108403
P42658	DPP6	-0.214914	0.108828
O94856	NFASC	-0.144429	0.109135
P49761	CLK3	-0.0862252	0.109278
P12104	FABP2	0.207179	0.109576
P43378	PTPN9	0.281604	0.109648
Q9H114	CSTL1	-0.133675	0.110112
Q96CM4	NXNL1	-0.343427	0.11051
P33764	S100A3	-0.297452	0.110729
Q12860	CNTN1	-0.170356	0.110824
Q53GQ0	HSD17B12	-0.288809	0.111064
P13236	CCL4	-0.163471	0.111431
P78539	SRPX	0.196608	0.111509
Q8IYS2	KIAA2013	0.214219	0.111685
Q10469	MGAT2	-0.259267	0.111896
Q93045	STMN2	-0.341069	0.112029
Q9UI15	TAGLN3	-0.271883	0.112129
P0C0L5	C4B	-0.148208	0.11218
Q9BXU0	TEX12	0.309104	0.112575
P22004	BMP6	-0.101643	0.112685
Q14641	INSL4	0.174388	0.113026
P16442	ABO	0.0748925	0.113205
O43903	GAS2	-0.336755	0.113276
Q5RHP9	ERICH3	-0.151564	0.113296
O95180	CACNA1H	0.244445	0.113503
P49755	TMED10	0.288326	0.113507
P34896	SHMT1	-0.232491	0.113989
P07998	RNASE1	0.205396	0.114048
Q9NQI0	DDX4	-0.325857	0.114109
Q9NQR4	NIT2	-0.293632	0.114272
Q96BJ3	AIDA	0.265988	0.114388
O75051	PLXNA2	0.155677	0.114592
Q8N7U9	LINC00469	0.328786	0.114631
P27695	APEX1	-0.246011	0.114969
Q8IYB0	YK038	0.31251	0.115014
Q99549	MPHOSPH8	-0.30809	0.11535
P02763	ORM1	-0.247333	0.115372
Q68DU8	KCTD16	-0.170084	0.115669
Q9NRW1	RAB6B	-0.180005	0.115794
O43665	RGS10	-0.315311	0.1161
Q96JH8	RADIL	-0.205102	0.11612
Q86W67	FAM228A	-0.243431	0.116153
Q6UXH9	PAMR1	-0.200961	0.116181
P78410	BTN3A2	-0.171678	0.11622
O95256	IL18RAP	-0.0624817	0.116367
Q5H9U9	DDX60L	-0.25232	0.116455
O75330	HMMR	0.271429	0.116634
Q9ULM0	PLEKHH1	-0.286939	0.117279
Q8N7E2	CBLL2	0.243854	0.117715
P78324	SIRPA	-0.159269	0.118609
P00749	PLAU	0.194973	0.118651
Q99717	SMAD5	-0.259824	0.119115
P43358	MAGEA4	-0.24986	0.119139
O76095	JTB	0.269935	0.119177
Q06643	LTB	-0.150596	0.119429
Q96FW1	OTUB1	-0.230684	0.119497
O60469	DSCAM	-0.272949	0.119843
Q15399	TLR1	-0.155273	0.120525
Q15014	MORF4L2	-0.316352	0.120756
Q96CN9	GCC1	-0.310638	0.121075
Q9P243	ZFAT	0.230832	0.121135
Q15642	TRIP10	0.2281	0.121772
Q8WUW1	BRK1	0.240874	0.121852
Q99523	SORT1	0.214421	0.122206
Q9H422	HIPK3	-0.161119	0.12221
Q8WY91	THAP4	-0.241692	0.122263
Q9Y365	STARD10	-0.234958	0.122421
Q9NW64	RBM22	-0.320758	0.122698
Q9NZQ7	CD274	-0.253707	0.122959
O95125	ZNF202	-0.285614	0.123002
Q9BTT0	ANP32E	-0.285747	0.123087
P54105	CLNS1A	0.270438	0.123197
4	DEFB103A	-0.122233	0.123202
P32455	GBP1	-0.266923	0.123291
Q9NRA8	EIF4ENIF1	-0.236241	0.123353
Q8IYV9	IZUMO1	0.320879	0.123475
O75355	ENTPD3	-0.275287	0.123535
P13284	IFI30	-0.251534	0.123736
P04217	A1BG	-0.24416	0.124208
Q96SD1	DCLRE1C	0.21495	0.124438
Q9UL40	ZNF346	0.285086	0.124446
Q9Y2Y8	PRG3	-0.192164	0.12457
O15389	SIGLEC5	-0.14157	0.124756
Q13323	BIK	0.310692	0.12526
P98164	LRP2	0.192074	0.125328
Q9BUP0	EFHD1	0.208046	0.125451
Q9NZG7	NINJ2	-0.299853	0.12578
Q9H5V8	CDCP1	-0.131288	0.125845
O75718	CRTAP	-0.272726	0.126041
Q8N612	FHIP1B	-0.234937	0.126143
P48740	MASP1	-0.291295	0.126272
P40424	PBX1	0.246821	0.126352
Q9H9F9	ACTR5	-0.25618	0.126373
Q9Y4F5	CEP170B	-0.152737	0.126434
Q9P289	STK26	-0.31074	0.126701
Q9Y5Z7	HCFC2	-0.224589	0.126815
Q6ISS4	LAIR2	-0.0521747	0.126975
Q6UWR7	ENPP6	-0.268701	0.127022
P06858	LPL	0.200579	0.127027
P55273	CDKN2D	-0.270628	0.127196
Q86UW9	DTX2	-0.164097	0.127285
Q8IVF4	DNAH10	-0.277663	0.127302
Q9Y2Y0	ARL2BP	-0.276705	0.127538
Q8IV63	VRK3	0.07518	0.12755
P11310	ACADM	0.138634	0.127585
O75525	KHDRBS3	-0.174936	0.127768
Q15785	TOMM34	-0.259496	0.127877
Q9P1Q0	VPS54	-0.285137	0.128029
Q86UB2	BIVM	-0.266511	0.128097
P0DMB1	PRR23D2	-0.278969	0.128375
Q6UXH8	CCBE1	0.179598	0.128543
O60678	PRMT3	-0.297186	0.128549
O43422	THAP12	0.133736	0.128577
P48165	GJA8	0.278255	0.128695
Q9HAV5	EDA2R	0.153644	0.129204
P14384	CPM	-0.17155	0.129883
Q9Y6N9	USH1C	0.184209	0.129985
P50897	PPT1	-0.166608	0.130111
P61266	STX1B	-0.272856	0.130133
Q86Y22	COL23A1	-0.300911	0.130393
O94929	ABLIM3	-0.206367	0.130555
Q9P2R7	SUCLA2	0.244829	0.130708
O14879	IFIT3	-0.265981	0.130762
O75365	PTP4A3	-0.21911	0.130796
Q9BQP9	BPIFA3	-0.256308	0.131077
Q96S15	WDR24	0.260345	0.131182
NT-proBNP	NT-proBNP	0.147952	0.131621
Q9NXV2	KCTD5	-0.225595	0.131664
Q9Y4D1	DAAM1	-0.28809	0.131897
Q9BZZ2	SIGLEC1	-0.192969	0.132272
P24588	AKAP5	-0.310179	0.132573
O00451	GFRA2	-0.224106	0.132695
Q9UM19	HPCAL4	0.242082	0.132977
P51580	TPMT	-0.226852	0.133168
O43866	CD5L	-0.156539	0.133658
Q9H7Z7	PTGES2	-0.319759	0.133696
O43505	B4GAT1	-0.206883	0.133774
P19883	FST	-0.272332	0.134445
Q6P1R4	DUS1L	-0.287489	0.134571
Q5CZC0	FSIP2	-0.333642	0.134841
P01584	IL1B	-0.328375	0.134886
Q04900	CD164	-0.250238	0.135025
Q5T1N1	AKNAD1	-0.133006	0.135033
Q4G0X9	CCDC40	-0.283892	0.135035
Q01954	BNC1	-0.284048	0.135137
P13521	SCG2	0.212778	0.135166
Q13426	XRCC4	-0.266913	0.135174
P09919	CSF3	-0.184593	0.135464
Q96NB1	CEP20	0.266018	0.135615
Q9UNY4	TTF2	-0.310543	0.136159
P08294	SOD3	0.19709	0.136163
O15496	PLA2G10	0.193039	0.136171
Q5VWK5	IL23R	-0.185102	0.136246
O60218	AKR1B10	-0.301874	0.136517
Q9HCS5	EPB41L4A	-0.221234	0.136611
O14960	LECT2	-0.128822	0.136935
O95866	MPIG6B	-0.286021	0.137111
Q9P1V8	SAMD15	-0.326357	0.137165
P02652	APOA2	0.326616	0.137202
Q9BXF6	RAB11FIP5	0.145695	0.137477
Q06830	PRDX1	-0.312858	0.137537
Q6PI73	LILRA6	-0.124302	0.137682
Q8IZH2	XRN1	-0.322924	0.137744
Q9BU40	CHRDL1	0.22584	0.137932
Q8TAD2	IL17D	0.170888	0.138249
A6NMZ7	COL6A6	-0.282479	0.138356
O60749	SNX2	-0.28305	0.138394
P08172	CHRM2	0.172161	0.138421
Q96Q07	BTBD9	-0.251427	0.13866
P09668	CTSH	-0.0853352	0.138941
Q6ZRN7	YP029	0.28424	0.139791
P00736	C1R	-0.305353	0.139844
Q13114	TRAF3	0.298351	0.13991
Q13895	BYSL	-0.189189	0.140018
Q9UKV3	ACIN1	-0.260902	0.140026
Q96GW7	BCAN	-0.192536	0.140186
Q9P0M4	IL17C	-0.185009	0.140475
Q9Y6X0	SETBP1	-0.0921733	0.140511
Q7Z739	YTHDF3	-0.262308	0.140606
Q9BSU3	NAA11	-0.189815	0.140689
O43432	EIF4G3	-0.289919	0.140729
P28325	CST5	0.0811834	0.140755
O94779	CNTN5	-0.13498	0.141355
Q92543	SNX19	-0.282845	0.141404
P62834	RAP1A	-0.22191	0.141415
Q9Y237	PIN4	0.128769	0.141541
Q8IX12	CCAR1	-0.190545	0.141689
Q7Z7K0	CMC1	-0.280273	0.141781
Q9BZJ3	TPSD1	0.165695	0.142032
P13725	OSM	-0.20845	0.142445
Q86Y26	NUTM1	0.30537	0.142783
Q687X5	STEAP4	-0.153814	0.142829
O00622	CCN1	-0.195338	0.142972
P53539	FOSB	-0.313981	0.143092
O60243	HS6ST1	-0.248899	0.143373
Q8NF99	ZNF397	-0.296063	0.143974
P29536	LMOD1	0.208926	0.143992
Q96B01	RAD51AP1	-0.299895	0.144034
P07196	NEFL	0.232795	0.144736
Q8N568	DCLK2	0.143356	0.145229
P35443	THBS4	0.240933	0.145616
P35638	DDIT3	-0.293655	0.145687
4	KIR2DL2	-0.0947345	0.145933
Q96L91	EP400	-0.297553	0.146215
Q7Z569	BRAP	-0.284496	0.146505
Q9Y5K2	KLK4	0.0879409	0.146517
Q9HC78	ZBTB20	0.228832	0.146648
O94760	DDAH1	-0.267407	0.147633
P35637	FUS	-0.29463	0.147666
Q8TC71	SPATA18	-0.22246	0.14772
P36969	GPX4	-0.192037	0.148426
Q9Y546	LRRC42	-0.206692	0.148783
P05549	TFAP2A	0.197236	0.148858
Q9H160	ING2	-0.295206	0.148939
Q9H477	RBKS	-0.248983	0.149202
Q8N954	GPATCH11	0.215317	0.149254
Q8WWN9	IPCEF1	-0.273931	0.149491
Q9BV20	MRI1	-0.306203	0.149611
Q9H3S3	TMPRSS5	-0.0906049	0.150068
P04066	FUCA1	-0.0697754	0.150377
Q96S94	CCNL2	0.16697	0.150444
Q02747	GUCA2A	0.164513	0.150594
P05546	SERPIND1	-0.216002	0.150694
Q9NWM8	FKBP14	-0.299761	0.150844
Q92823	NRCAM	-0.274262	0.151019
Q9UBP4	DKK3	0.209034	0.151029
Q6PI77	GPRASP3	-0.245569	0.151046
P20827	EFNA1	-0.234271	0.151222
O14967	CLGN	-0.200932	0.151444
1	HSFX1	-0.24071	0.151877
Q9H293	IL25	0.299868	0.152023
Q9Y3C0	WASHC3	-0.268646	0.152055
Q9HBB8	CDHR5	-0.209088	0.152066
Q9NR48	ASH1L	0.260692	0.152257
Q5XUX0	FBXO31	0.250555	0.152267
Q9Y320	TMX2	-0.153521	0.152422
P20138	CD33	-0.0699451	0.152483
Q6UXK2	ISLR2	0.135551	0.152863
Q9H4A9	DPEP2	-0.212748	0.153079
A8K0R7	ZNF839	-0.152336	0.153155
P43251	BTD	-0.169678	0.153171
O43240	KLK10	0.166827	0.15333
Q8N6C8	LILRA3	-0.196735	0.153481
Q9NQ48	LZTFL1	-0.261438	0.153494
Q9NU19	TBC1D22B	-0.217193	0.153554
Q9UIF9	BAZ2A	-0.240381	0.15364
P05121	SERPINE1	-0.194635	0.153688
Q969T7	NT5C3B	0.282501	0.154009
Q86TS9	MRPL52	-0.237393	0.154153
Q16625	OCLN	-0.206227	0.15423
Q13316	DMP1	0.19344	0.154344
Q496F6	CD300E	-0.202299	0.154538
Q49MG5	MAP9	-0.203113	0.154641
Q495T6	MMEL1	0.220197	0.154786
Q15911	ZFHX3	0.301	0.154842
O15213	WDR46	0.286863	0.154958
Q9NUW8	TDP1	-0.268157	0.15527
Q13439	GOLGA4	-0.267903	0.155729
O15078	CEP290	-0.291809	0.156039
P05060	CHGB	0.201548	0.156213
P04626	ERBB2	-0.200126	0.156511
P15531	NME1	0.313825	0.156563
Q8TF30	WHAMM	-0.265654	0.156663
Q9NZC7	WWOX	-0.152017	0.156775
P35226	BMI1	0.288192	0.15718
Q68D86	CCDC102B	0.148052	0.157194
P13861	PRKAR2A	-0.26999	0.157433
Q9BRT2	UQCC2	-0.30646	0.157446
P16422	EPCAM	0.142785	0.157633
Q9NRG9	AAAS	0.214285	0.157933
Q13601	KRR1	-0.241904	0.158249
P12544	GZMA	-0.202365	0.158278
P28907	CD38	-0.192988	0.158294
Q5T2Q4	CCNYL2	-0.165894	0.158915
Q9H6S1	AZI2	-0.272671	0.159157
Q13127	REST	0.219488	0.159335
Q96BY6	DOCK10	0.283011	0.159699
Q02539	H1-1	-0.111539	0.159892
Q8NFP9	NBEA	-0.1933	0.159985
O95445	APOM	-0.244633	0.160186
P05160	F13B	-0.215181	0.160257
Q9NQC7	CYLD	-0.231601	0.160343
Q6ZW13	C16orf86	-0.281445	0.160615
Q9HD36	BCL2L10	0.264027	0.160716
P08727	KRT19	0.150125	0.161372
O95696	BRD1	-0.291461	0.161504
P49862	KLK7	-0.210513	0.161622
Q07021	C1QBP	-0.178132	0.161655
P05976	MYL1	0.299498	0.162008
P62072	TIMM10	0.281329	0.162283
Q15291	RBBP5	-0.254506	0.162556
Q8TBZ3	WDR20	-0.293824	0.162775
Q9HCU4	CELSR2	0.214449	0.162785
Q86TB3	ALPK2	0.232619	0.162978
O60260	PRKN	-0.252248	0.163702
O15182	CETN3	-0.211558	0.163809
Q9NQ35	NRIP3	0.269345	0.164176
Q5T1M5	FKBP15	0.235913	0.164189
Q9BZA5	TXLNGY	-0.25649	0.16427
P35542	SAA4	-0.207241	0.164408
O43827	ANGPTL7	-0.0999657	0.164763
Q8IVS2	MCAT	-0.23913	0.164852
O75901	RASSF9	0.296609	0.165084
Q9H8L6	MMRN2	0.227938	0.165345
P30084	ECHS1	-0.191388	0.165443
Q15116	PDCD1	-0.159634	0.165963
Q9UJY4	GGA2	0.292342	0.166069
Q05329	GAD2	0.193985	0.166349
Q8N2Q7	NLGN1	0.300918	0.166932
Q9UN42	ATP1B4	-0.231231	0.167007
Q8IY22	CMIP	-0.279928	0.168547
Q9HBL6	LRTM1	0.271324	0.168916
B6A8C7	TARM1	0.218991	0.16934
O00194	RAB27B	-0.274352	0.169928
Q9NPH0	ACP6	-0.115183	0.17002
Q96M11	HYLS1	-0.19919	0.17039
P13995	MTHFD2	-0.266704	0.170847
Q8NC42	RNF149	-0.177685	0.171183
Q13489	BIRC3	-0.272034	0.171204
Q96CG8	CTHRC1	-0.158471	0.17125
Q9UKX3	MYH13	-0.264473	0.171511
Q08379	GOLGA2	-0.30521	0.171689
A4UGR9	XIRP2	0.188766	0.17176
Q6P0Q8	MAST2	0.204661	0.171813
Q4L235	AASDH	-0.261771	0.171822
Q02447	SP3	0.297426	0.172009
O43521	BCL2L11	-0.140678	0.172059
Q9H201	EPN3	-0.0882311	0.17221
P33241	LSP1	-0.199905	0.172391
Q6UXD5	SEZ6L2	-0.206967	0.172597
Q86T82	USP37	0.210822	0.172694
Q9BZV1	UBXN6	-0.228417	0.172736
P48668	KRT6C	-0.205261	0.172785
O60575	SPINK4	0.121738	0.172961
Q96SB3	PPP1R9B	-0.261744	0.173177
Q8WWF6	DNAJB3	-0.286324	0.173633
Q6NUJ1	PSAPL1	0.12228	0.17402
P05090	APOD	0.233661	0.174148
Q9H3G5	CPVL	-0.115832	0.1743
Q9H093	NUAK2	-0.213151	0.174446
Q9H4F8	SMOC1	-0.201322	0.174463
Q8IVG5	SAMD9L	-0.254545	0.174592
Q9NXA8	SIRT5	-0.138423	0.174934
Q92805	GOLGA1	-0.270076	0.175348
Q96PL1	SCGB3A2	0.127917	0.175748
O15031	PLXNB2	-0.210283	0.175925
Q0IIN9	ZNF252P-AS1	-0.20498	0.17596
Q7Z304	MAMDC2	0.167771	0.175972
Q9UJM3	ERRFI1	0.256557	0.176127
Q58FF6	HSP90AB4P	0.285516	0.176174
P35548	MSX2	-0.154824	0.176181
Q86SR1	GALNT10	-0.156682	0.17628
P05155	SERPING1	-0.220037	0.176379
Q9Y375	NDUFAF1	0.292043	0.176633
P04275	VWF	0.21477	0.176965
P29350	PTPN6	-0.26822	0.177312
Q9Y6U3	SCIN	0.1665	0.177783
A8K554	ZNF815P	0.256876	0.177839
Q8WWQ8	STAB2	-0.191778	0.177852
Q96NB3	ZNF830	0.254747	0.177869
Q569K4	ZNF385B	-0.137861	0.177961
O94868	FCHSD2	-0.252989	0.178146
Q07960	ARHGAP1	-0.293366	0.178164
A5PL33	KRBA1	-0.239775	0.178297
A6NDB9	PALM3	-0.159947	0.17871
P48169	GABRA4	-0.23183	0.178735
O14639	ABLIM1	-0.230478	0.179254
O60341	KDM1A	-0.247561	0.179401
O75379	VAMP4	0.225092	0.180109
Q8N5Q1	GARIN5B	-0.128624	0.180284
Q8IYA2	CCDC144CP	-0.260977	0.180567
P30047	GCHFR	-0.180148	0.180642
P85299	PRR5	0.214677	0.180941
Q96C86	DCPS	-0.247478	0.181101
Q8TE58	ADAMTS15	0.2036	0.181398
Q8IU60	DCP2	-0.260934	0.181457
Q13029	PRDM2	-0.215499	0.182541
Q149N8	SHPRH	0.277763	0.182688
Q9Y2L6	FRMD4B	-0.272975	0.182821
Q9NYF5	FAM13B	-0.242375	0.183006
Q9NRG1	PRTFDC1	-0.265167	0.183184
Q7Z6I8	C5orf24	-0.234476	0.183211
Q969R5	L3MBTL2	-0.180001	0.18333
Q99574	SERPINI1	-0.251974	0.183335
Q9Y6A4	CFAP20	0.284759	0.184194
Q96DX8	RTP4	-0.184736	0.184295
P18846	ATF1	-0.291823	0.184487
Q13308	PTK7	-0.186904	0.184523
Q9UI42	CPA4	-0.128228	0.184716
Q9HCH5	SYTL2	0.275301	0.184876
P06727	APOA4	0.258092	0.184909
Q14576	ELAVL3	-0.277795	0.184964
Q69YH5	CDCA2	-0.22801	0.185072
Q6UWW8	CES3	-0.158622	0.18525
P05187	ALPP	-0.0561055	0.185466
Q5T2W1	PDZK1	-0.194284	0.185517
P26232	CTNNA2	0.2423	0.185541
O75443	TECTA	-0.23223	0.185625
P21810	BGN	0.153954	0.186112
Q9UDT6	CLIP2	-0.263934	0.186372
Q9HD43	PTPRH	-0.118462	0.186514
Q8N183	NDUFAF2	-0.230615	0.186544
Q99731	CCL19	-0.133054	0.186798
Q8N8I0	SAMD12	-0.156088	0.187125
Q53EZ4	CEP55	-0.253127	0.187459
Q8IV76	PASD1	0.257686	0.18813
Q6UXM1	LRIG3	0.288477	0.188292
Q9ULG3	CFAP92	0.250913	0.188444
Q92529	SHC3	-0.176901	0.188583
Q8N386	LRRC25	-0.178393	0.188884
Q9UKP3	ITGB1BP2	-0.248618	0.189005
Q5SNV9	C1orf167	0.276911	0.18905
Q5VXU9	SHOC1	0.195569	0.189069
Q8IY37	DHX37	0.21965	0.189132
Q9Y6F8	CDY1	0.256012	0.189238
Q9NYV4	CDK12	-0.184237	0.189263
O14526	FCHO1	-0.244486	0.189348
Q96FT9	IFT43	-0.19203	0.189808
Q5VSY0	GKAP1	-0.217866	0.190039
P53384	NUBP1	0.22254	0.190311
Q9H2A7	CXCL16	-0.170399	0.190315
Q9BZR6	RTN4R	-0.148471	0.190437
P0DJD7	PGA4	0.126492	0.190891
Q86Y34	ADGRG3	-0.14293	0.191008
Q66GS9	CEP135	-0.253219	0.191663
P28223	HTR2A	0.244928	0.191778
Q00537	CDK17	-0.211448	0.19181
Q8N9T8	KRI1	0.202576	0.191857
Q96JM3	CHAMP1	0.274687	0.192391
Q8NDB2	BANK1	-0.251949	0.192434
O75182	SIN3B	-0.196803	0.192505
P02647	APOA1	0.28862	0.192537
Q9H347	UBQLN3	-0.258919	0.192727
Q5XKL5	BTBD8	0.224481	0.192809
Q8TCU4	ALMS1	0.221025	0.193108
Q86UE4	MTDH	-0.203458	0.193138
Q99942	RNF5	-0.23663	0.193146
P22304	IDS	-0.209502	0.193282
Q9UJ98	STAG3	-0.268033	0.193356
P04406	GAPDH	-0.236036	0.193644
P08684	CYP3A4	0.12582	0.19394
Q9BS31	ZNF649	-0.264242	0.194028
Q8WV92	MITD1	-0.259612	0.194289
Q9BVG8	KIFC3	-0.254903	0.194465
Q86WV1	SKAP1	-0.146515	0.194795
Q9UQE7	SMC3	-0.13556	0.194841
Q00653	NFKB2	-0.247223	0.194918
Q8IVL6	P3H3	-0.141232	0.195142
P42081	CD86	-0.139483	0.195176
Q9H1D9	POLR3F	0.214109	0.195609
P15382	KCNE1	-0.281594	0.195946
O75173	ADAMTS4	-0.229651	0.196053
Q6ZSG2	INSYN2A	-0.134195	0.19609
Q9NWM3	CUEDC1	-0.23814	0.19623
P21854	CD72	0.205645	0.196417
O95998	IL18BP	-0.190684	0.196562
P01730	CD4	-0.175651	0.19661
Q8NCN4	RNF169	-0.153206	0.196992
Q6L9W6	B4GALNT3	-0.216871	0.196999
Q03014	HHEX	-0.238217	0.197257
Q13043	STK4	-0.241297	0.197588
A6NFE2	SMCO2	-0.26865	0.197699
Q08AD1	CAMSAP2	-0.14068	0.197815
Q6ZUJ4	C3orf62	-0.206754	0.197818
Q03154	ACY1	-0.156465	0.197864
Q99759	MAP3K3	-0.188249	0.197886
P59901	LILRA4	-0.175115	0.197927
P30203	CD6	-0.120823	0.198465
Q15172	PPP2R5A	-0.258311	0.198547
Q58EX2	SDK2	-0.237089	0.198652
Q8N0X4	CLYBL	-0.24048	0.198668
P53367	ARFIP1	-0.276299	0.198761
Q5VST9	OBSCN	0.217836	0.198887
P16871	IL7R	0.141809	0.199303
P26010	ITGB7	-0.138791	0.199347
Q8TEW0	PARD3	-0.207272	0.199709
Q6WN34	CHRDL2	0.16415	0.199823
O95155	UBE4B	0.127457	0.199908
P13994	YJU2B	-0.110248	0.200015
Q9H1U4	MEGF9	-0.176122	0.200069
Q6XE24	RBMS3	-0.186548	0.200221
Q99547	MPHOSPH6	0.227498	0.20024
Q9NRV9	HEBP1	-0.27712	0.200243
Q9BV40	VAMP8	-0.228801	0.200631
Q9Y3P8	SIT1	-0.201904	0.201117
Q9UBQ7	GRHPR	-0.258387	0.201132
Q99795	GPA33	0.11817	0.201229
Q9NXZ2	DDX43	-0.260829	0.201562
P30040	ERP29	-0.243804	0.20179
Q01344	IL5RA	-0.125565	0.201948
P13584	CYP4B1	0.17846	0.201956
Q9UGK3	STAP2	0.275015	0.202049
Q8TD16	BICD2	-0.236479	0.202058
Q9HCB6	SPON1	0.147581	0.202075
P04216	THY1	0.200755	0.202121
Q8N8R7	ARL14EP	-0.155245	0.202256
Q03252	LMNB2	-0.213521	0.202336
Q8IYK8	REM2	-0.265185	0.202338
Q86UP6	CUZD1	-0.211402	0.202705
P26842	CD27	-0.203509	0.20291
Q15056	EIF4H	-0.259619	0.202935
Q9H977	WDR54	-0.215599	0.20296
Q5SW96	LDLRAP1	-0.258846	0.202963
Q9BWP8	COLEC11	0.178546	0.203078
Q9P2M7	CGN	0.112381	0.203452
P26718	KLRK1	-0.134962	0.203579
P32942	ICAM3	-0.138435	0.203644
Q96EZ8	MCRS1	0.171021	0.203688
Q14160	SCRIB	-0.19296	0.203747
Q9BRR8	GPATCH1	0.203754	0.203954
Q8TC05	MDM1	-0.164422	0.20459
Q8N5K1	CISD2	0.232025	0.205195
Q6ZVN8	HJV	0.238943	0.205205
Q14011	CIRBP	-0.214032	0.205276
A4FU49	SH3D21	-0.260018	0.205476
Q9Y266	NUDC	-0.22478	0.205954
Q8NHV1	GIMAP7	0.226409	0.206049
O00327	BMAL1	0.21936	0.206431
Q9H2U2	PPA2	-0.278337	0.206602
Q96N95	ZNF396	-0.27183	0.207295
O95257	GADD45G	-0.171356	0.207403
O60447	EVI5	-0.243083	0.207451
P29466	CASP1	0.262446	0.207466
Q9Y5Q3	MAFB	-0.199189	0.207575
P50453	SERPINB9	-0.245822	0.207666
O00253	AGRP	-0.142976	0.207763
Q8N535	LINC00471	-0.0845898	0.208094
Q6S8J7	POTEA	-0.158484	0.208162
Q9HC35	EML4	-0.262452	0.208254
Q6PK04	CCDC137	-0.27273	0.20844
Q9HAN9	NMNAT1	-0.160541	0.208567
O75167	PHACTR2	-0.25118	0.208719
Q86SQ7	SDCCAG8	-0.23693	0.208747
Q9UNE0	EDAR	-0.194412	0.208857
P40222	TXLNA	-0.247236	0.208922
Q96F83	CLBA1	0.258683	0.208994
Q9NS68	TNFRSF19	0.169407	0.20922
Q9H2K0	MTIF3	-0.255546	0.209322
Q03111	MLLT1	0.234081	0.209345
Q86YM7	HOMER1	-0.273051	0.209624
Q13287	NMI	-0.209682	0.209695
P27144	AK4	-0.226803	0.209863
P04233	CD74	-0.187573	0.210308
P01236	PRL	-0.158426	0.210335
Q99961	SH3GL1	-0.251061	0.210341
Q7Z4H7	HAUS6	0.206403	0.210398
P08582	MELTF	0.11173	0.210448
Q13867	BLMH	-0.180699	0.210483
Q12968	NFATC3	-0.191362	0.210633
P24071	FCAR	-0.156193	0.210998
P01037	CST1	0.0877994	0.211117
P35968	KDR	-0.20663	0.211585
Q8TF64	GIPC3	-0.256186	0.211985
P56645	PER3	-0.144683	0.212103
P55145	MANF	-0.245281	0.212328
P19878	NCF2	-0.187425	0.212945
Q86SJ2	AMIGO2	-0.172936	0.212969
Q15661	TPSAB1	0.0765777	0.213067
Q16644	MAPKAPK3	0.218225	0.213324
O15357	INPPL1	-0.247143	0.213353
Q9UKZ1	CNOT11	-0.162587	0.213665
Q9HCE0	EPG5	-0.190179	0.214063
P62330	ARF6	-0.206684	0.214068
Q9UBU3	GHRL	0.137169	0.214231
Q9H1H9	KIF13A	-0.13938	0.214323
Q9Y251	HPSE	-0.236285	0.214405
Q9Y314	NOSIP	0.195107	0.214545
P43405	SYK	-0.263681	0.21461
Q9P2M1	LRP2BP	-0.237563	0.214683
Q96PE7	MCEE	-0.181406	0.214709
Q96ST8	CEP89	0.152512	0.215496
Q9NZN3	EHD3	-0.26045	0.215512
A9UHW6	MIF4GD	-0.217971	0.215609
P37108	SRP14	-0.243673	0.215835
Q9P109	GCNT4	0.233923	0.215855
P35913	PDE6B	-0.270872	0.216743
P52630	STAT2	-0.242612	0.217007
Q9UP79	ADAMTS8	-0.173166	0.217007
Q96NL6	SCLT1	-0.163362	0.217106
Q9GZP8	IMUP	-0.240944	0.217147
Q9UHL0	DDX25	-0.24784	0.217149
Q08493	PDE4C	-0.126794	0.21734
Q8IYS4	DNAAF8	-0.220981	0.217379
P28290	ITPRID2	-0.231508	0.217612
Q9Y5J5	PHLDA3	0.120087	0.217805
Q7LDG7	RASGRP2	-0.235629	0.217832
O95447	LCA5L	0.198469	0.217838
Q96AY3	FKBP10	-0.171841	0.217868
P11684	SCGB1A1	-0.180231	0.218068
Q6P996	PDXDC1	-0.161308	0.218216
Q68DQ2	CRYBG3	-0.250663	0.218312
Q8IU57	IFNLR1	-0.110512	0.218566
Q9UKA1	FBXL5	0.20121	0.218626
Q9UGP4	LIMD1	-0.246655	0.21868
Q4VC05	BCL7A	0.186052	0.21874
O75688	PPM1B	-0.21964	0.218853
Q96D71	REPS1	-0.260521	0.218877
P19544	WT1	-0.246384	0.218902
Q7Z417	NUFIP2	0.239587	0.219045
O60566	BUB1B	-0.206754	0.21937
P62316	SNRPD2	-0.237971	0.219528
Q12836	ZP4	-0.238219	0.219907
Q71RC2	LARP4	0.227314	0.220066
P41222	PTGDS	-0.257222	0.220149
Q92854	SEMA4D	-0.197917	0.220289
Q9H1H1	GTSF1L	0.193631	0.220463
Q92753	RORB	0.160727	0.220739
Q6GTX8	LAIR1	-0.159553	0.221276
A1A4S6	ARHGAP10	-0.237487	0.22188
Q9GZT3	SLIRP	-0.198125	0.222398
Q9H1J1	UPF3A	0.199313	0.222711
Q96DU3	SLAMF6	-0.214549	0.223201
Q9NSQ0	RRP7BP	-0.182978	0.22329
Q6IE81	JADE1	0.19246	0.223437
P10644	PRKAR1A	-0.203241	0.223453
Q9BS26	ERP44	-0.180146	0.223891
Q02742	GCNT1	-0.180915	0.224161
Q9Y235	APOBEC2	0.267375	0.224239
Q9UHI6	DDX20	0.243284	0.224358
Q92932	PTPRN2	0.191053	0.224447
Q96Q35	FLACC1	0.0947255	0.22452
Q9UEE5	STK17A	0.244143	0.224524
Q02363	ID2	-0.195512	0.224698
Q6UB28	METAP1D	-0.226577	0.225213
Q9UEW8	STK39	-0.24173	0.225595
Q5T681	C10orf62	-0.265535	0.225602
Q5T124	UBXN11	0.218544	0.225606
Q14995	NR1D2	-0.151328	0.225642
O00161	SNAP23	-0.247414	0.225894
Q9NP85	NPHS2	-0.137157	0.22626
A2PYH4	HFM1	0.266594	0.226532
P12271	RLBP1	0.23532	0.226763
Q9Y496	KIF3A	-0.22951	0.226929
Q96D09	GPRASP2	0.215572	0.226956
Q16774	GUK1	0.241141	0.226985
P20794	MAK	-0.118488	0.227038
P13693	TPT1	0.132106	0.22717
Q9UKV0	HDAC9	0.193534	0.227385
P19622	EN2	0.194548	0.227581
Q9HCM3	KIAA1549	0.225114	0.227679
P08236	GUSB	-0.0798693	0.227737
D6RIA3	C4orf54	-0.183142	0.227781
Q05066	SRY	-0.13828	0.228031
Q6ZUX3	TOGARAM2	-0.218857	0.228097
P00748	F12	-0.152999	0.228266
Q9Y259	CHKB	0.154078	0.228618
P46531	NOTCH1	-0.177902	0.228822
P36941	LTBR	0.18772	0.228876
Q8IUZ0	LRRC49	0.169947	0.229383
Q969X0	RILPL2	-0.230853	0.229422
Q9C0F0	ASXL3	-0.260983	0.229423
Q5DX21	IGSF11	-0.262219	0.22952
Q9UQ07	MOK	0.166102	0.230161
P55774	CCL18	-0.102613	0.230173
P19525	EIF2AK2	-0.231113	0.230348
P35249	RFC4	-0.22395	0.230352
O00220	TNFRSF10A	-0.151307	0.230599
Q96PX9	PLEKHG4B	0.258187	0.231254
Q13651	IL10RA	-0.0910102	0.231413
O15240	VGF	0.168692	0.231549
Q8TCT0	CERK	0.195736	0.231819
C9J069	AJM1	-0.0959894	0.232044
Q96LT9	RNPC3	-0.25825	0.232116
A1A5D9	BICDL2	-0.232247	0.232209
Q96I13	ABHD8	-0.186201	0.232743
Q17RY6	LY6K	-0.208944	0.233043
Q96MF4	CCDC140	0.213257	0.233282
Q96BQ5	CCDC127	0.144378	0.233462
Q96A49	SYAP1	-0.263619	0.233478
Q15326	ZMYND11	-0.170395	0.233481
Q08629	SPOCK1	0.178476	0.23411
P19484	TFEB	-0.195511	0.234122
Q9UPQ7	PDZRN3	0.167934	0.234174
Q9NPJ3	ACOT13	-0.226198	0.234232
Q9UJQ4	SALL4	0.228915	0.234386
Q96HC4	PDLIM5	-0.23149	0.234568
Q7RTW8	OTOA	-0.196456	0.234904
Q9UPZ3	HPS5	0.262895	0.234908
Q8NAX2	KDF1	-0.21518	0.234981
P32298	GRK4	-0.263935	0.235227
P15018	LIF	-0.132234	0.235423
P54652	HSPA2	-0.22057	0.235424
Q8N878	FRMD1	-0.219824	0.235497
O15194	CTDSPL	0.217823	0.235518
P32320	CDA	-0.146597	0.235779
Q8WTT0	CLEC4C	-0.110572	0.235802
Q8IWV7	UBR1	-0.229825	0.235818
Q6K0P9	PYHIN1	-0.192818	0.236237
Q8WV44	TRIM41	-0.228867	0.236299
Q86X02	CDR2L	-0.216395	0.236376
Q8IWT1	SCN4B	0.153458	0.236763
O75674	TOM1L1	-0.182147	0.23681
Q6ICG8	WBP2NL	0.263824	0.237307
P09105	HBQ1	-0.220883	0.23739
Q9H6S3	EPS8L2	-0.179856	0.237433
O15539	RGS5	0.256748	0.237742
Q86XP1	DGKH	-0.181699	0.237937
Q16836	HADH	0.209934	0.238759
O60890	OPHN1	-0.237773	0.238787
Q6ZVM7	TOM1L2	-0.26344	0.238844
P61764	STXBP1	-0.228725	0.239122
Q6UY14	ADAMTSL4	-0.164077	0.239306
P29965	CD40LG	-0.234991	0.239399
P27930	IL1R2	-0.149164	0.239527
Q9H1P3	OSBPL2	-0.165051	0.23956
Q9NQX4	MYO5C	0.177867	0.239856
O75144	ICOSLG	-0.187085	0.239992
P78423	CX3CL1	-0.211973	0.240109
P51956	NEK3	-0.176451	0.240183
Q96MC5	BMERB1	0.193324	0.240342
P12644	BMP4	0.196671	0.240384
P07602	PSAP	-0.139058	0.2406
P18887	XRCC1	-0.180495	0.240616
P49757	NUMB	-0.224667	0.240741
Q8N4N8	KIF2B	0.245907	0.240912
Q9H7T3	C10orf95	0.166744	0.241048
P16035	TIMP2	-0.158005	0.241075
Q8N4F0	BPIFB2	-0.141074	0.241315
P27352	CBLIF	-0.0843888	0.241339
P11274	BCR	-0.252564	0.241812
O60763	USO1	-0.248503	0.241969
Q8N0X7	SPART	-0.23713	0.242105
Q05193	DNM1	-0.214156	0.242392
Q5T2T1	MPP7	-0.223374	0.242408
Q12798	CETN1	-0.166042	0.242846
Q10589	BST2	-0.160979	0.243032
O14645	DNALI1	0.200003	0.24321
O43164	PJA2	-0.220142	0.243701
Q9HAT2	SIAE	-0.16866	0.244004
Q9BY42	RTF2	-0.153907	0.244055
Q96NZ9	PRAP1	-0.131318	0.244216
Q7RTR0	NLRP9	0.255662	0.244591
P08575	PTPRC	-0.17186	0.244621
Q8TDR0	TRAF3IP1	0.229727	0.244691
Q96N16	JAKMIP1	0.210724	0.244853
Q30KQ4	DEFB116	-0.190322	0.244935
P28222	HTR1B	-0.246219	0.244973
P05089	ARG1	-0.213339	0.245123
Q9BXF9	TEKT3	-0.141191	0.245129
B0I1T2	MYO1G	0.234128	0.245135
A9QM74	KPNA7	0.253507	0.24523
Q96BQ1	FAM3D	0.0899692	0.245489
B0FP48	UPK3BL1	-0.187309	0.245615
P09769	FGR	-0.22219	0.246286
P02724	GYPA	0.231405	0.246402
P49366	DHPS	-0.101455	0.246959
Q8NA70	FAM47B	0.124897	0.247011
Q8IX30	SCUBE3	-0.128431	0.247037
Q9NVF7	FBXO28	-0.221199	0.247132
Q16655	MLANA	-0.256836	0.247342
Q12805	EFEMP1	0.205029	0.247488
Q86W92	PPFIBP1	-0.170693	0.247532
Q00796	SORD	-0.173994	0.247538
Q92558	WASF1	-0.217709	0.247559
Q52LR7	EPC2	0.197221	0.247863
Q03393	PTS	-0.185611	0.248029
Q15113	PCOLCE	0.179014	0.248591
Q8N0Z6	TTC5	0.227498	0.248679
P08185	SERPINA6	-0.169582	0.248913
Q9BPX1	HSD17B14	-0.0932465	0.249719
O75912	DGKI	-0.22064	0.250097
Q14807	KIF22	-0.195423	0.250098
Q96R05	RBP7	-0.161248	0.250315
P47712	PLA2G4A	-0.219743	0.250492
P00352	ALDH1A1	-0.213194	0.250903
Q8NDA2	HMCN2	0.116054	0.250988
P68400	CSNK2A1	0.187071	0.251012
Q9BU70	TRMO	-0.172659	0.251027
Q7Z6K5	ARPIN	-0.253776	0.251328
Q8WVZ9	KBTBD7	-0.245986	0.252216
5	FUT3	-0.108345	0.252307
Q6BCY4	CYB5R2	-0.203319	0.252588
Q9Y6F1	PARP3	-0.200959	0.2529
Q8N8E1	MAPKAPK5-AS1	0.127497	0.252985
Q8TC84	FANK1	0.159234	0.253207
A6NNL0	NUTM2B	0.232525	0.253255
O00203	AP3B1	-0.208644	0.253335
O95567	C22orf31	-0.206344	0.253776
Q9NXZ1	SAGE1	0.241648	0.253875
O00592	PODXL	-0.169557	0.254215
P51460	INSL3	0.119232	0.2545
Q5T7N3	KANK4	0.233734	0.254534
Q8NDW8	TTC21A	-0.185416	0.254556
Q8NFP7	NUDT10	-0.241796	0.254769
O43150	ASAP2	-0.24486	0.25504
P17812	CTPS1	0.214743	0.255066
Q8TDX7	NEK7	-0.196702	0.255152
Q14149	MORC3	-0.226512	0.255387
Q96A56	TP53INP1	0.139595	0.255467
Q6ZU52	KIAA0408	-0.222278	0.255625
P0DKB5	TPBGL	-0.218108	0.255791
O95835	LATS1	-0.208723	0.256125
O43670	ZNF207	-0.157621	0.256421
Q8IXW5	RPAP2	0.14598	0.256443
A6NDY2	FAM90A10	0.0658471	0.256568
Q13277	STX3	-0.211686	0.257067
Q6IAA8	LAMTOR1	-0.22339	0.25723
Q9Y575	ASB3	0.246585	0.257535
O75312	ZPR1	-0.16281	0.257586
O60880	SH2D1A	0.22135	0.25766
P36776	LONP1	-0.221488	0.257694
P12429	ANXA3	-0.201282	0.257897
Q7L2H7	EIF3M	-0.232062	0.257912
Q14839	CHD4	-0.157272	0.257996
O15117	FYB1	-0.221269	0.258
P49758	RGS6	-0.221621	0.258141
Q15170	TCEAL1	-0.215815	0.258192
Q9Y217	MTMR6	-0.168571	0.258491
Q14956	GPNMB	-0.162092	0.258764
Q13509	TUBB3	0.24842	0.258849
O60282	KIF5C	-0.242567	0.259145
P51161	FABP6	-0.180353	0.259623
Q8N0Z9	VSIG10	-0.120137	0.259745
Q9NX31	OSER1	-0.222971	0.259945
Q8WU39	MZB1	-0.144837	0.259972
Q05516	ZBTB16	-0.208864	0.26009
Q9UBV4	WNT16	-0.193906	0.260227
P01589	IL2RA	-0.138775	0.26029
A6NMZ2	SNTN	-0.204646	0.260354
P43007	SLC1A4	0.250627	0.260642
O15305	PMM2	-0.231905	0.261033
Q70EL4	USP43	-0.181273	0.261117
Q16566	CAMK4	0.125373	0.261223
Q9UM07	PADI4	-0.166642	0.261251
O43310	CTIF	-0.22132	0.261491
P98082	DAB2	-0.202051	0.261759
Q8N806	UBR7	-0.191743	0.261922
Q08431	MFGE8	-0.091279	0.262425
Q9Y6D9	MAD1L1	-0.186512	0.262483
Q8N7F7	UBL4B	0.15155	0.262558
P20849	COL9A1	-0.150869	0.26259
Q96PV7	FAM193B	-0.186492	0.262845
P01732	CD8A	-0.110425	0.262882
Q9HCJ2	LRRC4C	-0.223342	0.263139
O75791	GRAP2	-0.224503	0.263158
Q5JYT7	KIAA1755	0.154088	0.263238
Q15126	PMVK	-0.217765	0.26331
Q14197	MRPL58	0.129121	0.263454
P10696	ALPG	-0.0599869	0.263641
Q07812	BAX	0.180392	0.264098
P43320	CRYBB2	-0.0775598	0.264402
P34947	GRK5	-0.14816	0.26469
Q96A19	CCDC102A	0.184088	0.26516
Q9H2F5	EPC1	0.212121	0.265227
Q96JG8	MAGED4	0.215393	0.265371
A2RTX5	TARS3	0.247485	0.26545
O15265	ATXN7	-0.23677	0.265485
P51606	RENBP	-0.23278	0.265574
Q96L34	MARK4	0.238795	0.265889
P0C671	BNIP5	-0.24161	0.266374
Q13451	FKBP5	-0.205775	0.266457
Q16769	QPCT	-0.11914	0.266595
Q7L311	ARMCX2	-0.238486	0.266828
P40225	THPO	-0.156023	0.26713
Q9Y4C8	RBM19	-0.205047	0.267184
Q13976	PRKG1	-0.2147	0.267477
O60336	MAPKBP1	-0.112193	0.267554
O15018	PDZD2	0.209198	0.267627
Q7Z5A9	TAFA1	-0.138331	0.26764
Q9UPR6	ZFR2	-0.151536	0.268176
Q9BQ70	TCF25	-0.183511	0.268806
Q13094	LCP2	-0.221194	0.268932
Q14204	DYNC1H1	-0.208372	0.270025
Q9UPN4	CEP131	-0.217157	0.270061
P08397	HMBS	-0.216105	0.270688
Q68CL5	TPGS2	-0.125298	0.271172
Q9BQI3	EIF2AK1	0.194622	0.271173
Q9UHY8	FEZ2	-0.24026	0.271232
Q5JTW2	CEP78	0.232826	0.271251
Q5T5Y3	CAMSAP1	-0.216791	0.271594
P42701	IL12RB1	-0.196953	0.271601
O75489	NDUFS3	0.201017	0.271758
Q9BZC7	ABCA2	0.213026	0.271864
Q9ULL1	PLEKHG1	0.202696	0.272139
P29372	MPG	-0.206358	0.272266
P46926	GNPDA1	-0.215427	0.272338
P35052	GPC1	0.140912	0.273635
O96004	HAND1	0.170188	0.27383
Q8WTV1	THAP3	-0.139976	0.273991
Q96A22	C11orf52	-0.149842	0.274605
O95299	NDUFA10	0.206449	0.274656
Q03828	EVX2	-0.195889	0.274663
Q5JPB2	ZNF831	-0.104498	0.274755
Q15067	ACOX1	-0.143326	0.275574
Q92974	ARHGEF2	-0.237105	0.27569
O00522	KRIT1	0.193911	0.275822
Q15773	MLF2	-0.211147	0.27585
Q13137	CALCOCO2	-0.223404	0.275884
Q8IW35	CEP97	0.181926	0.275964
Q14108	SCARB2	-0.137869	0.276049
Q9P0K1	ADAM22	-0.186559	0.276312
Q96D42	HAVCR1	-0.0917691	0.276483
P16455	MGMT	-0.193784	0.276488
O76038	SCGN	0.138366	0.276573
O00748	CES2	-0.142395	0.276621
P06239	LCK	-0.160964	0.276677
P50552	VASP	-0.207315	0.276789
Q92911	SLC5A5	0.146533	0.276921
Q96C45	ULK4	-0.121632	0.276999
Q9NQ84	GPRC5C	0.228526	0.277142
Q5T5A4	CFAP276	-0.227759	0.277703
Q01459	CTBS	-0.105167	0.277852
P10767	FGF6	-0.240802	0.278336
Q07108	CD69	-0.202502	0.278401
Q8IYX8	CEP57L1	-0.204447	0.278594
Q96FE7	PIK3IP1	0.171338	0.278825
Q8TDH9	BLOC1S5	-0.137513	0.279031
Q9H4B6	SAV1	-0.226177	0.279094
Q5VTH2	CFAP126	0.204	0.279101
Q96LB9	PGLYRP3	-0.154455	0.279165
O15444	CCL25	-0.132429	0.279181
Q86TM3	DDX53	0.214185	0.279516
P12882	MYH1	-0.177438	0.27987
P50458	LHX2	0.201819	0.279914
P13667	PDIA4	-0.190575	0.279932
Q01973	ROR1	0.158055	0.279949
Q9NSA1	FGF21	-0.114339	0.280492
Q8TEQ0	SNX29	-0.2145	0.280745
P50221	MEOX1	0.176693	0.281067
Q07065	CKAP4	0.169323	0.281541
Q16891	IMMT	-0.217281	0.281709
Q9UKA4	AKAP11	-0.107432	0.281743
P05230	FGF1	-0.229508	0.282382
Q9UNK4	PLA2G2D	-0.101611	0.282811
O95971	CD160	-0.0942658	0.28287
O15169	AXIN1	-0.212414	0.283155
Q9Y6K9	IKBKG	-0.229174	0.283395
A3KMH1	VWA8	-0.170683	0.283492
O76061	STC2	0.187687	0.283583
P08133	ANXA6	0.193063	0.283805
Q8N4C8	MINK1	-0.209067	0.283961
Q01151	CD83	-0.104792	0.283985
P01189	POMC	-0.140855	0.284197
Q6P9F5	TRIM40	0.227239	0.284365
P31629	HIVEP2	-0.204284	0.28554
O43739	CYTH3	0.219067	0.285557
O43399	TPD52L2	-0.211679	0.285735
Q9H2X3	CLEC4M	0.123775	0.286236
Q9P0W8	SPATA7	0.168863	0.286321
Q96QF0	RAB3IP	-0.215874	0.286444
Q86WT6	TRIM69	-0.238301	0.286519
Q9C0C2	TNKS1BP1	0.224568	0.286639
P04792	HSPB1	-0.197558	0.286725
O95183	VAMP5	-0.213148	0.286747
P01579	IFNG	0.192452	0.287309
Q9UKW6	ELF5	0.133544	0.28777
Q5JSP0	FGD3	-0.222821	0.287771
Q86VF7	NRAP	-0.209992	0.288102
Q9UKL0	RCOR1	-0.189676	0.288438
P09871	C1S	-0.205678	0.288814
Q9HBG7	LY9	-0.124035	0.289063
Q9NUY8	TBC1D23	-0.200375	0.289506
Q7Z4V5	HDGFL2	-0.171198	0.289538
Q8IYB5	SMAP1	-0.163799	0.28996
Q96G03	PGM2	0.13037	0.290169
P86397	HTD2	-0.166195	0.290666
P56817	BACE1	-0.185459	0.290666
Q92613	JADE3	0.199533	0.290703
Q9HC62	SENP2	-0.223834	0.291133
Q99426	TBCB	-0.214735	0.291232
Q8NHS0	DNAJB8	-0.119579	0.292096
Q96AJ9	VTI1A	-0.212706	0.292134
P13473	LAMP2	-0.207685	0.292167
O94991	SLITRK5	-0.182715	0.292341
P19957	PI3	-0.109804	0.292402
A8MW92	PHF20L1	-0.235367	0.292477
Q6UWN8	SPINK6	0.124379	0.29267
Q96S07	PRR25	-0.0984493	0.292702
Q9UKJ1	PILRA	-0.119583	0.292858
Q14696	MESD	-0.196596	0.292863
Q5GAN6	RNASE10	0.0908073	0.293164
O43598	DNPH1	-0.208014	0.293257
Q4V328	GRIPAP1	-0.213816	0.293278
P55285	CDH6	0.156536	0.29333
P47736	RAP1GAP	0.158929	0.29345
Q96G46	DUS3L	0.153351	0.29362
P21964	COMT	-0.212096	0.293687
A6NN90	C2orf81	-0.181089	0.293977
Q59EK9	RUNDC3A	0.19819	0.293989
P20807	CAPN3	0.153085	0.294
O94941	UBOX5	-0.217762	0.294034
Q6UXZ4	UNC5D	0.207012	0.294076
P23229	ITGA6	-0.191495	0.294306
Q9BY71	LRRC3	-0.232306	0.29441
P05026	ATP1B1	0.190577	0.294564
P48960	ADGRE5	-0.127523	0.294643
Q00722	PLCB2	-0.211035	0.294705
P01222	TSHB	-0.106576	0.294888
Q9ULL8	SHROOM4	0.193444	0.294935
P02008	HBZ	-0.104397	0.294948
Q6IBS0	TWF2	-0.211255	0.295007
Q96RD9	FCRL5	-0.101923	0.295087
O00499	BIN1	-0.172616	0.295418
P54819	AK2	-0.220121	0.295576
Q13112	CHAF1B	0.166769	0.296196
Q5HYN5	CT45A1	-0.202055	0.296218
Q96E17	RAB3C	-0.218597	0.296285
Q9NQT8	KIF13B	-0.225537	0.296626
Q8N556	AFAP1	-0.117683	0.296737
A6NGE7	URAD	-0.222219	0.29675
Q14008	CKAP5	-0.202525	0.296915
B6SEH8	ERVV-1	-0.212973	0.297195
Q06141	REG3A	-0.116071	0.297304
P14091	CTSE	-0.175846	0.297344
A8MT33	SYCE1L	0.155027	0.297492
Q8NCX0	CCDC150	0.180407	0.297574
P52823	STC1	0.137481	0.297674
Q16520	BATF	0.136072	0.297695
2	TSPY3	0.206182	0.297805
O43278	SPINT1	-0.117892	0.298068
Q6NUN0	ACSM5	0.170431	0.299229
Q9UJZ1	STOML2	0.162573	0.299252
Q9H6T3	RPAP3	-0.212731	0.299706
Q9Y4K0	LOXL2	0.207367	0.299917
Q16760	DGKD	-0.217967	0.300136
Q9UHB4	NDOR1	0.218349	0.30025
P32241	VIPR1	0.231852	0.300402
O95750	FGF19	0.180431	0.300438
Q53GL0	PLEKHO1	-0.202768	0.300595
Q8N9N2	ASCC1	-0.20865	0.300619
O75956	CDK2AP2	0.205008	0.300703
Q9HCU5	PREB	0.217039	0.300753
P37837	TALDO1	-0.210723	0.300928
O95727	CRTAM	-0.0820067	0.300945
P18428	LBP	-0.212123	0.301005
Q6PCB0	VWA1	-0.136864	0.301191
P07355	ANXA2	-0.190778	0.301438
Q6NYC1	JMJD6	-0.208609	0.302001
P82094	TMF1	-0.206717	0.302097
Q6QNK2	ADGRD1	-0.121735	0.302432
P78552	IL13RA1	-0.139406	0.302497
Q96CN4	EVI5L	-0.215418	0.302506
O15061	SYNM	0.143552	0.302594
P41217	CD200	-0.176883	0.302764
Q9BW30	TPPP3	-0.127668	0.302888
O60542	PSPN	-0.0791582	0.303092
O75871	CEACAM4	-0.165133	0.303093
Q8N111	CEND1	0.112943	0.303254
P35228	NOS2	-0.163487	0.303381
Q9NR20	DYRK4	0.193557	0.304003
Q92520	FAM3C	0.166855	0.30404
Q68D85	NCR3LG1	-0.14637	0.304073
Q9H7C9	AAMDC	-0.179811	0.304292
Q6IN84	MRM1	-0.198835	0.304335
Q9UBF1	MAGEC2	0.174692	0.304383
Q9ULE4	FAM184B	-0.164262	0.304399
Q12846	STX4	-0.196882	0.304441
O43280	TREH	-0.051634	0.30454
P09874	PARP1	-0.211079	0.304636
Q9BV73	CEP250	-0.214016	0.305066
Q96AX2	RAB37	-0.196518	0.305162
O15467	CCL16	-0.12911	0.305258
Q8TEW8	PARD3B	-0.0601564	0.305268
Q9Y223	GNE	-0.173286	0.305275
P25774	CTSS	-0.12715	0.305614
O00422	SAP18	0.194298	0.30587
Q96S42	NODAL	0.227534	0.306156
Q92888	ARHGEF1	-0.199549	0.306233
P36897	TGFBR1	-0.160224	0.306373
O75293	GADD45B	-0.226854	0.306758
Q9UQB8	BAIAP2	-0.159053	0.306883
O60662	KLHL41	-0.152599	0.30698
P20042	EIF2S2	-0.214191	0.307157
P03951	F11	-0.131178	0.307198
Q14258	TRIM25	-0.19654	0.307295
Q9UN19	DAPP1	-0.177962	0.307388
Q12778	FOXO1	-0.201347	0.307505
Q6PIW4	FIGNL1	0.17279	0.307609
Q6PL24	TMED8	-0.201539	0.307635
Q8N4H0	SPATA6L	-0.135772	0.307948
O60268	KIAA0513	-0.20434	0.308226
Q99807	COQ7	-0.174624	0.308268
O14867	BACH1	-0.209744	0.30833
P05091	ALDH2	-0.101624	0.308355
Q9NWD8	TMEM248	-0.21853	0.308565
Q9H7T9	AUNIP	-0.16541	0.308568
P04155	TFF1	0.098078	0.30859
P36888	FLT3	0.112985	0.308845
Q7Z6B0	CCDC91	0.191687	0.308865
O95171	SCEL	-0.157839	0.309295
Q9BXI3	NT5C1A	-0.203882	0.309732
Q9NRR4	DROSHA	-0.138316	0.310041
Q9Y5S2	CDC42BPB	-0.207194	0.310086
Q17RW2	COL24A1	-0.146152	0.31012
Q69YN2	CWF19L1	-0.159227	0.310621
Q96L15	ART5	0.185678	0.310936
Q9P260	RELCH	-0.202519	0.310955
Q8IWB1	ITPRIP	-0.203321	0.311033
Q99501	GAS2L1	-0.183116	0.311625
Q9NXN4	GDAP2	0.22263	0.312598
Q6IN97	FRMPD2B	-0.216282	0.312724
P49908	SELENOP	-0.160563	0.312775
Q5TA50	CPTP	0.203396	0.312942
Q70CQ2	USP34	0.214601	0.313078
Q9NVF9	ETNK2	-0.1277	0.313133
O95397	PLEKHA8P1	-0.214805	0.313253
Q7Z3T8	ZFYVE16	0.202231	0.313262
Q6PIL6	KCNIP4	-0.201115	0.313271
Q9BW85	YJU2	-0.224123	0.31332
Q7Z572	SPATA21	-0.14977	0.313397
Q9Y6I3	EPN1	-0.216196	0.313424
Q8IWP9	CCDC28A	0.107861	0.313646
P00740	F9	-0.166933	0.313881
P50452	SERPINB8	-0.109107	0.314007
Q96PY0	PSMG3-AS1	0.20445	0.314202
Q8IYM0	FAM186B	0.221158	0.314646
P62987	UBA52	-0.119738	0.314792
P23771	GATA3	-0.199215	0.315311
Q9Y2E5	MAN2B2	-0.102087	0.315373
Q5FWF4	ZRANB3	0.206102	0.315408
Q99439	CNN2	-0.200283	0.315548
Q8N6Q1	TMCO5A	-0.200755	0.315678
Q96KD3	GARIN1B	-0.127038	0.315683
P20155	SPINK2	-0.125328	0.31613
P36873	PPP1CC	-0.194927	0.316514
P14780	MMP9	-0.122666	0.316747
A6NKC9	SH2D7	0.114275	0.317013
Q9H8U3	ZFAND3	-0.157261	0.317021
P17980	PSMC3	0.210161	0.317079
Q7Z7A1	CNTRL	-0.178419	0.317146
Q92876	KLK6	0.142801	0.317405
P11049	CD37	0.215462	0.317596
O00144	FZD9	-0.171842	0.317745
O00401	WASL	-0.0974535	0.317918
P54577	YARS1	-0.202387	0.318001
Q96EM0	L3HYPDH	-0.174268	0.318185
P55039	DRG2	-0.215118	0.318333
P32004	L1CAM	-0.145782	0.31847
P13688	CEACAM1	-0.218912	0.319134
Q7Z6M1	RABEPK	0.194616	0.319431
Q9BXJ7	AMN	0.120435	0.319502
Q9C005	DPY30	-0.173812	0.319766
P15291	B4GALT1	-0.156272	0.319845
Q14142	TRIM14	0.140707	0.32016
Q9BX10	GTPBP2	-0.217972	0.320549
O95644	NFATC1	-0.19938	0.320622
P53420	COL4A4	0.215947	0.321093
Q765P7	MTSS2	-0.17813	0.321236
Q8TEA8	DTD1	-0.190805	0.321313
Q5T6C5	ATXN7L2	0.147771	0.321316
P0DOY2	IGLC2	-0.135204	0.321344
P30049	ATP5F1D	0.198013	0.321913
Q6J272	FAM166A	-0.179098	0.321994
P31751	AKT2	-0.186635	0.322202
O95544	NADK	-0.159945	0.322298
Q659C4	LARP1B	-0.190146	0.322374
P24158	PRTN3	-0.127562	0.322422
B2RU33	POTEC	-0.11614	0.322488
Q96QH2	PRAM1	-0.0880859	0.322829
Q6ZU65	UBN2	-0.185409	0.323037
Q8IZF2	ADGRF5	-0.192612	0.323042
P53582	METAP1	0.162129	0.323314
P39059	COL15A1	0.165156	0.323357
O75154	RAB11FIP3	-0.204254	0.323494
P03372	ESR1	0.212881	0.32358
Q8IZD0	SAMD14	-0.186586	0.323725
O60308	CEP104	-0.186391	0.324048
Q8TCX1	DYNC2LI1	0.196455	0.324057
Q8WX77	IGFBPL1	0.112496	0.324173
Q96MM7	HS6ST2	0.133204	0.324194
Q96F10	SAT2	-0.0899537	0.324249
P05412	JUN	0.190981	0.324373
P50851	LRBA	-0.207251	0.324454
Q9Y4C5	CHST2	-0.146007	0.324465
P03956	MMP1	0.120522	0.324923
Q14353	GAMT	-0.210371	0.324971
Q8IYS5	OSCAR	-0.159472	0.325088
O94813	SLIT2	0.139067	0.325638
Q9BRP8	PYM1	-0.192193	0.325717
Q7Z5R6	APBB1IP	-0.198285	0.325726
Q05315	CLC	-0.120188	0.32594
P36980	CFHR2	-0.119168	0.32633
Q09428	ABCC8	0.165912	0.326531
P19438	TNFRSF1A	-0.146425	0.326549
Q15788	NCOA1	-0.172743	0.326666
Q49A92	C8orf34	-0.0970465	0.326749
P29353	SHC1	0.0931755	0.327423
Q9HCM7	FBRSL1	0.0674612	0.327495
P78549	NTHL1	0.134564	0.327499
Q7L8S5	OTUD6A	-0.182414	0.327523
Q6RI45	BRWD3	0.158078	0.327583
Q92935	EXTL1	0.0925504	0.327632
Q96KG7	MEGF10	0.147293	0.328262
Q96T60	PNKP	-0.19895	0.32857
P05113	IL5	-0.151953	0.328608
O60760	HPGDS	-0.156968	0.328699
P07711	CTSL	-0.152053	0.328879
O15111	CHUK	-0.195404	0.329121
Q15714	TSC22D1	-0.209845	0.329153
P03973	SLPI	-0.133484	0.329223
Q9P2F6	ARHGAP20	-0.123481	0.329296
Q9UQP3	TNN	-0.0736729	0.329543
P0CB47	UBTFL1	0.159879	0.330034
Q96A25	TMEM106A	-0.176938	0.330338
Q8WZA9	IRGQ	-0.19809	0.33041
P14778	IL1R1	-0.114545	0.33045
O95372	LYPLA2	-0.0861457	0.330735
Q8TDQ1	CD300LF	-0.0635612	0.331257
P10721	KIT	-0.113975	0.331317
Q12802	AKAP13	-0.106243	0.331444
P06127	CD5	-0.120131	0.331465
P19320	VCAM1	0.129428	0.331672
Q14207	NPAT	-0.189046	0.331732
Q9BQB4	SOST	-0.130908	0.332329
Q99704	DOK1	-0.205189	0.332366
Q9UKW4	VAV3	-0.193529	0.332466
Q9H009	NACA2	0.196974	0.332671
P30740	SERPINB1	-0.192917	0.33287
Q96PQ0	SORCS2	0.184318	0.332894
Q96EA4	SPDL1	-0.125119	0.332963
P55283	CDH4	0.17945	0.332985
Q9HD26	GOPC	-0.206761	0.333597
Q9NPI5	NMRK2	-0.191392	0.333706
O75339	CILP	0.142188	0.333817
Q9HA90	EFCC1	-0.205128	0.334636
Q86T23	CROCCP2	0.208063	0.334655
P37235	HPCAL1	-0.16957	0.334835
Q9BW66	CINP	0.182002	0.334896
O75553	DAB1	0.137614	0.335112
Q13291	SLAMF1	-0.124025	0.335141
F5H4B4	FAM227A	0.196113	0.335197
Q92918	MAP4K1	0.211649	0.335354
O00151	PDLIM1	-0.188694	0.335471
Q8WWW0	RASSF5	-0.17819	0.335503
P54826	GAS1	-0.151717	0.335572
Q9NQV5	PRDM11	-0.181241	0.336136
P50553	ASCL1	-0.188366	0.33645
Q9H7P9	PLEKHG2	0.142466	0.336485
O43301	HSPA12A	-0.168924	0.336751
Q96KQ4	PPP1R13B	0.160744	0.336995
Q9UHY7	ENOPH1	0.140759	0.337531
P26927	MST1	-0.0643528	0.337588
Q9H9S0	NANOG	-0.210559	0.337778
Q9UJX5	ANAPC4	-0.208249	0.338067
P09466	PAEP	-0.0504681	0.338263
P17213	BPI	-0.170825	0.338324
P51397	DAP	-0.188281	0.338656
O43316	PAX4	-0.207476	0.33881
Q07283	TCHH	-0.101106	0.338891
Q7Z5L4	SPATA19	0.19784	0.339242
Q99447	PCYT2	-0.165373	0.33927
Q15025	TNIP1	-0.184888	0.339494
Q14872	MTF1	0.145472	0.339591
O14668	PRRG1	-0.189882	0.339939
Q9HB71	CACYBP	-0.182716	0.340199
Q8N2G4	LYPD1	-0.14409	0.340438
Q9Y4R8	TELO2	0.173372	0.340629
Q8IZ08	GPR135	0.132046	0.340957
P11226	MBL2	-0.0559598	0.341177
Q96RE7	NACC1	-0.15389	0.341412
Q8WTV0	SCARB1	-0.0946087	0.341441
O14958	CASQ2	0.207689	0.341676
Q5H943	CT83	0.128661	0.342004
O95622	ADCY5	0.170749	0.342278
Q2M1K9	ZNF423	0.0962114	0.34267
Q7Z698	SPRED2	-0.190499	0.342688
P24001	IL32	0.12042	0.342704
P13747	HLA-E	-0.0813198	0.342787
Q14849	STARD3	-0.184331	0.342904
Q8NDI1	EHBP1	-0.180068	0.343005
P07320	CRYGD	-0.131257	0.343164
Q16864	ATP6V1F	0.199911	0.343679
O60934	NBN	0.182676	0.34371
Q07325	CXCL9	-0.0979381	0.344009
Q96M60	FAM227B	-0.180066	0.344182
Q9UK85	DKKL1	-0.058417	0.344239
P00747	PLG	-0.152535	0.34431
O75563	SKAP2	-0.181258	0.344374
Q8WWY7	WFDC12	0.0941504	0.345048
P18627	LAG3	-0.109266	0.345838
Q8TBZ2	MYCBPAP	0.159283	0.345868
O75460	ERN1	-0.143521	0.346034
Q12982	BNIP2	-0.206972	0.346063
Q9H5N1	RABEP2	-0.178287	0.346085
O14841	OPLAH	-0.177705	0.346259
Q07011	TNFRSF9	-0.147071	0.346359
P04141	CSF2	-0.178352	0.346941
P63313	TMSB10	-0.145006	0.347379
Q9H019	MTFR1L	-0.183737	0.34738
P50579	METAP2	-0.183768	0.347383
Q8NFZ4	NLGN2	-0.102335	0.347542
Q96S96	PEBP4	0.0285644	0.347739
Q96BZ8	LENG1	-0.16213	0.347807
P55211	CASP9	-0.174072	0.348053
Q93015	NAA80	-0.180052	0.348077
Q9UNT1	RABL2B	-0.192001	0.348414
Q96MF7	NSMCE2	-0.207829	0.348873
P34998	CRHR1	-0.170418	0.34909
Q9NWQ8	PAG1	-0.181708	0.34932
A2VCK2	DCDC2B	-0.134196	0.349505
Q6UXH1	CRELD2	-0.119167	0.349698
O43508	TNFSF12	0.133615	0.349739
O75794	CDC123	-0.104532	0.349753
Q6EBC2	IL31	-0.160227	0.35006
P80370	DLK1	0.0764585	0.350235
Q9UGB7	MIOX	0.186944	0.35032
P04062	GBA1	-0.128032	0.350348
P20929	NEB	0.168923	0.350577
Q30KQ8	DEFB112	0.115787	0.350798
P0DPI2	GATD3	-0.133336	0.350891
Q99576	TSC22D3	-0.180873	0.351357
Q9BW04	SARG	-0.164318	0.351469
Q14678	KANK1	0.170226	0.351498
P02749	APOH	-0.192139	0.351739
P33316	DUT	-0.173769	0.35183
P42574	CASP3	-0.190227	0.351943
Q99615	DNAJC7	-0.18642	0.352002
P29376	LTK	-0.0802223	0.352097
P49767	VEGFC	0.133857	0.352284
O60884	DNAJA2	-0.190672	0.352523
Q9BRR0	ZKSCAN3	0.121319	0.352841
Q9NR12	PDLIM7	-0.17521	0.352994
Q92538	GBF1	-0.205829	0.353288
Q8ND90	PNMA1	0.180273	0.353614
Q7L3B6	CDC37L1	0.16567	0.353766
P12931	SRC	-0.178803	0.353824
Q9UJC5	SH3BGRL2	0.129589	0.353983
Q8IVF7	FMNL3	-0.197722	0.35417
P32971	TNFSF8	-0.17224	0.354349
Q6NW40	RGMB	0.152049	0.354588
Q9UHC6	CNTNAP2	-0.100679	0.354626
Q6ZMT1	STAC2	-0.183089	0.354633
A8MVW0	FAM171A2	-0.0478674	0.354778
C9JL84	HHLA1	-0.204368	0.354781
Q16181	SEPTIN7	0.201071	0.35563
P80303	NUCB2	-0.166789	0.355779
Q14093	CYLC2	0.126654	0.355864
P86452	ZBED6	-0.134928	0.356429
Q8IVE3	PLEKHH2	-0.132048	0.356609
Q92890	UFD1	-0.184755	0.356703
Q08209	PPP3CA	0.199968	0.35686
P08134	RHOC	-0.180278	0.357019
Q8WTS1	ABHD5	0.181048	0.357097
O14529	CUX2	-0.130264	0.357185
O14974	PPP1R12A	-0.174196	0.357239
P56470	LGALS4	0.109862	0.357377
O76039	CDKL5	-0.200892	0.357531
CGB8	CGB3	0.205564	0.357682
Q8N5U6	RNF10	-0.151264	0.35799
Q9BXR6	CFHR5	-0.140051	0.358059
P02792	FTL	-0.143926	0.358148
Q9H7Y0	DIPK2B	0.136785	0.358206
Q5TKA1	LIN9	-0.201833	0.358292
Q5T655	CFAP58	-0.135712	0.358321
O94919	ENDOD1	-0.197233	0.358397
P20472	PVALB	-0.155027	0.358501
O75031	HSF2BP	-0.136734	0.35863
Q02817	MUC2	-0.0575103	0.358681
Q9H6Q3	SLA2	-0.183346	0.358792
Q9Y3B9	RRP15	0.14774	0.358807
Q9NZR1	TMOD2	-0.158043	0.35933
Q96GA7	SDSL	0.176574	0.359558
Q8N668	COMMD1	-0.168642	0.359686
Q9BZF9	UACA	-0.182749	0.359782
Q8NFY4	SEMA6D	0.165012	0.359951
P22792	CPN2	-0.0681576	0.360454
O14647	CHD2	0.147017	0.360868
Q15366	PCBP2	-0.194122	0.360929
Q8IZF3	ADGRF4	-0.197845	0.360987
Q6PKG0	LARP1	-0.157453	0.361302
Q9UGT4	SUSD2	-0.116444	0.361407
P24855	DNASE1	0.097115	0.361546
Q14435	GALNT3	-0.107088	0.36167
Q9Y3L3	SH3BP1	-0.194154	0.361993
Q5TD94	RSPH4A	0.141344	0.362025
Q8IUW3	SPATA2L	-0.124377	0.362406
Q9HD47	RANGRF	-0.183237	0.362534
Q8WXW3	PIBF1	-0.167969	0.362721
P29474	NOS3	-0.0968956	0.362835
Q8N307	MUC20	0.114405	0.362983
Q5T3I0	GPATCH4	0.185957	0.363125
Q9NR28	DIABLO	-0.184234	0.363272
Q66K79	CPZ	-0.116291	0.363299
Q08378	GOLGA3	-0.164216	0.363381
Q9P1Z2	CALCOCO1	-0.190481	0.36355
P08240	SRPRA	0.109451	0.363727
Q15643	TRIP11	-0.17571	0.363921
Q9Y286	SIGLEC7	-0.103408	0.364021
Q9HCY8	S100A14	0.0738584	0.364104
O43734	TRAF3IP2	0.117034	0.364232
Q9Y653	ADGRG1	-0.0626695	0.364398
Q08345	DDR1	-0.16787	0.364651
Q8WYQ3	CHCHD10	0.142004	0.365333
Q9H4K7	MTG2	-0.153019	0.36548
P12757	SKIL	-0.139864	0.365601
P49223	SPINT3	-0.0580373	0.365659
P24387	CRHBP	-0.147663	0.365673
O60449	LY75	-0.088758	0.366031
Q6IQ19	CCSAP	-0.107565	0.366295
Q9UHX3	ADGRE2	-0.119952	0.366389
Q9UKU9	ANGPTL2	-0.121911	0.366415
Q9H773	DCTPP1	0.161503	0.366443
A2RUC4	TYW5	-0.157559	0.366557
Q5K130	CLLU1-AS1	0.188559	0.366748
Q969V6	MRTFA	-0.17378	0.366772
P23284	PPIB	-0.177596	0.366905
Q14244	MAP7	-0.156198	0.366928
Q9H492	MAP1LC3A	0.192946	0.366936
Q14512	FGFBP1	-0.121955	0.36712
Q9UJK0	TSR3	0.155028	0.367362
Q9BWV1	BOC	0.122132	0.368118
Q99583	MNT	0.157377	0.368132
Q01113	IL9R	-0.135423	0.368537
P32927	CSF2RB	-0.0592881	0.368668
Q8N8Y2	ATP6V0D2	-0.104657	0.369357
P02760	AMBP	-0.123869	0.370496
Q8WZ75	ROBO4	0.173807	0.370559
Q6UXK5	LRRN1	-0.118668	0.370642
Q9BVM4	GGACT	-0.178648	0.371681
Q86X76	NIT1	-0.189298	0.371962
Q5H9B9	BMP2KL	-0.179574	0.372092
Q8WUD1	RAB2B	-0.182384	0.372252
P55316	FOXG1	-0.183238	0.372364
Q9UNK0	STX8	-0.162848	0.372926
O43283	MAP3K13	-0.193233	0.373264
Q674X7	KAZN	-0.166338	0.373548
Q6IPM2	IQCE	-0.125871	0.373554
Q9H4X1	RGCC	-0.175815	0.373967
Q8TCY5	MRAP	0.0887354	0.374083
Q86SE5	RALYL	-0.127973	0.374334
Q9NWW7	C2orf42	0.194038	0.374452
Q96DR5	BPIFA2	0.0930177	0.374587
Q99062	CSF3R	-0.115823	0.374768
P60484	PTEN	-0.170021	0.374773
Q9UL68	MYT1L	0.196543	0.37487
O95393	BMP10	0.156074	0.375012
O94989	ARHGEF15	0.142929	0.375154
P78352	DLG4	-0.182437	0.37519
P78380	OLR1	-0.105511	0.375307
P01008	SERPINC1	-0.147936	0.376337
A6NDU8	RIMOC1	-0.192884	0.3767
P80075	CCL8	-0.112094	0.376718
O14933	UBE2L6	-0.176538	0.376915
P35916	FLT4	-0.173756	0.377025
Q13017	ARHGAP5	-0.116344	0.377039
P02751	FN1	0.18193	0.377074
P19174	PLCG1	-0.150629	0.37709
Q9H939	PSTPIP2	-0.176796	0.37728
Q9NRE2	TSHZ2	0.128399	0.377611
P48023	FASLG	-0.0834681	0.377721
Q86UX6	STK32C	-0.096089	0.377965
Q9Y4C0	NRXN3	-0.195531	0.378107
O95166	GABARAP	0.159748	0.378396
Q9Y6Q6	TNFRSF11A	0.118018	0.378452
Q9NQG5	RPRD1B	0.176876	0.378495
P11836	MS4A1	-0.123421	0.378667
Q9Y2X7	GIT1	-0.178931	0.378671
P37023	ACVRL1	0.134403	0.378839
Q9UI10	EIF2B4	-0.189604	0.378938
P08709	F7	-0.16699	0.380257
O15264	MAPK13	0.16999	0.380298
P52564	MAP2K6	-0.172258	0.380437
Q16653	MOG	0.107743	0.380531
O14558	HSPB6	-0.105083	0.380714
Q6QNY1	BLOC1S2	0.145089	0.380991
Q63HQ2	EGFLAM	0.129015	0.381027
Q9NX24	NHP2	0.193595	0.381058
Q05925	EN1	-0.151471	0.381184
P98170	XIAP	-0.169352	0.381287
Q13296	SCGB2A2	0.165776	0.381347
Q9NV35	NUDT15	-0.194905	0.381523
B2RUY7	VWC2L	-0.124804	0.381987
O60235	TMPRSS11D	-0.0964285	0.382025
Q6UUV9	CRTC1	0.164272	0.382047
P23677	ITPKA	-0.179655	0.38215
O43296	ZNF264	0.179927	0.382239
Q8WVS4	DYNC2I1	-0.16193	0.382278
P08246	ELANE	-0.119103	0.382415
Q96AT9	RPE	0.18885	0.382721
Q7Z6P3	RAB44	0.128752	0.382804
P29475	NOS1	0.155261	0.383061
O75882	ATRN	-0.140488	0.383064
Q8NC67	NETO2	0.166297	0.38314
Q9NZD4	AHSP	-0.165986	0.383205
Q01201	RELB	-0.0828928	0.383307
Q7L266	ASRGL1	-0.151083	0.383354
P15311	EZR	-0.151427	0.383428
P19876	CXCL3	-0.16616	0.38355
P52888	THOP1	-0.154906	0.383728
Q9H3T3	SEMA6B	-0.115715	0.383979
P09693	CD3G	0.0648348	0.384004
P51808	DYNLT3	-0.185662	0.384044
Q9BT81	SOX7	0.164671	0.384106
O75528	TADA3	-0.158962	0.384408
P07339	CTSD	-0.0658496	0.384499
[truncated: 3,417 more rows]
