# Supplementary material for: Plasma Proteomics Identifies Insulin Resistance Signatures Predictive of Cardiometabolic Disease Risk
Source: Research Square preprint supplement (doi:10.21203/rs.3.rs-8585654/v1), 2026-01-21
Supplement: Supplementary file 22 [file Supplementary_Table_07.xlsx]

## Sheet: results_anypre_anypost_10y
phecode	predictor	cases	controls	C_test	C_boot_low	C_boot_high	disease
EM_202.1	HbA1c	65	20456	0.93837	0.868123	0.98521	Type 1 diabetes
EM_202.2	HbA1c	898	19345	0.880127	0.852849	0.907754	Type 2 diabetes
EM_202.2	Predicted_Mvalue	898	19345	0.864042	0.841169	0.886321	Type 2 diabetes
MS_703.1	Predicted_Mvalue	178	20420	0.797241	0.743947	0.848873	Gout
GI_542.2	Predicted_Mvalue	143	20444	0.782975	0.705713	0.851397	Fatty liver disease (FLD)
GU_582.21	Predicted_Mvalue	60	20524	0.782739	0.627728	0.908045	End stage renal disease [CKD stage 5]
NS_333.1	Predicted_Mvalue	222	20296	0.781647	0.719007	0.844079	Sleep apnea
EM_202.1	Predicted_Mvalue	65	20456	0.755196	0.601185	0.899581	Type 1 diabetes
MS_703.1	TG_HDL_ratio	178	20420	0.754273	0.679067	0.82099	Gout
EM_208.2	TG_HDL_ratio	44	20561	0.753623	0.600412	0.875033	Hyperparathyroidism
EM_236.1	Predicted_Mvalue	868	19603	0.747925	0.71833	0.776373	Obesity
GU_582.2	Predicted_Mvalue	472	20097	0.742614	0.696044	0.782174	Chronic kidney disease
EM_202.2	TG_HDL_ratio	898	19345	0.738804	0.705977	0.768449	Type 2 diabetes
GI_552.1	Predicted_Mvalue	62	20541	0.736751	0.624584	0.832168	Cholangitis
GU_582.21	HbA1c	60	20524	0.730579	0.596549	0.865362	End stage renal disease [CKD stage 5]
GU_582.21	TG_HDL_ratio	60	20524	0.728155	0.614548	0.838657	End stage renal disease [CKD stage 5]
EM_208.2	Predicted_Mvalue	44	20561	0.713167	0.595669	0.817629	Hyperparathyroidism
NS_333.1	HbA1c	222	20296	0.701557	0.619185	0.781639	Sleep apnea
CV_424	Predicted_Mvalue	371	20143	0.698929	0.652003	0.745833	Heart failure
NS_333.1	TG_HDL_ratio	222	20296	0.697563	0.63886	0.753041	Sleep apnea
CA_108.5	Predicted_Mvalue	102	20462	0.694649	0.58303	0.799789	Malignant neoplasm of the bladder
CV_431.11	Predicted_Mvalue	235	20321	0.693767	0.629299	0.759546	Cerebral infarction [Ischemic stroke]
CV_404.1	Predicted_Mvalue	555	19789	0.688403	0.646868	0.726763	Myocardial infarction [Heart attack]
CV_401	Predicted_Mvalue	3551	15293	0.676106	0.658491	0.693531	Hypertension
RE_474	Predicted_Mvalue	634	19812	0.67514	0.63413	0.710973	Chronic obstructive pulmonary disease [COPD]
MS_715.1	Predicted_Mvalue	158	20403	0.675108	0.601022	0.744164	Spondylosis
GU_582.2	HbA1c	472	20097	0.674812	0.623807	0.730122	Chronic kidney disease
GI_542.2	TG_HDL_ratio	143	20444	0.67357	0.585246	0.753124	Fatty liver disease (FLD)
CV_414	Predicted_Mvalue	80	20505	0.67257	0.55925	0.791071	Cardiomyopathy
CA_102.1	Predicted_Mvalue	156	20434	0.670086	0.591533	0.745821	Malignant neoplasm of bronchus/lung
CV_404.2	Predicted_Mvalue	802	19297	0.666267	0.630176	0.702258	Coronary atherosclerosis
CA_122.2	HbA1c	71	20503	0.665986	0.560477	0.749991	Non-Hodgkin lymphoma
CV_414	TG_HDL_ratio	80	20505	0.66329	0.552347	0.763743	Cardiomyopathy
NS_328.1	Predicted_Mvalue	135	20471	0.65589	0.556968	0.743648	Dementias
CV_414	HbA1c	80	20505	0.655574	0.523786	0.784563	Cardiomyopathy
CV_431.11	TG_HDL_ratio	235	20321	0.652377	0.576438	0.72269	Cerebral infarction [Ischemic stroke]
EM_208.2	HbA1c	44	20561	0.650889	0.434412	0.83256	Hyperparathyroidism
CA_101.1	Predicted_Mvalue	55	20548	0.650855	0.507863	0.793827	Malignant neoplasm of the esophagus
CA_102.1	HbA1c	156	20434	0.646295	0.555479	0.729573	Malignant neoplasm of bronchus/lung
CV_403	Predicted_Mvalue	619	19486	0.641995	0.600898	0.684317	Angina pectoris
GI_552.1	TG_HDL_ratio	62	20541	0.641171	0.484849	0.790438	Cholangitis
CA_101.41	Predicted_Mvalue	234	20261	0.639892	0.571225	0.70855	Colorectal cancer
CV_424	HbA1c	371	20143	0.635884	0.577938	0.696354	Heart failure
EM_247.88	HbA1c	522	19940	0.634255	0.585233	0.684292	Iron deficiency
MS_708	Predicted_Mvalue	1944	17872	0.632255	0.610125	0.656599	Osteoarthritis
CV_431.11	HbA1c	235	20321	0.629222	0.552791	0.705284	Cerebral infarction [Ischemic stroke]
GI_550.1	Predicted_Mvalue	537	19679	0.625955	0.581486	0.669332	Gallstones
EM_247.88	Predicted_Mvalue	522	19940	0.624927	0.57477	0.675174	Iron deficiency
EM_236.1	TG_HDL_ratio	868	19603	0.624045	0.585042	0.657555	Obesity
GI_554.11	Predicted_Mvalue	94	20469	0.623295	0.509796	0.721734	Acute pancreatitis
CV_404.1	HbA1c	555	19789	0.621535	0.572994	0.668996	Myocardial infarction [Heart attack]
CA_112	Predicted_Mvalue	912	19370	0.619365	0.583416	0.652236	Malignant neoplasm of other/ill-defined sites
SO_375.1	HbA1c	251	20295	0.619289	0.54862	0.690283	Glaucoma
RE_474	HbA1c	634	19812	0.618815	0.572539	0.667352	Chronic obstructive pulmonary disease [COPD]
CA_136.2	Predicted_Mvalue	324	20202	0.616634	0.553063	0.670928	Benign neoplasm of stomach
CV_404.1	TG_HDL_ratio	555	19789	0.614122	0.568376	0.66103	Myocardial infarction [Heart attack]
GU_581	Predicted_Mvalue	199	20328	0.608728	0.537515	0.679576	Renal tubulo-interstitial diseases
CV_403	TG_HDL_ratio	619	19486	0.606419	0.562101	0.6482	Angina pectoris
CV_404.2	TG_HDL_ratio	802	19297	0.606106	0.565775	0.644571	Coronary atherosclerosis
CV_401	HbA1c	3551	15293	0.604706	0.586818	0.624093	Hypertension
CA_101.41	HbA1c	234	20261	0.602859	0.533619	0.678347	Colorectal cancer
CA_122.2	TG_HDL_ratio	71	20503	0.602024	0.459416	0.725165	Non-Hodgkin lymphoma
GU_594.3	Predicted_Mvalue	262	20075	0.599938	0.533626	0.666373	Urinary incontinence and enuresis
GU_585	Predicted_Mvalue	182	20241	0.595631	0.514974	0.675386	Kidney stone disease
NS_328.1	HbA1c	135	20471	0.593979	0.484964	0.698861	Dementias
CV_401	TG_HDL_ratio	3551	15293	0.59306	0.573783	0.610304	Hypertension
MS_715.1	TG_HDL_ratio	158	20403	0.586912	0.502785	0.662037	Spondylosis
GI_552.1	HbA1c	62	20541	0.585952	0.441152	0.730454	Cholangitis
CA_108.5	HbA1c	102	20462	0.584535	0.438849	0.72093	Malignant neoplasm of the bladder
GI_542.2	HbA1c	143	20444	0.584284	0.476888	0.687119	Fatty liver disease (FLD)
MS_715.1	HbA1c	158	20403	0.583163	0.502511	0.671671	Spondylosis
CV_424	TG_HDL_ratio	371	20143	0.582491	0.527332	0.639196	Heart failure
EM_236.1	HbA1c	868	19603	0.581638	0.539282	0.621718	Obesity
CA_105	TG_HDL_ratio	436	19795	0.578679	0.526317	0.63002	Malignant neoplasm of the breast
NS_328.1	TG_HDL_ratio	135	20471	0.577424	0.485093	0.675469	Dementias
CV_404.2	HbA1c	802	19297	0.576907	0.53676	0.619553	Coronary atherosclerosis
GI_550.1	TG_HDL_ratio	537	19679	0.574069	0.528073	0.617216	Gallstones
CA_101.41	TG_HDL_ratio	234	20261	0.572826	0.503342	0.645039	Colorectal cancer
CA_108.5	TG_HDL_ratio	102	20462	0.571403	0.451108	0.692414	Malignant neoplasm of the bladder
GU_582.2	TG_HDL_ratio	472	20097	0.571039	0.522564	0.623724	Chronic kidney disease
CV_403	HbA1c	619	19486	0.570243	0.524519	0.61577	Angina pectoris
MS_703.1	HbA1c	178	20420	0.56612	0.475175	0.656861	Gout
MS_708	HbA1c	1944	17872	0.565853	0.538778	0.590512	Osteoarthritis
CA_122.2	Predicted_Mvalue	71	20503	0.5656	0.423627	0.696972	Non-Hodgkin lymphoma
CA_136.2	HbA1c	324	20202	0.560623	0.493185	0.624706	Benign neoplasm of stomach
SO_375.1	Predicted_Mvalue	251	20295	0.55708	0.492359	0.627661	Glaucoma
GU_594.3	HbA1c	262	20075	0.550425	0.476494	0.619993	Urinary incontinence and enuresis
GI_554.11	TG_HDL_ratio	94	20469	0.549577	0.430605	0.657858	Acute pancreatitis
CA_101.1	TG_HDL_ratio	55	20548	0.548384	0.368528	0.724081	Malignant neoplasm of the esophagus
MS_708	TG_HDL_ratio	1944	17872	0.545037	0.521632	0.568619	Osteoarthritis
EM_247.88	TG_HDL_ratio	522	19940	0.541648	0.49569	0.589801	Iron deficiency
CA_112	HbA1c	912	19370	0.541349	0.501628	0.57936	Malignant neoplasm of other/ill-defined sites
GU_581	HbA1c	199	20328	0.539978	0.43198	0.630869	Renal tubulo-interstitial diseases
CA_112	TG_HDL_ratio	912	19370	0.534632	0.497505	0.574823	Malignant neoplasm of other/ill-defined sites
RE_474	TG_HDL_ratio	634	19812	0.533838	0.490537	0.579889	Chronic obstructive pulmonary disease [COPD]
GU_585	TG_HDL_ratio	182	20241	0.522929	0.447856	0.601535	Kidney stone disease
GU_585	HbA1c	182	20241	0.522826	0.434352	0.611941	Kidney stone disease
GI_550.1	HbA1c	537	19679	0.517742	0.466531	0.570107	Gallstones
CA_105	Predicted_Mvalue	436	19795	0.516923	0.463266	0.56695	Malignant neoplasm of the breast
CA_101.1	HbA1c	55	20548	0.510147	0.321598	0.688793	Malignant neoplasm of the esophagus
GU_581	TG_HDL_ratio	199	20328	0.500437	0.429211	0.577795	Renal tubulo-interstitial diseases
GU_594.3	TG_HDL_ratio	262	20075	0.491805	0.423337	0.552318	Urinary incontinence and enuresis
EM_202.1	TG_HDL_ratio	65	20456	0.487881	0.339915	0.628936	Type 1 diabetes
CA_136.2	TG_HDL_ratio	324	20202	0.47245	0.416979	0.529574	Benign neoplasm of stomach
GI_554.11	HbA1c	94	20469	0.472362	0.369374	0.587351	Acute pancreatitis
SO_375.1	TG_HDL_ratio	251	20295	0.462012	0.385945	0.537352	Glaucoma
CA_105	HbA1c	436	19795	0.436274	0.383279	0.4853	Malignant neoplasm of the breast
CA_102.1	TG_HDL_ratio	156	20434	0.411968	0.331431	0.493778	Malignant neoplasm of bronchus/lung
